# Supplementary material for: Pycnoscelus surinamensis cockroach gut microbiota respond consistently to a fungal diet without mirroring those of fungus-farming termites
Source: PLoS One. 2017 Oct 3;12(10):e0185745. doi: 10.1371/journal.pone.0185745 (PMC5626473; doi:10.1371/journal.pone.0185745)
Supplement: S3 Table — The average relative abundance of each OTU across the 18 biological replicates is shown. (XLSX) [file pone.0185745.s003.xlsx]

## Sheet: S3 Table
Table S3. Relative abundances of OTUs across the six diet treatments, averaged across three technical replicates. The average relative abundance of each OTU across the 18 biological replicates is shown.
OTU	Phylum	Class	Order	Family	Genus	T 0% fungus Repl. 1	T 0% fungus Repl. 2	T 0% fungus Repl. 3	T 20% fungus Repl. 1	T 20% fungus Repl. 2	T 20% fungus Repl. 3	T 40% fungus Repl. 1	T 40% fungus Repl. 2	T 40% fungus Repl. 3	T 60% fungus Repl. 1	T 60% fungus Repl. 2	T 60% fungus Repl. 3	T 80% fungus Repl. 1	T 80% fungus Repl. 2	T 80% fungus Repl. 3	T 100% fungus Repl. 1	T 100% fungus Repl. 2	T 100% fungus Repl. 3	Average
1	Firmicutes	Bacilli	Lactobacillales	Lactobacillaceae	Lactobacillus_4	1.39398	6.72536	2.82465	5.72267	2.44559	5.4292	3.00807	3.25263	4.98899	4.27978	1.63854	3.44828	4.08413	7.55686	5.94277	8.62069	3.326	3.74175	4.35722
2	Synergistetes	Synergistia	Synergistales	Synergistaceae	Candidatus_Tammella	3.44828	4.13304	3.77843	3.93739	3.69283	2.73906	4.05967	4.76889	3.22817	3.96185	5.52702	3.03253	4.1575	4.1575	2.86134	2.23771	2.20103	3.30154	3.62354
3	Firmicutes	Bacilli	Lactobacillales	Lactobacillales_unclassified	Lactobacillales_unclassified	0.782587	2.07875	4.58547	2.95916	1.663	3.64392	3.44828	4.76889	1.90756	5.23355	3.88848	3.39936	4.74444	4.67107	4.94008	2.45781	2.69014	2.45781	3.35113
4	Planctomycetes	Planctomycetacia	Planctomycetales	Planctomycetaceae	Termite_cockroach_cluster_1	6.82318	7.21448	6.93324	3.37491	4.18195	3.71729	2.39667	4.01076	1.94424	3.52164	3.79066	4.3776	1.68745	2.98361	1.22279	0.0366838	0.269014	0.220103	3.26146
5	Firmicutes	Clostridia_1	Clostridiales	Lachnospiraceae	Lachnospiraceae_unclassified	0.464661	0.807043	3.44828	1.39398	1.8831	3.79066	2.54341	2.17657	1.65077	3.9863	2.15212	2.42113	3.91294	2.88579	2.59232	2.20103	2.42113	1.43067	2.34233
6	Proteobacteria	Deltaproteobacteria	Desulfovibrionales	Desulfovibrionaceae	Gut_cluster_3	1.71191	1.46735	1.61409	2.17657	2.1032	1.83419	2.34776	1.83419	1.50404	2.05429	2.17657	2.29885	2.7146	1.51626	2.42113	2.23771	2.44559	1.90756	2.02033
7	Actinobacteria	Actinobacteria	Actinomycetales	Actinomycetaceae_2	Actinomyces_2	0.440205	0.635852	2.89802	0.758132	1.51626	2.29885	2.15212	2.05429	0.623624	3.03253	2.47004	1.95647	2.37222	2.42113	2.27439	1.79751	1.54072	0.623624	1.77033
9	Bacteroidetes	Bacteroidia	Bacteroidales	Porphyromonadaceae_Gut_group	Termite_cluster_I	1.51626	1.58963	2.60455	1.22279	1.56517	1.71191	1.80973	1.46735	1.90756	1.8831	1.8831	1.95647	2.07875	1.71191	1.12497	0.843727	1.63854	2.34776	1.71463
8	Proteobacteria	Deltaproteobacteria	Desulfovibrionales	Desulfovibrionaceae	Gut_cluster_3	1.58963	0.929323	0.843727	2.37222	1.68745	1.00269	1.8831	1.98092	1.83419	2.34776	2.17657	1.95647	1.73637	1.41844	2.05429	2.09098	1.39398	1.1372	1.69085
11	Proteobacteria	Betaproteobacteria	SC-I-84	Insect_cluster_II	Insect_cluster_II_unclassified	4.27978	2.86134	2.78797	0.489117	2.4945	2.00538	1.93201	0.953778	0.256787	1.19834	0.978234	1.2717	0.464661	0.464661	0.269014	3.37491	1.10051	2.31108	1.63854
10	Firmicutes	Bacilli	Lactobacillales	Leuconostocaceae	Weissella_1	0.855955	1.63854	0.513573	4.5977	1.0516	1.61409	0.782587	3.35045	1.24725	0.978234	0.611396	0.489117	0.684764	0.953778	1.49181	3.88848	3.15481	0.917095	1.60118
12	Bacteroidetes	Bacteroidia	Bacteroidales	Porphyromonadaceae_3	Tannerella	0.586941	0.807043	0.586941	0.782587	1.2717	2.64123	1.46735	0.562485	2.42113	0.929323	1.8831	1.39398	2.15212	1.90756	1.19834	1.43067	1.98092	1.21056	1.40078
13	Bacteroidetes	Bacteroidetes_unclassified	Bacteroidetes_unclassified	Bacteroidetes_unclassified	Bacteroidetes_unclassified	2.07875	1.14943	1.10051	1.73637	1.68745	1.39398	1.56517	1.36953	0.880411	1.0516	1.63854	1.56517	1.41844	0.953778	1.68745	0.623624	0.684764	0.586941	1.28733
14	Proteobacteria	Betaproteobacteria	Betaproteobacteria_unclassified	Betaproteobacteria_unclassified	Betaproteobacteria_unclassified	1.29616	0.953778	1.02715	0.684764	1.32062	1.34507	1.41844	1.10051	1.24725	1.61409	1.71191	1.22279	1.34507	0.758132	0.489117	1.5774	0.831499	2.67792	1.25676
15	Bacteroidetes	Bacteroidia	Bacteroidales	Porphyromonadaceae_2	Porphyromonadaceae_2_unclassified	0.195647	0.41575	0.256787	0.855955	1.0516	0.953778	1.39398	1.14943	2.12766	2.12766	1.2717	1.85865	0.684764	1.24725	1.56517	1.50404	1.85865	1.46735	1.22143
16	Bacteroidetes	Bacteroidia	Bacteroidales	Porphyromonadaceae_3	Cluster_IV	1.02715	0.953778	1.10051	0.855955	1.19834	1.12497	1.07606	0.978234	1.28393	1.02715	0.953778	1.2717	0.70922	0.831499	0.733676	0.733676	2.98361	1.1372	1.11002
17	Firmicutes	Clostridia_1	Clostridiales	Lachnospiraceae	Gut_cluster_13	1.02715	1.07606	0.660308	1.17388	0.978234	0.782587	0.855955	0.904867	1.06383	0.880411	1.61409	1.36953	0.855955	1.2717	1.2717	1.39398	0.807043	1.28393	1.07062
18	Firmicutes	Clostridia_1	Clostridiales	Family_XIII_Incertae_Sedis	Family_XIII_Incertae_Sedis_unclassified	0.758132	0.70922	1.28393	0.978234	1.2717	1.12497	0.855955	1.07606	1.1372	0.904867	1.61409	1.02715	1.12497	0.684764	1.2717	1.21056	0.782587	1.39398	1.06723
19	Bacteroidetes	Bacteroidia	Bacteroidales	Porphyromonadaceae_Gut_group	Termite_cluster_I	1.4429	1.17388	1.02715	1.07606	1.56517	1.22279	1.22279	1.36953	1.3573	0.70922	0.978234	1.39398	0.758132	0.538029	0.635852	0.29347	0.611396	0.807043	1.01016
20	Bacteroidetes	Bacteroidia	Bacteroidales	Porphyromonadaceae_3	Porphyromonadaceae_3_unclassified	0.0978234	0.538029	0.183419	0.586941	0.220103	0.855955	1.68745	0.855955	1.5774	1.14943	0.953778	1.17388	1.17388	1.29616	1.41844	0.880411	2.00538	0.990462	0.980272
21	Firmicutes	Clostridia_1	Clostridiales	Lachnospiraceae	Gut_cluster_13	1.2717	0.807043	0.917095	0.929323	0.733676	1.10051	0.855955	0.660308	1.21056	0.978234	0.831499	0.831499	0.929323	0.831499	0.904867	1.17388	0.855955	0.807043	0.923888
22	Proteobacteria	Deltaproteobacteria	Desulfovibrionales	Desulfovibrionaceae	Gut_cluster_3	0.880411	0.758132	0.440205	0.807043	1.22279	0.586941	0.855955	1.24725	1.17388	0.904867	1.12497	0.880411	1.0516	0.758132	0.929323	0.917095	0.758132	0.880411	0.898753
23	Bacteroidetes	Bacteroidia	Bacteroidales	Porphyromonadaceae_Cluster_V	Porphyromonadaceae_Cluster_V_unclassified	0.635852	0.513573	1.54072	0.611396	0.586941	0.733676	0.611396	1.14943	1.28393	0.782587	0.635852	0.855955	0.782587	0.733676	1.07606	0.77036	0.880411	1.28393	0.859352
24	Bacteroidetes	Bacteroidia	Bacteroidales	Porphyromonadaceae_3	Tannerella	0.807043	0.562485	0.476889	1.00269	1.00269	0.904867	0.880411	0.978234	0.990462	0.807043	0.904867	0.880411	0.70922	0.440205	1.07606	0.220103	0.978234	0.77036	0.799571
25	Bacteroidetes	Bacteroidia	Bacteroidales	Bacteroidaceae	Bacteroides	0.684764	0.880411	0.29347	1.56517	1.24725	0.782587	0.855955	1.19834	0.696992	0.758132	0.317926	0.586941	0.733676	0.342382	0.684764	0.29347	0.538029	0.440205	0.716692
26	Firmicutes	Clostridia_1	Clostridiales	Ruminococcaceae	Termite_cockroach_cluster	0.513573	0.684764	0.586941	0.220103	0.855955	0.70922	0.586941	0.41575	0.550257	1.10051	0.733676	0.684764	0.538029	0.440205	0.611396	0.953778	0.929323	1.72414	0.713296
30	Proteobacteria	Deltaproteobacteria	Rs-K70	Rs-K70_unclassified	Rs-K70_unclassified	0.855955	0.660308	0.586941	0.635852	0.733676	0.684764	0.513573	0.635852	1.02715	0.733676	0.440205	0.758132	0.562485	0.317926	0.758132	0.623624	0.586941	0.586941	0.650118
27	Firmicutes	Clostridia_2	Clostridiales_1	Veillonellaceae	Uncultured_8	1.19834	0.855955	0.256787	0.70922	0.831499	0.513573	0.586941	0.391294	0.366838	0.635852	0.782587	1.32062	0.513573	0.855955	0.269014	0.476889	0.342382	0.660308	0.642646
29	Proteobacteria	Deltaproteobacteria	Desulfobacterales	Desulfobacteraceae	Desulfobotulus	0.880411	0.464661	0.476889	0.929323	0.611396	0.562485	0.611396	0.440205	0.660308	0.758132	0.807043	0.807043	0.807043	0.586941	0.342382	0.330154	0.586941	0.807043	0.637211
28	Bacteroidetes	Bacteroidia	Bacteroidales	Porphyromonadaceae_Gut_group	Butyricimonas	0.855955	0.635852	0.550257	0.807043	1.10051	0.391294	1.0516	0.562485	0.660308	0.758132	0.464661	0.904867	0.440205	0.41575	0.391294	0.330154	0.635852	0.366838	0.629059
32	Bacteroidetes	Bacteroidia	Bacteroidales	Bacteroidaceae	Bacteroides	0.831499	0.782587	0.733676	0.513573	0.660308	0.41575	0.635852	0.41575	0.77036	0.366838	0.29347	0.29347	0.317926	0.513573	0.195647	0.990462	1.34507	0.880411	0.608679
33	Firmicutes	Clostridia_1	Clostridiales	Lachnospiraceae	Lachnospiraceae_unclassified	0	0.41575	0.330154	0.855955	0.122279	0.342382	0.29347	0.635852	0.29347	0.29347	0.317926	0.220103	0.880411	0.513573	1.85865	1.1372	1.2717	0.807043	0.588299
31	Proteobacteria	Epsilonproteobacteria	Campylobacterales	Campylobacteraceae	Sulfurospirillum	1.56517	0.244559	0.696992	1.49181	0.29347	0.70922	0.366838	0.391294	0.696992	0.366838	0.807043	0.635852	0.660308	0.317926	0.146735	0.330154	0.538029	0.29347	0.586261
34	Firmicutes	Clostridia_1	Clostridiales	Ruminococcaceae	Termite_cockroach_cluster	0.880411	1.00269	1.24725	0.29347	0.855955	0.782587	0.70922	0.489117	0.476889	0.538029	0.513573	0.562485	0.342382	0.366838	0.317926	0.220103	0.342382	0.330154	0.570637
35	Firmicutes	Bacilli	Lactobacillales	Lactobacillales_unclassified	Lactobacillales_unclassified	0.146735	0.342382	0.623624	0.782587	0.122279	0.635852	0.758132	0.635852	0.586941	0.513573	0.366838	0.317926	0.586941	0.513573	1.00269	0.550257	0.635852	0.660308	0.543463
36	Bacteroidetes	Bacteroidia	Bacteroidales	Marinilabiaceae	Uncultured_1	0.782587	0.562485	0.733676	0.269014	0.684764	0.41575	0.684764	0.440205	0.440205	0.782587	0.538029	0.70922	0.171191	0.146735	0.220103	0.513573	0.880411	0.623624	0.533274
37	Synergistetes	Synergistia	Synergistales	Synergistaceae	Synergistaceae_unclassified	0.220103	0.807043	0.256787	0.440205	0.489117	0.317926	1.00269	0.489117	0.29347	0.538029	1.10051	0.366838	0.29347	0.684764	0.41575	0.807043	0.244559	0.696992	0.525801
38	Firmicutes	Firmicutes_unclassified	Firmicutes_unclassified	Firmicutes_unclassified	Firmicutes_unclassified	0.807043	0.562485	0.660308	0.440205	0.635852	0.464661	0.41575	0.342382	0.586941	0.464661	0.733676	0.611396	0.464661	0.440205	0.366838	0.403522	0.41575	0.586941	0.522404
42	Bacteroidetes	Bacteroidia	Bacteroidales	Porphyromonadaceae_3	Porphyromonadaceae_3_unclassified	0.29347	0.855955	0.917095	0.391294	0.489117	0.440205	0.366838	0.244559	0.513573	0.342382	0.41575	0.684764	0.513573	0.513573	0.317926	0.513573	0.489117	0.696992	0.499986
40	Firmicutes	Clostridia_1	Clostridiales	Ruminococcaceae	Termite_cockroach_cluster	0.929323	0.562485	0.696992	0.342382	0.440205	0.855955	0.782587	0.440205	0.586941	0.611396	0.29347	0.513573	0.195647	0.342382	0.391294	0.330154	0.317926	0.330154	0.497948
41	Bacteroidetes	Bacteroidia	Bacteroidales	Porphyromonadaceae_Cluster_V	Cockroach_cluster	0.831499	0.342382	0.476889	0.855955	0.758132	0.41575	0.513573	0.758132	0.660308	0.41575	0.366838	0.440205	0.538029	0.195647	0.41575	0.0733676	0.41575	0.330154	0.489117
43	Bacteroidetes	Sphingobacteria	Sphingobacteriales_1	SB_1	SB_1_unclassified	0.611396	0.317926	0.513573	0.831499	0.684764	0.342382	0.70922	0.635852	0.623624	0.29347	0.269014	0.489117	0.440205	0.317926	0.464661	0.366838	0.269014	0.476889	0.480965
44	Bacteroidetes	Bacteroidia	Bacteroidales	Bacteroidales_unclassified	Bacteroidales_unclassified	0.122279	0.122279	0	0.366838	0.317926	0.195647	0.146735	0.0978234	1.24725	0.195647	0	0.733676	0.366838	2.15212	0.29347	1.21056	0.978234	0.110051	0.480965
39	Verrucomicrobia	Verrucomicrobia_unclassified	Verrucomicrobia_unclassified	Verrucomicrobia_unclassified	Verrucomicrobia_unclassified	0.0978234	0.146735	0.366838	0.391294	0.195647	0.342382	0.513573	0.635852	0.513573	0.782587	0.342382	0.538029	0.684764	0.586941	1.76082	0.256787	0.317926	0.146735	0.478927
45	Bacteroidetes	Bacteroidia	Bacteroidales	Porphyromonadaceae_Cluster_V	Porphyromonadaceae_Cluster_V_unclassified	0.391294	0.366838	0.440205	0.538029	0.855955	0.538029	0.758132	0.29347	0.513573	0.489117	0.41575	0.440205	0.317926	0.171191	0.41575	0.550257	0.244559	0.623624	0.464661
46	Bacteroidetes	Bacteroidia	Bacteroidales	Rikenellaceae	Alistipes_III	1.07606	0.366838	0.77036	0.586941	0.562485	0.513573	0.41575	0.342382	0.146735	0.29347	0.29347	0.269014	0.244559	0.41575	0.513573	0.330154	0.440205	0.77036	0.463982
47	Bacteroidetes	Bacteroidia	Bacteroidales	Porphyromonadaceae_Cluster_V	Porphyromonadaceae_Cluster_V_unclassified	0.269014	0.513573	0.29347	0.29347	0.489117	0.366838	0.29347	0.41575	0.476889	0.29347	0.464661	0.782587	0.29347	0.440205	0.440205	0.550257	0.684764	0.807043	0.453792
48	Bacteroidetes	Bacteroidia	Bacteroidales	Porphyromonadaceae_Cluster_V	Porphyromonadaceae_Cluster_V_unclassified	1.02715	0.807043	0.330154	0.611396	0.489117	0.342382	0.464661	0.464661	0.513573	0.269014	0.41575	0.29347	0.269014	0.195647	0.317926	0.183419	0.538029	0.256787	0.432733
50	Firmicutes	Clostridia_1	Clostridiales	Lachnospiraceae	Gut_cluster_13	0.41575	0.562485	0.880411	0.366838	0.586941	0.195647	0.464661	0.366838	0.403522	0.391294	0.366838	0.489117	0.29347	0.440205	0.29347	0.330154	0.317926	0.29347	0.414391
49	Bacteroidetes	Bacteroidia	Bacteroidales	Rikenellaceae	Alisitpes_IV	0.684764	0.41575	0.623624	0.391294	0.41575	0.269014	0.758132	0.391294	0.29347	0.220103	0.489117	0.440205	0.29347	0.41575	0.391294	0.256787	0.29347	0.330154	0.409636
53	Actinobacteria	Actinobacteria	Actinobacteria_unclassified	Actinobacteria_unclassified	Actinobacteria_unclassified	0.440205	0.807043	0.330154	0.244559	0.0244559	0.171191	0.0489117	0.29347	0.183419	0.171191	0.953778	0.0244559	0.660308	0.220103	0.391294	1.3573	0.391294	0.586941	0.40556
56	Firmicutes	Clostridia_1	Clostridiales	Peptostreptococcaceae	Peptostreptococcaceae_unclassified	0	0.0244559	0.0366838	0	0.0978234	0.171191	0.0733676	0.0733676	0.146735	0.317926	0.220103	0.41575	0.440205	0.489117	0.29347	1.50404	1.10051	1.87087	0.404201
51	Proteobacteria	Deltaproteobacteria	Desulfovibrionales	Desulfovibrionaceae	Gut_cluster_3	0.366838	0.562485	0.476889	0.41575	0.489117	0.538029	0.41575	0.464661	0.29347	0.29347	0.342382	0.391294	0.244559	0.391294	0.489117	0.256787	0.29347	0.440205	0.398087
55	Proteobacteria	Deltaproteobacteria	Desulfovibrionales	Desulfovibrionaceae	Gut_cluster_3	0.269014	0.195647	0.146735	0.464661	0.440205	0.195647	0.41575	0.269014	0.513573	0.562485	0.440205	0.562485	0.562485	0.0978234	0.244559	0.403522	0.342382	0.733676	0.381104
52	Firmicutes	Clostridia_1	Clostridiales	Ruminococcaceae	Insect_cluster	0.391294	0.489117	0.220103	0.635852	0.611396	0.317926	0.41575	0.317926	0.403522	0.244559	0.538029	0.220103	0.366838	0.29347	0.391294	0.330154	0.41575	0.220103	0.379066
54	Bacteroidetes	Bacteroidia	Bacteroidales	Bacteroidales_unclassified	Bacteroidales_unclassified	0.122279	0.146735	0.843727	0.220103	0.220103	0.317926	0.464661	0.244559	0.256787	0.171191	0.122279	0.513573	1.17388	0.660308	0.611396	0.0366838	0.440205	0.183419	0.37499
57	Bacteroidetes	Bacteroidia	Bacteroidales	Rikenellaceae	Alistipes_II	0.684764	0.440205	0.366838	0.391294	0.366838	0.440205	0.342382	0.220103	0.366838	0.29347	0.146735	0.464661	0.440205	0.391294	0.29347	0.256787	0.269014	0.366838	0.363441
60	Planctomycetes	Planctomycetacia	Planctomycetales	Planctomycetaceae	Termite_cockroach_cluster_2	0.562485	0.440205	0.256787	0.195647	0.391294	0.269014	0.489117	0.146735	0.29347	0.0978234	0.440205	0.220103	0.29347	0.220103	0.244559	0.623624	0.220103	0.513573	0.328795
58	Planctomycetes	Planctomycetacia	Planctomycetales	Planctomycetaceae	Planctomycetaceae_unclassified	1.0516	0.317926	0.330154	0.269014	0.684764	0.244559	0.391294	0.171191	0.330154	0.269014	0.269014	0.366838	0.195647	0.269014	0.0978234	0.256787	0.146735	0.220103	0.326757
59	Firmicutes	Clostridia_1	Clostridiales	Lachnospiraceae	Lachnospiraceae_unclassified	0	0.122279	0.77036	0.122279	0.366838	0.440205	0.562485	0.391294	0.0733676	0.538029	0.0978234	0.0489117	0.660308	0.342382	0.586941	0.330154	0.171191	0.0733676	0.316567
61	Proteobacteria	Deltaproteobacteria	Desulfovibrionales	Desulfovibrionaceae	Gut_cluster_3	0.317926	0.0978234	0.183419	0.611396	0.0489117	0.195647	0.269014	0.538029	0.183419	0.342382	0.391294	0.122279	0.464661	0.29347	0.538029	0.0733676	0.391294	0.476889	0.307736
69	Actinobacteria	Actinobacteria	Corynebacteriales	Mycobacteriaceae	Mycobacterium	0.244559	0.269014	0.880411	0.122279	0.146735	0.122279	0.122279	0.342382	0.0366838	0.489117	0.220103	0.195647	0.269014	0.146735	0.0733676	0.403522	0.513573	0.917095	0.306378
63	Proteobacteria	Betaproteobacteria	Burkholderiales	Oxalobacteraceae	Undibacterium	0.586941	0.29347	0.29347	0.244559	0.562485	0.41575	0.317926	0.366838	0.403522	0.342382	0.366838	0.220103	0.41575	0.171191	0.195647	0.110051	0.0733676	0.0733676	0.302981
64	Lentisphaerae	Lentisphaeria	WCHB1-25	WCHB1-25_unclassified	WCHB1-25_unclassified	0.684764	0.171191	0.183419	0.122279	0.782587	0.391294	0.513573	0.29347	0.660308	0.244559	0.195647	0.464661	0.269014	0.220103	0.0978234	0	0.0733676	0.0733676	0.302302
62	Planctomycetes	Planctomycetacia	Planctomycetales	Planctomycetaceae	Termite_cockroach_cluster_2	0.807043	0.513573	0.220103	0.146735	0.464661	0.70922	0.464661	0.342382	0.330154	0.0733676	0.317926	0.342382	0.171191	0.244559	0.0978234	0.146735	0	0.0366838	0.301622
65	Firmicutes	Clostridia_1	Clostridiales	Lachnospiraceae	Lachnospiraceae_unclassified	0.171191	0.122279	0.0733676	0.391294	0.562485	0.29347	0.513573	0.317926	1.06383	0.464661	0.29347	0.317926	0.0733676	0.317926	0.146735	0.146735	0.0978234	0	0.298226
66	Bacteroidetes	Bacteroidia	Bacteroidales	Porphyromonadaceae_1	Dysgonomonas	0.244559	0.366838	0.220103	0.41575	0.244559	0.171191	0.269014	0.513573	0.403522	0.29347	0.0489117	0.122279	0.317926	0.29347	0.391294	0.256787	0.538029	0.220103	0.296188
68	Planctomycetes	vadinHA49	Insect_cluster	Insect_cluster_unclassified	Insect_cluster_unclassified	0.29347	0.171191	0.29347	0.122279	0.440205	0.317926	0.195647	0.269014	0.256787	0.244559	0.342382	0.440205	0.440205	0.146735	0.391294	0.146735	0.391294	0.366838	0.292791
67	Bacteroidetes	Bacteroidia	Bacteroidales	Rikenellaceae	Rikenellaceae_unclassified	0.171191	0.317926	0.0733676	0.195647	0.269014	0.220103	0.269014	0.342382	0.330154	0.269014	0.562485	0.195647	0.220103	0.317926	0.733676	0.110051	0.29347	0.29347	0.288036
85	Actinobacteria	Actinobacteria	Micrococcales_3	Micrococcales_3_unclassified	Micrococcales_3_unclassified	0.0244559	0.0733676	0	0.0489117	0.0733676	0.0733676	0.0489117	0	0.29347	0.0733676	0.171191	0.0733676	0.635852	0.122279	0.0489117	0.403522	0.904867	1.90756	0.276487
70	Proteobacteria	Gammaproteobacteria_1	Enterobacteriales	Enterobacteriaceae	Enterobacteriaceae_unclassified	0.29347	0.220103	0.220103	0.29347	0.0978234	0.733676	0.391294	0.195647	0.183419	0.220103	0.220103	0.391294	0.269014	0.41575	0.220103	0.256787	0.244559	0.0733676	0.274449
72	Firmicutes	Clostridia_1	Clostridiales	Ruminococcaceae	Termite_cockroach_cluster	0.366838	0.0978234	0.29347	0.195647	0.391294	0.29347	0.171191	0.269014	0.220103	0.29347	0.489117	0.146735	0.317926	0.317926	0.220103	0.29347	0.317926	0.220103	0.27309
76	Firmicutes	Clostridia_1	Clostridiales	Lachnospiraceae	Gut_cluster_13	0.244559	0.342382	0.366838	0.0978234	0.244559	0.586941	0.29347	0.29347	0.220103	0.0978234	0.195647	0.342382	0.146735	0.0489117	0.171191	0.440205	0.366838	0.366838	0.270373
71	Bacteroidetes	Bacteroidia	Bacteroidales	Bacteroidales_unclassified	Bacteroidales_unclassified	0.146735	0.122279	0.183419	0.586941	0.269014	0.122279	0.366838	0.440205	0.220103	0.171191	0.269014	0.70922	0.342382	0.317926	0.269014	0.183419	0.0978234	0.0366838	0.269694
84	Firmicutes	Bacilli	Lactobacillales	Streptococcaceae	Streptococcaceae_unclassified	0	0	0	0.0489117	0	0	0.0244559	0.0489117	0.0733676	0.0733676	0.0244559	0.0733676	0.317926	1.00269	0.317926	1.39398	0.880411	0.550257	0.268335
73	Proteobacteria	Deltaproteobacteria	Desulfovibrionales	Desulfovibrionaceae	Gut_cluster_3	0.0978234	0.29347	0.256787	0.342382	0.440205	0.195647	0.366838	0.195647	0.220103	0.41575	0.220103	0.0978234	0.366838	0.146735	0.244559	0.183419	0.29347	0.403522	0.265618
75	Bacteroidetes	Bacteroidia	Bacteroidales	Porphyromonadaceae_Cluster_V	Termite_Cockroach_cluster	0.0733676	0.244559	0.0366838	0.146735	0.220103	0.269014	0.29347	0.195647	0.733676	0.195647	0.29347	0.317926	0.635852	0.122279	0.366838	0.0366838	0.317926	0.220103	0.262221
74	Actinobacteria	Actinobacteria	Actinomycetales	Termite_cluster_2	Termite_cluster_2_unclassified	0.391294	0.29347	0.29347	0.489117	0.317926	0.440205	0.317926	0.269014	0.146735	0.220103	0.269014	0.220103	0.0978234	0.195647	0.146735	0.256787	0.220103	0.110051	0.260862
79	Bacteroidetes	Bacteroidia	Bacteroidales	Porphyromonadaceae_Cluster_V	Porphyromonadaceae_Cluster_V_unclassified	0.146735	0.269014	0.330154	0.41575	0.41575	0.244559	0.366838	0.317926	0.476889	0.244559	0.269014	0.29347	0.171191	0.220103	0.220103	0.0366838	0.0978234	0.146735	0.260183
81	Firmicutes	Clostridia_1	Clostridiales	Family_XIII_Incertae_Sedis	Family_XIII_Incertae_Sedis_unclassified	0.171191	0.29347	0.440205	0.195647	0.195647	0.391294	0.146735	0.244559	0.220103	0.269014	0.391294	0.269014	0.195647	0.171191	0.391294	0.256787	0.171191	0.220103	0.257466
80	Planctomycetes	Planctomycetacia	Planctomycetales	Planctomycetaceae	Planctomycetaceae_unclassified	0.317926	0.122279	0.366838	0.220103	0.70922	0.29347	0.391294	0.0733676	0.146735	0.269014	0.489117	0.171191	0.171191	0	0.391294	0.0733676	0.122279	0.29347	0.256787
78	Bacteroidetes	Bacteroidia	Bacteroidales	Porphyromonadaceae_2	Termite_cluster_2	0.0733676	0.0978234	0.0733676	0.366838	0.195647	0.41575	0.440205	0.29347	0.256787	0.220103	0.0244559	0.29347	0.244559	0.391294	0.195647	0.476889	0.464661	0.0733676	0.255428
77	Bacteroidetes	Bacteroidia	Bacteroidales	Porphyromonadaceae_1	Dysgonomonas	0.122279	0.29347	0	0.29347	0.489117	0.269014	0.29347	0.464661	0.256787	0.29347	0.0733676	0.122279	0.0978234	0.122279	0.586941	0.29347	0.41575	0.0733676	0.25339
82	Synergistetes	Synergistia	Synergistales	Synergistaceae	Candidatus_Tammella	0.244559	0.122279	0.256787	0.366838	0.0978234	0.195647	0.0733676	0.342382	0.183419	0.0978234	0.317926	0.0489117	0.538029	0.733676	0.122279	0.146735	0.220103	0.366838	0.248635
86	Firmicutes	Clostridia_1	Clostridiales	Lachnospiraceae	Gut_cluster_13	0.171191	0.269014	0.366838	0.317926	0.244559	0.269014	0.146735	0.0733676	0.220103	0.0733676	0.317926	0.0978234	0.195647	0.29347	0.244559	0.366838	0.342382	0.403522	0.245238
83	Firmicutes	Clostridia_2	Clostridiales_1	Veillonellaceae	Uncultured_7	0.0489117	0.317926	0.146735	0.122279	0.220103	0.244559	0.195647	0.269014	0.220103	0.0733676	0.269014	0.195647	0.195647	0.366838	0.684764	0.330154	0.269014	0.220103	0.243879
88	Firmicutes	Clostridia_1	Clostridiales	Lachnospiraceae	Gut_cluster_13	0.244559	0.29347	0.220103	0.220103	0.195647	0.244559	0.146735	0.0733676	0.220103	0.195647	0.317926	0.0244559	0.269014	0.171191	0.391294	0.440205	0.440205	0.183419	0.238445
87	Firmicutes	Clostridia_1	Clostridiales	Ruminococcaceae	Gut_cluster_1	0.562485	0.317926	0.29347	0.269014	0.195647	0.366838	0.122279	0.122279	0.256787	0.269014	0.244559	0.171191	0.146735	0.146735	0.220103	0.110051	0.29347	0.146735	0.236407
90	Bacteroidetes	Bacteroidia	Bacteroidales	Porphyromonadaceae_Cluster_V	Cockroach_cluster	0	0.0978234	0	0.122279	0.146735	0.0978234	0.41575	0.146735	0.513573	0.29347	0.146735	0.122279	0.391294	0.195647	0.489117	0.366838	0.586941	0.110051	0.235727
91	Firmicutes	Clostridia_1	Clostridiales	Ruminococcaceae	Termite_cockroach_cluster	0.0733676	0.122279	0	0.0733676	0.29347	0.220103	0.244559	0.342382	0.29347	0.146735	0.244559	0.269014	0.122279	0.29347	0.29347	0.220103	0.513573	0.476889	0.235727
94	Firmicutes	Clostridia_1	Clostridiales	Lachnospiraceae	Gut_cluster_13	0.171191	0.171191	0.183419	0.41575	0.220103	0.366838	0.220103	0.171191	0.476889	0.122279	0.0978234	0.269014	0.122279	0.0978234	0.220103	0.29347	0.269014	0.330154	0.234369
89	Planctomycetes	Planctomycetacia	Planctomycetales	Planctomycetaceae	Planctomycetaceae_unclassified	0.244559	0.171191	0.29347	0.122279	0.464661	0.440205	0.29347	0.269014	0.183419	0.195647	0.0978234	0.269014	0.122279	0.440205	0.146735	0.0366838	0.0489117	0.366838	0.233689
95	Actinobacteria	Actinobacteria	Coriobacteriales	Coriobacteriaceae	Uncultured_10	0.29347	0.122279	0.330154	0.317926	0.342382	0.660308	0.146735	0.122279	0.183419	0.220103	0.29347	0.122279	0.146735	0.146735	0.171191	0.220103	0.0733676	0.183419	0.227575
92	Fusobacteria	Fusobacteria	Fusobacteriales	Fusobacteriaceae	Fusobacteriaceae_unclassified	0.0978234	0.171191	0.0733676	0.635852	0.171191	0.0733676	0.0733676	0.464661	0.220103	0.220103	0.220103	0.146735	0.342382	0.0733676	0.317926	0.29347	0.342382	0.146735	0.226896
93	Bacteroidetes	Bacteroidia	Bacteroidales	Porphyromonadaceae_Cluster_V	Termite_Cockroach_cluster	0.244559	0.29347	0.146735	0.244559	0.440205	0.391294	0.29347	0.244559	0.220103	0.171191	0.0978234	0.366838	0.122279	0.220103	0.220103	0.0733676	0.122279	0.110051	0.223499
97	Firmicutes	Clostridia_1	Clostridiales	Ruminococcaceae	Incertae_Sedis_5	0.146735	0.244559	0.146735	0.0244559	0.244559	0.220103	0.220103	0.122279	0.330154	0.244559	0.366838	0.195647	0.171191	0.171191	0.29347	0.183419	0.195647	0.256787	0.209913
98	Firmicutes	Clostridia_1	Clostridiales	Lachnospiraceae	Gut_cluster_13	0.0978234	0.0733676	0.146735	0.146735	0.0978234	0.0733676	0.0733676	0.0978234	0.330154	0.269014	0.244559	0.122279	0.171191	0.513573	0.366838	0.623624	0.146735	0.146735	0.207875
96	Bacteroidetes	Bacteroidia	Bacteroidales	Porphyromonadaceae_Cluster_V	Porphyromonadaceae_Cluster_V_unclassified	0.171191	0.317926	0.0366838	0.41575	0.122279	0.269014	0.29347	0.220103	0.366838	0.244559	0.0733676	0.220103	0.220103	0.195647	0.195647	0.146735	0.0978234	0.110051	0.206516
101	Firmicutes	Clostridia_1	Clostridiales	Ruminococcaceae	Uncultured_12	0.0733676	0.122279	0.110051	0.0244559	0.0978234	0.146735	0.146735	0.0733676	0.146735	0.342382	0.195647	0.122279	0.269014	0.29347	0.171191	0.256787	0.41575	0.586941	0.199723
99	Firmicutes	Clostridia_1	Clostridiales	Ruminococcaceae	Insect_cluster	0.146735	0.269014	0.0733676	0.366838	0.317926	0.0978234	0.146735	0.195647	0.29347	0.195647	0.122279	0.171191	0.317926	0.195647	0.195647	0.110051	0.122279	0.220103	0.197685
100	Bacteroidetes	Bacteroidia	Bacteroidales	Porphyromonadaceae_Cluster_V	Porphyromonadaceae_Cluster_V_unclassified	0.171191	0.195647	0.256787	0.146735	0.391294	0.513573	0.366838	0.0733676	0.330154	0.195647	0.0489117	0.41575	0.0978234	0.0489117	0.0733676	0	0.0733676	0.0733676	0.19293
102	Bacteroidetes	Bacteroidia	Bacteroidales	Bacteroidales_unclassified	Bacteroidales_unclassified	0.195647	0.0978234	0.220103	0.244559	0.0978234	0.0978234	0.317926	0.146735	0.330154	0.146735	0.0978234	0.29347	0.122279	0.342382	0.317926	0.110051	0.0978234	0.183419	0.19225
104	Firmicutes	Clostridia_1	Clostridiales	Ruminococcaceae	Ruminococcaceae_unclassified	0.195647	0.342382	0.146735	0.220103	0.220103	0.29347	0.146735	0.195647	0.403522	0.29347	0.220103	0.122279	0.0733676	0.0244559	0.146735	0.110051	0.0978234	0.146735	0.188854
103	Bacteroidetes	Bacteroidia	Bacteroidales	Porphyromonadaceae_3	Porphyromonadaceae_3_unclassified	0.0733676	0.146735	0.0733676	0.122279	0.122279	0	0.244559	0.244559	0.330154	0.171191	0.0978234	0.171191	0.122279	0	0.146735	0.146735	0.953778	0.220103	0.188174
106	Firmicutes	Clostridia_1	Clostridiales	Ruminococcaceae	Ruminococcaceae_unclassified	0	0.0244559	0	0.0733676	0.195647	0.195647	0.195647	0.0244559	0.366838	0.0733676	0.317926	0.317926	0.269014	0.269014	0.146735	0.0733676	0.29347	0.513573	0.186136
105	Firmicutes	Clostridia_1	Clostridiales	Ruminococcaceae	Anaerotruncus	0.146735	0.220103	0.146735	0.122279	0.122279	0.171191	0.220103	0.171191	0.110051	0.269014	0.146735	0.195647	0.269014	0.122279	0.244559	0.220103	0.195647	0.183419	0.18206
108	Bacteroidetes	Bacteroidia	Bacteroidales	Porphyromonadaceae_3	Porphyromonadaceae_3_unclassified	0.0978234	0.146735	0.330154	0.0733676	0.122279	0.244559	0.171191	0.122279	0.220103	0.317926	0.0244559	0.195647	0.244559	0.220103	0.195647	0.110051	0.269014	0.146735	0.180702
109	Firmicutes	Bacilli	Lactobacillales	Lactobacillales_unclassified	Lactobacillales_unclassified	0	0.195647	0.0366838	0.195647	0.0489117	0.146735	0.0978234	0.269014	0.183419	0.171191	0.269014	0.171191	0.146735	0.391294	0.195647	0.476889	0.122279	0.110051	0.179343
107	Firmicutes	Clostridia_1	Clostridiales	Ruminococcaceae	Insect_cluster	0.195647	0.342382	0.183419	0.244559	0.220103	0.220103	0.122279	0.122279	0.256787	0.195647	0.171191	0.220103	0.122279	0.0978234	0.195647	0.0366838	0.122279	0.146735	0.178664
114	Firmicutes	Bacilli	Lactobacillales	Leuconostocaceae	Weissella_1	0.0733676	0.220103	0	0.29347	0.0733676	0.122279	0.122279	0.562485	0	0.0244559	0.0489117	0	0.0733676	0.122279	0.146735	0.807043	0.244559	0.183419	0.173229
117	Bacteroidetes	Bacteroidia	Bacteroidales	Porphyromonadaceae_2	Termite_cluster_3	0.0244559	0.0733676	0	0.0733676	0.0244559	0.122279	0.122279	0.0978234	0.366838	0	0.171191	0.0489117	0.195647	0.342382	0.122279	0.476889	0.391294	0.440205	0.17187
111	Firmicutes	Bacilli	Lactobacillales	Lactobacillales_unclassified	Lactobacillales_unclassified	0.0244559	0.146735	0.220103	0.195647	0.0244559	0.0978234	0.122279	0.122279	0.183419	0.317926	0.171191	0.146735	0.171191	0.513573	0.171191	0.330154	0.122279	0	0.171191
115	Firmicutes	Firmicutes_unclassified	Firmicutes_unclassified	Firmicutes_unclassified	Firmicutes_unclassified	0.0733676	0	0.0366838	0.0489117	0.195647	0.0733676	0.171191	0.0489117	0.29347	0.171191	0.171191	0.342382	0.317926	0.244559	0.0978234	0.220103	0.220103	0.330154	0.169832
110	Bacteroidetes	Bacteroidia	Bacteroidales	Bacteroidaceae	Bacteroides	0.489117	0.538029	0.29347	0.244559	0.171191	0.366838	0.0733676	0.317926	0.0733676	0.146735	0.0489117	0.146735	0.0733676	0	0	0	0	0	0.165756
112	Bacteroidetes	Bacteroidia	Bacteroidales	Porphyromonadaceae_Cluster_V	Termite_Cockroach_cluster	0.489117	0.195647	0.29347	0.195647	0.366838	0.195647	0.122279	0.0978234	0.183419	0.0978234	0.0733676	0.29347	0.146735	0.0978234	0.0978234	0.0366838	0	0	0.165756
118	Bacteroidetes	Bacteroidia	Bacteroidales	Rikenellaceae	Rs-D38_termite_group	0.0489117	0.0733676	0.0733676	0.0978234	0.0978234	0.0733676	0.244559	0.0733676	0.330154	0.146735	0.146735	0.171191	0.195647	0.220103	0.391294	0.146735	0.146735	0.29347	0.165077
116	Proteobacteria	Deltaproteobacteria	Desulfovibrionales	Desulfovibrionaceae	Gut_cluster_3	0.0978234	0.0733676	0	0.0244559	0.269014	0.171191	0.195647	0.122279	0.403522	0.171191	0.391294	0.220103	0.146735	0.171191	0.146735	0.146735	0.0489117	0.146735	0.163718
113	Firmicutes	Clostridia_1	Clostridiales	Ruminococcaceae	Ruminococcaceae_unclassified	0.0978234	0.122279	0.146735	0.171191	0.244559	0.195647	0.122279	0.220103	0.110051	0.0978234	0.220103	0.146735	0.29347	0.171191	0.220103	0.0733676	0.146735	0.110051	0.16168
123	Bacteroidetes	Bacteroidia	Bacteroidales	Porphyromonadaceae_3	Cluster_IV	0	0	0	0.122279	0.0978234	0.0244559	0	0.0978234	0.183419	0.0244559	0.0244559	0.0489117	0.538029	0.269014	0.195647	0.403522	0.342382	0.513573	0.160322
119	Bacteroidetes	Bacteroidia	Bacteroidales	Rikenellaceae	Alisitpes_IV	0.171191	0.269014	0.183419	0.146735	0.171191	0.220103	0.317926	0.195647	0.183419	0.146735	0.171191	0.0978234	0.0978234	0.0978234	0.122279	0.110051	0.0244559	0.146735	0.159642
120	Bacteroidetes	Bacteroidia	Bacteroidales	Rikenellaceae	Rikenellaceae_unclassified	0.195647	0.122279	0.0733676	0.122279	0.220103	0.29347	0.146735	0.122279	0.220103	0.244559	0.146735	0.122279	0.0733676	0.146735	0.195647	0.146735	0.146735	0.0366838	0.154208
121	Firmicutes	Clostridia_1	Clostridiales	Eubacteriaceae_1	Eubacterium_1	0.0733676	0.0489117	0.256787	0.0978234	0.244559	0.220103	0.171191	0.342382	0	0.29347	0.195647	0.0244559	0.0978234	0.146735	0.195647	0.146735	0.0978234	0.0733676	0.15149
128	Planctomycetes	vadinHA49	Insect_cluster	Insect_cluster_unclassified	Insect_cluster_unclassified	0.122279	0.0489117	0.29347	0.171191	0.195647	0.171191	0.171191	0.0978234	0.146735	0.122279	0.146735	0.244559	0.0733676	0.0489117	0.0733676	0.146735	0.195647	0.256787	0.15149
127	Firmicutes	Clostridia_1	Clostridiales	Lachnospiraceae	Lachnospiraceae_unclassified	0.0244559	0.146735	0	0.0733676	0.0733676	0.0244559	0.0978234	0.0244559	0.0733676	0.366838	0.0489117	0.0244559	0.0978234	0.171191	0.391294	0.660308	0.366838	0.0366838	0.150132
126	Firmicutes	Firmicutes_unclassified	Firmicutes_unclassified	Firmicutes_unclassified	Firmicutes_unclassified	0.0733676	0.269014	0.29347	0.29347	0.0978234	0.220103	0.122279	0.195647	0.0366838	0.0978234	0.146735	0.146735	0.146735	0.0733676	0.0733676	0.146735	0.146735	0.0733676	0.147414
122	Firmicutes	Clostridia_1	Clostridiales	Ruminococcaceae	Ruminococcaceae_unclassified	0	0.122279	0	0.0978234	0.146735	0.146735	0.440205	0.244559	0.146735	0.244559	0.122279	0.0978234	0.146735	0.269014	0.244559	0	0.171191	0	0.146735
125	Synergistetes	Synergistia	Synergistales	Synergistaceae	Termite_cockroach_cluster	0.0978234	0.171191	0.0366838	0.146735	0.269014	0.195647	0.122279	0.0978234	0.146735	0.171191	0.366838	0.0489117	0.0489117	0.122279	0.0978234	0.366838	0.0244559	0.110051	0.146735
129	Firmicutes	Clostridia_1	Clostridiales	Ruminococcaceae	Termite_cockroach_cluster	0.195647	0.220103	0.256787	0.146735	0.342382	0.122279	0.122279	0.146735	0.183419	0.0978234	0.0489117	0.171191	0.0244559	0.0978234	0.122279	0.110051	0.0733676	0.146735	0.146056
133	Firmicutes	Firmicutes_unclassified	Firmicutes_unclassified	Firmicutes_unclassified	Firmicutes_unclassified	0	0.220103	0	0.0733676	0.0733676	0.0978234	0.0244559	0.220103	0.256787	0	0.0978234	0.0244559	0.0733676	0.122279	0.660308	0.403522	0.0733676	0.183419	0.144697
135	Firmicutes	Clostridia_1	Clostridiales	Lachnospiraceae	Lachnospiraceae_unclassified	0	0.0244559	0.0366838	0.0489117	0.195647	0.171191	0.0244559	0.0244559	0.366838	0.0733676	0.0733676	0.171191	0.146735	0.317926	0.171191	0.183419	0.220103	0.330154	0.143338
132	Firmicutes	Clostridia_1	Clostridiales	Lachnospiraceae	Catabacter	0.0489117	0.0733676	0.0366838	0.0244559	0.195647	0.0978234	0.0489117	0.0489117	0.220103	0.0978234	0.0733676	0.171191	0.195647	0.220103	0.146735	0.146735	0.440205	0.256787	0.141301
131	Firmicutes	Clostridia_1	Clostridiales	Lachnospiraceae	Gut_cluster_13	0.122279	0.171191	0.183419	0.195647	0.269014	0.122279	0.0978234	0.0733676	0.29347	0.171191	0.171191	0.269014	0.0733676	0.171191	0.0978234	0	0.0489117	0	0.140621
124	Firmicutes	Clostridia_1	Clostridiales	Lachnospiraceae	Lachnospiraceae_unclassified	0.0978234	0.0978234	0.0366838	0.489117	0.146735	0.0244559	0.171191	0.70922	0	0.0244559	0.0244559	0.0489117	0.122279	0.146735	0.317926	0.0366838	0.0244559	0	0.139942
130	Bacteroidetes	Bacteroidia	Bacteroidales	Porphyromonadaceae_3	Cluster_IV	0.0978234	0.171191	0	0.0978234	0.0489117	0.122279	0.244559	0.195647	0.0733676	0.0978234	0	0.0489117	0.122279	0.244559	0.269014	0.256787	0.29347	0.110051	0.138583
134	Firmicutes	Clostridia_1	Clostridiales	Lachnospiraceae	Catabacter	0.244559	0.220103	0.146735	0.146735	0.171191	0.171191	0.122279	0.146735	0.183419	0.146735	0.0733676	0.122279	0.0733676	0.146735	0.171191	0	0.0489117	0.110051	0.135866
136	Planctomycetes	vadinHA49	Insect_cluster	Insect_cluster_unclassified	Insect_cluster_unclassified	0.195647	0.146735	0.110051	0.0978234	0.244559	0.0978234	0.122279	0.0244559	0.0733676	0.0978234	0.220103	0.0978234	0.122279	0.171191	0.171191	0.110051	0.146735	0.183419	0.135187
138	Proteobacteria	Deltaproteobacteria	Desulfovibrionales	Desulfovibrionaceae	Gut_cluster_3	0.244559	0.122279	0.220103	0.122279	0.171191	0.0733676	0.146735	0.195647	0.220103	0.0489117	0.0489117	0.0978234	0.0489117	0.122279	0.220103	0.183419	0.0733676	0.0733676	0.135187
137	Proteobacteria	Deltaproteobacteria	Desulfovibrionales	Desulfovibrionaceae	Gut_cluster_3	0.195647	0.195647	0.0733676	0.0489117	0.122279	0.171191	0.171191	0.244559	0.146735	0.0244559	0.0978234	0.146735	0.195647	0.0489117	0.171191	0.110051	0.0978234	0.110051	0.13179
140	Firmicutes	Clostridia_2	Clostridiales_1	Peptococcaceae_1	Peptococcaceae_1_unclassified	0.195647	0.195647	0.0366838	0.0733676	0.171191	0.146735	0.122279	0.220103	0.183419	0.146735	0.244559	0.0978234	0.0733676	0.0978234	0.0489117	0	0.0733676	0.146735	0.126355
143	Firmicutes	Clostridia_1	Clostridiales	Lachnospiraceae	Gut_cluster_13	0.195647	0.0489117	0.220103	0.146735	0.0978234	0.0489117	0.195647	0.0733676	0.0733676	0.122279	0.0244559	0.0733676	0.0978234	0.220103	0.0733676	0.146735	0.220103	0.183419	0.125676
139	Synergistetes	Synergistia	Synergistales	Synergistaceae	Candidatus_Tammella	0	0.0733676	0.183419	0.146735	0.0244559	0.171191	0.0489117	0.0489117	0.110051	0.0489117	0.538029	0.0244559	0.0244559	0.0244559	0.611396	0	0.171191	0	0.124997
142	Bacteroidetes	Bacteroidia	Bacteroidales	Porphyromonadaceae_3	Porphyromonadaceae_3_unclassified	0.244559	0.391294	0.0733676	0.122279	0.29347	0.0733676	0.122279	0.171191	0.366838	0.0978234	0.0244559	0.122279	0	0.0733676	0	0.0366838	0	0	0.122959
146	Bacteroidetes	Bacteroidia	Bacteroidales	Porphyromonadaceae_Gut_group	Mixed_gut_cluster	0.0733676	0.0244559	0.110051	0.0489117	0.122279	0.0978234	0.269014	0.0489117	0.0733676	0	0.122279	0.122279	0.220103	0.171191	0.0489117	0.110051	0.195647	0.330154	0.1216
141	Bacteroidetes	Bacteroidia	Bacteroidales	Rikenellaceae	gut_cluster_c	0.122279	0.146735	0.0366838	0.220103	0.122279	0.171191	0.0733676	0.464661	0.110051	0.0978234	0.0244559	0.0978234	0.0489117	0.146735	0.0733676	0	0.220103	0	0.120921
156	Bacteroidetes	Bacteroidia	Bacteroidales	Porphyromonadaceae_3	Cluster_IV	0	0	0	0	0	0	0	0	0	0	0	0	0.122279	0.0733676	0.0489117	0.366838	0.41575	1.1372	0.120241
144	Planctomycetes	Planctomycetacia	Planctomycetales	Planctomycetaceae	Termite_cockroach_cluster_2	0.220103	0.0978234	0.0733676	0.0733676	0.195647	0.0489117	0.171191	0.0489117	0.0366838	0.0978234	0.146735	0.122279	0.171191	0.171191	0.146735	0.0366838	0.220103	0.0366838	0.117524
145	Firmicutes	Clostridia_1	Clostridiales	Clostridiales_unclassified	Clostridiales_unclassified	0.464661	0.0978234	0.110051	0.0244559	0.122279	0.146735	0.0733676	0.366838	0.0733676	0.317926	0.146735	0.0733676	0	0.0489117	0	0	0	0	0.114807
150	Proteobacteria	Alphaproteobacteria	Rhizobiales_1	Brucellaceae	Ochrobactrum_1	0	0	0	0.0244559	0	0.0733676	0	0.0489117	0.256787	0.0733676	0.904867	0	0.0978234	0.146735	0.0244559	0.146735	0.122279	0.146735	0.114807
149	Firmicutes	Clostridia_1	Clostridiales	Ruminococcaceae	Ruminococcaceae_unclassified	0.0489117	0	0.0366838	0.0244559	0.122279	0.146735	0.0978234	0.0733676	0.0733676	0.0978234	0.195647	0.0489117	0.171191	0.171191	0.0978234	0.29347	0.220103	0.146735	0.114807
148	Firmicutes	Clostridia_1	Clostridiales	Clostridiales_unclassified	Clostridiales_unclassified	0.171191	0.0489117	0.220103	0.0244559	0.122279	0.0244559	0.146735	0.122279	0	0.122279	0.0733676	0.146735	0.0489117	0.244559	0.244559	0.0733676	0.0733676	0.146735	0.114127
147	Bacteroidetes	Bacteroidia	Bacteroidales	Porphyromonadaceae_Cluster_V	Termite_Cockroach_cluster	0.171191	0.0978234	0.0366838	0.146735	0.220103	0.122279	0.0978234	0.0733676	0.146735	0.0733676	0.195647	0.0978234	0.0978234	0.0733676	0.342382	0	0	0.0366838	0.112769
152	Firmicutes	Clostridia_1	Clostridiales	Family_XIII_Incertae_Sedis	Family_XIII_Incertae_Sedis_unclassified	0.0733676	0.146735	0.110051	0.0244559	0.0733676	0.122279	0.0978234	0.0489117	0.0733676	0.171191	0.0733676	0.0978234	0.220103	0.0733676	0.0978234	0.256787	0.146735	0.0733676	0.110051
151	Bacteroidetes	Bacteroidia	Bacteroidales	Rikenellaceae	Alisitpes_IV	0.220103	0.0978234	0.110051	0.146735	0.146735	0.0489117	0.0733676	0.146735	0.0366838	0.122279	0.0244559	0.0489117	0.122279	0.0733676	0.122279	0.0733676	0.146735	0.183419	0.108013
154	Bacteroidetes	Bacteroidia	Bacteroidales	Bacteroidales_unclassified	Bacteroidales_unclassified	0.0489117	0.195647	0	0.440205	0.0244559	0.0489117	0.0978234	0.0733676	0.256787	0.0978234	0	0.0978234	0.0244559	0.122279	0.0489117	0.110051	0.122279	0.110051	0.106655
155	Firmicutes	Firmicutes_unclassified	Firmicutes_unclassified	Firmicutes_unclassified	Firmicutes_unclassified	0.269014	0.146735	0.0366838	0.122279	0.122279	0.0489117	0.0978234	0.0244559	0.29347	0	0.146735	0.171191	0.0244559	0.0978234	0.0244559	0.146735	0.122279	0	0.105296
153	Proteobacteria	Deltaproteobacteria	Desulfovibrionales	Desulfovibrionaceae	Gut_cluster_3	0.122279	0	0.0733676	0.0244559	0.0733676	0.0978234	0.317926	0	0.183419	0.122279	0.122279	0.146735	0.122279	0.0244559	0.146735	0.110051	0.0978234	0.110051	0.105296
158	Firmicutes	Clostridia_1	Clostridiales	Clostridiales_unclassified	Clostridiales_unclassified	0.0978234	0.171191	0.0733676	0.0489117	0.122279	0.0978234	0.0733676	0.0733676	0.0366838	0.0489117	0.122279	0.0244559	0.220103	0.0489117	0.0733676	0.110051	0.122279	0.256787	0.10122
161	Spirochaetes	Spirochaetes	Spirochaetales	Spirochaetaceae	Spirochaeta	0.195647	0.122279	0.366838	0.146735	0.171191	0.0244559	0.0489117	0.146735	0.0733676	0.146735	0.0489117	0.171191	0.0733676	0.0244559	0	0	0.0244559	0.0366838	0.10122
157	Bacteroidetes	Bacteroidia	Bacteroidales	Rikenellaceae	Rikenellaceae_unclassified	0.220103	0.0733676	0.0366838	0.0733676	0.244559	0.122279	0.146735	0.0244559	0.183419	0.146735	0.0978234	0.0733676	0.122279	0.0978234	0.0733676	0.0366838	0.0244559	0	0.0998614
160	Firmicutes	Clostridia_1	Clostridiales	Ruminococcaceae	Ruminococcaceae_unclassified	0.0733676	0.0244559	0.0366838	0	0.0978234	0.0978234	0.0489117	0.0489117	0.0366838	0.122279	0.122279	0.0978234	0.244559	0.317926	0.0733676	0.220103	0.0244559	0.110051	0.0998614
163	Firmicutes	Clostridia_1	Clostridiales	Ruminococcaceae	Ruminococcaceae_unclassified	0.0489117	0	0	0	0.366838	0	0.0733676	0.0244559	0.29347	0.342382	0.0244559	0.171191	0.0733676	0.0489117	0.0978234	0.0366838	0.0733676	0.0733676	0.0971441
166	Bacteroidetes	Bacteroidia	Bacteroidales	Porphyromonadaceae_Cluster_V	Porphyromonadaceae_Cluster_V_unclassified	0.0244559	0.0244559	0	0.0978234	0.0489117	0.0733676	0.0244559	0.0489117	0.220103	0.0489117	0.0978234	0.0733676	0.171191	0.195647	0.195647	0.0733676	0.0978234	0.220103	0.0964648
159	Firmicutes	Clostridia_1	Clostridiales	Ruminococcaceae	Insect_cluster	0.195647	0.171191	0.0366838	0.0978234	0.0733676	0.0733676	0.0733676	0.122279	0.110051	0.0733676	0.0978234	0.244559	0.146735	0.0733676	0.0244559	0	0	0.110051	0.0957854
167	Bacteroidetes	Bacteroidia	Bacteroidales	Rikenellaceae	Alistipes_III	0.171191	0.171191	0.256787	0.0978234	0.0489117	0.220103	0.0978234	0.0489117	0.0366838	0.0489117	0.0978234	0.146735	0.0244559	0.0244559	0.0489117	0.0733676	0.0244559	0.0733676	0.0951061
162	Firmicutes	Clostridia_1	Clostridiales	Ruminococcaceae	Insect_cluster	0.146735	0.220103	0.183419	0.0733676	0.0489117	0.171191	0.0733676	0.122279	0	0.0733676	0.0489117	0.122279	0.0489117	0.171191	0.0489117	0.0366838	0.0978234	0	0.0937475
165	Proteobacteria	Deltaproteobacteria	Desulfovibrionales	Desulfovibrionaceae	Gut_cluster_3	0.0978234	0.0733676	0	0.171191	0.0489117	0.0244559	0.244559	0.0978234	0.0733676	0.0978234	0.146735	0.146735	0.122279	0.0244559	0.0733676	0.110051	0.0733676	0.0366838	0.0923888
172	Firmicutes	Clostridia_1	Clostridiales	Lachnospiraceae	Candidatus_Arthromitus	0.0978234	0.0244559	0.0733676	0.0489117	0.0978234	0.122279	0.0244559	0.171191	0.110051	0.0733676	0.0244559	0.0489117	0.146735	0.0733676	0	0.110051	0.146735	0.256787	0.0917095
164	Planctomycetes	Planctomycetacia	Planctomycetales	Planctomycetaceae	Planctomycetaceae_unclassified	0.122279	0.122279	0	0.171191	0.146735	0.146735	0.0244559	0.0489117	0	0.0244559	0.122279	0.122279	0.0978234	0.146735	0.146735	0.0366838	0.0733676	0.0733676	0.0903508
168	Synergistetes	Synergistia	Synergistales	Synergistaceae	Candidatus_Tammella	0.122279	0.0978234	0.110051	0.0489117	0.0978234	0.0978234	0.122279	0.122279	0.0366838	0.0978234	0.0733676	0.0733676	0.122279	0.171191	0.0244559	0	0.0978234	0.110051	0.0903508
169	Bacteroidetes	Bacteroidia	Bacteroidales	Bacteroidales_unclassified	Bacteroidales_unclassified	0.122279	0.0978234	0.0366838	0.0489117	0.0978234	0.0978234	0.195647	0.342382	0.220103	0.0733676	0	0.146735	0	0	0.0244559	0.0366838	0.0489117	0	0.0883128
170	Firmicutes	Clostridia_1	Clostridiales	Lachnospiraceae	Gut_cluster_15	0.122279	0.195647	0.0733676	0.0489117	0.0489117	0.0489117	0.146735	0.0978234	0.110051	0.171191	0.0978234	0.0244559	0.0244559	0.0489117	0.220103	0	0	0.110051	0.0883128
173	Firmicutes	Clostridia_1	Clostridiales	Ruminococcaceae	Uncultured_24	0.0489117	0.146735	0.146735	0.0733676	0.0978234	0.0978234	0.0489117	0.0978234	0.110051	0.0733676	0.195647	0.171191	0.0489117	0.0489117	0.0733676	0.0366838	0.0244559	0.0366838	0.0876335
171	Bacteroidetes	Bacteroidia	Bacteroidales	Bacteroidaceae	Bacteroides	0.269014	0.0244559	0.110051	0.122279	0.146735	0.0978234	0.220103	0	0.183419	0.122279	0.0244559	0.122279	0	0.122279	0	0	0	0	0.0869542
177	Proteobacteria	Deltaproteobacteria	Desulfobacterales	Desulfobacteraceae	Desulfatiferula	0.0733676	0	0.220103	0.0978234	0.0489117	0.0978234	0.171191	0.0978234	0.110051	0.0733676	0.0244559	0.0733676	0.0978234	0.0489117	0.0244559	0.110051	0.122279	0.0733676	0.0869542
178	Bacteroidetes	Bacteroidia	Bacteroidales	Bacteroidales_unclassified	Bacteroidales_unclassified	0.0733676	0.0489117	0.256787	0.146735	0.0978234	0.0733676	0.0489117	0.171191	0.110051	0.0244559	0.171191	0.0244559	0.0733676	0	0.0489117	0.0733676	0.0244559	0.0733676	0.0855955
174	Firmicutes	Bacilli	Lactobacillales	Enterococcaceae	Enterococcaceae_unclassified	0.0489117	0.146735	0.0366838	0.146735	0.0244559	0.0733676	0.0489117	0.0489117	0.0366838	0.122279	0.122279	0	0.146735	0.220103	0.0733676	0.0733676	0.0733676	0.0733676	0.0842368
176	Actinobacteria	Actinobacteria	Coriobacteriales	Coriobacteriaceae	Uncultured_10	0.0244559	0.0733676	0.256787	0.0489117	0.0733676	0.146735	0	0.0244559	0.0733676	0.171191	0.0978234	0.195647	0.0978234	0	0.0978234	0.0733676	0.0489117	0	0.0835575
175	Planctomycetes	Planctomycetacia	Planctomycetales	Planctomycetaceae	Planctomycetaceae_unclassified	0.0733676	0.0244559	0.110051	0.0244559	0.195647	0.195647	0.122279	0.0733676	0.183419	0.146735	0.0489117	0.0978234	0.0489117	0.0244559	0.122279	0	0	0	0.0828782
181	Firmicutes	Clostridia_1	Clostridiales	Ruminococcaceae	Gut_cluster_4	0.0489117	0.0489117	0.330154	0.0733676	0.0733676	0.0978234	0.195647	0	0.110051	0.0489117	0.0978234	0.0489117	0.0244559	0.122279	0.122279	0	0.0244559	0	0.0815195
179	Firmicutes	Firmicutes_unclassified	Firmicutes_unclassified	Firmicutes_unclassified	Firmicutes_unclassified	0.0978234	0.220103	0.146735	0.146735	0.0733676	0.0733676	0.0733676	0.0733676	0.146735	0.0978234	0.0244559	0.0244559	0.0978234	0.0978234	0	0	0.0489117	0	0.0801609
184	Bacteroidetes	Bacteroidia	Bacteroidales	Porphyromonadaceae_1	Dysgonomonas	0	0.0244559	0	0.0733676	0.0244559	0	0	0.146735	0.110051	0.0978234	0	0.0244559	0.122279	0.220103	0.146735	0.29347	0.146735	0	0.0794815
185	Bacteroidetes	Bacteroidia	Bacteroidales	Porphyromonadaceae_1	Dysgonomonas	0.0244559	0.0733676	0.110051	0.0489117	0.0489117	0.0978234	0.0733676	0.122279	0.0733676	0.122279	0.0733676	0.0489117	0.0244559	0.0489117	0.0978234	0.146735	0.146735	0.0366838	0.0788022
186	Proteobacteria	Deltaproteobacteria	Desulfobacterales	Desulfobulbaceae	Desulfobulbus	0.0489117	0.0489117	0.0733676	0.0978234	0.0733676	0.0733676	0.146735	0.0733676	0.146735	0.0978234	0.0489117	0.0244559	0.122279	0.0244559	0.0489117	0	0.122279	0.146735	0.0788022
182	Firmicutes	Clostridia_1	Clostridiales	Ruminococcaceae	Uncultured_28	0.122279	0.171191	0.0366838	0.0489117	0.122279	0.0978234	0.146735	0.0244559	0	0.0489117	0.0244559	0.171191	0.0489117	0.0489117	0	0.0733676	0.0489117	0.146735	0.0767642
180	Firmicutes	Clostridia_1	Clostridiales	Lachnospiraceae	Candidatus_Arthromitus	0.0244559	0.0489117	0	0.146735	0.0733676	0.0244559	0.0978234	0.146735	0.110051	0.220103	0.0489117	0.0733676	0	0.244559	0.0733676	0	0	0.0366838	0.0760849
187	Proteobacteria	Deltaproteobacteria	Desulfobacterales	Desulfobacteraceae	Desulfobacteraceae_unclassified	0.171191	0.0733676	0.0366838	0.146735	0.0489117	0.122279	0.0244559	0.0244559	0.0366838	0.0733676	0.0978234	0.122279	0.0733676	0.0489117	0	0.110051	0.0489117	0.110051	0.0760849
183	Proteobacteria	Deltaproteobacteria	Desulfovibrionales	Desulfovibrionaceae	Gut_cluster_3	0.0489117	0.122279	0.0366838	0.0733676	0.0978234	0.0489117	0.122279	0	0.0733676	0.0733676	0.0244559	0.0733676	0.122279	0.220103	0.122279	0.0366838	0.0244559	0.0366838	0.0754056
189	Bacteroidetes	Bacteroidia	Bacteroidales	Rikenellaceae	Alisitpes_IV	0.146735	0.0733676	0.183419	0.0978234	0.0978234	0.171191	0.0244559	0.0978234	0	0.0978234	0.0978234	0.0489117	0.0244559	0	0.0244559	0.0366838	0.0244559	0.110051	0.0754056
188	Bacteroidetes	Bacteroidia	Bacteroidales	Porphyromonadaceae_Cluster_V	Porphyromonadaceae_Cluster_V_unclassified	0.244559	0.122279	0.220103	0.146735	0	0	0.171191	0	0.0733676	0.0733676	0.0489117	0.0733676	0.0733676	0	0.0244559	0.0366838	0.0244559	0	0.0740469
193	Proteobacteria	Deltaproteobacteria	Desulfovibrionales	Desulfovibrionaceae	Gut_cluster_3	0.0978234	0.0489117	0.0733676	0.0489117	0.0489117	0.0733676	0.0978234	0.0489117	0.0733676	0.0489117	0.146735	0.0978234	0.0244559	0.0489117	0.0978234	0.110051	0.0489117	0.0733676	0.0726882
192	Firmicutes	Clostridia_1	Clostridiales	Ruminococcaceae	Termite_cockroach_cluster	0.0733676	0.0489117	0.146735	0	0.0978234	0.146735	0.0978234	0.0244559	0.0366838	0.0733676	0.0733676	0.0489117	0.0244559	0.0978234	0.0978234	0.110051	0.0733676	0.0366838	0.0726882
196	Proteobacteria	Alphaproteobacteria	Sphingomonadales	Sphingomonadaceae	Sphingomonadaceae_unclassified	0.342382	0.0244559	0.366838	0.0733676	0	0.0733676	0.0733676	0.0489117	0	0.0244559	0.0244559	0.0489117	0.146735	0.0244559	0	0	0.0244559	0	0.0720089
190	Firmicutes	Clostridia_1	Clostridiales	Ruminococcaceae	Ruminococcaceae_unclassified	0	0.122279	0.0366838	0.244559	0.122279	0.0489117	0.0489117	0.244559	0.110051	0.0489117	0.0244559	0.0244559	0.0978234	0.0489117	0.0489117	0	0	0	0.0706503
195	Firmicutes	Clostridia_1	Clostridiales	Ruminococcaceae	Ruminococcaceae_unclassified	0.171191	0.122279	0	0.0978234	0.0733676	0	0.0489117	0.0733676	0.29347	0.146735	0	0.146735	0	0.0733676	0.0244559	0	0	0	0.0706503
191	Firmicutes	Clostridia_1	Clostridiales	Clostridiales_unclassified	Clostridiales_unclassified	0.513573	0.171191	0.0733676	0.0244559	0.0489117	0.122279	0	0.0244559	0.0733676	0.0978234	0.0244559	0.0489117	0.0244559	0	0	0	0	0	0.0692916
197	Proteobacteria	Deltaproteobacteria	Desulfovibrionales	Desulfovibrionaceae	Termite_cluster_III	0.0733676	0.0978234	0.110051	0.0489117	0	0.0244559	0.171191	0.122279	0.110051	0.0733676	0.0489117	0.122279	0.0244559	0.0244559	0.122279	0	0.0733676	0	0.0692916
200	Firmicutes	Clostridia_1	Clostridiales	Lachnospiraceae	Gut_cluster_13	0.122279	0.171191	0.0733676	0.0244559	0.0244559	0.146735	0.0489117	0	0.0733676	0.0978234	0.0733676	0.0978234	0.0244559	0.0244559	0.0244559	0.0733676	0.0733676	0.0733676	0.0692916
194	Firmicutes	Clostridia_1	Clostridiales	Ruminococcaceae	Ruminococcaceae_unclassified	0.0244559	0	0.110051	0.0489117	0.0489117	0.0978234	0.195647	0.0733676	0.0366838	0.0733676	0.122279	0.0244559	0.0489117	0.0244559	0.0489117	0.110051	0.122279	0.0366838	0.0692916
198	Bacteroidetes	Bacteroidia	Bacteroidales	Porphyromonadaceae_3	Cluster_IV	0.0244559	0	0.146735	0.0489117	0	0.0489117	0.0489117	0.0978234	0.110051	0.0244559	0.0244559	0.0733676	0.195647	0.0244559	0.146735	0	0.122279	0.110051	0.0692916
201	Proteobacteria	Deltaproteobacteria	Desulfovibrionales	Desulfovibrionaceae	Desulfovibrionaceae_unclassified	0.0489117	0.0489117	0.0733676	0.0733676	0.122279	0.0978234	0.0733676	0.0978234	0.0733676	0.0244559	0.122279	0.0489117	0.0489117	0.0489117	0.122279	0.0366838	0.0244559	0.0366838	0.0679329
202	Firmicutes	Clostridia_1	Clostridiales	Lachnospiraceae	Lachnospiraceae_unclassified	0	0.0244559	0.0733676	0	0.146735	0.0489117	0.0489117	0.0489117	0	0.220103	0	0.146735	0.0489117	0.0489117	0.122279	0.146735	0.0244559	0.0733676	0.0679329
205	Firmicutes	Clostridia_1	Clostridiales	Lachnospiraceae	Gut_cluster_13	0.171191	0.0733676	0.110051	0.0489117	0.0733676	0.0733676	0	0.0244559	0.146735	0.0244559	0.0489117	0.0489117	0.0489117	0.0978234	0.0244559	0.110051	0.0244559	0.0366838	0.0658949
203	Actinobacteria	Actinobacteria	Corynebacteriales	Corynebacteriaceae	Corynebacteriaceae_unclassified	0.0978234	0	0	0	0	0.146735	0.0489117	0	0	0.146735	0.0733676	0.0244559	0.220103	0.0489117	0.0489117	0.0733676	0.0978234	0.146735	0.0652156
208	Bacteroidetes	Bacteroidia	Bacteroidales	Rikenellaceae	Rikenellaceae_unclassified	0.0244559	0.0489117	0	0.0244559	0.0978234	0.0489117	0.0978234	0	0.0366838	0.0489117	0.0244559	0.0244559	0.171191	0.0733676	0.0489117	0.146735	0.0733676	0.183419	0.0652156
199	Bacteroidetes	Bacteroidia	Bacteroidales	Rikenellaceae	Alisitpes_IV	0.0489117	0.0489117	0	0.195647	0.0733676	0.0978234	0.0489117	0.122279	0.0366838	0.0489117	0.0489117	0.0733676	0.0978234	0.0244559	0.122279	0	0.0733676	0	0.0645363
206	Firmicutes	Clostridia_1	Clostridiales	Lachnospiraceae	Lachnospiraceae_unclassified	0.0733676	0.0244559	0	0.0489117	0.0489117	0.0489117	0.0489117	0.0489117	0.0366838	0.0489117	0.146735	0.0978234	0.0733676	0.0733676	0.0489117	0.0733676	0.0733676	0.146735	0.0645363
204	Bacteroidetes	Bacteroidia	Bacteroidales	Porphyromonadaceae_3	Porphyromonadaceae_3_unclassified	0.0733676	0.0489117	0.0366838	0.171191	0.171191	0.0244559	0.0978234	0.0244559	0.0366838	0.0244559	0.0489117	0.0244559	0.0733676	0.0489117	0.0733676	0.0366838	0.0978234	0.0366838	0.063857
211	Proteobacteria	Deltaproteobacteria	Desulfarculales	Desulfarculaceae	Desulfarculus	0.0489117	0.122279	0.0733676	0.0489117	0.0733676	0.122279	0.0978234	0.0244559	0.146735	0.0244559	0.0244559	0.0733676	0.0244559	0.0489117	0.0733676	0	0.0489117	0.0733676	0.063857
209	Firmicutes	Clostridia_1	Clostridiales	Ruminococcaceae	Termite_cockroach_cluster	0.0244559	0.171191	0.0733676	0.0489117	0.146735	0	0	0.0733676	0.110051	0.0978234	0.0244559	0.0244559	0.0978234	0.0733676	0.0733676	0.0366838	0.0244559	0.0366838	0.0631776
207	Firmicutes	Clostridia_1	Clostridiales	Ruminococcaceae	Insect_cluster	0.122279	0.0733676	0.0733676	0.0733676	0.0733676	0.122279	0.0489117	0.0489117	0.0366838	0.0733676	0.122279	0	0.0489117	0	0.122279	0	0.0733676	0	0.061819
222	Bacteroidetes	Bacteroidia	Bacteroidales	Porphyromonadaceae_1	Dysgonomonas	0	0.0244559	0	0.0489117	0	0	0.0244559	0.0489117	0.146735	0	0.0489117	0.0733676	0.0489117	0.0733676	0.0978234	0.146735	0.146735	0.183419	0.061819
213	Firmicutes	Clostridia_2	Clostridiales	Syntrophomonadaceae	Syntrophomonadaceae_unclassified	0.0978234	0.171191	0.110051	0.0733676	0.122279	0	0.122279	0.0733676	0.110051	0.0489117	0.0244559	0.0489117	0	0.0733676	0	0	0.0244559	0	0.0611396
221	Bacteroidetes	Bacteroidia	Bacteroidales	Porphyromonadaceae_1	Dysgonomonas	0.0244559	0.0244559	0.0366838	0.0244559	0.0489117	0.0244559	0.122279	0.122279	0	0	0.0489117	0.0489117	0.0733676	0.0244559	0.0733676	0.146735	0.0244559	0.220103	0.0604603
229	Bacteroidetes	Bacteroidia	Bacteroidales	Porphyromonadaceae_Cluster_V	Porphyromonadaceae_Cluster_V_unclassified	0	0.0244559	0	0	0.0244559	0	0.0244559	0.0244559	0.330154	0.0489117	0.0489117	0.0978234	0.0978234	0.122279	0.0489117	0	0	0.183419	0.059781
212	Firmicutes	Clostridia_1	Clostridiales	Ruminococcaceae	Ruminococcaceae_unclassified	0.0733676	0.0489117	0	0	0	0.195647	0.0733676	0.0244559	0.0366838	0.0489117	0.195647	0.0489117	0.0244559	0.0978234	0.122279	0.0366838	0	0.0366838	0.0591017
210	Fusobacteria	Fusobacteria	Fusobacteriales	Fusobacteriaceae	Fusobacterium_1	0	0	0	0.0244559	0	0.0244559	0	0.317926	0.110051	0.0733676	0.0489117	0.0244559	0.146735	0.0733676	0.122279	0.0366838	0.0244559	0.0366838	0.0591017
219	Bacteroidetes	Bacteroidetes_unclassified	Bacteroidetes_unclassified	Bacteroidetes_unclassified	Bacteroidetes_unclassified	0.122279	0	0.0366838	0	0.0244559	0.0489117	0.0489117	0.0978234	0.0366838	0	0	0.146735	0.122279	0.0978234	0	0.0733676	0.0489117	0.146735	0.0584223
214	Planctomycetes	vadinHA49	Insect_cluster	Insect_cluster_unclassified	Insect_cluster_unclassified	0.0244559	0.0244559	0	0.0244559	0.0489117	0.0733676	0.0733676	0.0978234	0.0366838	0.122279	0.0489117	0.122279	0	0.0244559	0.195647	0	0.0489117	0.0733676	0.057743
216	Firmicutes	Clostridia_1	Clostridiales	Ruminococcaceae	Ruminococcaceae_unclassified	0.195647	0.171191	0.0733676	0.0978234	0.0489117	0.122279	0.0244559	0.0489117	0.0366838	0	0.0489117	0.0489117	0.0244559	0	0.0244559	0.0366838	0	0.0366838	0.057743
218	Proteobacteria	Deltaproteobacteria	Rs-K70	Insect_cluster	Insect_cluster_unclassified	0.0244559	0	0.0366838	0	0.146735	0.0244559	0.0733676	0	0.110051	0.0489117	0.122279	0.0733676	0.0733676	0.0733676	0.0244559	0	0.171191	0.0366838	0.057743
215	Firmicutes	Clostridia_1	Clostridiales	Ruminococcaceae	Insect_cluster	0.0733676	0	0.110051	0.0489117	0.171191	0.0733676	0.122279	0.0489117	0	0.0244559	0.0489117	0.0244559	0.0733676	0.0733676	0	0.0366838	0.0733676	0.0366838	0.057743
228	Firmicutes	Clostridia_1	Clostridiales	Ruminococcaceae	Ruminococcaceae_unclassified	0.0733676	0.0733676	0.0366838	0.146735	0.0489117	0.0489117	0.122279	0.0244559	0.110051	0.0244559	0.0244559	0.0489117	0	0.0244559	0.0489117	0.0733676	0	0.110051	0.057743
217	Proteobacteria	Betaproteobacteria	Burkholderiales	Comamonadaceae	Uncultured_25	0.0489117	0.0244559	0.0366838	0	0	0.0244559	0.0978234	0.0733676	0.0733676	0.0733676	0.0733676	0.0244559	0.122279	0.0733676	0.146735	0.0366838	0.0978234	0	0.0570637
226	Bacteroidetes	Bacteroidia	Bacteroidales	Porphyromonadaceae_2	Termite_cluster_3	0.0489117	0.0733676	0.110051	0.0244559	0.0733676	0.0733676	0.0489117	0.0733676	0.0733676	0	0	0.195647	0.0244559	0.0489117	0.0244559	0.0733676	0.0244559	0.0366838	0.0570637
224	Firmicutes	Clostridia_1	Clostridiales	Ruminococcaceae	Gut_cluster_1	0	0.0733676	0	0.0244559	0.0978234	0.0733676	0.0489117	0.0244559	0.0733676	0.0489117	0.146735	0	0.122279	0.0978234	0.0244559	0.0366838	0.0489117	0.0733676	0.0563843
220	Bacteroidetes	Bacteroidia	Bacteroidales	Bacteroidaceae	Bacteroides	0	0	0.0366838	0.0244559	0.0733676	0.146735	0.122279	0.0733676	0.110051	0.0489117	0.0244559	0	0.0244559	0.146735	0.122279	0	0.0244559	0.0366838	0.0563843
227	Elusimicrobia	Elusimicrobia	Elusimicrobiales	Lineage_III	Lineage_III_unclassified	0.0489117	0.0244559	0.0366838	0.0489117	0	0.0244559	0.0489117	0	0.0366838	0.0489117	0.0244559	0.0733676	0.171191	0.195647	0	0.0733676	0.0489117	0.110051	0.0563843
225	Firmicutes	Clostridia_1	Clostridiales	Ruminococcaceae	Ruminococcaceae_unclassified	0.220103	0.0489117	0.0366838	0.0244559	0.122279	0.0244559	0	0	0.0366838	0.0489117	0.0489117	0.0978234	0.220103	0	0.0244559	0.0366838	0	0	0.0550257
230	Firmicutes	Clostridia_1	Clostridiales	Ruminococcaceae	Ruminococcaceae_unclassified	0	0	0.0366838	0	0.0733676	0.0244559	0.0244559	0.0489117	0.0366838	0.0489117	0.0489117	0.0489117	0	0.0978234	0.122279	0.0733676	0.122279	0.183419	0.0550257
223	Bacteroidetes	Bacteroidia	Bacteroidales	Porphyromonadaceae_2	Porphyromonadaceae_2_unclassified	0	0	0	0.0489117	0	0	0	0.0244559	0	0.0489117	0	0.0244559	0.0244559	0.70922	0.0244559	0.0366838	0.0244559	0	0.053667
234	Firmicutes	Clostridia_1	Clostridiales	Clostridiales_unclassified	Clostridiales_unclassified	0.0244559	0.0978234	0.0733676	0.0489117	0.0978234	0.0244559	0.0244559	0	0.0366838	0.0733676	0.0244559	0.0489117	0.0244559	0.0733676	0.0733676	0.110051	0	0.110051	0.053667
240	Bacteroidetes	Bacteroidia	Bacteroidales	Marinilabiaceae	Uncultured_1	0.0244559	0.0489117	0.0366838	0.0733676	0.0733676	0.0244559	0.0489117	0	0.0366838	0.0733676	0.0244559	0.0733676	0.0489117	0	0.0244559	0.146735	0.0244559	0.183419	0.053667
231	Firmicutes	Clostridia_1	Clostridiales	Ruminococcaceae	Ruminococcaceae_unclassified	0.146735	0.0244559	0.146735	0.0244559	0.0978234	0.0489117	0.0489117	0.0244559	0.0366838	0.0489117	0	0.0244559	0.0489117	0.0244559	0.0733676	0.0366838	0.0978234	0	0.0529877
236	Firmicutes	Clostridia_1	Clostridiales	Lachnospiraceae	Gut_cluster_13	0	0.0244559	0	0.0244559	0.146735	0.0244559	0	0.0244559	0.146735	0.0244559	0.146735	0	0.0733676	0.0978234	0.0733676	0	0	0.146735	0.0529877
235	Firmicutes	Clostridia_1	Clostridiales	Clostridiales_unclassified	Clostridiales_unclassified	0.0244559	0.0489117	0	0.122279	0.0244559	0.0489117	0.0244559	0.0489117	0.0366838	0.0489117	0.0489117	0.0489117	0.0244559	0.0489117	0.0978234	0.0733676	0.0244559	0.146735	0.0523084
239	Lentisphaerae	Lentisphaeria	BS5	BS5_unclassified	BS5_unclassified	0.0733676	0.0733676	0.0366838	0.0733676	0.0489117	0.0489117	0.122279	0.0244559	0	0	0	0.0489117	0.0489117	0.0489117	0.0489117	0.0366838	0.0489117	0.146735	0.051629
232	Planctomycetes	Planctomycetacia	Planctomycetales	Planctomycetaceae	Termite_cockroach_cluster_2	0.0489117	0.0489117	0.146735	0.122279	0.0978234	0.0244559	0	0.0244559	0.0366838	0.0978234	0.0489117	0.0489117	0.0489117	0.0489117	0.0733676	0	0	0	0.0509497
233	Firmicutes	Clostridia_1	Clostridiales	Clostridiales_unclassified	Clostridiales_unclassified	0.0978234	0.0733676	0.0733676	0	0.0978234	0.0978234	0.122279	0.0244559	0.0366838	0.0733676	0	0.0489117	0.0244559	0.0244559	0	0.0366838	0.0489117	0.0366838	0.0509497
241	Firmicutes	Clostridia_1	Clostridiales	Lachnospiraceae	Catabacter	0.0733676	0.146735	0.110051	0.0733676	0.0978234	0.0489117	0.0489117	0	0.110051	0.0244559	0.0733676	0	0.0244559	0.0244559	0.0244559	0	0.0244559	0	0.0502704
243	Firmicutes	Clostridia_1	Clostridiales	Ruminococcaceae	Ruminococcaceae_unclassified	0.0489117	0.0978234	0.0366838	0.122279	0.0244559	0.0733676	0.0489117	0.0978234	0.0366838	0.0244559	0.0244559	0.0244559	0.0244559	0	0.0489117	0.0733676	0.0244559	0.0733676	0.0502704
244	Firmicutes	Clostridia_1	Clostridiales	Family_XIII_Incertae_Sedis	Termite_cockroach_cluster_1	0.0489117	0.0244559	0.110051	0.0244559	0.0244559	0.0978234	0.0244559	0.0244559	0	0.0733676	0.0733676	0	0.0489117	0.0244559	0.0733676	0	0.0489117	0.183419	0.0502704
238	Firmicutes	Clostridia_1	Clostridiales	Lachnospiraceae	Lachnospiraceae_unclassified	0	0.0733676	0	0.0244559	0.0244559	0.0489117	0.0244559	0.0978234	0	0.0489117	0	0.122279	0.146735	0.0489117	0.0733676	0.0733676	0.0489117	0.0366838	0.049591
242	Firmicutes	Clostridia_1	Clostridiales	Lachnospiraceae	Lachnospiraceae_unclassified	0.0978234	0.0244559	0.0366838	0.0978234	0.0244559	0.146735	0	0.0489117	0.110051	0.0733676	0.0244559	0.0244559	0.0244559	0.0244559	0.0489117	0	0.0489117	0.0366838	0.049591
237	Firmicutes	Clostridia_1	Clostridiales	Lachnospiraceae	Lachnospiraceae_unclassified	0.0489117	0	0.0366838	0.0244559	0.0733676	0.0733676	0.0978234	0.0489117	0.0366838	0.0489117	0.122279	0.0489117	0	0.0978234	0.0978234	0	0.0244559	0	0.0489117
246	Firmicutes	Clostridia_1	Clostridiales	Ruminococcaceae	Insect_cluster	0.0733676	0	0	0	0.0733676	0.0978234	0.0733676	0.0244559	0.0733676	0	0	0.0489117	0.0733676	0.0489117	0.0489117	0.0366838	0.146735	0.0366838	0.0475531
268	Bacteroidetes	Bacteroidia	Bacteroidales	Rikenellaceae	M2PB4-61_termite_group	0.0978234	0.0733676	0.146735	0	0.0244559	0	0.0244559	0	0.0366838	0	0.0244559	0	0.0244559	0.0244559	0.0489117	0.0366838	0.0244559	0.256787	0.0468737
245	Firmicutes	Clostridia_1	Clostridiales	Lachnospiraceae	Lachnospiraceae_unclassified	0.0244559	0.171191	0	0	0	0	0.0733676	0.0244559	0.0366838	0.0489117	0	0.122279	0.0244559	0.146735	0.0489117	0	0.0733676	0.0366838	0.0461944
249	Firmicutes	Clostridia_2	Clostridiales_1	Veillonellaceae	Uncultured_7	0.0733676	0.146735	0.0733676	0.0244559	0.0733676	0.0244559	0	0.0733676	0	0	0.0489117	0.0244559	0.0489117	0.0733676	0.0489117	0.0733676	0.0244559	0	0.0461944
262	Verrucomicrobia	Opitutae	vadinHA64	Termite_cluster_II	Termite_cluster_II_unclassified	0.0733676	0	0.0733676	0.0733676	0	0	0.0244559	0.171191	0.146735	0.0489117	0	0.0244559	0.0244559	0.0244559	0.0489117	0	0.0244559	0.0733676	0.0461944
275	Bacteroidetes	Bacteroidia	Bacteroidales	Bacteroidaceae	Bacteroides	0	0	0	0	0.0244559	0.0244559	0.0244559	0	0.146735	0	0.0244559	0	0.0244559	0.0489117	0.0244559	0.256787	0.122279	0.110051	0.0461944
248	Firmicutes	Clostridia_2	Clostridiales_1	Peptococcaceae_1	Uncultured_2	0.0733676	0.195647	0	0.0244559	0.0244559	0	0.0733676	0.0244559	0.0366838	0.146735	0.0489117	0.0733676	0	0.0244559	0	0	0.0244559	0.0366838	0.0448357
250	Bacteroidetes	Bacteroidia	Bacteroidales	Porphyromonadaceae_3	Tannerella	0.0244559	0.0244559	0	0.0733676	0.0733676	0	0	0.0244559	0.0366838	0.0733676	0.0244559	0.0244559	0.0489117	0.0733676	0.0978234	0.0366838	0.0978234	0.0733676	0.0448357
252	Firmicutes	Bacilli	Lactobacillales	Leuconostocaceae	Weissella_1	0	0.0733676	0	0.0978234	0	0.171191	0.0244559	0.0244559	0.0733676	0.0244559	0	0.0733676	0.0244559	0	0.0978234	0	0.0489117	0.0733676	0.0448357
251	Bacteroidetes	Bacteroidia	Bacteroidales	Rikenellaceae	gut_cluster_c	0.0978234	0.0489117	0	0.0489117	0.0244559	0.0244559	0	0.0244559	0.0733676	0	0.0489117	0.0978234	0	0.0489117	0.146735	0	0.0733676	0.0366838	0.0441564
254	Firmicutes	Clostridia_1	Clostridiales	Ruminococcaceae	Ruminococcaceae_unclassified	0.269014	0.0244559	0	0	0.0978234	0.0244559	0.0489117	0.0489117	0.0366838	0.171191	0	0.0244559	0	0	0	0	0	0.0366838	0.0434771
253	Firmicutes	Clostridia_1	Clostridiales	Lachnospiraceae	Lachnospiraceae_unclassified	0	0	0	0.0489117	0.0489117	0.0733676	0.0244559	0.0733676	0	0.0733676	0	0.0733676	0.0489117	0.0978234	0.146735	0.0366838	0	0.0366838	0.0434771
258	Firmicutes	Clostridia_1	Clostridiales	Ruminococcaceae	Ruminococcaceae_unclassified	0	0	0	0.0733676	0.0733676	0.0244559	0.0489117	0.195647	0.0733676	0.0489117	0.0489117	0.0733676	0	0	0.0489117	0	0	0.0733676	0.0434771
257	Firmicutes	Clostridia_1	Clostridiales	Ruminococcaceae	Ruminococcaceae_unclassified	0.0244559	0	0.0366838	0.0489117	0.0489117	0.0978234	0.0244559	0	0	0.122279	0.0244559	0.122279	0.0733676	0.0244559	0.0244559	0.0366838	0.0244559	0.0366838	0.0427978
266	Firmicutes	Clostridia_1	Clostridiales	Lachnospiraceae	Gut_cluster_13	0.0489117	0	0.0733676	0.146735	0	0.0489117	0	0.0244559	0.0366838	0	0.0978234	0.0733676	0	0.0489117	0.0244559	0.0366838	0.0733676	0.0366838	0.0427978
261	Proteobacteria	Alphaproteobacteria	Rhodospirillales_1	Rhodospirillaceae	Thalassospira	0.0489117	0.0244559	0.0366838	0.0489117	0.0244559	0.0244559	0.122279	0.0978234	0	0	0.0244559	0.0978234	0.0733676	0.0733676	0	0	0.0244559	0.0366838	0.0421184
255	Bacteroidetes	Bacteroidia	Bacteroidales	Porphyromonadaceae_2	Paludibacter	0.0489117	0.0244559	0	0	0.122279	0.122279	0.0978234	0.0244559	0.0733676	0.0244559	0	0.0489117	0.0244559	0.0244559	0.0978234	0	0.0244559	0	0.0421184
259	Planctomycetes	Planctomycetacia	Planctomycetales	Planctomycetaceae	Termite_cockroach_cluster_2	0.146735	0	0.0366838	0.0489117	0.171191	0.0489117	0.0489117	0	0.0366838	0.0244559	0.0489117	0.0244559	0.0244559	0.0489117	0.0489117	0	0	0	0.0421184
265	Firmicutes	Clostridia_1	Clostridiales	Lachnospiraceae	Gut_cluster_13	0.0489117	0.0489117	0.0366838	0.0489117	0.0244559	0	0.0489117	0.0244559	0	0.0489117	0.0244559	0.0733676	0.0244559	0.0244559	0.0489117	0.0733676	0.122279	0.0366838	0.0421184
271	Firmicutes	Clostridia_1	Clostridiales	Lachnospiraceae	Lachnospiraceae_unclassified	0.0244559	0	0	0.0489117	0.0978234	0.0489117	0.0978234	0.0733676	0.110051	0	0.0489117	0.0244559	0	0	0	0.0733676	0.0733676	0.0366838	0.0421184
247	Cyanobacteria	Cyanobacteria	Cyanobacteriales	C0d-2	C0d-2_unclassified	0.0244559	0	0	0.0733676	0.0733676	0	0.0978234	0.122279	0	0.0978234	0.0244559	0.0489117	0.0733676	0.0244559	0.0489117	0.0366838	0	0	0.0414391
264	Firmicutes	Clostridia_1	Clostridiales	Clostridiales_unclassified	Clostridiales_unclassified	0.0978234	0.0489117	0.0366838	0	0.0978234	0.146735	0.0489117	0.0733676	0.0733676	0.0244559	0	0.0244559	0.0489117	0.0244559	0	0	0	0	0.0414391
260	Proteobacteria	Alphaproteobacteria	Rhizobiales_1	Rhizobiaceae	Rhizobium-Agrobacterium	0.0733676	0	0	0.0244559	0.0489117	0.122279	0.0489117	0	0.0733676	0.0244559	0.0244559	0.171191	0	0.0244559	0.0733676	0	0	0.0366838	0.0414391
267	Actinobacteria	Actinobacteria	Coriobacteriales	Coriobacteriaceae	Coriobacteriaceae_unclassified	0.0489117	0.0244559	0.146735	0.0489117	0.0489117	0.0489117	0.0489117	0.0489117	0.0366838	0.0733676	0.0244559	0.0733676	0.0489117	0	0.0244559	0	0	0	0.0414391
280	Firmicutes	Clostridia_1	Clostridiales	Ruminococcaceae	Termite_cockroach_cluster	0	0.0489117	0.0733676	0.0244559	0.0733676	0.0978234	0.0244559	0.0244559	0.0366838	0	0.0244559	0.0489117	0.0489117	0	0.0244559	0.0733676	0.0489117	0.0733676	0.0414391
263	Bacteroidetes	Bacteroidia	Bacteroidales	Rikenellaceae	Alistipes_III	0	0.0244559	0.0366838	0	0.0978234	0	0.0489117	0.171191	0.0366838	0.0489117	0.0733676	0	0.0733676	0.0733676	0.0489117	0	0	0	0.0407598
256	Firmicutes	Clostridia_1	Clostridiales	Ruminococcaceae	Gut_cluster_9	0.0733676	0.0244559	0.110051	0	0.146735	0.0978234	0	0	0	0.0978234	0.0244559	0.0489117	0	0.0978234	0	0	0	0	0.0400804
273	Firmicutes	Firmicutes_unclassified	Firmicutes_unclassified	Firmicutes_unclassified	Firmicutes_unclassified	0.0978234	0	0.0366838	0.0244559	0.0489117	0.0733676	0.0489117	0.0733676	0.0366838	0.0978234	0.0489117	0.0244559	0	0.0244559	0.0244559	0	0.0244559	0.0366838	0.0400804
274	Proteobacteria	Deltaproteobacteria	Desulfovibrionales	Desulfovibrionaceae	Gut_cluster_3	0.0244559	0	0.0366838	0.0733676	0.146735	0.0244559	0.0733676	0.0489117	0.110051	0.0244559	0.0244559	0	0.0244559	0	0.0244559	0.0366838	0.0489117	0	0.0400804
270	Firmicutes	Clostridia_1	Clostridiales	Lachnospiraceae	Gut_cluster_13	0.0244559	0.0733676	0	0	0.0244559	0.0733676	0	0.0733676	0	0.0244559	0.0244559	0	0.122279	0.146735	0	0.0733676	0.0489117	0	0.0394011
269	Cyanobacteria	Cyanobacteria	Cyanobacteriales	Chloroplast	Chloroplast	0.0244559	0	0.0366838	0	0.171191	0.0489117	0	0.0244559	0	0.0978234	0.0244559	0.171191	0.0489117	0.0244559	0	0	0	0.0366838	0.0394011
272	Firmicutes	Clostridia_1	Clostridiales	Ruminococcaceae	Uncultured_12	0.0244559	0.0489117	0	0.0733676	0.0733676	0.0489117	0.0489117	0.0489117	0.0366838	0.0489117	0.0489117	0.0489117	0	0.0978234	0	0.0366838	0.0244559	0	0.0394011
278	Firmicutes	Clostridia_1	Clostridiales	Eubacteriaceae_1	Eubacteriaceae_1_unclassified	0.0489117	0.0978234	0	0.0978234	0.0489117	0	0.0244559	0	0.0366838	0.0244559	0	0	0.0978234	0.0489117	0.0244559	0.0366838	0.0489117	0.0733676	0.0394011
276	Bacteroidetes	Bacteroidia	Bacteroidales	Porphyromonadaceae_1	Dysgonomonas	0.0489117	0.0733676	0.0366838	0.0978234	0.0244559	0.0244559	0.0489117	0.0244559	0.0366838	0	0	0.0244559	0	0.0244559	0.0489117	0.0733676	0.122279	0	0.0394011
279	Firmicutes	Clostridia_1	Clostridiales	Lachnospiraceae	Lachnospiraceae_unclassified	0.0489117	0	0	0	0	0	0	0	0	0.146735	0	0	0	0.0733676	0.0489117	0.0733676	0.244559	0.0733676	0.0394011
282	Bacteroidetes	Bacteroidia	Bacteroidales	Porphyromonadaceae_3	Porphyromonadaceae_3_unclassified	0.0978234	0.0733676	0.110051	0.0489117	0.0733676	0	0.0244559	0.0244559	0.110051	0	0.0244559	0.0489117	0.0489117	0	0	0	0.0244559	0	0.0394011
286	Firmicutes	Clostridia_2	Clostridiales	Syntrophomonadaceae	Pelospora	0.0978234	0.0244559	0.0733676	0	0.0244559	0.0244559	0.0733676	0	0.110051	0.0489117	0.0733676	0	0.0489117	0.0489117	0.0244559	0	0	0.0366838	0.0394011
288	Proteobacteria	Deltaproteobacteria	Desulfobacterales	Desulfobulbaceae	Desulfobulbus	0.0733676	0.0244559	0.0366838	0.0244559	0.0489117	0.0733676	0.0244559	0.0489117	0.183419	0.0244559	0.0489117	0.0244559	0.0244559	0	0	0	0.0489117	0	0.0394011
277	Bacteroidetes	Bacteroidia	Bacteroidales	Rikenellaceae	Alisitpes_IV	0.0733676	0	0.0733676	0	0.0733676	0.122279	0.0733676	0	0.0366838	0.0489117	0	0.0978234	0	0.0244559	0	0	0.0733676	0	0.0387218
290	Firmicutes	CK-1C4-19	CK-1C4-19_unclassified	CK-1C4-19_unclassified	CK-1C4-19_unclassified	0	0.0489117	0.0733676	0.0978234	0	0	0.0244559	0.0244559	0	0	0	0.0244559	0.0244559	0.0244559	0.0489117	0.0366838	0.146735	0.110051	0.0380424
284	Firmicutes	Clostridia_1	Clostridiales	Family_XIII_Incertae_Sedis	Family_XIII_Incertae_Sedis_unclassified	0.0489117	0.146735	0.0366838	0.0489117	0.0733676	0.0489117	0.0244559	0	0	0.0733676	0.0733676	0.0244559	0	0	0	0	0	0.0733676	0.0373631
281	Bacteroidetes	Bacteroidia	Bacteroidales	Bacteroidales_unclassified	Bacteroidales_unclassified	0.0489117	0	0.0733676	0.0244559	0.0489117	0	0.0489117	0.0733676	0	0.0244559	0	0.0244559	0.0244559	0.0244559	0.146735	0	0.0733676	0.0366838	0.0373631
299	Proteobacteria	Gammaproteobacteria_1	Enterobacteriales	Enterobacteriaceae	Enterobacteriaceae_unclassified	0	0.0244559	0	0.0733676	0.0489117	0	0	0.0489117	0.0366838	0	0.0244559	0.0733676	0.0244559	0.0489117	0.0489117	0.146735	0.0733676	0	0.0373631
306	Proteobacteria	Deltaproteobacteria	Bdellovibrionales	Bacteriovoraceae	Bacteriovoraceae_unclassified	0	0	0	0	0	0	0.0244559	0.0244559	0	0	0.0489117	0	0.0489117	0.0733676	0.0978234	0.0733676	0.0978234	0.183419	0.0373631
285	Firmicutes	Clostridia_1	Clostridiales	Lachnospiraceae	Robinsoniella_Insects	0.0244559	0.0733676	0	0.0733676	0	0	0	0.0733676	0	0.0978234	0.0489117	0.0489117	0.0244559	0	0.122279	0.0733676	0	0	0.0366838
289	Bacteroidetes	Bacteroidia	Bacteroidales	Bacteroidales_unclassified	Bacteroidales_unclassified	0.0489117	0.0733676	0.110051	0.0244559	0.0489117	0.0244559	0.122279	0.0978234	0.0366838	0.0244559	0	0	0	0.0244559	0.0244559	0	0	0	0.0366838
291	Firmicutes	Clostridia_1	Clostridiales	Lachnospiraceae	Gut_cluster_15	0.0244559	0.0244559	0.0733676	0.0733676	0	0.0489117	0	0	0.0366838	0.0489117	0.0244559	0.0489117	0	0.0978234	0.0978234	0.0366838	0.0244559	0	0.0366838
296	Proteobacteria	Alphaproteobacteria	Rhodospirillales_1	Rhodospirillaceae	Thalassospira	0	0	0	0.0244559	0	0.0489117	0.0244559	0	0.0366838	0.0733676	0.0244559	0	0.0733676	0.0244559	0.195647	0.0366838	0.0244559	0.0733676	0.0366838
304	Firmicutes	Firmicutes_unclassified	Firmicutes_unclassified	Firmicutes_unclassified	Firmicutes_unclassified	0	0	0.0366838	0.0244559	0.0244559	0	0	0.0489117	0.0366838	0.0244559	0.0978234	0.0244559	0.0489117	0.0733676	0.0244559	0.0366838	0.0489117	0.110051	0.0366838
316	Firmicutes	Clostridia_2	Clostridiales_1	Peptococcaceae_1	Uncultured_2	0.0244559	0	0	0	0.0489117	0	0.0244559	0	0.110051	0	0.0978234	0	0.122279	0	0.0244559	0.0733676	0.0244559	0.110051	0.0366838
293	Firmicutes	Clostridia_1	Clostridiales	Ruminococcaceae	Incertae_Sedis_3	0.0733676	0.0244559	0.0366838	0.0489117	0.0489117	0	0.0733676	0.146735	0.0733676	0	0.0489117	0	0.0244559	0	0.0244559	0	0.0244559	0	0.0360045
292	Firmicutes	Clostridia_1	Clostridiales	Lachnospiraceae	Lachnospiraceae_unclassified	0	0.0733676	0.0366838	0.0733676	0	0	0.0733676	0	0.0733676	0.0244559	0	0	0	0.0489117	0.220103	0	0.0244559	0	0.0360045
303	Firmicutes	Clostridia_2	Clostridiales_1	Peptococcaceae_1	Uncultured_2	0	0.171191	0.0366838	0.0489117	0.0733676	0.0244559	0	0.0244559	0.0366838	0	0	0	0.0733676	0.0244559	0	0.0733676	0.0244559	0.0366838	0.0360045
283	Firmicutes	Bacilli	Bacilli_unclassified	Bacilli_unclassified	Bacilli_unclassified	0	0	0	0	0	0	0	0	0	0	0	0	0.635852	0	0	0	0	0	0.0353251
294	Firmicutes	Clostridia_1	Clostridiales	Ruminococcaceae	Ruminococcaceae_unclassified	0.122279	0.0489117	0	0.0244559	0.0489117	0	0.0244559	0.0489117	0.0733676	0.0489117	0.0489117	0.0733676	0.0489117	0	0	0	0.0244559	0	0.0353251
295	Firmicutes	Clostridia_1	Clostridiales	Ruminococcaceae	Ruminococcaceae_unclassified	0.146735	0	0.0366838	0.0244559	0.0733676	0	0.0489117	0.0489117	0.0366838	0	0.0733676	0.0733676	0	0.0489117	0	0	0.0244559	0	0.0353251
297	Proteobacteria	Deltaproteobacteria	Desulfovibrionales	Desulfovibrionaceae	Gut_cluster_3	0.0244559	0.0244559	0	0.0489117	0.0244559	0.0733676	0.0733676	0	0.0366838	0.0733676	0.0244559	0.0733676	0	0.0489117	0.0489117	0.0366838	0.0244559	0	0.0353251
307	Proteobacteria	Deltaproteobacteria	Desulfovibrionales	Desulfovibrionaceae	Gut_cluster_3	0.0978234	0	0.0733676	0.0244559	0.0244559	0.0489117	0.0244559	0.0244559	0.0366838	0	0.0489117	0.0244559	0.0244559	0.0733676	0.0489117	0.0366838	0.0244559	0	0.0353251
330	Bacteroidetes	Bacteroidia	Bacteroidales	Porphyromonadaceae_3	Tannerella	0	0	0	0	0	0.0244559	0	0	0.220103	0	0	0.122279	0.0489117	0.0244559	0.0244559	0.110051	0.0244559	0.0366838	0.0353251
298	Proteobacteria	Deltaproteobacteria	Desulfovibrionales	Desulfovibrionaceae	Gut_cluster_3	0.0489117	0.0489117	0.0366838	0.0244559	0.0489117	0	0.0489117	0.0489117	0	0	0.0489117	0.0244559	0.0244559	0.0244559	0.122279	0.0366838	0	0.0366838	0.0346458
302	Firmicutes	Clostridia_1	Clostridiales	Ruminococcaceae	Termite_cockroach_cluster	0.0244559	0.122279	0	0	0.0489117	0.0733676	0.0489117	0.0244559	0	0.0489117	0.0244559	0.0489117	0	0.0489117	0	0.0366838	0	0.0733676	0.0346458
305	Proteobacteria	Alphaproteobacteria	Rhodospirillales_1	Rhodospirillaceae	Thalassospira	0.0244559	0.0489117	0	0.0244559	0	0.0244559	0	0.0733676	0.110051	0.0733676	0.0489117	0	0.0244559	0.0978234	0.0244559	0	0.0489117	0	0.0346458
308	Verrucomicrobia	Opitutae	Opitutales	Opitutaceae	Opitutus	0.0978234	0.0978234	0.0733676	0	0.0244559	0.0978234	0.0244559	0	0	0.0489117	0.0244559	0.0978234	0	0	0	0	0.0244559	0	0.0339665
313	Firmicutes	Clostridia_1	Clostridiales	Ruminococcaceae	Ruminococcaceae_unclassified	0.0489117	0.122279	0	0.0489117	0.0244559	0.0244559	0	0.0244559	0.0733676	0	0.122279	0	0.0489117	0	0	0	0	0.0733676	0.0339665
312	Firmicutes	Clostridia_1	Clostridiales	Lachnospiraceae	Lachnospiraceae_unclassified	0	0	0.0733676	0	0	0	0.0489117	0.0489117	0	0.0244559	0.0489117	0.0244559	0.146735	0.0733676	0.0489117	0.0366838	0	0.0366838	0.0339665
310	Bacteroidetes	Bacteroidia	Bacteroidales	Porphyromonadaceae_Cluster_V	Porphyromonadaceae_Cluster_V_unclassified	0.122279	0	0.0366838	0.0489117	0.0244559	0.0978234	0.0244559	0.0244559	0.0366838	0	0.0244559	0.0733676	0.0244559	0	0	0.0733676	0	0	0.0339665
300	Bacteroidetes	Bacteroidia	Bacteroidales	Porphyromonadaceae_2	Paludibacter	0	0	0.0366838	0	0	0.0733676	0	0.0978234	0	0	0	0	0	0	0	0	0.391294	0	0.0332871
301	Bacteroidetes	Bacteroidia	Bacteroidales	Porphyromonadaceae_3	Cluster_IV	0.0244559	0.0489117	0	0.0244559	0	0	0.0489117	0	0.0366838	0.0733676	0.0733676	0.0978234	0.0244559	0.0733676	0	0	0.0733676	0	0.0332871
287	Planctomycetes	vadinHA49	Insect_cluster	Insect_cluster_unclassified	Insect_cluster_unclassified	0.122279	0.0244559	0.0366838	0.0733676	0.0733676	0.0489117	0.0489117	0.0244559	0	0.0244559	0.0244559	0.0244559	0.0244559	0	0.0244559	0	0.0244559	0	0.0332871
311	Firmicutes	Clostridia_1	Clostridiales	Lachnospiraceae	Lachnospiraceae_unclassified	0.0489117	0	0	0.0733676	0.0244559	0.0733676	0.0244559	0.0489117	0	0.0489117	0	0	0.0733676	0.0489117	0.0244559	0.0366838	0	0.0733676	0.0332871
315	Firmicutes	Clostridia_1	Clostridiales	Ruminococcaceae	Termite_cockroach_cluster	0.0733676	0.0489117	0	0.0244559	0	0	0.0244559	0.0244559	0.0733676	0.122279	0.0489117	0.0244559	0	0	0.0733676	0.0366838	0.0244559	0	0.0332871
327	Firmicutes	Firmicutes_unclassified	Firmicutes_unclassified	Firmicutes_unclassified	Firmicutes_unclassified	0.0489117	0.0244559	0.0733676	0.0244559	0.0489117	0.0244559	0.0244559	0.0489117	0.0733676	0	0	0.0733676	0.0489117	0	0.0244559	0.0366838	0.0244559	0	0.0332871
339	Actinobacteria	Actinobacteria	Actinomycetales_1	Streptomycetaceae	Streptomyces_3	0	0.0244559	0.183419	0	0.0733676	0.0733676	0	0	0	0	0	0.0733676	0	0	0.0244559	0.110051	0	0.0366838	0.0332871
309	Bacteroidetes	Bacteroidetes_unclassified	Bacteroidetes_unclassified	Bacteroidetes_unclassified	Bacteroidetes_unclassified	0.0244559	0.0244559	0	0.0978234	0.0244559	0	0	0.0244559	0.0733676	0	0.122279	0.0244559	0.0244559	0.0978234	0.0244559	0	0.0244559	0	0.0326078
314	Firmicutes	Clostridia_1	Clostridiales	Ruminococcaceae	Ruminococcaceae_unclassified	0.122279	0.0733676	0.0733676	0.0244559	0.0489117	0.0244559	0.122279	0	0	0	0	0.0733676	0.0244559	0	0	0	0	0	0.0326078
317	Tenericutes	Mollicutes	Mollicutes_unclassified	Mollicutes_unclassified	Mollicutes_unclassified	0.0244559	0	0.0366838	0.0489117	0	0.0733676	0.0489117	0.0733676	0.0366838	0.0244559	0.0244559	0.0733676	0	0.122279	0	0	0	0	0.0326078
320	Bacteroidetes	Bacteroidia	Bacteroidales	Bacteroidaceae	Bacteroides	0.0489117	0.0244559	0	0	0	0	0.0489117	0.0244559	0	0	0	0	0.0978234	0.0489117	0.0244559	0.110051	0.122279	0.0366838	0.0326078
328	Proteobacteria	Deltaproteobacteria	Desulfovibrionales	Desulfovibrionaceae	Gut_cluster_3	0.0244559	0.0733676	0	0.0244559	0	0.0244559	0.0733676	0.0244559	0.0366838	0	0	0.0244559	0.0244559	0.0489117	0.0978234	0.110051	0	0	0.0326078
322	Bacteroidetes	Bacteroidia	Bacteroidales	Porphyromonadaceae_Cluster_V	Porphyromonadaceae_Cluster_V_unclassified	0.0489117	0.0489117	0.110051	0.0244559	0.0489117	0.0978234	0.0489117	0.0244559	0.0366838	0	0.0244559	0.0489117	0	0.0244559	0	0	0	0	0.0326078
337	Firmicutes	Firmicutes_unclassified	Firmicutes_unclassified	Firmicutes_unclassified	Firmicutes_unclassified	0.146735	0.0489117	0.220103	0	0.0244559	0.0244559	0.0244559	0	0	0	0.0244559	0	0.0489117	0	0	0	0.0244559	0	0.0326078
345	Firmicutes	Clostridia_1	Clostridiales	Ruminococcaceae	Termite_cockroach_cluster	0	0	0	0.0489117	0.0244559	0.0244559	0.0244559	0	0	0.0244559	0	0.0489117	0.0244559	0	0.0489117	0.0733676	0.0244559	0.220103	0.0326078
323	Firmicutes	Clostridia_1	Clostridiales	Clostridiales_unclassified	Clostridiales_unclassified	0	0.0978234	0.110051	0	0.0244559	0.0489117	0.0244559	0	0	0	0.0978234	0	0.0489117	0.0244559	0.0733676	0	0.0244559	0	0.0319285
324	Firmicutes	Clostridia_1	Clostridiales	Ruminococcaceae	Gut_cluster_7	0.0733676	0	0.0366838	0.0489117	0.0244559	0.0489117	0.0489117	0	0.0733676	0	0.0244559	0.0733676	0	0.0244559	0.0733676	0	0.0244559	0	0.0319285
333	Firmicutes	Clostridia_1	Clostridiales	Ruminococcaceae	Insect_cluster	0.0244559	0.0489117	0.0366838	0.0244559	0.0489117	0	0.0244559	0	0.110051	0.0244559	0.0489117	0	0.0489117	0	0.0244559	0	0.0733676	0.0366838	0.0319285
336	Firmicutes	Firmicutes_unclassified	Firmicutes_unclassified	Firmicutes_unclassified	Firmicutes_unclassified	0	0.0244559	0.0366838	0.0244559	0	0	0.0244559	0.0244559	0.0366838	0.0244559	0.0978234	0.0733676	0.0489117	0	0.0489117	0.0366838	0	0.0733676	0.0319285
329	Synergistetes	Synergistia	Synergistales	Synergistaceae	Candidatus_Tammella	0.0489117	0.0244559	0.0366838	0.122279	0.0733676	0	0	0	0.0366838	0.0244559	0	0	0.0244559	0.0244559	0.0733676	0	0.0733676	0	0.0312492
319	Bacteroidetes	Bacteroidetes_unclassified	Bacteroidetes_unclassified	Bacteroidetes_unclassified	Bacteroidetes_unclassified	0.0733676	0	0	0	0.0244559	0	0.0489117	0.0489117	0.0366838	0	0.0733676	0	0.0244559	0	0.0489117	0	0.146735	0.0366838	0.0312492
318	Actinobacteria	Actinobacteria	Micrococcales_3	Microbacteriaceae	Microbacteriaceae_unclassified	0.0733676	0.0978234	0.0366838	0	0.0733676	0.0733676	0.0244559	0.0244559	0.0366838	0.0244559	0.0244559	0.0244559	0	0.0244559	0.0244559	0	0	0	0.0312492
321	Bacteroidetes	Bacteroidia	Bacteroidales	Bacteroidales_unclassified	Bacteroidales_unclassified	0.0244559	0	0.0366838	0.122279	0.0244559	0.0489117	0.0244559	0	0.0366838	0.0244559	0.0489117	0.0244559	0	0.0489117	0.0244559	0	0.0733676	0	0.0312492
332	Firmicutes	Clostridia_1	Clostridiales	Lachnospiraceae	Lachnospiraceae_unclassified	0	0.0244559	0	0	0	0.0489117	0.0489117	0.0244559	0.110051	0.0733676	0.0244559	0	0.0489117	0.0733676	0.0244559	0.0366838	0.0244559	0	0.0312492
334	Firmicutes	Clostridia_2	Clostridia_2_unclassified	Clostridia_2_unclassified	Clostridia_2_unclassified	0	0	0.0733676	0.0244559	0.0489117	0.0978234	0.0489117	0.0489117	0	0	0.0489117	0	0	0.0489117	0	0.0733676	0.0489117	0	0.0312492
335	Firmicutes	Firmicutes_unclassified	Firmicutes_unclassified	Firmicutes_unclassified	Firmicutes_unclassified	0.0489117	0	0.0366838	0.0978234	0.0489117	0	0.0489117	0	0.0366838	0.0489117	0.0244559	0.0244559	0.0244559	0.0489117	0	0	0.0244559	0.0366838	0.0305698
331	Firmicutes	Clostridia_1	Clostridiales	Lachnospiraceae	Candidatus_Arthromitus	0	0	0.0366838	0	0	0.0244559	0.122279	0.0733676	0.0366838	0.0489117	0	0.122279	0.0244559	0	0.0244559	0.0366838	0	0	0.0305698
343	Firmicutes	Clostridia_1	Clostridiales	Lachnospiraceae	Candidatus_Arthromitus	0.0244559	0.0733676	0	0.0244559	0	0.0244559	0.0244559	0	0.110051	0.0489117	0.0244559	0.0489117	0.0244559	0.0489117	0	0.0733676	0	0	0.0305698
346	Firmicutes	Firmicutes_unclassified	Firmicutes_unclassified	Firmicutes_unclassified	Firmicutes_unclassified	0.0489117	0	0	0	0	0.0733676	0	0	0.0366838	0	0	0.0244559	0.0244559	0	0	0.0733676	0.195647	0.0733676	0.0305698
325	Firmicutes	Clostridia_1	Clostridiales	Ruminococcaceae	Ruminococcaceae_unclassified	0.0733676	0.0244559	0.0366838	0.0733676	0.0244559	0.0489117	0.0244559	0.0489117	0.0366838	0	0.0244559	0.0978234	0.0244559	0	0	0	0	0	0.0298905
338	Proteobacteria	Deltaproteobacteria	Desulfovibrionales	Desulfovibrionaceae	Gut_cluster_3	0	0	0	0.0489117	0.0244559	0	0.0489117	0	0	0.0244559	0.0978234	0.0733676	0.0489117	0.0489117	0.0244559	0.0733676	0.0244559	0	0.0298905
350	Proteobacteria	Deltaproteobacteria	Desulfovibrionales	Desulfovibrionaceae	Gut_cluster_3	0.0489117	0.0244559	0.0733676	0	0.0244559	0	0.0244559	0.0978234	0	0	0	0.0489117	0.0244559	0.0733676	0	0	0.0244559	0.0733676	0.0298905
344	Firmicutes	Clostridia_1	Clostridiales	Ruminococcaceae	Gut_cluster_7	0	0.0733676	0	0	0	0	0.0244559	0.0489117	0	0	0.122279	0.0244559	0.0489117	0.0244559	0.0244559	0.0733676	0.0244559	0.0366838	0.0292112
348	Proteobacteria	Deltaproteobacteria	Desulfovibrionales	Desulfovibrionaceae	Gut_cluster_2	0	0.0489117	0	0.0489117	0.0978234	0	0.0489117	0	0.110051	0.0489117	0.0244559	0	0.0244559	0.0244559	0.0244559	0	0.0244559	0	0.0292112
349	Proteobacteria	Deltaproteobacteria	Desulfovibrionales	Desulfovibrionaceae	Gut_cluster_3	0	0	0.0366838	0.0733676	0.0244559	0.0244559	0.0244559	0.0489117	0.0733676	0	0.0978234	0	0	0	0.0978234	0	0.0244559	0	0.0292112
367	Firmicutes	Firmicutes_unclassified	Firmicutes_unclassified	Firmicutes_unclassified	Firmicutes_unclassified	0.0244559	0.0244559	0.0366838	0.0733676	0.0244559	0	0	0.0489117	0.110051	0	0.0244559	0.0489117	0	0.0244559	0	0	0.0489117	0.0366838	0.0292112
368	Proteobacteria	Alphaproteobacteria	Sphingomonadales	Erythrobacteraceae	Erythrobacteraceae_unclassified	0	0	0	0.0244559	0	0.0244559	0	0.0978234	0	0	0	0	0.122279	0.0244559	0	0	0.0489117	0.183419	0.0292112
352	Bacteroidetes	Bacteroidia	Bacteroidales	Porphyromonadaceae_3	Porphyromonadaceae_3_unclassified	0.0244559	0	0	0	0	0.0733676	0.0489117	0	0	0.0244559	0	0.0489117	0.0489117	0	0.0489117	0.146735	0.0244559	0.0366838	0.0292112
364	Firmicutes	Clostridia_1	Clostridiales	Ruminococcaceae	Ruminococcaceae_unclassified	0	0	0	0	0	0.0489117	0.0244559	0.0489117	0	0	0	0	0.0244559	0.0489117	0.0978234	0.0366838	0.0489117	0.146735	0.0292112
326	Firmicutes	Clostridia_2	Clostridiales_1	Veillonellaceae	Phascolarctobacterium	0	0	0	0	0	0	0	0	0	0	0	0	0.342382	0	0.0244559	0	0.146735	0	0.0285318
342	Firmicutes	Clostridia_1	Clostridiales	Clostridiales_unclassified	Clostridiales_unclassified	0.0489117	0.0244559	0	0.0489117	0.0489117	0.0489117	0.0244559	0	0.0733676	0.0733676	0.0489117	0	0	0	0	0	0.0733676	0	0.0285318
361	Firmicutes	Clostridia_1	Clostridiales	Ruminococcaceae	Insect_cluster	0	0.0489117	0	0	0.0489117	0	0.0244559	0	0	0.0244559	0.0244559	0.0489117	0.122279	0	0	0	0.0244559	0.146735	0.0285318
357	Firmicutes	Clostridia_1	Clostridiales	Lachnospiraceae	Gut_cluster_13	0.0489117	0	0.0733676	0.0244559	0	0	0.0733676	0.0733676	0	0.0489117	0.0489117	0.0244559	0	0	0	0.0366838	0.0244559	0.0366838	0.0285318
360	Firmicutes	Clostridia_1	Clostridiales	Ruminococcaceae	Hydrogenoanaerobacterium	0.0244559	0.0244559	0.0366838	0	0.0489117	0.0489117	0.0244559	0	0.0366838	0.0244559	0.0244559	0.0244559	0.0733676	0.0244559	0	0.0366838	0.0244559	0.0366838	0.0285318
363	Firmicutes	Clostridia_1	Clostridiales	Ruminococcaceae	Ruminococcaceae_unclassified	0.0733676	0.0489117	0.146735	0	0.0244559	0.0489117	0.0244559	0.0244559	0	0.0244559	0.0489117	0.0244559	0	0.0244559	0	0	0	0	0.0285318
354	Firmicutes	Bacilli	Lactobacillales	Lactobacillales_unclassified	Lactobacillales_unclassified	0	0.0244559	0.0733676	0.0244559	0	0.0489117	0.0244559	0.0244559	0.0366838	0.0244559	0.0244559	0.0244559	0	0.0489117	0.0733676	0.0366838	0.0244559	0	0.0285318
340	Bacteroidetes	Bacteroidia	Bacteroidales	Bacteroidales_unclassified	Bacteroidales_unclassified	0.122279	0.0244559	0.0366838	0.146735	0	0.0244559	0	0.0489117	0	0.0244559	0	0.0489117	0	0	0	0	0.0244559	0	0.0278525
341	Bacteroidetes	Bacteroidia	Bacteroidales	Porphyromonadaceae_2	Porphyromonadaceae_2_unclassified	0.244559	0.0244559	0.0366838	0.0244559	0.0244559	0.0244559	0.0244559	0.0733676	0	0	0	0.0244559	0	0	0	0	0	0	0.0278525
365	Firmicutes	Clostridia_1	Clostridiales	Ruminococcaceae	Ruminococcaceae_unclassified	0.0489117	0.0244559	0	0	0.0978234	0.0244559	0.0489117	0.0489117	0.0733676	0.0244559	0.0244559	0	0.0244559	0	0	0	0.0244559	0.0366838	0.0278525
355	Firmicutes	Bacilli	Lactobacillales	Lactobacillales_unclassified	Lactobacillales_unclassified	0	0.0244559	0.110051	0.0244559	0	0.0489117	0.0489117	0.0244559	0	0.0244559	0.0733676	0.0244559	0.0244559	0.0244559	0.0489117	0	0	0	0.0278525
377	Proteobacteria	Alphaproteobacteria	Rhizobiales_1	Shinella_genera_incertae_sedis	Shinella_genera_incertae_sedis	0.0244559	0.0489117	0.0366838	0	0	0.0733676	0.0244559	0	0.0366838	0	0.0489117	0	0	0	0	0.0366838	0.0978234	0.0733676	0.0278525
351	Synergistetes	Synergistia	Synergistales	Synergistaceae	Candidatus_Tammella	0.0733676	0	0	0.0244559	0.0489117	0.0489117	0.0489117	0.0733676	0	0	0.0244559	0.0244559	0.0244559	0.0733676	0	0	0.0244559	0	0.0271732
359	Firmicutes	Clostridia_1	Clostridiales	Lachnospiraceae	Uncultured_13	0	0.0733676	0	0.0733676	0.0244559	0	0	0.0733676	0	0.0244559	0	0	0.0489117	0	0.0489117	0.0733676	0.0489117	0	0.0271732
356	Firmicutes	Clostridia_1	Clostridiales	Lachnospiraceae	Catabacter	0	0.0489117	0.0366838	0	0.0489117	0	0.0489117	0	0	0.0244559	0.0244559	0.0489117	0.0244559	0.0489117	0.0489117	0	0.0489117	0.0366838	0.0271732
358	Firmicutes	Clostridia_1	Clostridiales	Lachnospiraceae	Lachnospiraceae_unclassified	0	0.0244559	0.0366838	0	0.0244559	0.0489117	0.0244559	0.0733676	0.0366838	0	0.0978234	0	0.0244559	0.0489117	0.0244559	0	0.0244559	0	0.0271732
383	Proteobacteria	Deltaproteobacteria	Desulfovibrionales	Desulfovibrionaceae	Gut_cluster_3	0.0489117	0.0244559	0.0366838	0	0	0.0244559	0	0.0244559	0.110051	0.0244559	0.0244559	0.0978234	0.0244559	0	0.0244559	0	0.0244559	0	0.0271732
374	Firmicutes	Clostridia_1	Clostridiales	Ruminococcaceae	Ruminococcaceae_unclassified	0	0.0244559	0	0	0.0489117	0.0244559	0.0489117	0.0244559	0.0733676	0.0244559	0.0733676	0.0244559	0	0	0.0244559	0.0366838	0.0244559	0.0366838	0.0271732
385	Tenericutes	Mollicutes	RF9	RF9_unclassified	RF9_unclassified	0	0	0	0.0244559	0	0	0.0244559	0	0.0366838	0	0.0244559	0.0978234	0	0.0489117	0.0489117	0	0.0733676	0.110051	0.0271732
347	Proteobacteria	Alphaproteobacteria	Rhizobiales_1	Brucellaceae	Mycoplana	0	0.0244559	0	0.0489117	0	0.0489117	0	0	0.0733676	0.0244559	0.0244559	0	0.0489117	0.0978234	0.0244559	0.0733676	0	0	0.0271732
389	Bacteroidetes	Bacteroidia	Bacteroidales	Rikenellaceae	Alisitpes_IV	0.0489117	0.0244559	0.110051	0.0244559	0	0	0.0489117	0.0489117	0	0	0.0244559	0.0244559	0	0	0.0244559	0.0733676	0	0.0366838	0.0271732
353	Firmicutes	Bacilli	Lactobacillales	Lactobacillaceae	Lactobacillaceae_unclassified	0	0.0244559	0	0.0978234	0	0	0.0244559	0.0978234	0	0.0489117	0.0244559	0	0.0244559	0.0244559	0.0244559	0.0366838	0.0489117	0	0.0264938
362	Firmicutes	Clostridia_1	Clostridiales	Ruminococcaceae	Ruminococcaceae_unclassified	0.0978234	0.0489117	0.0366838	0.0489117	0.0733676	0	0.0733676	0.0489117	0	0	0.0244559	0	0	0	0.0244559	0	0	0	0.0264938
366	Firmicutes	Firmicutes_unclassified	Firmicutes_unclassified	Firmicutes_unclassified	Firmicutes_unclassified	0.0244559	0	0	0	0.0489117	0.0489117	0.0733676	0	0	0.0244559	0.0978234	0.0244559	0.0489117	0.0489117	0	0.0366838	0	0	0.0264938
380	Proteobacteria	Deltaproteobacteria	Desulfovibrionales	Desulfovibrionaceae	Gut_cluster_3	0.0733676	0	0.0366838	0.0244559	0	0	0.0244559	0.0489117	0	0.0244559	0	0.0489117	0.0244559	0	0.0733676	0.0733676	0.0244559	0	0.0264938
379	Proteobacteria	Deltaproteobacteria	Desulfovibrionales	Desulfovibrionaceae	Gut_cluster_3	0	0	0	0.0244559	0.0244559	0.0244559	0.0244559	0.0244559	0.0366838	0.0244559	0.0244559	0.0244559	0.0244559	0.0244559	0.0489117	0.0366838	0.0733676	0.0366838	0.0264938
388	Bacteroidetes	Bacteroidia	Bacteroidales	Porphyromonadaceae_Cluster_V	Porphyromonadaceae_Cluster_V_unclassified	0.0733676	0.0244559	0.110051	0.0489117	0	0	0.0489117	0.0244559	0	0	0	0	0.0733676	0	0	0.0733676	0	0	0.0264938
398	Proteobacteria	Alphaproteobacteria	Alphaproteobacteria_unclassified	Alphaproteobacteria_unclassified	Alphaproteobacteria_unclassified	0.0978234	0.0244559	0.0366838	0.0244559	0.0244559	0	0	0.0244559	0.0733676	0.0244559	0.0244559	0.0244559	0	0.0244559	0	0	0	0.0733676	0.0264938
384	Synergistetes	Synergistia	Synergistales	Synergistaceae	Candidatus_Tammella	0.0489117	0.0978234	0.0366838	0.0489117	0.0489117	0	0	0.0489117	0	0.0489117	0	0	0.0244559	0	0.0244559	0.0366838	0	0	0.0258145
370	Bacteroidetes	Bacteroidia	Bacteroidales	Porphyromonadaceae_2	Porphyromonadaceae_2_unclassified	0.0489117	0.122279	0.0366838	0.0244559	0	0.0733676	0.0244559	0	0.0366838	0.0244559	0	0.0733676	0	0	0	0	0	0	0.0258145
382	Proteobacteria	Deltaproteobacteria	Desulfovibrionales	Desulfovibrionaceae	Gut_cluster_3	0	0.0733676	0	0.0489117	0.0244559	0.0489117	0.0489117	0	0	0	0.0489117	0.0244559	0	0	0.0244559	0.0366838	0.0489117	0.0366838	0.0258145
372	Firmicutes	Clostridia_1	Clostridiales	Lachnospiraceae	Gut_cluster_13	0	0	0	0.0733676	0.0244559	0.0489117	0	0.0733676	0.0733676	0.0244559	0	0	0.0489117	0.0244559	0.0489117	0	0.0244559	0	0.0258145
376	Firmicutes	Firmicutes_unclassified	Firmicutes_unclassified	Firmicutes_unclassified	Firmicutes_unclassified	0.0733676	0	0	0	0	0.0489117	0.0978234	0.0489117	0.0366838	0.0489117	0.0244559	0.0244559	0	0.0244559	0	0.0366838	0	0	0.0258145
375	Firmicutes	Clostridia_2	Clostridiales_1	Peptococcaceae_1	Uncultured_2	0	0	0	0.0244559	0	0.0733676	0	0	0.0366838	0.0244559	0.0489117	0.0244559	0	0.195647	0	0.0366838	0	0	0.0258145
397	Firmicutes	Erysipelotrichi	Erysipelotrichales	Erysipelotrichaceae	Uncultured_3	0	0.0244559	0.0366838	0	0.0244559	0	0.0489117	0	0	0	0.0489117	0.0244559	0.0489117	0.0489117	0.0244559	0	0.0244559	0.110051	0.0258145
400	Proteobacteria	Deltaproteobacteria	Desulfovibrionales	Desulfovibrionaceae	Gut_cluster_3	0.122279	0	0.0733676	0.0733676	0.0244559	0.0244559	0	0	0	0	0.0244559	0	0	0.0489117	0	0.0733676	0	0	0.0258145
412	Planctomycetes	vadinHA49	Insect_cluster	Insect_cluster_unclassified	Insect_cluster_unclassified	0	0	0.0366838	0	0	0.0733676	0	0	0.110051	0.0244559	0	0.0244559	0.0489117	0	0	0	0.0733676	0.0733676	0.0258145
373	Firmicutes	Clostridia_1	Clostridiales	Lachnospiraceae	Gut_cluster_13	0.0244559	0.0489117	0.0366838	0.0489117	0.0244559	0	0.0489117	0	0	0.0244559	0.0733676	0.0978234	0	0.0244559	0	0	0	0	0.0251352
371	Firmicutes	Clostridia_1	Clostridiales	Clostridiales_unclassified	Clostridiales_unclassified	0	0	0	0.0489117	0.0733676	0.0489117	0.0244559	0	0.0366838	0	0.0489117	0	0	0.0489117	0.0489117	0	0.0733676	0	0.0251352
381	Proteobacteria	Deltaproteobacteria	Desulfovibrionales	Desulfovibrionaceae	Gut_cluster_3	0.0489117	0.0244559	0	0	0.0244559	0.0733676	0.0244559	0	0	0.0244559	0.0489117	0	0	0.0489117	0.0733676	0.0366838	0.0244559	0	0.0251352
399	Proteobacteria	Deltaproteobacteria	Desulfovibrionales	Desulfovibrionaceae	Desulfovibrionaceae_unclassified	0	0.0978234	0.0366838	0	0	0.0489117	0.0244559	0.0489117	0.0366838	0	0.0244559	0	0.0244559	0.0244559	0.0489117	0.0366838	0	0	0.0251352
429	Proteobacteria	Gammaproteobacteria	Xanthomonadales	Xanthomonadaceae	Pseudoxanthomonas	0.0244559	0.0244559	0	0.0244559	0	0	0.0489117	0	0	0.0244559	0.0244559	0	0.0244559	0	0	0	0	0.256787	0.0251352
369	Bacteroidetes	Bacteroidia	Bacteroidales	Porphyromonadaceae_1	Dysgonomonas	0	0.195647	0	0.0733676	0	0	0	0.146735	0	0	0	0	0.0244559	0	0	0	0	0	0.0244559
378	Proteobacteria	Alphaproteobacteria	Rhizobiales_2	Bradyrhizobiaceae	Bradyrhizobiaceae_unclassified	0.0489117	0.0244559	0	0.0489117	0	0.0489117	0.0978234	0	0	0	0	0.0244559	0.0489117	0	0.0733676	0	0.0244559	0	0.0244559
394	Firmicutes	Clostridia_1	Clostridiales	Ruminococcaceae	Termite_cockroach_cluster	0.0489117	0.0244559	0.0366838	0	0.0733676	0	0.0244559	0.0244559	0.0366838	0	0	0.0489117	0	0.0733676	0	0	0.0489117	0	0.0244559
402	Proteobacteria	Deltaproteobacteria	Desulfovibrionales	Desulfovibrionaceae	Gut_cluster_3	0.0489117	0.0244559	0.0366838	0.0733676	0	0	0.0244559	0.0244559	0.0366838	0.0489117	0.0244559	0	0.0733676	0.0244559	0	0	0	0	0.0244559
403	Synergistetes	Synergistia	Synergistales	Synergistaceae	Synergistaceae_unclassified	0.0978234	0	0	0.0244559	0	0.0244559	0	0.0733676	0	0.0489117	0	0	0.0733676	0	0	0.0366838	0.0244559	0.0366838	0.0244559
393	Firmicutes	Clostridia_1	Clostridiales	Ruminococcaceae	Ruminococcaceae_unclassified	0.0244559	0.0244559	0.0366838	0.0244559	0.0733676	0.0244559	0.0489117	0.0244559	0	0.0489117	0	0	0	0.0489117	0	0	0.0244559	0.0366838	0.0244559
392	Firmicutes	Clostridia_1	Clostridiales	Ruminococcaceae	Ruminococcaceae_unclassified	0	0.0244559	0	0.0244559	0.0244559	0.0489117	0	0	0.0733676	0	0.0978234	0.0244559	0.0244559	0.0244559	0	0	0	0.0733676	0.0244559
405	Firmicutes	Clostridia_1	Clostridiales	Family_XIII_Incertae_Sedis	Family_XIII_Incertae_Sedis_unclassified	0.0489117	0	0.0733676	0.0489117	0.0244559	0.0244559	0	0.0489117	0.0366838	0.0244559	0.0244559	0.0489117	0	0	0	0	0	0.0366838	0.0244559
414	Spirochaetes	Spirochaetes	Spirochaetales	Spirochaetaceae_Treponema_I	Spirochaetaceae_Treponema_I_unclassified	0.0489117	0	0	0.0489117	0.0489117	0.0489117	0	0	0	0.0244559	0	0.0244559	0.0244559	0	0.0244559	0.0733676	0	0.0733676	0.0244559
401	Proteobacteria	Deltaproteobacteria	Desulfovibrionales	Desulfovibrionaceae	Gut_cluster_3	0.0244559	0	0.0366838	0	0.0978234	0	0	0.0244559	0	0.0733676	0	0.0244559	0.0733676	0.0489117	0	0	0.0244559	0	0.0237765
386	Actinobacteria	Actinobacteria	Corynebacteriales	Mycobacteriaceae	Mycobacterium	0.0733676	0.0244559	0.0366838	0	0.0489117	0.0244559	0.0489117	0	0	0.0733676	0	0.0244559	0	0.0244559	0	0	0.0489117	0	0.0237765
390	Firmicutes	Bacilli	Lactobacillales	Lactobacillales_unclassified	Lactobacillales_unclassified	0.0244559	0	0.0366838	0.0244559	0	0.0244559	0.0489117	0.0489117	0	0.0978234	0.0244559	0	0.0244559	0.0244559	0.0489117	0	0	0	0.0237765
408	Firmicutes	Clostridia_1	Clostridiales	Ruminococcaceae	Incertae_Sedis_1	0.0244559	0.0733676	0	0.0244559	0.0244559	0	0.0244559	0	0.0366838	0	0	0.146735	0	0	0	0	0	0.0733676	0.0237765
470	Planctomycetes	Planctomycetacia	Planctomycetales	Planctomycetaceae	Pir4_lineage	0	0.0244559	0	0.0244559	0	0	0.0244559	0.0244559	0	0	0	0	0	0	0	0.0733676	0	0.256787	0.0237765
396	Firmicutes	Clostridia_1	Clostridiales	Ruminococcaceae	Uncultured_28	0.0978234	0.0244559	0	0.0244559	0	0.0244559	0.0244559	0	0	0.0244559	0	0.0244559	0.0489117	0.0244559	0	0	0.0978234	0	0.0230972
387	Bacteroidetes	Bacteroidia	Bacteroidales	Porphyromonadaceae_1	Dysgonomonas	0	0	0	0.0244559	0	0	0	0	0	0	0	0.0244559	0.0244559	0	0.195647	0	0.146735	0	0.0230972
391	Firmicutes	Clostridia_1	Clostridiales	Lachnospiraceae	Lachnospiraceae_unclassified	0.0489117	0.0489117	0	0.0244559	0.0489117	0.0489117	0.0244559	0.0244559	0	0.0733676	0.0244559	0	0.0244559	0.0244559	0	0	0	0	0.0230972
395	Firmicutes	Clostridia_1	Clostridiales	Ruminococcaceae	Termite_cockroach_cluster	0.0489117	0	0	0.0244559	0.0733676	0.0489117	0.0489117	0.0244559	0	0.0733676	0	0.0489117	0	0.0244559	0	0	0	0	0.0230972
409	Firmicutes	Clostridia_1	Clostridiales	Ruminococcaceae	Ruminococcaceae_unclassified	0	0.0978234	0	0	0.0733676	0	0.0244559	0.0244559	0	0	0.0244559	0.0489117	0	0	0.0489117	0.0733676	0	0	0.0230972
411	Firmicutes	Firmicutes_unclassified	Firmicutes_unclassified	Firmicutes_unclassified	Firmicutes_unclassified	0.0489117	0.0978234	0.0366838	0.0244559	0	0	0	0.0244559	0	0	0.0489117	0	0	0.0489117	0	0	0.0489117	0.0366838	0.0230972
410	Firmicutes	Clostridia_1	Clostridiales	Ruminococcaceae	Uncultured_28	0.0244559	0	0	0	0.0489117	0.0244559	0.0244559	0	0.0733676	0.0489117	0.0244559	0.0733676	0.0244559	0.0244559	0.0244559	0	0	0	0.0230972
419	Firmicutes	Bacilli	Bacillales	Bacillaceae	Bacillus_7	0	0.0244559	0	0	0	0	0	0	0	0.0244559	0.0244559	0.0244559	0.0489117	0.0244559	0	0.0366838	0.0978234	0.110051	0.0230972
420	Firmicutes	Bacilli	Lactobacillales	Lactobacillaceae	Lactobacillaceae_unclassified	0	0	0	0	0	0	0	0	0.0366838	0	0	0	0.122279	0.0733676	0	0.110051	0.0733676	0	0.0230972
418	Firmicutes	Bacilli	Bacillales	Bacillaceae	Bacillus_11	0	0	0	0	0.0244559	0.0244559	0	0.0244559	0	0	0	0.0244559	0	0	0.0244559	0.0366838	0.146735	0.110051	0.0230972
430	Verrucomicrobia	Spartobacteria	DA101_soil_group	DA101_soil_group_unclassified	DA101_soil_group_unclassified	0.0244559	0.0244559	0	0	0	0.0244559	0	0.0733676	0	0.0244559	0	0	0.0244559	0.0244559	0	0.110051	0.0489117	0.0366838	0.0230972
413	Proteobacteria	Betaproteobacteria	Betaproteobacteria_unclassified	Betaproteobacteria_unclassified	Betaproteobacteria_unclassified	0	0.0244559	0	0.0244559	0.0489117	0	0	0.0244559	0.0366838	0	0.0244559	0.0244559	0.0244559	0.0489117	0.0733676	0	0.0489117	0	0.0224179
406	Firmicutes	Clostridia_1	Clostridiales	Lachnospiraceae	Clostridium_piliforme_cluster	0.0489117	0.0489117	0.0366838	0.0244559	0.0244559	0.0489117	0.0489117	0.0244559	0	0.0244559	0	0	0.0244559	0.0244559	0.0244559	0	0	0	0.0224179
407	Firmicutes	Clostridia_1	Clostridiales	Lachnospiraceae	Termite_cluster	0.0244559	0	0.0366838	0	0.0244559	0.0244559	0.0489117	0.0244559	0	0.0489117	0.0489117	0.122279	0	0	0	0	0	0	0.0224179
427	Lentisphaerae	Lentisphaeria	Victivallales	Victivallaceae	Victivallis	0.0489117	0.0244559	0.0733676	0.0489117	0.0244559	0	0	0.0978234	0.0366838	0.0244559	0	0	0.0244559	0	0	0	0	0	0.0224179
421	Firmicutes	Bacilli	Lactobacillales	Leuconostocaceae	Weissella_1	0	0.0489117	0	0.0733676	0.0244559	0.0244559	0	0.0244559	0	0	0	0.0489117	0	0.0244559	0.0244559	0.110051	0	0	0.0224179
425	Firmicutes	Clostridia_1	Clostridiales	Ruminococcaceae	Ruminococcaceae_unclassified	0.0244559	0	0.110051	0.0489117	0.0244559	0.0244559	0	0.0489117	0	0.0244559	0	0.0733676	0	0.0244559	0	0	0	0	0.0224179
416	Actinobacteria	Actinobacteria	Propionibacteriales	Nocardioidaceae	Nocardioides	0	0	0	0.0244559	0.0244559	0.0733676	0.0244559	0.0489117	0.0366838	0.0244559	0.0244559	0.0244559	0	0	0.0244559	0.0366838	0	0.0366838	0.0224179
436	Deferribacteres	Deferribacteres	Deferribacterales	Deferribacteraceae	Mucispirillum	0.0489117	0.0489117	0.0366838	0	0	0.0244559	0.0489117	0	0.0733676	0	0	0.0244559	0.0244559	0	0	0.0733676	0	0	0.0224179
404	Firmicutes	Bacilli	Lactobacillales	Leuconostocaceae	Weissella_1	0.0244559	0.0978234	0	0.0733676	0.0244559	0.0244559	0.0244559	0.0489117	0	0.0244559	0.0244559	0	0	0	0	0	0.0244559	0	0.0217385
426	Firmicutes	Clostridia_1	Clostridiales	Ruminococcaceae	Ruminococcaceae_unclassified	0.0244559	0.0489117	0.0366838	0.0244559	0.0244559	0.0733676	0	0.0489117	0	0	0	0.0489117	0.0244559	0	0	0	0	0.0366838	0.0217385
417	Bacteroidetes	Bacteroidia	Bacteroidales	Rikenellaceae	Alistipes_II	0.0489117	0	0	0	0	0	0	0.0489117	0.0733676	0.0733676	0.0244559	0	0.0489117	0.0244559	0.0244559	0	0.0244559	0	0.0217385
434	Bacteroidetes	Bacteroidia	Bacteroidales	Porphyromonadaceae_1	Dysgonomonas	0	0.0244559	0	0	0	0	0.0244559	0	0	0	0	0	0.0244559	0	0	0.146735	0.171191	0	0.0217385
435	Bacteroidetes	Bacteroidia	Bacteroidales	Rikenellaceae	Alisitpes_IV	0	0.0244559	0.0733676	0	0.0489117	0	0.0244559	0.0489117	0.0733676	0.0244559	0.0244559	0	0	0	0.0489117	0	0	0	0.0217385
439	Firmicutes	Clostridia_1	Clostridiales	Family_XIII_Incertae_Sedis	Anaerovorax_1	0.0489117	0	0	0	0.0244559	0.0489117	0	0	0.0366838	0.0244559	0	0.0733676	0	0	0	0.110051	0.0244559	0	0.0217385
443	Firmicutes	Clostridia_1	Clostridiales	Lachnospiraceae	Lachnospiraceae_unclassified	0.0489117	0.0244559	0.0366838	0.0244559	0.0489117	0.0489117	0.0244559	0	0.110051	0.0244559	0	0	0	0	0	0	0	0	0.0217385
449	Proteobacteria	Alphaproteobacteria	Rhizobiales_2	Bradyrhizobiaceae	Bradyrhizobiaceae_unclassified	0.0244559	0	0.0366838	0.0244559	0	0.0489117	0	0	0	0.0244559	0.0244559	0.0489117	0	0	0.0244559	0	0.0244559	0.110051	0.0217385
464	Firmicutes	Clostridia_1	Clostridiales	Lachnospiraceae	Lachnospiraceae_unclassified	0	0	0	0	0	0	0	0	0	0	0	0	0	0	0	0.220103	0.171191	0	0.0217385
428	Planctomycetes	Planctomycetacia	Planctomycetales	Planctomycetaceae	Termite_cockroach_cluster_2	0	0	0	0	0	0.0244559	0	0.0244559	0	0.0244559	0.0733676	0.0489117	0.0489117	0	0.0244559	0.0366838	0.0733676	0	0.0210592
431	unknown	unknown_unclassified	unknown_unclassified	unknown_unclassified	unknown_unclassified	0.0978234	0.0489117	0.0366838	0.0733676	0	0.0244559	0.0489117	0.0244559	0	0	0	0.0244559	0	0	0	0	0	0	0.0210592
415	Actinobacteria	Actinobacteria	Actinobacteria_unclassified	Actinobacteria_unclassified	Actinobacteria_unclassified	0.0244559	0.0244559	0.0366838	0	0	0.0244559	0	0.0244559	0	0.0244559	0.0733676	0	0.0489117	0.0733676	0.0244559	0	0	0	0.0210592
423	Firmicutes	Clostridia_1	Clostridiales	Ruminococcaceae	Gut_cluster_7	0	0.0244559	0	0	0.0244559	0	0.0978234	0	0.0366838	0	0.0489117	0	0.0733676	0.0244559	0.0244559	0	0.0244559	0	0.0210592
422	Firmicutes	Clostridia_1	Clostridiales	Lachnospiraceae	Lachnospiraceae_unclassified	0.0244559	0	0	0	0	0	0.0733676	0.0489117	0.0366838	0	0	0	0.0244559	0.0244559	0	0	0.146735	0	0.0210592
424	Firmicutes	Clostridia_1	Clostridiales	Ruminococcaceae	Insect_cluster	0.0733676	0	0	0	0.0489117	0.0244559	0	0	0	0.0733676	0	0.0244559	0	0.0244559	0.0489117	0	0.0244559	0.0366838	0.0210592
441	Firmicutes	Clostridia_1	Clostridiales	Lachnospiraceae	Gut_cluster_13	0.0244559	0.0244559	0.0366838	0.0244559	0.0244559	0	0.0244559	0.0489117	0	0.0244559	0.0733676	0	0	0	0	0	0	0.0733676	0.0210592
445	Firmicutes	Clostridia_1	Clostridiales	Ruminococcaceae	Ruminococcaceae_unclassified	0.0244559	0	0.0733676	0.0733676	0.0489117	0	0	0.0244559	0	0	0.0244559	0.0244559	0	0.0489117	0	0	0	0.0366838	0.0210592
444	Firmicutes	Clostridia_1	Clostridiales	Lachnospiraceae	Lachnospiraceae_unclassified	0	0.0244559	0.0366838	0.0244559	0.0244559	0.0489117	0	0.0244559	0.0366838	0.0489117	0	0	0.0244559	0.0244559	0.0244559	0	0	0.0366838	0.0210592
433	Actinobacteria	Actinobacteria	Propionibacteriales	Nocardioidaceae	Nocardioides	0.0489117	0	0.0366838	0	0.0244559	0.0489117	0.0489117	0	0	0	0.0489117	0	0	0	0	0	0.0489117	0.0733676	0.0210592
472	Planctomycetes	Planctomycetacia	Planctomycetales	Planctomycetaceae	Termite_cockroach_cluster_2	0	0.0244559	0.0366838	0	0.0244559	0	0.0489117	0.0244559	0	0	0.0244559	0	0	0	0.0489117	0.0733676	0	0.0733676	0.0210592
458	Firmicutes	Bacilli	Lactobacillales	d63_751	d63_751_unclassified	0	0	0	0	0	0.0244559	0	0	0	0	0.0244559	0.0489117	0.0244559	0	0.0733676	0.146735	0	0.0366838	0.0210592
494	Planctomycetes	Planctomycetacia	Planctomycetales	Planctomycetaceae	Planctomycetaceae_unclassified	0	0.0244559	0.0366838	0.0244559	0	0	0.0244559	0	0	0	0	0	0.0489117	0	0	0.0733676	0	0.146735	0.0210592
446	Firmicutes	Clostridia_1	Clostridiales	Ruminococcaceae	Termite_cockroach_cluster	0.0489117	0.0489117	0	0	0.0244559	0.0489117	0	0.0244559	0.0366838	0	0.0244559	0.0244559	0.0244559	0	0	0	0.0244559	0.0366838	0.0203799
442	Firmicutes	Clostridia_1	Clostridiales	Lachnospiraceae	Lachnospiraceae_unclassified	0.0244559	0.0489117	0	0	0	0.0244559	0	0	0.0366838	0.0489117	0.0244559	0.0733676	0.0244559	0	0.0244559	0	0	0.0366838	0.0203799
432	Actinobacteria	Actinobacteria	Corynebacteriales	Tsukamurellaceae	Tsukamurella	0	0.0244559	0.0733676	0.0244559	0	0	0	0.0244559	0	0.0244559	0.0244559	0	0.0244559	0.122279	0.0244559	0	0	0	0.0203799
438	Firmicutes	Clostridia_1	Clostridiales	Clostridiales_unclassified	Clostridiales_unclassified	0	0	0.0733676	0	0.0244559	0.0733676	0	0.0978234	0	0	0.0244559	0.0244559	0.0244559	0	0.0244559	0	0	0	0.0203799
447	Firmicutes	Clostridia_2	Clostridiales_1	Peptococcaceae_1	Uncultured_2	0	0	0	0.0244559	0.0244559	0	0	0	0.0733676	0.0489117	0	0.0733676	0	0.0244559	0.0733676	0	0.0244559	0	0.0203799
451	Bacteroidetes	Bacteroidia	Bacteroidales	Bacteroidales_unclassified	Bacteroidales_unclassified	0	0	0	0	0	0	0	0.0244559	0.0733676	0.0244559	0.0733676	0.0244559	0.0244559	0	0	0	0.0489117	0.0733676	0.0203799
456	Bacteroidetes	Sphingobacteria	Sphingobacteriales_2	Chitinophagaceae	Chitinophaga	0	0	0	0	0	0	0	0.0733676	0	0.0244559	0.0733676	0	0.0244559	0	0.0244559	0	0	0.146735	0.0203799
454	Bacteroidetes	Bacteroidia	Bacteroidales	Porphyromonadaceae_Cluster_V	Termite_Cockroach_cluster	0.0489117	0	0.0733676	0.0244559	0	0	0.0489117	0.0244559	0	0	0	0	0	0	0.0244559	0.0366838	0.0489117	0.0366838	0.0203799
466	Firmicutes	Clostridia_1	Clostridiales	Ruminococcaceae	Ruminococcaceae_unclassified	0.0244559	0	0.0366838	0.0244559	0	0	0.0244559	0	0	0.0489117	0.0244559	0	0.0244559	0.0244559	0	0.0366838	0.0244559	0.0733676	0.0203799
467	Firmicutes	Clostridia_1	Clostridiales	Ruminococcaceae	Termite_cockroach_cluster	0.0489117	0.0244559	0.0366838	0.0244559	0	0.0733676	0	0.0244559	0.0733676	0	0.0244559	0	0	0	0	0	0	0.0366838	0.0203799
437	Firmicutes	Clostridia_1	Clostridiales	Clostridiales_unclassified	Clostridiales_unclassified	0	0.0489117	0	0	0.0244559	0.0733676	0.0489117	0.0489117	0	0	0.0489117	0	0	0.0244559	0	0	0	0.0366838	0.0197006
474	Proteobacteria	Gammaproteobacteria_1	Pseudomonadales	Pseudomonadaceae	Pseudomonas_2	0	0.0489117	0.0366838	0.0489117	0	0.0733676	0	0	0.0366838	0.0244559	0	0	0.0489117	0	0	0	0	0.0366838	0.0197006
450	Actinobacteria	Actinobacteria	Corynebacteriales	Nocardiaceae_1	Gordonia	0.0244559	0.0244559	0.110051	0.0244559	0.0244559	0	0.0244559	0.0244559	0	0.0489117	0.0489117	0	0	0	0	0	0	0	0.0197006
468	Firmicutes	Clostridia_1	Clostridiales	Ruminococcaceae	Uncultured_12	0	0.0244559	0.0733676	0	0	0	0	0.0244559	0	0	0	0.146735	0	0.0489117	0	0	0	0.0366838	0.0197006
488	Firmicutes	Clostridia_1	Clostridiales	Ruminococcaceae	Uncultured_28	0	0.0489117	0.0366838	0	0	0	0.0489117	0	0.0366838	0	0	0.0244559	0	0.0489117	0	0.0366838	0	0.0733676	0.0197006
476	Bacteroidetes	Bacteroidia	Bacteroidales	Bacteroidales_unclassified	Bacteroidales_unclassified	0	0	0	0	0	0	0	0.0244559	0	0	0	0.0244559	0.0244559	0.0978234	0	0.0366838	0	0.146735	0.0197006
479	Cyanobacteria	Cyanobacteria	Cyanobacteriales	C0d-2	C0d-2_unclassified	0	0	0	0.0489117	0	0.0244559	0	0.0244559	0	0	0.0244559	0	0	0	0.0244559	0.146735	0.0244559	0.0366838	0.0197006
440	Firmicutes	Clostridia_1	Clostridiales	Lachnospiraceae	Gut_cluster_13	0	0.0244559	0	0.0244559	0.0489117	0	0.0244559	0.0244559	0	0.0244559	0.0489117	0.0244559	0.0244559	0.0244559	0	0	0.0489117	0	0.0190212
448	Proteobacteria	Alphaproteobacteria	Alphaproteobacteria_unclassified	Alphaproteobacteria_unclassified	Alphaproteobacteria_unclassified	0	0	0	0.0244559	0	0	0	0.0244559	0	0	0	0	0.0244559	0	0.122279	0	0.146735	0	0.0190212
465	Firmicutes	Clostridia_1	Clostridiales	Ruminococcaceae	Ruminococcaceae_unclassified	0	0.0244559	0.0366838	0.0244559	0.0489117	0	0.0244559	0	0	0	0.0489117	0.0489117	0.0244559	0	0.0244559	0	0	0.0366838	0.0190212
471	Planctomycetes	Planctomycetacia	Planctomycetales	Planctomycetaceae	Planctomycetaceae_unclassified	0.0733676	0	0	0	0.0489117	0.0244559	0	0	0	0	0.0733676	0.0489117	0	0	0	0.0366838	0	0.0366838	0.0190212
461	Firmicutes	Clostridia_1	Clostridiales	Lachnospiraceae	Gut_cluster_13	0.0244559	0	0	0.0244559	0.0244559	0.0489117	0.0244559	0	0.0733676	0	0	0.0489117	0	0.0244559	0.0244559	0	0.0244559	0	0.0190212
496	Proteobacteria	Alphaproteobacteria	Rhodobacterales	Rhodobacteraceae_1	Paracoccus_1	0.0489117	0	0	0.0733676	0	0	0	0	0	0	0	0.0244559	0.0489117	0	0	0	0	0.146735	0.0190212
455	Bacteroidetes	Bacteroidia	Bacteroidales	Rikenellaceae	Rikenellaceae_unclassified	0	0	0.0366838	0.122279	0.0244559	0	0	0.0244559	0	0.0244559	0	0	0	0	0.0244559	0	0.0733676	0	0.0183419
453	Bacteroidetes	Bacteroidia	Bacteroidales	Porphyromonadaceae_Cluster_V	Mixed_gut_cluster	0.0244559	0.0244559	0	0.0244559	0	0	0.0489117	0.0244559	0	0.0489117	0	0	0.0244559	0	0	0.0366838	0.0733676	0	0.0183419
462	Firmicutes	Clostridia_1	Clostridiales	Lachnospiraceae	Gut_cluster_15	0.0244559	0.0733676	0	0	0	0.0244559	0.0244559	0	0.0366838	0.0733676	0.0244559	0.0244559	0	0	0.0244559	0	0	0	0.0183419
463	Firmicutes	Clostridia_1	Clostridiales	Lachnospiraceae	Lachnospiraceae_unclassified	0	0.0489117	0	0.0244559	0.0489117	0.0244559	0.0489117	0	0	0	0	0	0	0.0244559	0.0489117	0.0366838	0.0244559	0	0.0183419
457	Deferribacteres	Deferribacteres	Deferribacterales	Deferribacteraceae	Mucispirillum	0	0.0489117	0	0.0244559	0	0.0489117	0.0489117	0	0	0.0244559	0.0244559	0.0244559	0	0.0244559	0.0244559	0.0366838	0	0	0.0183419
473	Proteobacteria	Alphaproteobacteria	Rhizobiales_2	Bradyrhizobiaceae	Bradyrhizobiaceae_unclassified	0.0489117	0	0.0366838	0	0.0244559	0	0.122279	0.0244559	0	0	0.0244559	0	0	0.0489117	0	0	0	0	0.0183419
481	Firmicutes	Bacilli	Lactobacillales	Lactobacillales_unclassified	Lactobacillales_unclassified	0	0.0244559	0	0.0244559	0	0.0244559	0.0489117	0.0244559	0	0	0	0	0.0244559	0	0.0244559	0.0366838	0.0244559	0.0733676	0.0183419
483	Firmicutes	Clostridia_1	Clostridiales	Clostridiales_unclassified	Clostridiales_unclassified	0.0244559	0.0244559	0	0	0.0733676	0	0.0244559	0	0	0	0	0.0244559	0	0.0244559	0	0	0.0244559	0.110051	0.0183419
491	Firmicutes	Firmicutes_unclassified	Firmicutes_unclassified	Firmicutes_unclassified	Firmicutes_unclassified	0.0244559	0	0.0733676	0	0.0489117	0	0.0489117	0.0244559	0	0	0.0489117	0	0.0244559	0	0	0	0	0.0366838	0.0183419
558	Firmicutes	Firmicutes_unclassified	Firmicutes_unclassified	Firmicutes_unclassified	Firmicutes_unclassified	0	0	0	0	0	0	0	0	0	0	0.0244559	0	0.0244559	0	0.0244559	0.0366838	0	0.220103	0.0183419
561	Proteobacteria	Betaproteobacteria	Burkholderiales	Alcaligenaceae_1	Castellaniella	0	0	0	0	0	0	0	0	0	0.0244559	0	0	0	0	0.0489117	0	0	0.256787	0.0183419
459	Firmicutes	Clostridia_1	Clostridiales	Clostridiales_unclassified	Clostridiales_unclassified	0	0	0	0	0	0.0489117	0	0.0244559	0	0.0733676	0	0.0244559	0	0.0244559	0	0	0.122279	0	0.0176626
452	Bacteroidetes	Bacteroidia	Bacteroidales	Bacteroidales_unclassified	Bacteroidales_unclassified	0	0	0	0.0244559	0	0.0244559	0.0978234	0	0	0.0489117	0.0244559	0.0244559	0.0733676	0	0	0	0	0	0.0176626
469	Firmicutes	Firmicutes_unclassified	Firmicutes_unclassified	Firmicutes_unclassified	Firmicutes_unclassified	0	0	0	0	0.0978234	0.0244559	0	0.0244559	0	0.0489117	0.0244559	0.0489117	0	0.0489117	0	0	0	0	0.0176626
489	Firmicutes	Clostridia_2	Clostridiales	Syntrophomonadaceae	Syntrophomonadaceae_unclassified	0.0978234	0.0978234	0.0733676	0	0	0	0	0	0	0	0.0244559	0	0.0244559	0	0	0	0	0	0.0176626
486	Firmicutes	Clostridia_1	Clostridiales	Ruminococcaceae	Ruminococcaceae_unclassified	0.0244559	0.0244559	0	0.0244559	0	0	0	0	0	0	0.0244559	0.0244559	0.0489117	0	0.0244559	0.0366838	0.0489117	0.0366838	0.0176626
460	Firmicutes	Clostridia_1	Clostridiales	Lachnospiraceae	Candidatus_Arthromitus	0	0.0244559	0	0.0489117	0.0244559	0.0244559	0.0244559	0	0.0366838	0	0	0	0	0	0	0.0366838	0.0978234	0	0.0176626
484	Firmicutes	Clostridia_1	Clostridiales	Lachnospiraceae	Gut_cluster_13	0.0244559	0	0.0366838	0.0489117	0.0244559	0.0244559	0	0.0489117	0.0366838	0	0.0733676	0	0	0	0	0	0	0	0.0176626
487	Firmicutes	Clostridia_1	Clostridiales	Ruminococcaceae	Ruminococcaceae_unclassified	0.0244559	0.0244559	0	0.0244559	0.0244559	0.0244559	0	0	0.0366838	0	0.0244559	0.0244559	0	0	0.0244559	0	0.0489117	0.0366838	0.0176626
493	Planctomycetes	Planctomycetacia	Planctomycetales	Planctomycetaceae	Planctomycetaceae_unclassified	0.0244559	0.0244559	0.0366838	0.0244559	0	0.0244559	0	0.0489117	0	0	0.0244559	0.0244559	0	0.0244559	0.0244559	0	0	0.0366838	0.0176626
498	Proteobacteria	Gammaproteobacteria_1	Pseudomonadales	Moraxellaceae	Uncultured_2	0	0	0.0366838	0.0244559	0	0	0	0.0244559	0	0.0978234	0	0	0	0	0.0244559	0	0.0733676	0.0366838	0.0176626
497	Proteobacteria	Deltaproteobacteria	Desulfovibrionales	Desulfovibrionaceae	Desulfovibrionaceae_unclassified	0	0.0489117	0	0	0	0.0244559	0	0	0	0.0978234	0	0	0	0	0.0733676	0.0366838	0	0.0366838	0.0176626
538	Firmicutes	Clostridia_1	Clostridiales	Lachnospiraceae	Gut_cluster_13	0.0733676	0	0.110051	0	0.0244559	0	0	0	0	0	0	0	0	0	0	0.0366838	0	0.0733676	0.0176626
482	Firmicutes	Clostridia_1	Clostridiales	Clostridiales_unclassified	Clostridiales_unclassified	0.0244559	0.0733676	0.0366838	0.0489117	0.0244559	0	0.0489117	0.0489117	0	0	0	0	0	0	0	0	0	0	0.0169832
490	Firmicutes	Erysipelotrichi	Erysipelotrichales	Erysipelotrichaceae	Erysipelotrichaceae_unclassified	0	0.0244559	0	0.0733676	0.0489117	0	0.0244559	0	0.0366838	0	0	0.0244559	0.0244559	0	0.0489117	0	0	0	0.0169832
477	Bacteroidetes	Bacteroidia	Bacteroidales	Porphyromonadaceae_3	Tannerella	0	0	0	0.0244559	0	0	0.0489117	0	0	0.0244559	0.0244559	0	0.0244559	0.0244559	0.0489117	0	0.0489117	0.0366838	0.0169832
515	Firmicutes	Clostridia_1	Clostridiales	Ruminococcaceae	Gut_cluster_7	0	0	0	0.0244559	0	0	0	0.0733676	0	0	0	0	0.0244559	0.0244559	0	0.0366838	0.0489117	0.0733676	0.0169832
503	Firmicutes	Bacilli	Lactobacillales	Lactobacillales_unclassified	Lactobacillales_unclassified	0.0244559	0	0.0733676	0.0489117	0	0	0	0.0244559	0	0.0244559	0.0244559	0	0.0489117	0	0	0.0366838	0	0	0.0169832
522	Proteobacteria	Proteobacteria_unclassified	Proteobacteria_unclassified	Proteobacteria_unclassified	Proteobacteria_unclassified	0	0	0	0.0244559	0	0	0.0244559	0	0	0	0	0	0.0733676	0.0244559	0.0244559	0.110051	0.0244559	0	0.0169832
507	Firmicutes	Clostridia_1	Clostridiales	Clostridiales_unclassified	Clostridiales_unclassified	0	0	0	0	0.0244559	0.0244559	0	0.0244559	0	0	0.0244559	0.0244559	0.0244559	0.0244559	0	0.0733676	0.0244559	0.0366838	0.0169832
510	Firmicutes	Clostridia_1	Clostridiales	Lachnospiraceae	Gut_cluster_14	0	0	0.0733676	0.0489117	0	0	0.0244559	0.0489117	0.0366838	0.0244559	0	0.0244559	0	0	0	0	0.0244559	0	0.0169832
495	Proteobacteria	Alphaproteobacteria	Rhizobiales_2	Rhizobiales_2_unclassified	Rhizobiales_2_unclassified	0	0	0	0.0244559	0	0.0489117	0	0	0.0733676	0	0.0244559	0	0.0489117	0.0244559	0.0244559	0	0	0.0366838	0.0169832
542	Firmicutes	Clostridia_1	Clostridiales	Lachnospiraceae	Lachnospiraceae_unclassified	0.0244559	0	0.0733676	0	0	0	0	0	0	0	0	0.0244559	0.0244559	0	0.0244559	0	0.0244559	0.110051	0.0169832
478	Bacteroidetes	Bacteroidia	Bacteroidales	Rikenellaceae	Alisitpes_IV	0.0978234	0.0489117	0	0.0244559	0.0244559	0	0	0.0244559	0	0	0	0.0244559	0	0.0244559	0	0	0.0244559	0	0.0163039
480	Firmicutes	Bacilli	Lactobacillales	Lactobacillales_unclassified	Lactobacillales_unclassified	0.0244559	0.0244559	0	0	0	0.0244559	0.0244559	0	0	0.0244559	0.0489117	0.0244559	0.0489117	0	0.0489117	0	0	0	0.0163039
485	Firmicutes	Clostridia_1	Clostridiales	Ruminococcaceae	Ruminococcaceae_unclassified	0.0733676	0.0244559	0	0	0.0489117	0.0489117	0.0244559	0.0244559	0	0.0244559	0	0	0	0	0.0244559	0	0	0	0.0163039
517	Firmicutes	Clostridia_1	Clostridiales	Ruminococcaceae	Ruminococcaceae_unclassified	0	0.0733676	0.0366838	0	0	0	0	0	0	0	0.0244559	0.0244559	0.0244559	0	0	0.0366838	0.0733676	0	0.0163039
501	Bacteroidetes	Bacteroidia	Bacteroidales	Rikenellaceae	Rikenellaceae_unclassified	0.0244559	0.0244559	0	0	0	0	0	0.0489117	0.0733676	0.0244559	0	0.0244559	0.0244559	0.0244559	0	0	0.0244559	0	0.0163039
502	Firmicutes	Bacilli	Bacilli_unclassified	Bacilli_unclassified	Bacilli_unclassified	0	0.0244559	0.0366838	0	0	0.0244559	0	0	0	0.0733676	0.0489117	0	0.0244559	0	0	0.0366838	0.0244559	0	0.0163039
512	Firmicutes	Clostridia_1	Clostridiales	Lachnospiraceae	Lachnospiraceae_unclassified	0	0.0244559	0	0	0.0244559	0	0.0244559	0	0	0.0244559	0	0.0489117	0.0244559	0.0489117	0	0.0733676	0	0	0.0163039
516	Firmicutes	Clostridia_1	Clostridiales	Ruminococcaceae	Insect_cluster	0	0	0	0.0244559	0	0	0	0	0.0366838	0.0489117	0.0489117	0.0244559	0.0244559	0.0244559	0	0	0.0244559	0.0366838	0.0163039
518	Firmicutes	Clostridia_1	Clostridiales	Ruminococcaceae	Termite_cockroach_cluster	0	0	0.0366838	0.0244559	0.0489117	0	0.0244559	0.0244559	0.0366838	0	0	0	0.0244559	0.0244559	0.0244559	0	0.0244559	0	0.0163039
511	Firmicutes	Clostridia_1	Clostridiales	Lachnospiraceae	Lachnospiraceae_unclassified	0	0	0	0.0244559	0.0489117	0.0489117	0	0	0.0733676	0.0244559	0.0244559	0.0244559	0	0	0	0	0.0244559	0	0.0163039
523	Actinobacteria	Actinobacteria	Corynebacteriales	Corynebacteriales_unclassified	Corynebacteriales_unclassified	0.0244559	0.0244559	0.146735	0.0733676	0	0	0	0	0	0	0	0	0	0.0244559	0	0	0	0	0.0163039
524	Actinobacteria	Actinobacteria	Micrococcales_3	Microbacteriaceae	Agromyces_2	0	0.0244559	0.146735	0	0	0	0	0	0	0.0244559	0.0244559	0	0	0.0244559	0.0244559	0	0.0244559	0	0.0163039
541	Firmicutes	Clostridia_1	Clostridiales	Lachnospiraceae	Gut_cluster_13	0	0	0.0366838	0	0	0	0	0	0	0	0.0733676	0	0	0.0244559	0.0489117	0.0366838	0	0.0733676	0.0163039
551	Firmicutes	Clostridia_1	Clostridiales	Ruminococcaceae	Insect_cluster	0	0	0	0.0244559	0	0.0244559	0	0	0.0366838	0.0244559	0	0	0.0489117	0	0.0244559	0.0733676	0	0.0366838	0.0163039
500	Bacteroidetes	Bacteroidia	Bacteroidales	Porphyromonadaceae_Cluster_V	Porphyromonadaceae_Cluster_V_unclassified	0	0.0733676	0	0	0	0.0244559	0.0244559	0.0489117	0	0	0.0244559	0.0244559	0.0244559	0	0	0.0366838	0	0	0.0156246
520	Firmicutes	Firmicutes_unclassified	Firmicutes_unclassified	Firmicutes_unclassified	Firmicutes_unclassified	0.0244559	0.0244559	0	0	0.0978234	0	0.0244559	0.0244559	0.0366838	0	0	0.0244559	0.0244559	0	0	0	0	0	0.0156246
499	Bacteroidetes	Bacteroidia	Bacteroidales	Porphyromonadaceae_3	Porphyromonadaceae_3_unclassified	0	0	0	0	0.0244559	0	0.0244559	0.0489117	0	0.0244559	0.0244559	0.0244559	0.0244559	0.0489117	0	0.0366838	0	0	0.0156246
505	Firmicutes	Clostridia_1	Clostridiales	Clostridiales_unclassified	Clostridiales_unclassified	0.0244559	0.0244559	0	0.0244559	0.0244559	0	0.0244559	0	0	0.0244559	0	0.0489117	0	0	0	0.0366838	0.0489117	0	0.0156246
508	Firmicutes	Clostridia_1	Clostridiales	Lachnospiraceae	Gut_cluster_13	0	0.0244559	0	0.0244559	0.0244559	0.0244559	0	0	0.0366838	0	0.0244559	0	0	0.0244559	0.0978234	0	0	0	0.0156246
514	Firmicutes	Clostridia_1	Clostridiales	Ruminococcaceae	Gut_cluster_6	0	0	0	0	0.0244559	0.0244559	0.0489117	0	0.0366838	0	0.0489117	0	0.0244559	0.0244559	0	0	0.0489117	0	0.0156246
506	Firmicutes	Clostridia_1	Clostridiales	Clostridiales_unclassified	Clostridiales_unclassified	0.0489117	0	0	0	0	0.0244559	0.0244559	0.0244559	0	0	0.0244559	0	0.0244559	0.0489117	0.0244559	0	0	0.0366838	0.0156246
556	Firmicutes	Clostridia_2	Clostridiales_1	Peptococcaceae_1	Uncultured_2	0.0244559	0.0244559	0.0366838	0	0	0	0.0489117	0	0.0366838	0	0	0	0.0244559	0	0	0.0366838	0.0489117	0	0.0156246
528	Bacteroidetes	Bacteroidetes_unclassified	Bacteroidetes_unclassified	Bacteroidetes_unclassified	Bacteroidetes_unclassified	0	0.0244559	0.0366838	0	0	0	0	0	0.0733676	0.0489117	0.0244559	0	0	0.0489117	0	0	0.0244559	0	0.0156246
586	Firmicutes	Clostridia_1	Clostridiales	Ruminococcaceae	Ruminococcaceae_unclassified	0	0.0244559	0	0	0.0244559	0	0	0.0244559	0.0366838	0	0	0.0244559	0	0	0	0.0733676	0	0.0733676	0.0156246
596	Proteobacteria	Gammaproteobacteria_2	Legionellales	Coxiellaceae	Coxiella	0	0	0.0366838	0	0	0.0244559	0.0489117	0.0244559	0.0733676	0	0	0	0	0	0	0	0	0.0733676	0.0156246
504	Firmicutes	Bacilli	Lactobacillales	Lactobacillales_unclassified	Lactobacillales_unclassified	0	0.0244559	0	0	0	0	0	0.0733676	0	0.0244559	0.0489117	0	0.0489117	0.0489117	0	0	0	0	0.0149452
519	Firmicutes	Clostridia_2	Clostridiales_1	Peptococcaceae_1	Uncultured_2	0	0	0	0	0.0244559	0	0	0.0489117	0	0	0.0489117	0.0489117	0.0244559	0.0489117	0.0244559	0	0	0	0.0149452
521	Proteobacteria	Deltaproteobacteria	Desulfobacterales	Desulfobacteraceae	Desulfobacteraceae_unclassified	0	0	0	0	0	0	0.0489117	0.0244559	0	0.0244559	0	0.146735	0	0	0.0244559	0	0	0	0.0149452
513	Firmicutes	Clostridia_1	Clostridiales	Lachnospiraceae	Lachnospiraceae_unclassified	0.0244559	0	0	0	0	0.0244559	0.0489117	0	0	0.0244559	0	0.0244559	0.0489117	0	0.0733676	0	0	0	0.0149452
534	Firmicutes	Bacilli	Lactobacillales	Lactobacillales_unclassified	Lactobacillales_unclassified	0.0244559	0.0733676	0	0.0244559	0	0	0	0.0244559	0	0	0.0244559	0	0	0.0244559	0	0.0366838	0	0.0366838	0.0149452
525	Actinobacteria	Actinobacteria	Micrococcales_3	Microbacteriaceae	Microbacteriaceae_unclassified	0.0244559	0.0244559	0	0.0244559	0	0	0	0.0244559	0	0	0.0733676	0	0.0244559	0	0	0.0733676	0	0	0.0149452
562	unknown	unknown_unclassified	unknown_unclassified	unknown_unclassified	unknown_unclassified	0.0244559	0.0489117	0.0366838	0	0.0244559	0	0.0244559	0	0	0	0.0244559	0.0244559	0.0244559	0	0	0	0	0.0366838	0.0149452
537	Firmicutes	Clostridia_1	Clostridiales	Clostridiales_unclassified	Clostridiales_unclassified	0.0489117	0.0244559	0.0366838	0	0.0244559	0	0	0	0	0.0244559	0.0489117	0	0.0244559	0	0	0	0	0.0366838	0.0149452
550	Firmicutes	Clostridia_1	Clostridiales	Ruminococcaceae	Hydrogenoanaerobacterium	0.0244559	0.0244559	0	0	0.0489117	0	0.0244559	0.0244559	0.0366838	0	0.0244559	0.0244559	0	0	0	0.0366838	0	0	0.0149452
560	Proteobacteria	Alphaproteobacteria	Rhizobiales_1	Hyphomicrobiaceae	Devosia-Prosthecomicrobium	0.0733676	0.0244559	0	0.0244559	0	0.0244559	0	0.0244559	0	0	0.0244559	0	0	0	0	0	0	0.0733676	0.0149452
555	Firmicutes	Clostridia_1	Clostridiales	Ruminococcaceae	Uncultured_28	0	0	0	0	0.0244559	0.0244559	0.0244559	0.0244559	0	0.0244559	0.0489117	0	0.0244559	0	0	0	0	0.0733676	0.0149452
527	Actinobacteria	Actinobacteria	Propionibacteriales	Nocardioidaceae	Nocardioidaceae_unclassified	0.0733676	0.0489117	0.0366838	0.0244559	0	0	0	0.0244559	0	0	0	0	0.0244559	0	0.0244559	0	0	0	0.0142659
536	Firmicutes	Clostridia_1	Clostridiales	Clostridiales_unclassified	Clostridiales_unclassified	0	0	0	0	0	0	0	0.0244559	0	0	0.0489117	0	0.0244559	0	0	0.0366838	0.122279	0	0.0142659
531	Elusimicrobia	Elusimicrobia	Endomicrobiales	Endomicrobiaceae	Endomicrobium	0	0	0	0.0244559	0.0244559	0	0.0244559	0	0	0	0	0.0489117	0.0489117	0	0	0	0.0489117	0.0366838	0.0142659
530	Bacteroidetes	Bacteroidia	Bacteroidales	Porphyromonadaceae_1	Dysgonomonas	0	0	0	0.0489117	0	0	0	0	0	0.0244559	0	0	0	0	0	0	0.146735	0.0366838	0.0142659
475	Synergistetes	Synergistia	Synergistales	Synergistaceae	Termite_cockroach_cluster	0.0489117	0	0	0.0244559	0	0.0489117	0	0	0.0366838	0	0.0244559	0	0.0489117	0	0	0	0.0244559	0	0.0142659
539	Firmicutes	Clostridia_1	Clostridiales	Lachnospiraceae	Gut_cluster_13	0	0	0	0.0244559	0.0733676	0.0244559	0	0	0	0	0.0489117	0.0244559	0	0	0	0	0.0244559	0.0366838	0.0142659
543	Firmicutes	Clostridia_1	Clostridiales	Lachnospiraceae	Lachnospiraceae_unclassified	0.0244559	0.0244559	0.0366838	0	0.0489117	0	0.0244559	0	0	0.0244559	0.0244559	0	0.0244559	0	0.0244559	0	0	0	0.0142659
547	Firmicutes	Clostridia_1	Clostridiales	Ruminococcaceae	Anaerotruncus	0.0733676	0	0.0366838	0.0244559	0	0.0244559	0	0.0733676	0	0	0	0.0244559	0	0	0	0	0	0	0.0142659
509	Firmicutes	Clostridia_1	Clostridiales	Lachnospiraceae	Gut_cluster_13	0	0.0489117	0	0	0.0244559	0	0.0733676	0.0244559	0	0	0	0	0	0.0244559	0.0244559	0	0	0.0366838	0.0142659
532	Firmicutes	Bacilli	Bacilli_unclassified	Bacilli_unclassified	Bacilli_unclassified	0.0244559	0	0	0	0.0244559	0.0244559	0.0244559	0.0244559	0	0.0244559	0.0244559	0	0	0	0	0	0.0489117	0.0366838	0.0142659
545	Firmicutes	Clostridia_1	Clostridiales	Lachnospiraceae	Lachnospiraceae_unclassified	0	0.0244559	0.0366838	0.0244559	0.0244559	0	0.0244559	0	0	0.0244559	0	0	0	0.0978234	0	0	0	0	0.0142659
548	Firmicutes	Clostridia_1	Clostridiales	Ruminococcaceae	Gut_cluster_7	0	0.0244559	0	0	0.0244559	0.0244559	0	0	0	0.0244559	0	0.0489117	0	0.0489117	0.0244559	0	0	0.0366838	0.0142659
540	Firmicutes	Clostridia_1	Clostridiales	Lachnospiraceae	Gut_cluster_13	0.0244559	0	0	0.0244559	0	0.0489117	0	0	0	0.0244559	0	0	0.0244559	0.0244559	0	0.0366838	0.0489117	0	0.0142659
552	Firmicutes	Clostridia_1	Clostridiales	Ruminococcaceae	Ruminococcaceae_unclassified	0.0489117	0	0	0	0	0	0.0489117	0	0	0.0489117	0	0	0	0.0244559	0	0.0366838	0.0489117	0	0.0142659
546	Firmicutes	Clostridia_1	Clostridiales	Lachnospiraceae	Lachnospiraceae_unclassified	0	0	0	0	0	0.0733676	0.0733676	0	0.0366838	0.0244559	0.0244559	0	0.0244559	0	0	0	0	0	0.0142659
529	Bacteroidetes	Bacteroidia	Bacteroidales	Bacteroidales_unclassified	Bacteroidales_unclassified	0	0	0	0.0489117	0	0	0	0.0244559	0	0	0	0.0489117	0.0244559	0.0244559	0	0	0.0733676	0	0.0135866
544	Firmicutes	Clostridia_1	Clostridiales	Lachnospiraceae	Lachnospiraceae_unclassified	0	0.0244559	0	0	0.0489117	0	0.0244559	0	0	0	0	0.0733676	0.0244559	0	0.0489117	0	0	0	0.0135866
553	Firmicutes	Clostridia_1	Clostridiales	Ruminococcaceae	Ruminococcaceae_unclassified	0.0244559	0	0	0	0.0489117	0.0244559	0	0	0	0.0244559	0	0	0.0733676	0	0.0244559	0	0.0244559	0	0.0135866
554	Firmicutes	Clostridia_1	Clostridiales	Ruminococcaceae	Termite_cockroach_cluster	0.0733676	0.0244559	0	0	0	0	0	0	0	0.0244559	0.0489117	0	0	0	0.0244559	0	0.0489117	0	0.0135866
526	Actinobacteria	Actinobacteria	Propionibacteriales	Nocardioidaceae	Aeromicrobium	0.0733676	0	0	0.0489117	0	0.0244559	0	0	0	0.0244559	0	0	0.0489117	0	0.0244559	0	0	0	0.0135866
533	Firmicutes	Bacilli	Lactobacillales	Lactobacillales_unclassified	Lactobacillales_unclassified	0.0244559	0.0489117	0	0	0	0.0733676	0	0.0244559	0	0	0	0	0.0489117	0	0.0244559	0	0	0	0.0135866
535	Firmicutes	Clostridia_1	Clostridiales	Clostridiales_unclassified	Clostridiales_unclassified	0.0244559	0.0244559	0	0.0244559	0	0	0.0244559	0	0	0.0244559	0.0244559	0.0244559	0	0.0244559	0.0489117	0	0	0	0.0135866
559	Lentisphaerae	Lentisphaeria	Victivallales	Victivallaceae	Victivallis	0.0489117	0	0	0.0244559	0	0.0244559	0	0.0733676	0	0	0	0.0244559	0	0.0244559	0.0244559	0	0	0	0.0135866
584	Firmicutes	Clostridia_1	Clostridiales	Ruminococcaceae	Ruminococcaceae_unclassified	0	0.0244559	0	0.0244559	0.0489117	0	0	0	0	0	0.0244559	0	0	0	0	0.0733676	0.0489117	0	0.0135866
570	Bacteroidetes	Bacteroidia	Bacteroidales	Porphyromonadaceae_2	Porphyromonadaceae_2_unclassified	0	0.0244559	0	0	0.0244559	0	0	0	0.0366838	0.0244559	0	0	0.0489117	0.0489117	0	0	0	0.0366838	0.0135866
571	Bacteroidetes	Bacteroidia	Bacteroidales	Porphyromonadaceae_2	Termite_cluster_3	0.0489117	0.0244559	0.0366838	0	0.0244559	0	0.0244559	0.0244559	0.0366838	0	0	0.0244559	0	0	0	0	0	0	0.0135866
565	Actinobacteria	Actinobacteria	Micrococcales_3	Cellulomonadaceae	Cellulomonas_1	0.0244559	0.0489117	0.0733676	0	0.0244559	0.0489117	0	0	0	0	0.0244559	0	0	0	0	0	0	0	0.0135866
579	Firmicutes	Clostridia_1	Clostridiales	Lachnospiraceae	Lachnospiraceae_unclassified	0.0244559	0	0	0	0	0	0.0244559	0	0	0	0	0.0244559	0.0244559	0	0.0244559	0.0733676	0.0489117	0	0.0135866
583	Firmicutes	Clostridia_1	Clostridiales	Ruminococcaceae	Gut_cluster_8	0.0244559	0.0489117	0.0366838	0	0	0	0	0	0.0366838	0.0244559	0	0	0	0.0489117	0.0244559	0	0	0	0.0135866
572	Bacteroidetes	Bacteroidia	Bacteroidales	Porphyromonadaceae_3	Porphyromonadaceae_3_unclassified	0	0	0.0366838	0.0244559	0	0	0	0	0	0	0.0489117	0.0489117	0	0.0244559	0.0244559	0.0366838	0	0	0.0135866
590	Planctomycetes	Planctomycetacia	Planctomycetales	Planctomycetaceae	Planctomycetaceae_unclassified	0.0244559	0.0244559	0	0	0	0.0244559	0.0244559	0	0	0	0	0.0244559	0.0244559	0	0.0244559	0	0	0.0733676	0.0135866
549	Firmicutes	Clostridia_1	Clostridiales	Ruminococcaceae	Gut_cluster_7	0	0	0	0	0	0.0244559	0	0	0	0.0244559	0	0.0489117	0	0.0244559	0	0	0.0489117	0.0733676	0.0135866
618	Firmicutes	Clostridia_1	Clostridiales	Clostridiales_unclassified	Clostridiales_unclassified	0	0	0.0733676	0	0	0	0	0	0.0366838	0	0.0489117	0	0.0489117	0	0	0	0	0.0366838	0.0135866
604	Bacteroidetes	Bacteroidia	Bacteroidales	Porphyromonadaceae_3	Porphyromonadaceae_3_unclassified	0	0	0	0	0	0	0	0.0244559	0.0366838	0	0	0.0244559	0	0	0	0	0.0489117	0.110051	0.0135866
630	Firmicutes	Clostridia_1	Clostridiales	Peptostreptococcaceae	Peptostreptococcaceae_unclassified	0	0	0	0	0	0	0	0	0	0.0244559	0	0	0.0244559	0	0.0244559	0.0366838	0.0244559	0.110051	0.0135866
568	Bacteroidetes	Bacteroidia	Bacteroidales	Bacteroidales_unclassified	Bacteroidales_unclassified	0	0.0733676	0	0	0.0489117	0.0244559	0	0	0.0366838	0	0	0.0244559	0	0	0	0	0.0244559	0	0.0129073
576	Firmicutes	Clostridia_1	Clostridiales	Lachnospiraceae	Gut_cluster_13	0	0.0733676	0.0366838	0.0244559	0.0244559	0	0	0	0	0.0489117	0	0	0	0	0.0244559	0	0	0	0.0129073
582	Firmicutes	Clostridia_1	Clostridiales	Ruminococcaceae	Gut_cluster_7	0	0.0489117	0	0	0	0	0.0244559	0.0244559	0.0366838	0	0.0733676	0	0	0.0244559	0	0	0	0	0.0129073
595	Proteobacteria	Gammaproteobacteria_2	Gammaproteobacteria_2_unclassified	Gammaproteobacteria_2_unclassified	Gammaproteobacteria_2_unclassified	0.0489117	0.0244559	0	0.0244559	0	0	0	0.0244559	0.0366838	0	0	0.0489117	0	0.0244559	0	0	0	0	0.0129073
575	Firmicutes	Clostridia_1	Clostridiales	Family_XIII_Incertae_Sedis	Family_XIII_Incertae_Sedis_unclassified	0.0244559	0	0	0	0	0	0	0.0489117	0	0.0244559	0.0244559	0	0.0244559	0.0489117	0	0	0	0.0366838	0.0129073
597	Proteobacteria	Proteobacteria_unclassified	Proteobacteria_unclassified	Proteobacteria_unclassified	Proteobacteria_unclassified	0.0244559	0.0244559	0	0	0.0244559	0.0244559	0	0.0244559	0.0366838	0	0	0.0733676	0	0	0	0	0	0	0.0129073
573	Firmicutes	Clostridia_1	Clostridiales	Clostridiales_unclassified	Clostridiales_unclassified	0	0	0	0.0244559	0	0	0.0244559	0.0244559	0	0.0244559	0.0489117	0.0244559	0	0	0	0.0366838	0.0244559	0	0.0129073
581	Firmicutes	Clostridia_1	Clostridiales	Ruminococcaceae	Gut_cluster_4	0	0	0	0	0	0	0.0244559	0.0244559	0.0366838	0	0.0244559	0.0489117	0.0244559	0.0244559	0	0	0.0244559	0	0.0129073
591	Planctomycetes	Planctomycetacia	Planctomycetales	Planctomycetaceae	Rhodopirellula	0	0.0244559	0	0.0244559	0	0.0244559	0.0489117	0.0244559	0	0	0.0244559	0	0.0244559	0	0	0	0	0.0366838	0.0129073
587	Firmicutes	Clostridia_1	Clostridiales	Ruminococcaceae	Termite_cockroach_cluster	0	0	0.0366838	0.0244559	0.0244559	0.0244559	0.0244559	0	0	0.0244559	0	0	0.0244559	0	0	0	0.0489117	0	0.0129073
588	Firmicutes	Clostridia_1	Clostridiales	Ruminococcaceae	Uncultured_12	0	0	0	0.0489117	0	0	0.0733676	0.0733676	0.0366838	0	0	0	0	0	0	0	0	0	0.0129073
566	Actinobacteria	Actinobacteria	Micromonosporales	Micromonosporaceae	Micromonosporaceae_unclassified	0	0	0.0366838	0	0.0244559	0	0.0244559	0	0	0.0244559	0.0244559	0.0733676	0	0.0244559	0	0	0	0	0.0129073
563	Actinobacteria	Actinobacteria	Actinomycetales	Actinomycetales_unclassified	Actinomycetales_unclassified	0	0	0.0366838	0.0489117	0	0.0244559	0	0	0	0.0489117	0	0	0.0244559	0.0489117	0	0	0	0	0.0129073
574	Firmicutes	Clostridia_1	Clostridiales	Clostridiales_unclassified	Clostridiales_unclassified	0	0	0.0366838	0	0.0244559	0.0244559	0.0244559	0	0	0.0244559	0.0244559	0.0244559	0	0.0244559	0	0	0.0244559	0	0.0129073
593	Proteobacteria	Deltaproteobacteria	Desulfovibrionales	Desulfovibrionaceae	Gut_cluster_2	0.0489117	0	0	0	0	0.0489117	0	0	0	0.0244559	0	0.0244559	0	0	0	0	0.0489117	0.0366838	0.0129073
557	Firmicutes	Firmicutes_unclassified	Firmicutes_unclassified	Firmicutes_unclassified	Firmicutes_unclassified	0.0244559	0	0.0366838	0	0.0244559	0.0489117	0	0	0	0.0489117	0	0	0	0.0244559	0.0244559	0	0	0	0.0129073
657	Proteobacteria	Proteobacteria_unclassified	Proteobacteria_unclassified	Proteobacteria_unclassified	Proteobacteria_unclassified	0	0.0244559	0	0.0733676	0	0	0	0.0244559	0.0733676	0	0	0	0	0	0	0	0	0.0366838	0.0129073
620	Firmicutes	Clostridia_1	Clostridiales	Lachnospiraceae	Gut_cluster_13	0.0244559	0	0.0366838	0.0244559	0	0	0	0	0	0	0	0.0244559	0.0244559	0.0244559	0	0	0	0.0733676	0.0129073
601	Bacteroidetes	Bacteroidia	Bacteroidales	Porphyromonadaceae_3	Cluster_IV	0	0	0	0	0.0244559	0	0	0	0	0	0	0	0.0244559	0	0.0489117	0	0.0244559	0.110051	0.0129073
656	Proteobacteria	Gammaproteobacteria_1	Enterobacteriales	Enterobacteriaceae	Enterobacteriaceae_unclassified	0	0.0244559	0.0366838	0	0	0	0.0244559	0	0.0366838	0	0	0.0244559	0	0	0.0244559	0	0.0244559	0.0366838	0.0129073
614	Firmicutes	Bacilli	Lactobacillales	Leuconostocaceae	Weissella_1	0	0	0	0	0.0244559	0	0	0.0244559	0	0	0	0.0244559	0	0.0489117	0	0.110051	0	0	0.0129073
594	Proteobacteria	Gammaproteobacteria_1	Pseudomonadales	Moraxellaceae	Acinetobacter	0	0.0733676	0	0.0489117	0	0	0.0244559	0.0244559	0	0	0.0244559	0	0.0244559	0	0	0	0	0	0.0122279
567	Bacteroidetes	Bacteroidia	Bacteroidales	Bacteroidales_unclassified	Bacteroidales_unclassified	0.0244559	0.0489117	0	0.0489117	0	0	0	0.0489117	0	0	0	0	0	0.0489117	0	0	0	0	0.0122279
564	Actinobacteria	Actinobacteria	Actinomycetales	Actinomycetales_unclassified	Actinomycetales_unclassified	0	0.0244559	0	0	0	0.0244559	0	0	0	0	0.0733676	0.0489117	0.0244559	0	0.0244559	0	0	0	0.0122279
569	Bacteroidetes	Bacteroidia	Bacteroidales	Porphyromonadaceae_1	Dysgonomonas	0.0244559	0.0244559	0	0.0489117	0	0.0244559	0	0.0489117	0	0	0	0.0244559	0	0	0	0	0.0244559	0	0.0122279
580	Firmicutes	Clostridia_1	Clostridiales	Lachnospiraceae	Lachnospiraceae_unclassified	0	0.0244559	0	0.0733676	0	0.0244559	0	0	0	0	0.0244559	0.0489117	0	0	0.0244559	0	0	0	0.0122279
592	Proteobacteria	Alphaproteobacteria	Rhodospirillales_1	Rhodospirillaceae	Thalassospira	0	0	0	0.0489117	0	0	0	0.0244559	0	0	0.0244559	0	0.0244559	0	0.0978234	0	0	0	0.0122279
585	Firmicutes	Clostridia_1	Clostridiales	Ruminococcaceae	Ruminococcaceae_unclassified	0.0244559	0.0244559	0	0	0.0244559	0.0244559	0	0	0	0	0.0244559	0.0244559	0.0244559	0.0489117	0	0	0	0	0.0122279
589	Firmicutes	Firmicutes_unclassified	Firmicutes_unclassified	Firmicutes_unclassified	Firmicutes_unclassified	0	0.0244559	0	0	0.0489117	0	0.0489117	0.0244559	0	0	0	0.0244559	0	0.0489117	0	0	0	0	0.0122279
578	Firmicutes	Clostridia_1	Clostridiales	Lachnospiraceae	Lachnospiraceae_unclassified	0.0489117	0.0244559	0	0	0.0244559	0.0733676	0.0244559	0	0	0.0244559	0	0	0	0	0	0	0	0	0.0122279
608	Bacteroidetes	Bacteroidia	Bacteroidales	Rikenellaceae	Alisitpes_IV	0	0.0733676	0	0.0244559	0.0244559	0	0	0	0	0	0	0.0244559	0	0	0	0	0	0.0733676	0.0122279
602	Bacteroidetes	Bacteroidia	Bacteroidales	Porphyromonadaceae_3	Cluster_IV	0	0.0489117	0.0366838	0	0.0244559	0	0	0.0489117	0	0	0	0	0	0.0244559	0	0	0	0.0366838	0.0122279
655	Proteobacteria	Gammaproteobacteria	Xanthomonadales	Xanthomonadaceae	Luteimonas_1	0.0244559	0.0244559	0.0733676	0	0.0244559	0	0.0244559	0	0	0	0	0	0.0489117	0	0	0	0	0	0.0122279
611	Firmicutes	Bacilli	Lactobacillales	Lactobacillales_unclassified	Lactobacillales_unclassified	0.0244559	0.0489117	0.0366838	0	0	0	0	0	0	0.0244559	0.0244559	0	0	0	0.0244559	0.0366838	0	0	0.0122279
626	Firmicutes	Clostridia_1	Clostridiales	Lachnospiraceae	Lachnospiraceae_unclassified	0	0.0244559	0.0366838	0.0244559	0.0244559	0	0.0244559	0.0244559	0	0	0	0	0	0	0.0244559	0	0	0.0366838	0.0122279
634	Firmicutes	Clostridia_1	Clostridiales	Ruminococcaceae	Ruminococcaceae_unclassified	0	0.0244559	0.0366838	0	0.0244559	0	0	0.0244559	0.0366838	0	0.0489117	0	0	0.0244559	0	0	0	0	0.0122279
650	Proteobacteria	Deltaproteobacteria	Desulfobacterales	Desulfobacteraceae	Desulfobacteraceae_unclassified	0.0244559	0.0489117	0.0733676	0	0	0	0	0.0244559	0	0	0	0	0	0.0244559	0	0	0.0244559	0	0.0122279
612	Firmicutes	Bacilli	Lactobacillales	Lactobacillales_unclassified	Lactobacillales_unclassified	0.0244559	0	0	0	0	0	0	0.0244559	0	0	0	0	0.0244559	0.0244559	0.0244559	0.0733676	0.0244559	0	0.0122279
617	Firmicutes	Clostridia_1	Clostridiales	Clostridiales_unclassified	Clostridiales_unclassified	0	0	0	0.0733676	0	0.0244559	0	0	0	0	0	0	0.0489117	0	0	0.0366838	0	0.0366838	0.0122279
633	Firmicutes	Clostridia_1	Clostridiales	Ruminococcaceae	Papillibacter	0.0244559	0.0244559	0.0733676	0.0489117	0.0244559	0	0	0	0	0	0	0	0	0.0244559	0	0	0	0	0.0122279
640	Firmicutes	Clostridia_1	Clostridiales	Ruminococcaceae	Termite_cockroach_cluster	0	0.0244559	0	0	0	0.0244559	0	0	0	0	0	0	0.0244559	0	0.0489117	0	0.0244559	0.0733676	0.0122279
603	Bacteroidetes	Bacteroidia	Bacteroidales	Porphyromonadaceae_3	Cluster_IV	0	0	0	0	0.0244559	0	0.0244559	0	0	0	0	0.0244559	0	0	0.0244559	0.0366838	0.0489117	0.0366838	0.0122279
616	Firmicutes	Clostridia_1	Clostridiales	Clostridiales_unclassified	Clostridiales_unclassified	0	0	0	0.0244559	0	0	0	0	0	0	0	0.0244559	0	0	0.0489117	0.0733676	0.0489117	0	0.0122279
615	Firmicutes	Clostridia_1	Clostridiales	Clostridiales_unclassified	Clostridiales_unclassified	0	0.0244559	0.0733676	0.0244559	0	0.0244559	0	0	0	0	0	0	0	0.0244559	0.0244559	0	0.0244559	0	0.0122279
613	Firmicutes	Bacilli	Lactobacillales	Leuconostocaceae	Weissella_1	0	0	0	0.0244559	0	0.0244559	0	0.0244559	0.0366838	0	0	0	0	0.0244559	0	0.0366838	0.0489117	0	0.0122279
646	Proteobacteria	Alphaproteobacteria	Rhodospirillales_1	Rhodospirillaceae	Uncultured_2	0.0244559	0.0244559	0.0733676	0	0	0	0.0244559	0	0	0.0489117	0	0	0	0.0244559	0	0	0	0	0.0122279
599	Bacteroidetes	Bacteroidia	Bacteroidales	Bacteroidales_unclassified	Bacteroidales_unclassified	0.0244559	0	0	0	0.0244559	0.0244559	0	0.0244559	0	0.0489117	0	0	0	0	0	0.0733676	0	0	0.0122279
658	Synergistetes	Synergistia	Synergistales	Synergistaceae	Synergistaceae_unclassified	0	0	0.0366838	0	0	0	0.0244559	0.0244559	0.0366838	0.0244559	0	0	0	0.0489117	0	0	0.0244559	0	0.0122279
666	Bacteroidetes	Bacteroidia	Bacteroidales	Porphyromonadaceae_3	Cluster_IV	0	0	0	0	0	0	0	0	0.0733676	0	0	0.0244559	0.0244559	0.0244559	0	0.0733676	0	0	0.0122279
700	Proteobacteria	Deltaproteobacteria	Desulfovibrionales	Desulfovibrionaceae	Gut_cluster_2	0	0	0	0.0489117	0	0	0	0	0	0	0	0.0244559	0	0	0	0.0733676	0	0.0733676	0.0122279
642	Firmicutes	Erysipelotrichi	Erysipelotrichales	Erysipelotrichaceae	Uncultured_3	0	0.0489117	0	0.0489117	0	0	0	0	0.0366838	0	0	0	0.0244559	0.0244559	0.0244559	0	0	0	0.0115486
628	Firmicutes	Clostridia_1	Clostridiales	Lachnospiraceae	Lachnospiraceae_unclassified	0.0489117	0.0489117	0.0366838	0	0	0.0244559	0	0	0	0	0	0.0244559	0	0	0.0244559	0	0	0	0.0115486
636	Firmicutes	Clostridia_1	Clostridiales	Ruminococcaceae	Ruminococcaceae_unclassified	0.0733676	0	0.0366838	0	0.0244559	0	0	0	0	0	0.0244559	0.0244559	0	0	0	0	0.0244559	0	0.0115486
639	Firmicutes	Clostridia_1	Clostridiales	Ruminococcaceae	Ruminococcaceae_unclassified	0	0	0	0.0489117	0.0244559	0	0.0244559	0.0244559	0.0366838	0	0.0244559	0	0.0244559	0	0	0	0	0	0.0115486
648	Proteobacteria	Deltaproteobacteria	Bdellovibrionales	Bacteriovoraceae	Bacteriovoraceae_unclassified	0	0	0	0.0244559	0	0	0	0	0	0.0244559	0.0489117	0.0244559	0	0	0	0	0.0489117	0.0366838	0.0115486
652	Proteobacteria	Deltaproteobacteria	Desulfovibrionales	Desulfovibrionaceae	Gut_cluster_3	0	0	0	0.0489117	0.0244559	0	0	0.0244559	0.0366838	0	0.0244559	0.0244559	0	0.0244559	0	0	0	0	0.0115486
577	Firmicutes	Clostridia_1	Clostridiales	Lachnospiraceae	Lachnospiraceae_unclassified	0	0.0244559	0	0.0244559	0	0	0	0	0.0366838	0.0244559	0.0244559	0.0489117	0	0.0244559	0	0	0	0	0.0115486
622	Firmicutes	Clostridia_1	Clostridiales	Lachnospiraceae	Gut_cluster_13	0.0244559	0	0.0366838	0.0244559	0.0244559	0	0.0244559	0.0244559	0	0	0.0244559	0	0	0	0	0	0.0244559	0	0.0115486
631	Firmicutes	Clostridia_1	Clostridiales	Ruminococcaceae	Gut_cluster_7	0	0	0	0.0244559	0	0	0.0244559	0.0244559	0	0	0.0244559	0	0.0244559	0.0489117	0	0	0	0.0366838	0.0115486
645	Proteobacteria	Alphaproteobacteria	Rhizobiales_2	Bradyrhizobiaceae	Bosea	0.0244559	0.0244559	0.0366838	0	0	0	0.0489117	0.0244559	0	0	0.0244559	0.0244559	0	0	0	0	0	0	0.0115486
654	Proteobacteria	Deltaproteobacteria	Desulfovibrionales	Desulfovibrionaceae	Gut_cluster_3	0.0489117	0	0	0	0	0	0.0244559	0.0489117	0	0	0	0.0244559	0	0	0	0	0.0244559	0.0366838	0.0115486
659	Verrucomicrobia	Opitutae	Opitutae_unclassified	Opitutae_unclassified	Opitutae_unclassified	0	0.0244559	0	0	0	0	0	0	0.0366838	0.0489117	0	0.0244559	0.0244559	0.0244559	0	0	0.0244559	0	0.0115486
598	Bacteroidetes	Bacteroidetes_unclassified	Bacteroidetes_unclassified	Bacteroidetes_unclassified	Bacteroidetes_unclassified	0.0244559	0	0	0	0	0	0	0.0244559	0.0366838	0	0.0733676	0	0	0.0489117	0	0	0	0	0.0115486
607	Bacteroidetes	Bacteroidia	Bacteroidales	Porphyromonadaceae_3	Porphyromonadaceae_3_unclassified	0	0	0	0	0	0	0.0489117	0.0244559	0	0	0	0.0489117	0.0244559	0	0.0244559	0.0366838	0	0	0.0115486
619	Firmicutes	Clostridia_1	Clostridiales	Family_XIII_Incertae_Sedis	Family_XIII_Incertae_Sedis_unclassified	0.0244559	0	0	0.0244559	0.0244559	0.0244559	0.0244559	0.0244559	0.0366838	0	0	0	0	0	0	0	0.0244559	0	0.0115486
621	Firmicutes	Clostridia_1	Clostridiales	Lachnospiraceae	Gut_cluster_13	0.0489117	0	0	0	0	0.0244559	0	0	0	0	0.0489117	0.0244559	0	0.0244559	0	0.0366838	0	0	0.0115486
623	Firmicutes	Clostridia_1	Clostridiales	Lachnospiraceae	Gut_cluster_13	0.0244559	0	0	0	0.0489117	0.0489117	0	0	0	0	0.0244559	0.0244559	0	0	0	0	0	0.0366838	0.0115486
637	Firmicutes	Clostridia_1	Clostridiales	Ruminococcaceae	Ruminococcaceae_unclassified	0	0	0	0.0244559	0.0244559	0	0	0	0.0366838	0.0244559	0	0	0	0.0489117	0.0489117	0	0	0	0.0115486
651	Proteobacteria	Deltaproteobacteria	Desulfovibrionales	Desulfovibrionaceae	Gut_cluster_3	0	0	0	0	0	0.0244559	0.0244559	0	0	0.0489117	0.0244559	0	0.0244559	0	0	0.0366838	0.0244559	0	0.0115486
649	Proteobacteria	Deltaproteobacteria	Desulfarculales	Desulfarculaceae	Desulfarculus	0	0	0	0	0	0.0489117	0	0.0244559	0	0	0.0244559	0.0489117	0	0	0.0244559	0	0	0.0366838	0.0115486
672	Firmicutes	Bacilli	Bacillales	Paenibacillaceae_2	Paenibacillus_17	0.0244559	0	0.110051	0.0244559	0	0.0244559	0	0.0244559	0	0	0	0	0	0	0	0	0	0	0.0115486
632	Firmicutes	Clostridia_1	Clostridiales	Ruminococcaceae	Insect_cluster	0	0.0978234	0	0.0489117	0.0244559	0.0244559	0	0	0	0	0	0	0	0	0	0	0	0	0.0108693
624	Firmicutes	Clostridia_1	Clostridiales	Lachnospiraceae	Gut_cluster_14	0	0.0244559	0	0.0244559	0	0	0.0244559	0.0489117	0	0	0	0	0.0733676	0	0	0	0	0	0.0108693
600	Bacteroidetes	Bacteroidia	Bacteroidales	Porphyromonadaceae_2	Porphyromonadaceae_2_unclassified	0.0244559	0	0	0	0	0	0	0.0244559	0	0.0244559	0	0	0.0244559	0	0	0	0.0978234	0	0.0108693
610	Firmicutes	Bacilli	Lactobacillales	Lactobacillales_unclassified	Lactobacillales_unclassified	0	0.0489117	0	0.0244559	0	0	0	0	0	0.0244559	0	0.0489117	0	0.0244559	0	0	0.0244559	0	0.0108693
627	Firmicutes	Clostridia_1	Clostridiales	Lachnospiraceae	Lachnospiraceae_unclassified	0	0.0244559	0	0.0489117	0.0244559	0	0.0244559	0.0244559	0	0	0	0.0489117	0	0	0	0	0	0	0.0108693
641	Firmicutes	Clostridia_2	Clostridiales_1	Peptococcaceae_1	Uncultured_2	0.0978234	0	0	0.0244559	0.0489117	0	0	0	0	0	0	0	0	0	0	0	0.0244559	0	0.0108693
609	Firmicutes	Bacilli	Lactobacillales	Lactobacillales_unclassified	Lactobacillales_unclassified	0.0244559	0	0	0	0	0	0.0489117	0.0244559	0	0	0.0244559	0.0244559	0.0244559	0	0	0	0.0244559	0	0.0108693
643	Planctomycetes	Planctomycetacia	Planctomycetales	Planctomycetaceae	Pir4_lineage	0.0244559	0.0244559	0	0.0489117	0	0	0	0	0	0	0.0244559	0	0	0.0244559	0.0489117	0	0	0	0.0108693
647	Proteobacteria	Alphaproteobacteria	Sphingomonadales	Sphingomonadales_unclassified	Sphingomonadales_unclassified	0.0733676	0.0489117	0	0	0.0244559	0.0489117	0	0	0	0	0	0	0	0	0	0	0	0	0.0108693
629	Firmicutes	Clostridia_1	Clostridiales	Lachnospiraceae	Uncultured_62	0.0733676	0	0	0.0244559	0.0244559	0	0	0	0	0	0.0244559	0	0	0.0244559	0.0244559	0	0	0	0.0108693
606	Bacteroidetes	Bacteroidia	Bacteroidales	Porphyromonadaceae_3	Porphyromonadaceae_3_unclassified	0.122279	0	0	0.0244559	0.0244559	0.0244559	0	0	0	0	0	0	0	0	0	0	0	0	0.0108693
635	Firmicutes	Clostridia_1	Clostridiales	Ruminococcaceae	Ruminococcaceae_unclassified	0	0	0	0	0	0.0244559	0.0489117	0.0244559	0	0	0.0244559	0	0.0489117	0.0244559	0	0	0	0	0.0108693
653	Proteobacteria	Deltaproteobacteria	Desulfovibrionales	Desulfovibrionaceae	Gut_cluster_3	0	0	0	0.0489117	0	0.0244559	0.0244559	0	0	0	0.0733676	0	0	0	0.0244559	0	0	0	0.0108693
625	Firmicutes	Clostridia_1	Clostridiales	Lachnospiraceae	Lachnospiraceae_unclassified	0	0	0	0	0.0244559	0	0.0244559	0.0244559	0	0.0244559	0	0.0733676	0	0.0244559	0	0	0	0	0.0108693
605	Bacteroidetes	Bacteroidia	Bacteroidales	Porphyromonadaceae_3	Porphyromonadaceae_3_unclassified	0	0	0	0.0244559	0	0	0	0	0	0	0	0.0244559	0	0.122279	0	0	0.0244559	0	0.0108693
638	Firmicutes	Clostridia_1	Clostridiales	Ruminococcaceae	Ruminococcaceae_unclassified	0.0244559	0	0	0	0	0	0.0244559	0	0	0.0244559	0	0.0489117	0	0.0489117	0	0	0.0244559	0	0.0108693
660	Verrucomicrobia	Spartobacteria	Chthoniobacterales	Xiphinematobacteraceae	Candidatus_Xiphinematobacter	0	0	0	0	0	0	0.0733676	0	0	0.0244559	0	0	0.0244559	0.0733676	0	0	0	0	0.0108693
698	Proteobacteria	Betaproteobacteria	Betaproteobacteria_unclassified	Betaproteobacteria_unclassified	Betaproteobacteria_unclassified	0	0	0	0	0	0	0	0	0	0	0	0	0.122279	0	0	0	0	0.0733676	0.0108693
693	Planctomycetes	Planctomycetacia	Planctomycetales	Planctomycetaceae	Termite_cockroach_cluster_2	0.0244559	0	0.0733676	0.0244559	0.0244559	0	0	0	0	0	0	0	0.0244559	0	0.0244559	0	0	0	0.0108693
697	Proteobacteria	Alphaproteobacteria	Rickettsiales	Candidatus_Captivus	Candidatus_Captivus	0	0	0	0	0	0	0	0	0	0	0.0733676	0	0	0	0	0	0.0489117	0.0733676	0.0108693
675	Firmicutes	Clostridia_1	Clostridiales	Lachnospiraceae	Gut_cluster_13	0.0733676	0	0.0366838	0	0	0	0	0	0	0	0.0244559	0.0244559	0	0	0	0	0	0.0366838	0.0108693
707	Synergistetes	Synergistia	Synergistales	Synergistaceae	Candidatus_Tammella	0.0244559	0	0	0.0244559	0.0489117	0	0	0.0244559	0	0	0	0	0	0	0	0.0366838	0	0.0366838	0.0108693
669	Bacteroidetes	Bacteroidia	Bacteroidales	Rikenellaceae	Alisitpes_IV	0	0	0.0733676	0.0244559	0	0	0.0244559	0	0	0.0489117	0	0	0	0	0.0244559	0	0	0	0.0108693
696	Proteobacteria	Alphaproteobacteria	Rhodospirillales_2	wr0007	wr0007_unclassified	0	0	0.0366838	0	0	0	0	0.0244559	0.0733676	0	0	0	0	0	0.0244559	0	0	0.0366838	0.0108693
724	Bacteroidetes	Bacteroidia	Bacteroidales	Rikenellaceae	Alisitpes_IV	0	0	0	0	0	0	0.0244559	0	0	0	0	0	0	0	0	0.0733676	0.0244559	0.0733676	0.0108693
679	Firmicutes	Clostridia_1	Clostridiales	Ruminococcaceae	Ruminococcaceae_unclassified	0	0.0489117	0	0	0.0244559	0	0	0.0244559	0	0	0.0489117	0	0	0	0	0	0	0.0366838	0.0101899
686	Firmicutes	Firmicutes_unclassified	Firmicutes_unclassified	Firmicutes_unclassified	Firmicutes_unclassified	0	0.0244559	0	0	0.0244559	0	0	0	0	0	0.0244559	0.0244559	0.0244559	0	0	0	0.0244559	0.0366838	0.0101899
667	Bacteroidetes	Bacteroidia	Bacteroidales	Porphyromonadaceae_3	Porphyromonadaceae_3_unclassified	0.0244559	0	0	0	0	0	0	0.0244559	0	0	0.0489117	0	0.0244559	0	0	0	0.0244559	0.0366838	0.0101899
682	Firmicutes	Clostridia_1	Clostridiales	Ruminococcaceae	Termite_cockroach_cluster	0	0.0733676	0	0	0.0244559	0.0244559	0.0244559	0	0.0366838	0	0	0	0	0	0	0	0	0	0.0101899
685	Firmicutes	Clostridia_2	Clostridiales_1	Veillonellaceae	Veillonellaceae_unclassified	0	0.0244559	0	0	0.0244559	0	0	0.0489117	0.0366838	0	0	0	0	0	0.0244559	0	0.0244559	0	0.0101899
662	Actinobacteria	Actinobacteria	Micrococcales_3	Microbacteriaceae	Microbacteriaceae_unclassified	0.0244559	0.0244559	0.0366838	0.0489117	0	0	0	0	0	0.0244559	0	0	0.0244559	0	0	0	0	0	0.0101899
702	Proteobacteria	Deltaproteobacteria	Desulfovibrionales	Desulfovibrionaceae	Gut_cluster_3	0.0244559	0.0489117	0	0	0	0	0	0.0244559	0.0366838	0.0489117	0	0	0	0	0	0	0	0	0.0101899
689	Firmicutes	Firmicutes_unclassified	Firmicutes_unclassified	Firmicutes_unclassified	Firmicutes_unclassified	0	0	0.0366838	0	0.0244559	0	0	0	0	0	0.0489117	0	0.0244559	0.0244559	0.0244559	0	0	0	0.0101899
681	Firmicutes	Clostridia_1	Clostridiales	Ruminococcaceae	Ruminococcaceae_unclassified	0	0	0	0	0.0244559	0	0	0	0.0366838	0.0244559	0.0244559	0.0244559	0	0	0.0244559	0	0.0244559	0	0.0101899
683	Firmicutes	Clostridia_1	Clostridiales	Ruminococcaceae	Termite_cockroach_cluster	0	0	0	0.0244559	0.0244559	0	0.0244559	0.0244559	0	0	0	0	0	0	0.0244559	0	0.0244559	0.0366838	0.0101899
706	Proteobacteria	Proteobacteria_unclassified	Proteobacteria_unclassified	Proteobacteria_unclassified	Proteobacteria_unclassified	0.0489117	0	0.0366838	0	0.0489117	0	0.0244559	0.0244559	0	0	0	0	0	0	0	0	0	0	0.0101899
708	unknown	unknown_unclassified	unknown_unclassified	unknown_unclassified	unknown_unclassified	0	0	0	0	0	0	0.0244559	0.0244559	0	0	0	0.0244559	0	0	0.0244559	0.0366838	0.0489117	0	0.0101899
664	Bacteroidetes	Bacteroidia	Bacteroidales	Bacteroidales_unclassified	Bacteroidales_unclassified	0.0244559	0	0.0366838	0	0.0244559	0	0.0244559	0	0	0.0244559	0	0	0.0244559	0	0.0244559	0	0	0	0.0101899
644	Proteobacteria	Alphaproteobacteria	Caulobacterales	Caulobacteraceae	Phenylobacterium	0	0	0.0366838	0.0244559	0.0244559	0.0244559	0.0244559	0.0244559	0	0	0	0	0	0	0	0	0.0244559	0	0.0101899
665	Bacteroidetes	Bacteroidia	Bacteroidales	Bacteroidales_unclassified	Bacteroidales_unclassified	0	0	0	0.0244559	0	0	0	0	0	0	0	0.0244559	0	0.0733676	0	0	0.0244559	0.0366838	0.0101899
674	Firmicutes	Clostridia_1	Clostridiales	Lachnospiraceae	Catabacter	0.0244559	0	0.0366838	0	0.0244559	0	0	0	0	0.0489117	0.0244559	0	0	0	0.0244559	0	0	0	0.0101899
703	Proteobacteria	Deltaproteobacteria	Desulfovibrionales	Desulfovibrionaceae	Gut_cluster_3	0	0	0	0.0244559	0	0.0244559	0	0	0.0366838	0	0	0	0	0	0.0489117	0	0.0489117	0	0.0101899
673	Firmicutes	Clostridia_1	Clostridiales	Clostridiaceae_1	Clostridiaceae_1_unclassified	0.0244559	0	0.0366838	0	0	0.0244559	0	0	0	0	0.0244559	0.0489117	0	0	0.0244559	0	0	0	0.0101899
705	Proteobacteria	Gammaproteobacteria	Xanthomonadales	Xanthomonadaceae	Stenotrophomonas	0	0	0	0	0.0244559	0.0489117	0	0	0.0366838	0	0.0244559	0.0489117	0	0	0	0	0	0	0.0101899
694	Planctomycetes	vadinHA49	Insect_cluster	Insect_cluster_unclassified	Insect_cluster_unclassified	0	0	0	0	0	0.0489117	0	0	0	0.0489117	0	0.0244559	0	0.0244559	0	0.0366838	0	0	0.0101899
728	Deferribacteres	Deferribacteres	Deferribacterales	Deferribacteraceae	Mucispirillum	0	0	0.0366838	0	0	0	0.0489117	0	0.0733676	0	0	0	0.0244559	0	0	0	0	0	0.0101899
746	Firmicutes	Clostridia_1	Clostridiales	Lachnospiraceae	Lachnospiraceae_unclassified	0	0	0.0366838	0	0	0	0	0	0.0366838	0	0.0244559	0	0	0.0244559	0.0244559	0.0366838	0	0	0.0101899
677	Firmicutes	Clostridia_1	Clostridiales	Lachnospiraceae	Lachnospiraceae_unclassified	0.0733676	0.0489117	0	0	0	0	0	0.0244559	0	0	0.0244559	0	0	0	0	0	0	0	0.00951061
680	Firmicutes	Clostridia_1	Clostridiales	Ruminococcaceae	Ruminococcaceae_unclassified	0	0.0244559	0	0.0489117	0	0	0	0	0	0.0244559	0	0	0.0489117	0	0	0	0.0244559	0	0.00951061
691	Planctomycetes	Planctomycetacia	Planctomycetales	Planctomycetaceae	Planctomyces_1	0	0.0489117	0	0	0	0	0	0.0244559	0	0.0489117	0.0244559	0	0.0244559	0	0	0	0	0	0.00951061
671	Chloroflexi	KD4-96	KD4-96_unclassified	KD4-96_unclassified	KD4-96_unclassified	0	0.0244559	0	0	0	0	0	0.0489117	0	0	0	0	0.0244559	0.0244559	0.0244559	0	0.0244559	0	0.00951061
676	Firmicutes	Clostridia_1	Clostridiales	Lachnospiraceae	Gut_cluster_13	0.0244559	0	0	0.0244559	0	0	0	0	0	0	0.0244559	0	0.0489117	0.0244559	0	0	0.0244559	0	0.00951061
663	Actinobacteria	Actinobacteria	Micromonosporales	Micromonosporaceae	Micromonosporaceae_unclassified	0	0.0244559	0	0	0	0.0244559	0	0.0489117	0	0.0244559	0.0244559	0	0.0244559	0	0	0	0	0	0.00951061
668	Bacteroidetes	Bacteroidia	Bacteroidales	Porphyromonadaceae_Cluster_V	Cockroach_cluster	0	0	0	0	0	0	0.0244559	0.0733676	0	0	0	0	0	0	0.0244559	0	0.0489117	0	0.00951061
688	Firmicutes	Firmicutes_unclassified	Firmicutes_unclassified	Firmicutes_unclassified	Firmicutes_unclassified	0.0244559	0.0244559	0	0.0244559	0	0	0	0	0	0	0	0.0244559	0	0.0244559	0.0489117	0	0	0	0.00951061
699	Proteobacteria	Deltaproteobacteria	Desulfarculales	Desulfarculaceae	Uncultured	0.0244559	0	0	0.0244559	0	0	0.0244559	0	0	0.0244559	0.0489117	0	0.0244559	0	0	0	0	0	0.00951061
701	Proteobacteria	Deltaproteobacteria	Desulfovibrionales	Desulfovibrionaceae	Gut_cluster_3	0.0244559	0	0	0	0	0	0.0489117	0.0244559	0	0	0.0244559	0.0244559	0.0244559	0	0	0	0	0	0.00951061
661	Actinobacteria	Actinobacteria	Actinomycetales	Actinomycetaceae_2	Actinomyces_2	0	0	0	0	0	0	0	0.0244559	0	0.0489117	0	0.0244559	0.0244559	0	0.0489117	0	0	0	0.00951061
670	Bacteroidetes	Bacteroidia	Bacteroidales	Rikenellaceae	Alisitpes_IV	0	0	0	0	0	0.0244559	0	0	0	0	0.0244559	0	0.0489117	0.0244559	0.0489117	0	0	0	0.00951061
687	Firmicutes	Firmicutes_unclassified	Firmicutes_unclassified	Firmicutes_unclassified	Firmicutes_unclassified	0.0244559	0	0	0.0489117	0.0244559	0	0.0244559	0	0	0.0244559	0	0.0244559	0	0	0	0	0	0	0.00951061
690	Firmicutes	Firmicutes_unclassified	Firmicutes_unclassified	Firmicutes_unclassified	Firmicutes_unclassified	0	0	0	0.0489117	0	0	0.0244559	0.0244559	0	0.0489117	0	0	0	0	0	0	0.0244559	0	0.00951061
692	Planctomycetes	Planctomycetacia	Planctomycetales	Planctomycetaceae	Planctomyces_1	0.0244559	0	0	0	0	0	0	0	0	0	0.0244559	0	0.0244559	0.0244559	0.0733676	0	0	0	0.00951061
704	Proteobacteria	Deltaproteobacteria	Desulfovibrionales	Desulfovibrionales_unclassified	Desulfovibrionales_unclassified	0.0489117	0	0	0.0244559	0	0.0489117	0	0	0	0.0244559	0	0	0.0244559	0	0	0	0	0	0.00951061
684	Firmicutes	Clostridia_1	Clostridiales	Ruminococcaceae	Termite_cockroach_cluster	0.0244559	0	0	0	0.0244559	0.0489117	0.0244559	0	0	0	0	0	0.0244559	0	0.0244559	0	0	0	0.00951061
678	Firmicutes	Clostridia_1	Clostridiales	Ruminococcaceae	Ruminococcaceae_unclassified	0.0489117	0	0	0	0	0.0489117	0.0244559	0	0	0.0244559	0	0	0.0244559	0	0	0	0	0	0.00951061
713	Bacteroidetes	Bacteroidetes_unclassified	Bacteroidetes_unclassified	Bacteroidetes_unclassified	Bacteroidetes_unclassified	0	0.0489117	0.0366838	0	0	0	0	0.0489117	0	0	0	0	0	0	0	0.0366838	0	0	0.00951061
777	Proteobacteria	Deltaproteobacteria	Desulfovibrionales	Desulfovibrionaceae	Gut_cluster_3	0	0.0489117	0.0366838	0	0	0	0	0	0	0	0.0244559	0	0	0	0.0244559	0	0	0.0366838	0.00951061
712	Actinobacteria	Actinobacteria	Solirubrobacterales	Cluster_480-2	Cluster_480-2_unclassified	0	0	0	0	0	0	0	0.0244559	0	0	0	0	0.0244559	0	0	0	0.0489117	0.0733676	0.00951061
741	Firmicutes	Clostridia_1	Clostridiales	Lachnospiraceae	Gut_cluster_13	0.0244559	0.0244559	0	0	0	0	0	0	0	0	0	0.0244559	0	0	0	0	0.0244559	0.0733676	0.00951061
749	Firmicutes	Clostridia_1	Clostridiales	Ruminococcaceae	Gut_cluster_4	0.0733676	0.0244559	0.0366838	0	0	0	0	0	0.0366838	0	0	0	0	0	0	0	0	0	0.00951061
747	Firmicutes	Clostridia_1	Clostridiales	Lachnospiraceae	Lachnospiraceae_unclassified	0	0	0	0	0.0489117	0	0	0.0244559	0.0366838	0	0	0	0	0.0244559	0	0.0366838	0	0	0.00951061
751	Firmicutes	Clostridia_1	Clostridiales	Ruminococcaceae	Insect_cluster	0	0	0	0	0	0	0.0244559	0	0.0733676	0	0	0.0489117	0.0244559	0	0	0	0	0	0.00951061
754	Firmicutes	Clostridia_1	Clostridiales	Ruminococcaceae	Ruminococcaceae_unclassified	0	0	0	0.0244559	0	0	0	0	0.0366838	0	0.0244559	0	0	0	0	0.0366838	0.0489117	0	0.00951061
732	Firmicutes	Clostridia_1	Clostridiales	Clostridiales_unclassified	Clostridiales_unclassified	0	0	0	0.0244559	0.0244559	0.0244559	0	0	0.0366838	0	0	0	0.0244559	0	0	0	0	0.0366838	0.00951061
774	Proteobacteria	Deltaproteobacteria	Desulfovibrionales	Desulfovibrionaceae	Gut_cluster_3	0	0.0244559	0.0366838	0	0	0	0	0	0.0366838	0.0733676	0	0	0	0	0	0	0	0	0.00951061
717	Bacteroidetes	Bacteroidia	Bacteroidales	Porphyromonadaceae_1	Dysgonomonas	0	0	0	0	0	0	0	0	0	0	0	0.0489117	0	0	0.0489117	0	0	0.0733676	0.00951061
710	Actinobacteria	Actinobacteria	Actinomycetales	Actinomycetaceae_2	Actinomycetaceae_2_unclassified	0	0	0.0366838	0	0	0.0244559	0	0.0489117	0	0.0244559	0	0	0	0	0	0.0366838	0	0	0.00951061
726	Bacteroidetes	Bacteroidia	Bacteroidales	Rikenellaceae	Alisitpes_IV	0.0244559	0	0.0733676	0	0	0	0.0244559	0	0	0.0244559	0.0244559	0	0	0	0	0	0	0	0.00951061
757	Firmicutes	Clostridia_1	Clostridiales	Ruminococcaceae	Termite_cockroach_cluster	0	0.0244559	0	0	0	0.0244559	0.0244559	0	0.0733676	0.0244559	0	0	0	0	0	0	0	0	0.00951061
771	Proteobacteria	Betaproteobacteria	Burkholderiales	Comamonadaceae	Polaromonas	0	0	0	0	0	0	0.0244559	0	0	0.0244559	0	0	0	0.0489117	0	0	0	0.0733676	0.00951061
739	Firmicutes	Clostridia_1	Clostridiales	Lachnospiraceae	Gut_cluster_13	0	0.0733676	0	0	0	0	0	0	0	0	0.0244559	0	0.0244559	0	0	0	0	0.0366838	0.00883128
729	Firmicutes	Bacilli	Lactobacillales	Lactobacillaceae	Lactobacillaceae_unclassified	0	0.0244559	0	0	0	0	0	0	0	0	0	0	0.0978234	0	0	0	0	0.0366838	0.00883128
730	Firmicutes	Bacilli	Lactobacillales	Lactobacillaceae	Lactobacillaceae_unclassified	0	0	0	0	0	0	0	0	0	0	0	0	0.0733676	0	0	0.0366838	0.0489117	0	0.00883128
737	Firmicutes	Clostridia_1	Clostridiales	Lachnospiraceae	Candidatus_Arthromitus	0	0.0244559	0	0	0	0	0.0244559	0	0.0366838	0	0	0	0.0489117	0.0244559	0	0	0	0	0.00883128
758	Firmicutes	Clostridia_1	Clostridiales	Ruminococcaceae	Uncultured_24	0	0.0244559	0	0	0	0	0	0	0.0366838	0	0.0489117	0.0489117	0	0	0	0	0	0	0.00883128
773	Proteobacteria	Deltaproteobacteria	Desulfovibrionales	Desulfovibrionaceae	Gut_cluster_3	0	0.0489117	0	0	0	0	0.0244559	0	0	0	0	0.0489117	0	0	0	0	0	0.0366838	0.00883128
733	Firmicutes	Clostridia_1	Clostridiales	Clostridiales_unclassified	Clostridiales_unclassified	0	0.0489117	0	0	0	0.0244559	0	0.0244559	0	0.0244559	0	0	0	0	0	0.0366838	0	0	0.00883128
738	Firmicutes	Clostridia_1	Clostridiales	Lachnospiraceae	Gut_cluster_13	0	0	0	0	0.0244559	0	0	0.0244559	0	0	0.0489117	0.0244559	0	0	0	0	0	0.0366838	0.00883128
760	Firmicutes	Clostridia_2	Clostridiales_1	Peptococcaceae_1	Uncultured_2	0	0.0244559	0.0366838	0.0244559	0	0	0.0244559	0.0244559	0	0	0	0	0	0	0	0	0.0244559	0	0.00883128
779	Proteobacteria	Deltaproteobacteria	Desulfovibrionales	Desulfovibrionaceae	Gut_cluster_3	0.0244559	0	0	0	0	0	0	0.0489117	0.0366838	0	0	0	0.0244559	0	0.0244559	0	0	0	0.00883128
782	Verrucomicrobia	Spartobacteria	Chthoniobacterales	Xiphinematobacteraceae	Candidatus_Xiphinematobacter	0	0	0	0	0	0	0	0	0	0.0244559	0.0489117	0	0.0244559	0	0	0	0.0244559	0.0366838	0.00883128
775	Proteobacteria	Deltaproteobacteria	Desulfovibrionales	Desulfovibrionaceae	Gut_cluster_3	0.0489117	0	0	0	0	0	0	0	0.0366838	0	0.0244559	0	0.0244559	0.0244559	0	0	0	0	0.00883128
720	Bacteroidetes	Bacteroidia	Bacteroidales	Porphyromonadaceae_3	Cluster_IV	0	0	0.0366838	0.0244559	0	0	0	0.0244559	0	0	0	0	0	0.0244559	0.0489117	0	0	0	0.00883128
735	Firmicutes	Clostridia_1	Clostridiales	Clostridiales_unclassified	Clostridiales_unclassified	0.0244559	0	0	0	0	0	0.0244559	0	0.0366838	0	0	0	0	0.0244559	0	0	0.0489117	0	0.00883128
743	Firmicutes	Clostridia_1	Clostridiales	Lachnospiraceae	Lachnospiraceae_unclassified	0.0244559	0	0	0	0	0	0	0.0244559	0.0366838	0.0244559	0	0	0	0	0.0244559	0	0.0244559	0	0.00883128
768	Planctomycetes	vadinHA49	Insect_cluster	Insect_cluster_unclassified	Insect_cluster_unclassified	0	0	0	0.0244559	0	0	0	0	0.0366838	0.0244559	0	0	0.0244559	0.0244559	0.0244559	0	0	0	0.00883128
716	Bacteroidetes	Bacteroidia	Bacteroidales	Bacteroidales_unclassified	Bacteroidales_unclassified	0	0	0	0	0.0244559	0.0244559	0	0.0244559	0	0.0244559	0	0	0	0	0	0.0366838	0.0244559	0	0.00883128
723	Bacteroidetes	Bacteroidia	Bacteroidales	Porphyromonadaceae_3	Porphyromonadaceae_3_unclassified	0	0	0	0.0244559	0	0.0244559	0	0	0.0366838	0.0244559	0.0244559	0.0244559	0	0	0	0	0	0	0.00883128
727	Deferribacteres	Deferribacteres	Deferribacterales	Deferribacteraceae	Mucispirillum	0	0	0.0366838	0.0489117	0	0.0244559	0	0	0	0	0	0.0244559	0	0.0244559	0	0	0	0	0.00883128
778	Proteobacteria	Deltaproteobacteria	Desulfovibrionales	Desulfovibrionaceae	Gut_cluster_3	0	0	0	0	0.0244559	0	0	0.0244559	0	0.0733676	0	0	0	0	0	0	0	0.0366838	0.00883128
781	Tenericutes	Mollicutes	RF9	RF9_unclassified	RF9_unclassified	0.0489117	0	0	0	0	0	0	0	0.0366838	0.0244559	0	0	0	0.0489117	0	0	0	0	0.00883128
750	Firmicutes	Clostridia_1	Clostridiales	Ruminococcaceae	Insect_cluster	0	0	0	0.0244559	0	0.0489117	0.0244559	0	0	0	0	0	0.0244559	0	0	0.0366838	0	0	0.00883128
769	Proteobacteria	Alphaproteobacteria	Alphaproteobacteria_unclassified	Alphaproteobacteria_unclassified	Alphaproteobacteria_unclassified	0	0	0	0	0	0.0244559	0	0.0244559	0	0	0	0.0244559	0	0.0244559	0.0244559	0.0366838	0	0	0.00883128
866	Synergistetes	Synergistia	Synergistales	Synergistaceae	Synergistaceae_unclassified	0	0.0244559	0.0366838	0	0	0	0	0	0.0366838	0	0	0	0	0.0244559	0	0	0	0.0366838	0.00883128
809	Firmicutes	Clostridia_1	Clostridiales	Lachnospiraceae	Candidatus_Arthromitus	0	0	0	0	0	0	0	0	0.110051	0.0244559	0	0	0.0244559	0	0	0	0	0	0.00883128
798	Candidate_phylum_BD1_5	Candidate_phylum_BD1_5_unclassified	Candidate_phylum_BD1_5_unclassified	Candidate_phylum_BD1_5_unclassified	Candidate_phylum_BD1_5_unclassified	0	0	0	0	0	0	0	0	0	0	0	0	0	0	0.0244559	0	0.0244559	0.110051	0.00883128
843	Firmicutes	Clostridia_1	Clostridiales	Ruminococcaceae	Termite_cockroach_cluster	0.0244559	0	0.110051	0	0	0	0	0	0	0	0	0	0	0	0.0244559	0	0	0	0.00883128
791	Bacteroidetes	Bacteroidia	Bacteroidales	Porphyromonadaceae_3	Porphyromonadaceae_3_unclassified	0	0	0.0733676	0	0	0	0	0.0244559	0.0366838	0	0	0	0	0.0244559	0	0	0	0	0.00883128
838	Firmicutes	Clostridia_1	Clostridiales	Ruminococcaceae	Ruminococcaceae_unclassified	0	0	0	0.0244559	0	0	0.0244559	0	0.0733676	0	0	0	0	0	0	0.0366838	0	0	0.00883128
860	Proteobacteria	Deltaproteobacteria	Desulfovibrionales	Desulfovibrionaceae	Gut_cluster_3	0	0	0	0	0	0	0.0244559	0	0	0	0.0244559	0	0	0	0	0.110051	0	0	0.00883128
761	Firmicutes	Clostridia_2	Clostridiales_1	Veillonellaceae	Uncultured_8	0	0.0978234	0	0	0	0	0	0	0	0	0.0244559	0	0	0.0244559	0	0	0	0	0.00815195
745	Firmicutes	Clostridia_1	Clostridiales	Lachnospiraceae	Lachnospiraceae_unclassified	0.0244559	0.0733676	0	0	0	0	0	0	0	0	0.0244559	0.0244559	0	0	0	0	0	0	0.00815195
718	Bacteroidetes	Bacteroidia	Bacteroidales	Porphyromonadaceae_3	Cluster_IV	0.0244559	0.0244559	0	0	0.0489117	0	0	0	0	0	0	0.0244559	0.0244559	0	0	0	0	0	0.00815195
722	Bacteroidetes	Bacteroidia	Bacteroidales	Porphyromonadaceae_3	Porphyromonadaceae_3_unclassified	0	0.0244559	0	0	0.0244559	0	0	0.0244559	0	0	0	0	0.0244559	0.0244559	0	0	0.0244559	0	0.00815195
772	Proteobacteria	Deltaproteobacteria	Desulfovibrionales	Desulfovibrionaceae	Gut_cluster_3	0.0733676	0.0244559	0	0	0	0	0	0.0489117	0	0	0	0	0	0	0	0	0	0	0.00815195
721	Bacteroidetes	Bacteroidia	Bacteroidales	Porphyromonadaceae_3	Cluster_IV	0	0.0489117	0	0	0	0.0244559	0	0	0	0	0.0489117	0	0	0	0.0244559	0	0	0	0.00815195
736	Firmicutes	Clostridia_1	Clostridiales	Family_XIII_Incertae_Sedis	Family_XIII_Incertae_Sedis_unclassified	0	0.0244559	0	0	0	0	0	0	0	0.0244559	0.0733676	0	0	0	0	0	0.0244559	0	0.00815195
748	Firmicutes	Clostridia_1	Clostridiales	Lachnospiraceae	Termite_cluster	0.0244559	0.0244559	0	0	0.0244559	0	0	0.0244559	0	0.0244559	0	0.0244559	0	0	0	0	0	0	0.00815195
762	Firmicutes	Erysipelotrichi	Erysipelotrichales	Erysipelotrichaceae	Incertae_Sedis_8	0	0	0	0.0244559	0.0244559	0	0	0	0	0	0	0	0	0	0	0	0.0978234	0	0.00815195
776	Proteobacteria	Deltaproteobacteria	Desulfovibrionales	Desulfovibrionaceae	Gut_cluster_3	0	0	0	0.0489117	0.0489117	0	0	0.0489117	0	0	0	0	0	0	0	0	0	0	0.00815195
780	Synergistetes	Synergistia	Synergistales	Synergistaceae	Synergistaceae_unclassified	0	0	0	0	0	0	0	0.0489117	0	0	0.0244559	0.0244559	0.0244559	0.0244559	0	0	0	0	0.00815195
695	Proteobacteria	Alphaproteobacteria	Rhizobiales_1	Phyllobacteriaceae	Phyllobacterium	0	0	0	0	0	0	0	0	0	0	0	0.0489117	0	0	0	0	0.0978234	0	0.00815195
711	Actinobacteria	Actinobacteria	Corynebacteriales	Corynebacteriales_unclassified	Corynebacteriales_unclassified	0.0244559	0	0	0	0	0	0	0	0	0	0.0733676	0.0489117	0	0	0	0	0	0	0.00815195
715	Bacteroidetes	Bacteroidia	Bacteroidales	Bacteroidaceae	Bacteroides	0.0489117	0	0	0.0244559	0	0	0	0.0244559	0	0	0	0	0.0244559	0	0.0244559	0	0	0	0.00815195
734	Firmicutes	Clostridia_1	Clostridiales	Clostridiales_unclassified	Clostridiales_unclassified	0	0.0244559	0	0	0	0	0	0	0	0.0244559	0.0244559	0	0.0244559	0.0244559	0.0244559	0	0	0	0.00815195
740	Firmicutes	Clostridia_1	Clostridiales	Lachnospiraceae	Gut_cluster_13	0	0.0244559	0	0.0244559	0.0244559	0	0.0489117	0.0244559	0	0	0	0	0	0	0	0	0	0	0.00815195
755	Firmicutes	Clostridia_1	Clostridiales	Ruminococcaceae	Ruminococcaceae_unclassified	0	0	0	0.0244559	0	0.0244559	0	0.0489117	0	0	0	0	0.0244559	0	0	0	0.0244559	0	0.00815195
764	Firmicutes	Firmicutes_unclassified	Firmicutes_unclassified	Firmicutes_unclassified	Firmicutes_unclassified	0	0.0244559	0	0	0	0	0.0244559	0.0244559	0	0	0	0	0	0.0244559	0.0244559	0	0.0244559	0	0.00815195
709	Actinobacteria	Actinobacteria	Actinomycetales	Actinomycetaceae_2	Actinomycetaceae_2_unclassified	0	0	0	0	0	0	0	0.0489117	0	0.0244559	0	0.0489117	0	0.0244559	0	0	0	0	0.00815195
714	Bacteroidetes	Bacteroidetes_unclassified	Bacteroidetes_unclassified	Bacteroidetes_unclassified	Bacteroidetes_unclassified	0.0244559	0.0244559	0	0	0.0489117	0	0.0489117	0	0	0	0	0	0	0	0	0	0	0	0.00815195
756	Firmicutes	Clostridia_1	Clostridiales	Ruminococcaceae	Ruminococcaceae_unclassified	0.0489117	0	0	0	0.0244559	0	0	0	0	0.0244559	0.0244559	0.0244559	0	0	0	0	0	0	0.00815195
763	Firmicutes	Firmicutes_unclassified	Firmicutes_unclassified	Firmicutes_unclassified	Firmicutes_unclassified	0	0.0244559	0	0.0244559	0	0	0	0	0	0.0244559	0	0	0	0.0489117	0	0	0.0244559	0	0.00815195
759	Firmicutes	Clostridia_1	Clostridiales	Ruminococcaceae	Uncultured_28	0.0244559	0	0	0.0489117	0	0	0	0	0	0.0489117	0	0	0	0	0	0	0.0244559	0	0.00815195
719	Bacteroidetes	Bacteroidia	Bacteroidales	Porphyromonadaceae_3	Cluster_IV	0	0	0	0	0	0	0.0244559	0	0	0	0.0489117	0	0	0.0489117	0	0	0.0244559	0	0.00815195
725	Bacteroidetes	Bacteroidia	Bacteroidales	Rikenellaceae	Alisitpes_IV	0.0244559	0	0	0.0244559	0.0489117	0	0.0244559	0	0	0	0	0	0	0.0244559	0	0	0	0	0.00815195
731	Firmicutes	Bacilli	Lactobacillales	Lactobacillales_unclassified	Lactobacillales_unclassified	0	0	0	0	0	0.0244559	0.0244559	0	0	0	0	0.0244559	0.0489117	0.0244559	0	0	0	0	0.00815195
770	Proteobacteria	Alphaproteobacteria	Rhizobiales_1	Phyllobacteriaceae	Aminobacter_1	0.0244559	0	0	0.0244559	0	0.0244559	0	0	0	0	0.0244559	0.0244559	0	0.0244559	0	0	0	0	0.00815195
765	Planctomycetes	Planctomycetacia	Planctomycetales	Planctomycetaceae	Gemmata	0	0	0	0	0	0.0244559	0.0244559	0	0	0	0	0.0489117	0.0244559	0	0.0244559	0	0	0	0.00815195
753	Firmicutes	Clostridia_1	Clostridiales	Ruminococcaceae	Ruminococcaceae_unclassified	0	0	0	0	0.0244559	0.0244559	0	0	0	0.0244559	0	0.0489117	0	0	0.0244559	0	0	0	0.00815195
742	Firmicutes	Clostridia_1	Clostridiales	Lachnospiraceae	Lachnospiraceae_unclassified	0	0	0	0.0244559	0	0.0489117	0	0	0	0	0	0	0	0.0489117	0	0	0.0244559	0	0.00815195
744	Firmicutes	Clostridia_1	Clostridiales	Lachnospiraceae	Lachnospiraceae_unclassified	0	0	0	0	0	0	0.0489117	0	0	0	0.0244559	0.0244559	0	0.0489117	0	0	0	0	0.00815195
752	Firmicutes	Clostridia_1	Clostridiales	Ruminococcaceae	Papillibacter	0.0244559	0.0244559	0	0	0	0.0489117	0.0244559	0	0	0	0	0	0	0.0244559	0	0	0	0	0.00815195
767	Planctomycetes	Planctomycetacia	Planctomycetales	Planctomycetaceae	Termite_cockroach_cluster_1	0	0	0	0	0	0.0244559	0	0.0244559	0	0.0489117	0	0.0244559	0	0	0.0244559	0	0	0	0.00815195
799	Chloroflexi	Thermomicrobia	JG30-KF-CM45	JG30-KF-CM45_unclassified	JG30-KF-CM45_unclassified	0	0.0244559	0	0.0244559	0	0	0	0	0	0	0.0244559	0	0	0	0	0.0366838	0	0.0366838	0.00815195
795	Bacteroidetes	Bacteroidia	Bacteroidales	Rikenellaceae	Alisitpes_IV	0.0244559	0	0.0366838	0	0	0	0	0	0.0366838	0	0	0	0.0244559	0.0244559	0	0	0	0	0.00815195
841	Firmicutes	Clostridia_1	Clostridiales	Ruminococcaceae	Ruminococcaceae_unclassified	0	0	0.0733676	0	0	0	0	0	0	0.0244559	0.0244559	0.0244559	0	0	0	0	0	0	0.00815195
835	Firmicutes	Clostridia_1	Clostridiales	Ruminococcaceae	Ruminococcaceae_unclassified	0	0	0	0	0	0	0.0489117	0	0	0	0	0	0	0.0244559	0	0	0	0.0733676	0.00815195
864	Proteobacteria	Deltaproteobacteria	Myxococcales	Myxococcales_unclassified	Myxococcales_unclassified	0	0	0	0	0	0	0.0244559	0	0.0733676	0.0489117	0	0	0	0	0	0	0	0	0.00815195
813	Firmicutes	Clostridia_1	Clostridiales	Lachnospiraceae	Gut_cluster_13	0	0.0489117	0.0366838	0	0.0244559	0	0	0	0	0	0	0	0	0	0.0244559	0	0	0	0.00747262
853	Planctomycetes	Planctomycetacia	Planctomycetales	Planctomycetaceae	Pir4_lineage	0	0.0489117	0.0366838	0	0	0.0244559	0	0	0	0	0	0	0.0244559	0	0	0	0	0	0.00747262
783	Actinobacteria	Actinobacteria	Actinomycetales_1	Streptomycetaceae	Streptomycetaceae_unclassified	0.0244559	0	0.0366838	0	0	0	0	0.0244559	0	0	0.0244559	0	0.0244559	0	0	0	0	0	0.00747262
787	Bacteroidetes	Bacteroidia	Bacteroidales	Porphyromonadaceae_1	Dysgonomonas	0	0.0244559	0	0	0	0	0	0	0	0	0	0.0244559	0.0244559	0.0244559	0	0.0366838	0	0	0.00747262
794	Bacteroidetes	Bacteroidia	Bacteroidales	Porphyromonadaceae_Gut_group	Mixed_gut_cluster	0	0	0	0	0	0	0	0	0	0	0.0244559	0	0.0489117	0	0.0244559	0	0	0.0366838	0.00747262
807	Firmicutes	Clostridia_1	Clostridiales	Clostridiales_unclassified	Clostridiales_unclassified	0	0.0244559	0	0	0	0	0	0	0	0.0244559	0.0489117	0	0	0	0	0	0	0.0366838	0.00747262
808	Firmicutes	Clostridia_1	Clostridiales	Family_XIII_Incertae_Sedis	Family_XIII_Incertae_Sedis_unclassified	0	0.0244559	0	0.0244559	0	0	0	0.0244559	0	0.0244559	0	0	0	0	0	0.0366838	0	0	0.00747262
811	Firmicutes	Clostridia_1	Clostridiales	Lachnospiraceae	Gut_cluster_13	0	0	0	0.0733676	0	0	0	0	0	0	0	0	0.0244559	0	0	0	0	0.0366838	0.00747262
815	Firmicutes	Clostridia_1	Clostridiales	Lachnospiraceae	Gut_cluster_13	0	0	0	0.0244559	0.0244559	0	0	0	0	0	0	0	0.0244559	0	0	0.0366838	0.0244559	0	0.00747262
819	Firmicutes	Clostridia_1	Clostridiales	Lachnospiraceae	Gut_cluster_13	0.0244559	0	0	0	0.0244559	0	0	0.0244559	0	0	0	0	0.0244559	0	0	0.0366838	0	0	0.00747262
801	Firmicutes	Bacilli	Bacilli_unclassified	Bacilli_unclassified	Bacilli_unclassified	0	0	0.0366838	0	0.0244559	0	0	0.0489117	0	0	0	0.0244559	0	0	0	0	0	0	0.00747262
818	Firmicutes	Clostridia_1	Clostridiales	Lachnospiraceae	Gut_cluster_13	0	0	0.0366838	0.0244559	0	0	0	0.0244559	0	0	0.0489117	0	0	0	0	0	0	0	0.00747262
829	Firmicutes	Clostridia_1	Clostridiales	Lachnospiraceae	Lachnospiraceae_unclassified	0.0244559	0.0244559	0	0	0	0	0	0	0.0366838	0.0244559	0	0	0	0	0	0	0.0244559	0	0.00747262
858	Proteobacteria	Deltaproteobacteria	Desulfovibrionales	Desulfovibrionaceae	Gut_cluster_3	0.0244559	0.0244559	0.0366838	0	0.0244559	0	0	0	0	0	0	0	0	0	0.0244559	0	0	0	0.00747262
862	Proteobacteria	Deltaproteobacteria	Desulfovibrionales	Desulfovibrionaceae	Gut_cluster_3	0	0.0244559	0	0	0	0	0.0244559	0	0	0	0.0244559	0.0244559	0	0	0	0.0366838	0	0	0.00747262
790	Bacteroidetes	Bacteroidia	Bacteroidales	Porphyromonadaceae_3	Porphyromonadaceae_3_unclassified	0	0.0244559	0.0366838	0	0	0	0	0	0	0	0	0.0489117	0	0.0244559	0	0	0	0	0.00747262
832	Firmicutes	Clostridia_1	Clostridiales	Ruminococcaceae	Anaerotruncus	0.0489117	0	0	0	0	0	0	0	0	0	0	0	0.0244559	0	0.0244559	0.0366838	0	0	0.00747262
837	Firmicutes	Clostridia_1	Clostridiales	Ruminococcaceae	Ruminococcaceae_unclassified	0	0	0	0	0	0	0	0	0	0.0244559	0.0244559	0.0244559	0.0244559	0	0	0	0	0.0366838	0.00747262
845	Firmicutes	Clostridia_1	Clostridiales	Ruminococcaceae	Termite_cockroach_cluster	0.0244559	0	0.0366838	0	0.0244559	0	0	0	0	0	0.0489117	0	0	0	0	0	0	0	0.00747262
788	Bacteroidetes	Bacteroidia	Bacteroidales	Porphyromonadaceae_1	Dysgonomonas	0	0	0.0366838	0.0244559	0.0244559	0	0	0	0	0	0	0	0	0	0.0244559	0	0.0244559	0	0.00747262
821	Firmicutes	Clostridia_1	Clostridiales	Lachnospiraceae	Gut_cluster_13	0.0244559	0.0244559	0	0	0	0	0	0	0.0366838	0.0489117	0	0	0	0	0	0	0	0	0.00747262
826	Firmicutes	Clostridia_1	Clostridiales	Lachnospiraceae	Lachnospiraceae_unclassified	0.0244559	0.0244559	0.0366838	0.0244559	0	0.0244559	0	0	0	0	0	0	0	0	0	0	0	0	0.00747262
867	Tenericutes	Mollicutes	RF9	RF9_unclassified	RF9_unclassified	0	0	0	0	0.0733676	0	0	0	0.0366838	0	0	0	0	0	0.0244559	0	0	0	0.00747262
793	Bacteroidetes	Bacteroidia	Bacteroidales	Porphyromonadaceae_Cluster_V	Termite_Cockroach_cluster	0	0.0244559	0	0	0	0	0.0489117	0	0.0366838	0	0	0.0244559	0	0	0	0	0	0	0.00747262
805	Firmicutes	Clostridia_1	Clostridiales	Clostridiales_unclassified	Clostridiales_unclassified	0	0	0	0	0.0244559	0	0.0244559	0	0	0	0	0.0489117	0	0	0	0.0366838	0	0	0.00747262
789	Bacteroidetes	Bacteroidia	Bacteroidales	Porphyromonadaceae_2	Porphyromonadaceae_2_unclassified	0	0	0	0	0	0	0.0244559	0	0	0.0244559	0	0	0	0	0	0	0.0489117	0.0366838	0.00747262
812	Firmicutes	Clostridia_1	Clostridiales	Lachnospiraceae	Gut_cluster_13	0.0244559	0	0	0	0	0	0	0	0.0366838	0.0244559	0	0.0244559	0	0	0.0244559	0	0	0	0.00747262
814	Firmicutes	Clostridia_1	Clostridiales	Lachnospiraceae	Gut_cluster_13	0.0244559	0	0	0	0.0244559	0.0244559	0	0	0.0366838	0	0	0	0	0	0	0	0.0244559	0	0.00747262
840	Firmicutes	Clostridia_1	Clostridiales	Ruminococcaceae	Ruminococcaceae_unclassified	0.0489117	0	0	0	0	0	0	0	0	0	0	0	0	0	0.0489117	0	0	0.0366838	0.00747262
844	Firmicutes	Clostridia_1	Clostridiales	Ruminococcaceae	Termite_cockroach_cluster	0	0	0	0	0.0244559	0	0.0244559	0	0.0366838	0	0.0244559	0	0	0	0.0244559	0	0	0	0.00747262
817	Firmicutes	Clostridia_1	Clostridiales	Lachnospiraceae	Gut_cluster_13	0.0244559	0	0	0.0244559	0	0.0244559	0	0	0	0	0	0	0	0	0.0244559	0	0	0.0366838	0.00747262
859	Proteobacteria	Deltaproteobacteria	Desulfovibrionales	Desulfovibrionaceae	Gut_cluster_3	0	0	0	0	0.0244559	0.0244559	0	0	0.0366838	0	0	0.0244559	0	0.0244559	0	0	0	0	0.00747262
863	Proteobacteria	Deltaproteobacteria	Desulfovibrionales	Desulfovibrionaceae	Gut_cluster_3	0	0	0	0	0	0.0244559	0	0	0	0	0	0	0.0244559	0.0489117	0	0	0	0.0366838	0.00747262
865	Proteobacteria	Proteobacteria_unclassified	Proteobacteria_unclassified	Proteobacteria_unclassified	Proteobacteria_unclassified	0.0489117	0	0	0	0	0	0	0	0.0366838	0.0244559	0	0	0	0.0244559	0	0	0	0	0.00747262
784	Actinobacteria	Actinobacteria	Propionibacteriales	Nocardioidaceae	Marmoricola	0	0	0	0	0	0	0.0489117	0	0	0	0	0	0	0.0244559	0	0.0366838	0.0244559	0	0.00747262
827	Firmicutes	Clostridia_1	Clostridiales	Lachnospiraceae	Lachnospiraceae_unclassified	0	0	0.0366838	0	0	0	0.0244559	0	0	0.0489117	0	0.0244559	0	0	0	0	0	0	0.00747262
851	Firmicutes	Clostridia_2	Clostridiales_1	Veillonellaceae	Uncultured_7	0	0	0	0	0	0.0244559	0.0244559	0.0244559	0	0	0	0	0	0	0.0244559	0	0	0.0366838	0.00747262
816	Firmicutes	Clostridia_1	Clostridiales	Lachnospiraceae	Gut_cluster_13	0	0	0	0	0.0244559	0.0244559	0.0244559	0	0	0	0	0	0	0	0.0244559	0.0366838	0	0	0.00747262
825	Firmicutes	Clostridia_1	Clostridiales	Lachnospiraceae	Lachnospiraceae_unclassified	0	0	0	0	0.0244559	0.0244559	0	0	0	0	0	0	0	0.0489117	0	0.0366838	0	0	0.00747262
831	Firmicutes	Clostridia_1	Clostridiales	Lachnospiraceae	Lachnospiraceae_unclassified	0	0	0	0	0	0	0.0489117	0	0.0366838	0	0	0.0244559	0	0.0244559	0	0	0	0	0.00747262
854	Planctomycetes	Planctomycetacia	Planctomycetales	Planctomycetaceae	Singulisphaera	0	0	0	0	0	0.0489117	0.0244559	0.0244559	0	0	0	0	0	0	0	0.0366838	0	0	0.00747262
885	Bacteroidetes	Bacteroidetes_unclassified	Bacteroidetes_unclassified	Bacteroidetes_unclassified	Bacteroidetes_unclassified	0	0.0244559	0	0	0	0	0	0	0.0366838	0	0	0	0	0	0	0.0366838	0	0.0366838	0.00747262
895	Bacteroidetes	Bacteroidia	Bacteroidales	Porphyromonadaceae_2	Porphyromonadaceae_2_unclassified	0	0	0	0	0	0	0	0.0244559	0	0	0	0	0	0	0	0.0366838	0	0.0733676	0.00747262
905	Bacteroidetes	Bacteroidia	Bacteroidales	Porphyromonadaceae_Gut_group	Termite_cluster_I	0	0	0.0733676	0	0	0	0	0	0	0	0	0	0	0	0	0	0.0244559	0.0366838	0.00747262
915	Firmicutes	Clostridia_1	Clostridiales	Clostridiales_unclassified	Clostridiales_unclassified	0	0	0	0	0	0	0	0	0.0366838	0	0	0.0244559	0	0	0	0	0	0.0733676	0.00747262
897	Bacteroidetes	Bacteroidia	Bacteroidales	Porphyromonadaceae_3	Porphyromonadaceae_3_unclassified	0	0	0.0366838	0	0	0	0	0	0	0	0	0	0	0.0244559	0	0	0	0.0733676	0.00747262
903	Bacteroidetes	Bacteroidia	Bacteroidales	Porphyromonadaceae_Cluster_V	Porphyromonadaceae_Cluster_V_unclassified	0	0	0	0	0	0.0244559	0	0	0.0366838	0	0	0	0	0	0	0.0366838	0	0.0366838	0.00747262
804	Firmicutes	Clostridia_1	Clostridiales	Clostridiales_unclassified	Clostridiales_unclassified	0	0.0733676	0	0.0244559	0.0244559	0	0	0	0	0	0	0	0	0	0	0	0	0	0.00679329
855	Planctomycetes	Planctomycetacia	Planctomycetales	Planctomycetaceae	Termite_cockroach_cluster_1	0.0489117	0.0733676	0	0	0	0	0	0	0	0	0	0	0	0	0	0	0	0	0.00679329
848	Firmicutes	Clostridia_2	Clostridiales_1	Peptococcaceae_1	Peptococcaceae_1_unclassified	0	0	0	0	0.0244559	0	0	0	0	0	0	0.0244559	0.0733676	0	0	0	0	0	0.00679329
861	Proteobacteria	Deltaproteobacteria	Desulfovibrionales	Desulfovibrionaceae	Gut_cluster_3	0	0.0244559	0	0.0244559	0	0	0	0	0	0	0	0.0489117	0.0244559	0	0	0	0	0	0.00679329
873	unknown	unknown_unclassified	unknown_unclassified	unknown_unclassified	unknown_unclassified	0.0244559	0.0489117	0	0.0244559	0	0	0	0	0	0	0	0	0	0.0244559	0	0	0	0	0.00679329
803	Firmicutes	Bacilli	Lactobacillales	Lactobacillales_unclassified	Lactobacillales_unclassified	0	0.0244559	0	0	0	0	0	0.0244559	0	0	0.0489117	0	0	0.0244559	0	0	0	0	0.00679329
849	Firmicutes	Clostridia_2	Clostridiales_1	Peptococcaceae_1	Peptococcaceae_1_unclassified	0.0244559	0.0244559	0	0.0244559	0	0	0	0	0	0	0	0	0.0244559	0.0244559	0	0	0	0	0.00679329
850	Firmicutes	Clostridia_2	Clostridiales_1	Veillonellaceae	Dendrosporobacter	0.0244559	0.0244559	0	0.0489117	0	0	0	0	0	0	0.0244559	0	0	0	0	0	0	0	0.00679329
806	Firmicutes	Clostridia_1	Clostridiales	Clostridiales_unclassified	Clostridiales_unclassified	0	0	0	0.0244559	0.0244559	0	0	0.0244559	0	0	0.0489117	0	0	0	0	0	0	0	0.00679329
847	Firmicutes	Clostridia_1	Clostridiales	Ruminococcaceae	Uncultured_12	0.0244559	0.0244559	0	0	0	0	0	0.0489117	0	0	0	0	0	0.0244559	0	0	0	0	0.00679329
869	Verrucomicrobia	Opitutae	Opitutales	Opitutaceae	Opitutus	0.0978234	0.0244559	0	0	0	0	0	0	0	0	0	0	0	0	0	0	0	0	0.00679329
833	Firmicutes	Clostridia_1	Clostridiales	Ruminococcaceae	Gut_cluster_4	0	0.0244559	0	0	0	0	0.0244559	0	0	0	0.0489117	0.0244559	0	0	0	0	0	0	0.00679329
852	Fusobacteria	Fusobacteria	Fusobacteriales	Fusobacteriales_unclassified	Fusobacteriales_unclassified	0	0	0	0.0489117	0	0	0	0.0489117	0	0	0	0.0244559	0	0	0	0	0	0	0.00679329
839	Firmicutes	Clostridia_1	Clostridiales	Ruminococcaceae	Ruminococcaceae_unclassified	0	0.0489117	0	0	0	0.0244559	0	0	0	0	0.0244559	0	0	0.0244559	0	0	0	0	0.00679329
846	Firmicutes	Clostridia_1	Clostridiales	Ruminococcaceae	Termite_cockroach_cluster	0.0489117	0	0	0	0.0244559	0	0	0.0489117	0	0	0	0	0	0	0	0	0	0	0.00679329
823	Firmicutes	Clostridia_1	Clostridiales	Lachnospiraceae	Gut_cluster_13	0.0244559	0	0	0	0	0.0244559	0	0	0	0	0	0.0244559	0.0489117	0	0	0	0	0	0.00679329
842	Firmicutes	Clostridia_1	Clostridiales	Ruminococcaceae	Ruminococcaceae_unclassified	0	0	0	0.0244559	0	0	0.0244559	0	0	0	0	0.0489117	0.0244559	0	0	0	0	0	0.00679329
857	Proteobacteria	Betaproteobacteria	Betaproteobacteria_unclassified	Betaproteobacteria_unclassified	Betaproteobacteria_unclassified	0	0	0	0	0.0489117	0	0	0	0	0	0	0.0244559	0.0244559	0.0244559	0	0	0	0	0.00679329
871	unknown	unknown_unclassified	unknown_unclassified	unknown_unclassified	unknown_unclassified	0.0489117	0	0	0	0.0489117	0	0	0	0	0	0	0	0	0	0	0	0.0244559	0	0.00679329
796	Bacteroidetes	Bacteroidia	Bacteroidales	Rikenellaceae	BCf9-17_termite_group	0	0.0489117	0	0	0	0	0.0733676	0	0	0	0	0	0	0	0	0	0	0	0.00679329
797	Bacteroidetes	Bacteroidia	Bacteroidales	Rikenellaceae	Rikenellaceae_unclassified	0.0489117	0.0244559	0	0	0	0	0.0244559	0	0	0	0	0	0	0	0.0244559	0	0	0	0.00679329
834	Firmicutes	Clostridia_1	Clostridiales	Ruminococcaceae	Insect_cluster	0.0244559	0.0244559	0	0	0.0244559	0.0244559	0	0	0	0	0	0	0	0	0	0	0.0244559	0	0.00679329
856	Proteobacteria	Alphaproteobacteria	Rhizobiales_2	Hyphomicrobiaceae_1	Ancylobacter	0	0	0	0	0.0244559	0	0	0	0	0	0	0.0733676	0	0	0	0	0.0244559	0	0.00679329
766	Planctomycetes	Planctomycetacia	Planctomycetales	Planctomycetaceae	Pir4_lineage	0	0	0	0	0	0	0.0244559	0	0	0.0244559	0	0	0.0489117	0	0.0244559	0	0	0	0.00679329
785	Bacteroidetes	Bacteroidetes_unclassified	Bacteroidetes_unclassified	Bacteroidetes_unclassified	Bacteroidetes_unclassified	0.0244559	0	0	0	0	0.0244559	0	0.0489117	0	0	0.0244559	0	0	0	0	0	0	0	0.00679329
836	Firmicutes	Clostridia_1	Clostridiales	Ruminococcaceae	Ruminococcaceae_unclassified	0	0.0244559	0	0	0	0	0	0	0	0.0244559	0	0	0	0.0489117	0	0	0.0244559	0	0.00679329
828	Firmicutes	Clostridia_1	Clostridiales	Lachnospiraceae	Lachnospiraceae_unclassified	0	0	0	0	0	0.0244559	0	0	0	0.0244559	0	0	0.0489117	0.0244559	0	0	0	0	0.00679329
792	Bacteroidetes	Bacteroidia	Bacteroidales	Porphyromonadaceae_Cluster_V	Porphyromonadaceae_Cluster_V_unclassified	0	0	0	0	0	0	0.0244559	0.0244559	0	0	0	0.0489117	0	0.0244559	0	0	0	0	0.00679329
830	Firmicutes	Clostridia_1	Clostridiales	Lachnospiraceae	Lachnospiraceae_unclassified	0	0	0	0.0489117	0	0.0244559	0	0.0244559	0	0.0244559	0	0	0	0	0	0	0	0	0.00679329
786	Bacteroidetes	Bacteroidia	Bacteroidales	Bacteroidales_unclassified	Bacteroidales_unclassified	0	0	0	0.0244559	0	0	0	0	0	0.0244559	0	0	0	0.0244559	0.0244559	0	0.0244559	0	0.00679329
820	Firmicutes	Clostridia_1	Clostridiales	Lachnospiraceae	Gut_cluster_13	0.0244559	0	0	0	0	0.0489117	0	0	0	0	0	0.0244559	0.0244559	0	0	0	0	0	0.00679329
822	Firmicutes	Clostridia_1	Clostridiales	Lachnospiraceae	Gut_cluster_13	0	0	0	0.0244559	0.0244559	0	0.0489117	0	0	0	0	0	0	0	0.0244559	0	0	0	0.00679329
872	unknown	unknown_unclassified	unknown_unclassified	unknown_unclassified	unknown_unclassified	0.0244559	0	0	0	0	0	0	0	0	0.0489117	0	0.0244559	0	0.0244559	0	0	0	0	0.00679329
802	Firmicutes	Bacilli	Lactobacillales	Lactobacillales_unclassified	Lactobacillales_unclassified	0	0	0	0	0.0244559	0	0	0	0	0.0978234	0	0	0	0	0	0	0	0	0.00679329
962	Firmicutes	Clostridia_1	Clostridiales	Ruminococcaceae	Ruminococcaceae_unclassified	0.0244559	0.0244559	0	0	0	0	0	0	0.0366838	0	0	0	0	0	0	0.0366838	0	0	0.00679329
920	Firmicutes	Clostridia_1	Clostridiales	Lachnospiraceae	Gut_cluster_13	0	0	0	0	0	0	0	0.0244559	0.0366838	0	0.0244559	0	0	0	0	0	0	0.0366838	0.00679329
976	Firmicutes	Clostridia_2	Clostridiales_1	Veillonellaceae	Uncultured_7	0	0.0244559	0.0733676	0	0	0	0	0	0	0	0	0	0	0	0.0244559	0	0	0	0.00679329
986	Fusobacteria	Fusobacteria	Fusobacteriales	Leptotrichiaceae	Leptotrichiaceae_unclassified	0	0	0	0	0	0	0	0.0489117	0.0366838	0	0	0	0	0	0	0.0366838	0	0	0.00679329
889	Bacteroidetes	Bacteroidia	Bacteroidales	Bacteroidales_unclassified	Bacteroidales_unclassified	0	0	0.0366838	0.0244559	0	0	0	0	0.0366838	0	0	0	0	0	0	0	0.0244559	0	0.00679329
997	Proteobacteria	Alphaproteobacteria	Alphaproteobacteria_unclassified	Alphaproteobacteria_unclassified	Alphaproteobacteria_unclassified	0.0244559	0	0	0.0244559	0	0	0	0	0.0366838	0	0	0	0	0	0	0.0366838	0	0	0.00679329
1013	Proteobacteria	Deltaproteobacteria	Desulfovibrionales	Desulfovibrionaceae	Gut_cluster_3	0	0	0	0	0	0	0	0	0	0	0.0244559	0	0	0	0	0.0733676	0.0244559	0	0.00679329
1016	Proteobacteria	Gammaproteobacteria_1	Enterobacteriales	Enterobacteriaceae	Enterobacteriaceae_unclassified	0.0489117	0	0	0	0	0	0	0	0	0	0	0	0	0	0	0.0733676	0	0	0.00679329
824	Firmicutes	Clostridia_1	Clostridiales	Lachnospiraceae	Lachnospiraceae_unclassified	0	0	0	0	0	0	0	0	0	0	0	0	0	0.0244559	0	0	0.0244559	0.0733676	0.00679329
1000	Proteobacteria	Alphaproteobacteria	Rhizobiales_2	Rhizobiales_2_unclassified	Rhizobiales_2_unclassified	0	0	0	0	0	0	0	0.0244559	0	0	0	0	0	0.0244559	0	0.0733676	0	0	0.00679329
1011	Proteobacteria	Deltaproteobacteria	Desulfovibrionales	Desulfovibrionaceae	Gut_cluster_3	0	0	0	0.0244559	0	0	0	0	0.0366838	0	0	0	0	0	0.0244559	0	0	0.0366838	0.00679329
1003	Proteobacteria	Alphaproteobacteria	Rhodobacterales	Rhodobacterales_unclassified	Rhodobacterales_unclassified	0	0	0	0	0	0	0.0244559	0	0	0	0	0	0	0	0	0	0.0244559	0.0733676	0.00679329
911	Firmicutes	Bacilli	Lactobacillales	Streptococcaceae	Lactococcus_2	0	0	0	0	0	0	0	0	0	0	0	0	0	0	0.0489117	0.0733676	0	0	0.00679329
954	Firmicutes	Clostridia_1	Clostridiales	Ruminococcaceae	Ruminococcaceae_unclassified	0	0	0	0	0	0	0.0244559	0	0	0	0	0.0244559	0	0	0	0.0733676	0	0	0.00679329
999	Proteobacteria	Alphaproteobacteria	Rhizobiales_2	Bradyrhizobiaceae	Bradyrhizobiaceae_unclassified	0.0244559	0	0	0	0	0	0.0244559	0	0	0	0	0	0	0	0	0	0	0.0733676	0.00679329
870	Verrucomicrobia	Verrucomicrobiae	Verrucomicrobiales	Verrucomicrobiaceae_1	Luteolibacter_2	0	0	0.0366838	0	0	0	0.0244559	0	0.0366838	0.0244559	0	0	0	0	0	0	0	0	0.00679329
1002	Proteobacteria	Alphaproteobacteria	Rhodobacterales	Rhodobacteraceae_1	Rhodobacteraceae_1_unclassified	0	0	0	0	0	0	0.0244559	0	0	0.0244559	0	0	0	0	0	0	0	0.0733676	0.00679329
1005	Proteobacteria	Deltaproteobacteria	Deltaproteobacteria_unclassified	Deltaproteobacteria_unclassified	Deltaproteobacteria_unclassified	0	0	0.0366838	0	0	0.0244559	0	0	0.0366838	0	0	0.0244559	0	0	0	0	0	0	0.00679329
921	Firmicutes	Clostridia_1	Clostridiales	Lachnospiraceae	Gut_cluster_13	0	0.0733676	0	0	0	0	0	0	0	0	0	0	0	0	0	0	0	0.0366838	0.00611396
977	Firmicutes	Clostridia_2	Clostridiales_1	Veillonellaceae	Uncultured_8	0	0.0244559	0	0	0	0	0	0	0	0	0.0244559	0	0.0244559	0	0	0	0	0.0366838	0.00611396
916	Firmicutes	Clostridia_1	Clostridiales	Family_XIII_Incertae_Sedis	Family_XIII_Incertae_Sedis_unclassified	0	0.0244559	0	0	0	0	0	0	0	0	0	0	0	0	0	0.0366838	0.0489117	0	0.00611396
876	Actinobacteria	Actinobacteria	Actinobacteria_unclassified	Actinobacteria_unclassified	Actinobacteria_unclassified	0.0244559	0.0244559	0	0	0	0	0	0	0	0	0.0244559	0	0	0	0	0.0366838	0	0	0.00611396
932	Firmicutes	Clostridia_1	Clostridiales	Lachnospiraceae	Gut_cluster_13	0	0	0	0	0	0	0	0.0244559	0	0	0	0	0.0244559	0	0	0	0.0244559	0.0366838	0.00611396
953	Firmicutes	Clostridia_1	Clostridiales	Ruminococcaceae	Ruminococcaceae_unclassified	0	0	0	0	0.0244559	0	0	0	0	0	0.0244559	0	0.0244559	0	0	0	0	0.0366838	0.00611396
910	Firmicutes	Bacilli	Lactobacillales	Lactobacillales_unclassified	Lactobacillales_unclassified	0	0	0	0	0	0	0	0	0	0	0	0.0244559	0.0244559	0	0	0	0.0244559	0.0366838	0.00611396
934	Firmicutes	Clostridia_1	Clostridiales	Lachnospiraceae	Gut_cluster_13	0	0	0	0	0	0	0	0	0	0	0.0244559	0.0244559	0.0244559	0	0	0.0366838	0	0	0.00611396
952	Firmicutes	Clostridia_1	Clostridiales	Ruminococcaceae	Ruminococcaceae_unclassified	0	0.0244559	0.0366838	0	0.0244559	0	0	0	0	0	0	0	0	0	0.0244559	0	0	0	0.00611396
982	Firmicutes	Firmicutes_unclassified	Firmicutes_unclassified	Firmicutes_unclassified	Firmicutes_unclassified	0	0	0.0366838	0	0	0	0	0.0733676	0	0	0	0	0	0	0	0	0	0	0.00611396
988	Planctomycetes	Planctomycetacia	Planctomycetales	Planctomycetaceae	Planctomycetaceae_unclassified	0	0	0	0.0244559	0	0	0	0	0.0366838	0	0.0244559	0	0.0244559	0	0	0	0	0	0.00611396
1017	Proteobacteria	Gammaproteobacteria_1	Enterobacteriales	Enterobacteriaceae	Enterobacteriaceae_unclassified	0	0.0244559	0	0	0	0	0	0	0.0366838	0	0.0244559	0	0	0.0244559	0	0	0	0	0.00611396
907	Firmicutes	Bacilli	Lactobacillales	Lactobacillales_unclassified	Lactobacillales_unclassified	0	0	0	0.0244559	0	0	0	0.0244559	0	0	0.0244559	0	0	0	0	0.0366838	0	0	0.00611396
949	Firmicutes	Clostridia_1	Clostridiales	Ruminococcaceae	Ruminococcaceae_unclassified	0	0	0	0	0	0	0	0.0244559	0.0366838	0	0	0	0	0	0	0	0.0489117	0	0.00611396
881	Actinobacteria	Actinobacteria	Micrococcales_2	Promicromonospiraceae	Cellulosimicrobium	0	0.0244559	0	0	0	0.0244559	0	0	0.0366838	0	0.0244559	0	0	0	0	0	0	0	0.00611396
912	Firmicutes	Clostridia_1	Clostridiales	Clostridiales_unclassified	Clostridiales_unclassified	0	0	0	0.0489117	0	0	0	0	0	0	0	0.0244559	0	0	0	0.0366838	0	0	0.00611396
939	Firmicutes	Clostridia_1	Clostridiales	Lachnospiraceae	Lachnospiraceae_unclassified	0.0244559	0	0.0366838	0	0.0244559	0	0	0	0	0	0	0.0244559	0	0	0	0	0	0	0.00611396
974	Firmicutes	Clostridia_2	Clostridiales_1	Peptococcaceae_1	Uncultured_2	0	0	0	0.0244559	0	0	0	0	0	0	0	0	0.0244559	0.0244559	0	0.0366838	0	0	0.00611396
981	Firmicutes	Firmicutes_unclassified	Firmicutes_unclassified	Firmicutes_unclassified	Firmicutes_unclassified	0	0	0.0366838	0	0	0	0	0	0	0	0	0.0244559	0	0	0	0	0.0489117	0	0.00611396
995	Proteobacteria	Alphaproteobacteria	Alphaproteobacteria_unclassified	Alphaproteobacteria_unclassified	Alphaproteobacteria_unclassified	0.0489117	0	0	0	0	0	0	0.0244559	0.0366838	0	0	0	0	0	0	0	0	0	0.00611396
998	Proteobacteria	Alphaproteobacteria	Rhizobiales_1	Hyphomicrobiaceae	Hyphomicrobiaceae_unclassified	0	0	0	0	0	0	0	0	0	0.0244559	0	0	0.0244559	0	0	0	0.0244559	0.0366838	0.00611396
1009	Proteobacteria	Deltaproteobacteria	Desulfovibrionales	Desulfovibrionaceae	Gut_cluster_3	0	0.0244559	0.0366838	0	0	0	0	0	0	0	0	0	0	0.0244559	0.0244559	0	0	0	0.00611396
1014	Proteobacteria	Deltaproteobacteria	Desulfovibrionales	Desulfovibrionales_unclassified	Desulfovibrionales_unclassified	0	0	0	0	0.0244559	0	0	0	0	0	0.0244559	0.0244559	0	0	0	0.0366838	0	0	0.00611396
883	Actinobacteria	Actinobacteria	Solirubrobacterales	Cluster_480-2	Cluster_480-2_unclassified	0	0	0	0	0	0	0	0	0.0366838	0	0	0	0	0	0.0244559	0	0.0489117	0	0.00611396
898	Bacteroidetes	Bacteroidia	Bacteroidales	Porphyromonadaceae_3	Porphyromonadaceae_3_unclassified	0	0	0	0	0	0	0	0	0.0366838	0.0244559	0	0.0244559	0.0244559	0	0	0	0	0	0.00611396
1021	Tenericutes	Mollicutes	RF9	RF9_unclassified	RF9_unclassified	0	0	0	0	0.0244559	0	0	0.0244559	0.0366838	0	0	0	0	0	0.0244559	0	0	0	0.00611396
891	Bacteroidetes	Bacteroidia	Bacteroidales	Bacteroidales_unclassified	Bacteroidales_unclassified	0	0	0	0.0244559	0	0	0	0	0	0	0	0.0244559	0	0	0.0244559	0	0	0.0366838	0.00611396
896	Bacteroidetes	Bacteroidia	Bacteroidales	Porphyromonadaceae_3	Porphyromonadaceae_3_unclassified	0	0	0	0	0	0	0.0244559	0	0	0	0.0244559	0	0	0	0	0.0366838	0.0244559	0	0.00611396
904	Bacteroidetes	Bacteroidia	Bacteroidales	Porphyromonadaceae_Cluster_V	Termite_Cockroach_cluster	0	0	0	0	0	0	0	0	0	0	0	0.0733676	0	0	0	0.0366838	0	0	0.00611396
906	Firmicutes	Bacilli	Lactobacillales	Lactobacillales_unclassified	Lactobacillales_unclassified	0	0	0.0366838	0	0	0	0	0.0244559	0	0	0	0.0244559	0	0	0.0244559	0	0	0	0.00611396
927	Firmicutes	Clostridia_1	Clostridiales	Lachnospiraceae	Gut_cluster_13	0	0	0	0	0	0	0	0	0	0	0.0244559	0.0244559	0	0	0.0244559	0.0366838	0	0	0.00611396
946	Firmicutes	Clostridia_1	Clostridiales	Ruminococcaceae	Gut_cluster_7	0	0	0.0366838	0	0	0	0.0244559	0.0244559	0	0	0.0244559	0	0	0	0	0	0	0	0.00611396
990	Planctomycetes	Planctomycetacia	Planctomycetales	Planctomycetaceae	Singulisphaera	0	0	0	0.0244559	0	0	0	0	0	0	0	0	0	0	0.0244559	0.0366838	0.0244559	0	0.00611396
1008	Proteobacteria	Deltaproteobacteria	Desulfovibrionales	Desulfovibrionaceae	Gut_cluster_3	0	0	0.0366838	0.0244559	0	0	0	0.0244559	0	0	0	0	0	0.0244559	0	0	0	0	0.00611396
968	Firmicutes	Clostridia_1	Clostridiales	Ruminococcaceae	Termite_cockroach_cluster	0	0	0	0	0	0	0	0	0	0	0	0.0489117	0	0	0.0244559	0	0	0.0366838	0.00611396
931	Firmicutes	Clostridia_1	Clostridiales	Lachnospiraceae	Gut_cluster_13	0.0244559	0	0.0366838	0	0	0	0.0244559	0	0	0	0	0.0244559	0	0	0	0	0	0	0.00611396
940	Firmicutes	Clostridia_1	Clostridiales	Lachnospiraceae	Termite_cluster	0	0	0.0366838	0	0	0	0.0244559	0	0	0	0	0.0244559	0	0	0	0	0.0244559	0	0.00611396
925	Firmicutes	Clostridia_1	Clostridiales	Lachnospiraceae	Gut_cluster_13	0	0	0	0	0	0.0244559	0	0	0	0	0	0	0.0244559	0	0.0244559	0	0	0.0366838	0.00611396
945	Firmicutes	Clostridia_1	Clostridiales	Ruminococcaceae	Gut_cluster_7	0	0	0	0	0	0	0.0244559	0	0.0366838	0	0	0.0489117	0	0	0	0	0	0	0.00611396
1001	Proteobacteria	Alphaproteobacteria	Rhizobiales_2	Xanthobacteraceae	Uncultured_1	0	0	0	0	0	0	0	0	0	0	0	0.0244559	0	0	0.0489117	0	0	0.0366838	0.00611396
1019	Synergistetes	Synergistia	Synergistales	Synergistaceae	Synergistaceae_unclassified	0	0	0	0	0	0	0	0.0244559	0	0.0489117	0	0	0	0	0	0.0366838	0	0	0.00611396
991	Planctomycetes	Planctomycetacia	Planctomycetales	Planctomycetaceae	Termite_cockroach_cluster_2	0.0244559	0	0	0	0	0.0244559	0	0	0	0	0	0	0	0	0	0	0.0244559	0.0366838	0.00611396
994	Planctomycetes	Planctomycetacia	Planctomycetales	Planctomycetaceae	Termite_cockroach_cluster_2	0	0	0	0	0.0244559	0.0244559	0	0	0	0	0	0.0244559	0	0	0	0	0	0.0366838	0.00611396
880	Actinobacteria	Actinobacteria	Corynebacteriales	Corynebacteriales_unclassified	Corynebacteriales_unclassified	0	0	0	0	0	0.0244559	0	0	0	0.0244559	0	0	0	0	0	0.0366838	0.0244559	0	0.00611396
1076	Bacteroidetes	Bacteroidia	Bacteroidales	Porphyromonadaceae_Cluster_V	Porphyromonadaceae_Cluster_V_unclassified	0	0	0	0	0	0	0	0	0	0	0	0	0	0	0	0.0733676	0	0.0366838	0.00611396
1152	Firmicutes	Clostridia_1	Clostridiales	Ruminococcaceae	Gut_cluster_7	0	0	0	0	0	0	0	0	0.0733676	0	0	0	0	0	0	0.0366838	0	0	0.00611396
1212	Firmicutes	Firmicutes_unclassified	Firmicutes_unclassified	Firmicutes_unclassified	Firmicutes_unclassified	0	0	0.0733676	0	0	0	0	0	0	0	0	0	0	0	0	0.0366838	0	0	0.00611396
929	Firmicutes	Clostridia_1	Clostridiales	Lachnospiraceae	Gut_cluster_13	0	0.0489117	0	0	0	0	0	0	0	0	0	0	0.0489117	0	0	0	0	0	0.00543463
913	Firmicutes	Clostridia_1	Clostridiales	Clostridiales_unclassified	Clostridiales_unclassified	0	0.0489117	0	0	0	0	0	0.0244559	0	0	0	0	0	0	0.0244559	0	0	0	0.00543463
956	Firmicutes	Clostridia_1	Clostridiales	Ruminococcaceae	Ruminococcaceae_unclassified	0	0.0244559	0	0	0	0	0	0	0	0	0	0	0.0489117	0.0244559	0	0	0	0	0.00543463
987	Planctomycetes	Planctomycetacia	Planctomycetales	Planctomycetaceae	Planctomyces_1	0	0.0244559	0	0	0	0	0	0.0244559	0	0	0.0489117	0	0	0	0	0	0	0	0.00543463
941	Firmicutes	Clostridia_1	Clostridiales	Ruminococcaceae	Gut_cluster_1	0	0.0489117	0	0	0	0	0.0244559	0	0	0	0.0244559	0	0	0	0	0	0	0	0.00543463
947	Firmicutes	Clostridia_1	Clostridiales	Ruminococcaceae	Hydrogenoanaerobacterium	0	0.0244559	0	0.0489117	0	0	0	0	0	0	0.0244559	0	0	0	0	0	0	0	0.00543463
950	Firmicutes	Clostridia_1	Clostridiales	Ruminococcaceae	Ruminococcaceae_unclassified	0.0244559	0	0	0	0	0	0	0.0244559	0	0	0	0	0.0489117	0	0	0	0	0	0.00543463
959	Firmicutes	Clostridia_1	Clostridiales	Ruminococcaceae	Ruminococcaceae_unclassified	0	0.0244559	0	0	0.0244559	0	0	0	0	0	0.0489117	0	0	0	0	0	0	0	0.00543463
1006	Proteobacteria	Deltaproteobacteria	Desulfobacterales	Desulfobacteraceae	Desulfatiferula	0	0.0244559	0	0.0244559	0.0244559	0	0	0	0	0	0.0244559	0	0	0	0	0	0	0	0.00543463
1015	Proteobacteria	Epsilonproteobacteria	Campylobacterales	Campylobacteraceae	Sulfurospirillum	0	0	0	0.0489117	0	0	0	0	0	0	0	0	0.0489117	0	0	0	0	0	0.00543463
887	Bacteroidetes	Bacteroidia	Bacteroidales	Bacteroidaceae	Bacteroides	0	0	0	0	0	0	0	0	0	0	0	0.0489117	0.0489117	0	0	0	0	0	0.00543463
969	Firmicutes	Clostridia_1	Clostridiales	Ruminococcaceae	Termite_cockroach_cluster	0	0	0	0.0489117	0	0	0	0.0244559	0	0	0	0	0.0244559	0	0	0	0	0	0.00543463
923	Firmicutes	Clostridia_1	Clostridiales	Lachnospiraceae	Gut_cluster_13	0	0.0489117	0	0	0	0.0244559	0	0	0	0	0	0	0	0	0	0	0.0244559	0	0.00543463
926	Firmicutes	Clostridia_1	Clostridiales	Lachnospiraceae	Gut_cluster_13	0	0	0	0	0	0	0	0	0	0	0.0244559	0.0244559	0.0244559	0	0	0	0.0244559	0	0.00543463
933	Firmicutes	Clostridia_1	Clostridiales	Lachnospiraceae	Gut_cluster_13	0	0.0244559	0	0	0.0244559	0	0.0244559	0	0	0	0	0	0.0244559	0	0	0	0	0	0.00543463
978	Firmicutes	Firmicutes_unclassified	Firmicutes_unclassified	Firmicutes_unclassified	Firmicutes_unclassified	0.0244559	0	0	0	0	0	0	0.0244559	0	0	0.0244559	0	0.0244559	0	0	0	0	0	0.00543463
810	Firmicutes	Clostridia_1	Clostridiales	Lachnospiraceae	Candidatus_Arthromitus	0.0244559	0	0	0	0.0244559	0	0	0.0489117	0	0	0	0	0	0	0	0	0	0	0.00543463
882	Actinobacteria	Actinobacteria	Micrococcales_2	Promicromonosporaceae	Promicromonospora	0	0.0244559	0	0	0	0	0.0244559	0	0	0	0.0489117	0	0	0	0	0	0	0	0.00543463
902	Bacteroidetes	Bacteroidia	Bacteroidales	Porphyromonadaceae_Cluster_V	Porphyromonadaceae_Cluster_V_unclassified	0	0	0	0.0244559	0	0	0	0	0	0	0.0244559	0	0	0	0	0	0.0489117	0	0.00543463
908	Firmicutes	Bacilli	Lactobacillales	Lactobacillales_unclassified	Lactobacillales_unclassified	0	0	0	0.0489117	0.0244559	0	0	0	0	0	0	0	0	0	0	0	0.0244559	0	0.00543463
909	Firmicutes	Bacilli	Lactobacillales	Lactobacillales_unclassified	Lactobacillales_unclassified	0	0.0244559	0	0.0244559	0.0244559	0	0	0	0	0	0	0	0	0.0244559	0	0	0	0	0.00543463
951	Firmicutes	Clostridia_1	Clostridiales	Ruminococcaceae	Ruminococcaceae_unclassified	0	0.0244559	0	0	0.0244559	0	0	0	0	0.0244559	0.0244559	0	0	0	0	0	0	0	0.00543463
955	Firmicutes	Clostridia_1	Clostridiales	Ruminococcaceae	Ruminococcaceae_unclassified	0	0	0	0.0244559	0	0	0	0	0	0	0.0489117	0	0	0	0	0	0.0244559	0	0.00543463
957	Firmicutes	Clostridia_1	Clostridiales	Ruminococcaceae	Ruminococcaceae_unclassified	0.0244559	0.0244559	0	0	0	0	0	0	0	0	0	0	0	0.0244559	0	0	0.0244559	0	0.00543463
963	Firmicutes	Clostridia_1	Clostridiales	Ruminococcaceae	Ruminococcaceae_unclassified	0.0244559	0.0244559	0	0	0	0	0	0	0	0	0	0	0	0.0244559	0	0	0.0244559	0	0.00543463
966	Firmicutes	Clostridia_1	Clostridiales	Ruminococcaceae	Termite_cockroach_cluster	0	0	0	0	0.0489117	0	0	0.0489117	0	0	0	0	0	0	0	0	0	0	0.00543463
1020	Tenericutes	Mollicutes	RF9	RF9_unclassified	RF9_unclassified	0	0.0244559	0	0	0	0	0.0244559	0	0	0	0.0244559	0	0	0	0	0	0.0244559	0	0.00543463
1023	Verrucomicrobia	Spartobacteria	Chthoniobacter	Chthoniobacter_unclassified	Chthoniobacter_unclassified	0	0.0244559	0	0	0	0	0	0	0	0.0489117	0	0	0.0244559	0	0	0	0	0	0.00543463
875	Acidobacteria	Acidobacteria	Acidobacteriales	Acidobacteriaceae	Uncultured_31	0	0.0244559	0	0	0	0	0.0244559	0	0	0	0	0	0.0244559	0.0244559	0	0	0	0	0.00543463
901	Bacteroidetes	Bacteroidia	Bacteroidales	Porphyromonadaceae_3	Tannerella	0.0244559	0	0	0	0	0	0	0	0	0	0.0733676	0	0	0	0	0	0	0	0.00543463
914	Firmicutes	Clostridia_1	Clostridiales	Clostridiales_unclassified	Clostridiales_unclassified	0	0	0	0	0.0489117	0	0	0	0	0	0	0	0.0244559	0.0244559	0	0	0	0	0.00543463
922	Firmicutes	Clostridia_1	Clostridiales	Lachnospiraceae	Gut_cluster_13	0	0	0	0	0	0	0.0244559	0	0	0	0	0.0244559	0.0244559	0	0	0	0.0244559	0	0.00543463
924	Firmicutes	Clostridia_1	Clostridiales	Lachnospiraceae	Gut_cluster_13	0	0	0	0	0	0	0	0	0	0	0.0244559	0	0.0244559	0.0244559	0	0	0.0244559	0	0.00543463
928	Firmicutes	Clostridia_1	Clostridiales	Lachnospiraceae	Gut_cluster_13	0	0	0	0	0	0	0	0.0244559	0	0	0	0.0244559	0.0244559	0.0244559	0	0	0	0	0.00543463
937	Firmicutes	Clostridia_1	Clostridiales	Lachnospiraceae	Lachnospiraceae_unclassified	0	0	0	0.0733676	0.0244559	0	0	0	0	0	0	0	0	0	0	0	0	0	0.00543463
964	Firmicutes	Clostridia_1	Clostridiales	Ruminococcaceae	Ruminococcaceae_unclassified	0.0244559	0.0244559	0	0.0244559	0	0	0	0	0	0.0244559	0	0	0	0	0	0	0	0	0.00543463
993	Planctomycetes	Planctomycetacia	Planctomycetales	Planctomycetaceae	Termite_cockroach_cluster_2	0.0733676	0	0	0	0	0	0	0	0	0	0.0244559	0	0	0	0	0	0	0	0.00543463
1007	Proteobacteria	Deltaproteobacteria	Desulfobacterales	Desulfobacteraceae	Desulfobacteraceae_unclassified	0.0489117	0	0	0.0244559	0	0	0	0	0	0	0	0	0	0	0	0	0.0244559	0	0.00543463
893	Bacteroidetes	Bacteroidia	Bacteroidales	Porphyromonadaceae_1	Dysgonomonas	0.0244559	0.0244559	0	0	0	0.0244559	0	0.0244559	0	0	0	0	0	0	0	0	0	0	0.00543463
943	Firmicutes	Clostridia_1	Clostridiales	Ruminococcaceae	Gut_cluster_4	0	0	0	0	0	0	0	0.0244559	0	0	0.0489117	0	0	0.0244559	0	0	0	0	0.00543463
983	Firmicutes	Firmicutes_unclassified	Firmicutes_unclassified	Firmicutes_unclassified	Firmicutes_unclassified	0	0	0	0	0	0	0	0	0	0	0.0733676	0	0	0	0.0244559	0	0	0	0.00543463
984	Firmicutes	Firmicutes_unclassified	Firmicutes_unclassified	Firmicutes_unclassified	Firmicutes_unclassified	0	0	0	0.0244559	0.0244559	0	0	0	0	0	0.0244559	0	0	0	0.0244559	0	0	0	0.00543463
996	Proteobacteria	Alphaproteobacteria	Alphaproteobacteria_unclassified	Alphaproteobacteria_unclassified	Alphaproteobacteria_unclassified	0.0244559	0	0	0.0244559	0	0	0	0.0244559	0	0	0	0	0	0	0.0244559	0	0	0	0.00543463
1024	unknown	unknown_unclassified	unknown_unclassified	unknown_unclassified	unknown_unclassified	0	0	0	0	0.0244559	0	0	0	0	0.0244559	0	0.0244559	0.0244559	0	0	0	0	0	0.00543463
900	Bacteroidetes	Bacteroidia	Bacteroidales	Porphyromonadaceae_3	Tannerella	0	0	0	0	0	0	0	0	0	0	0	0	0.0244559	0.0489117	0	0	0.0244559	0	0.00543463
944	Firmicutes	Clostridia_1	Clostridiales	Ruminococcaceae	Gut_cluster_7	0	0.0244559	0	0	0	0	0.0244559	0	0	0.0244559	0	0.0244559	0	0	0	0	0	0	0.00543463
960	Firmicutes	Clostridia_1	Clostridiales	Ruminococcaceae	Ruminococcaceae_unclassified	0	0	0	0	0	0	0	0	0	0.0489117	0	0	0.0244559	0	0	0	0.0244559	0	0.00543463
967	Firmicutes	Clostridia_1	Clostridiales	Ruminococcaceae	Termite_cockroach_cluster	0	0	0	0.0489117	0	0	0	0	0	0.0244559	0	0.0244559	0	0	0	0	0	0	0.00543463
971	Firmicutes	Clostridia_1	Clostridiales	Ruminococcaceae	Uncultured_28	0	0	0	0	0	0	0.0244559	0.0244559	0	0	0.0244559	0.0244559	0	0	0	0	0	0	0.00543463
972	Firmicutes	Clostridia_1	Clostridiales	Ruminococcaceae	Uncultured_28	0	0	0	0	0.0244559	0	0	0	0	0.0244559	0.0244559	0.0244559	0	0	0	0	0	0	0.00543463
1018	Proteobacteria	Gammaproteobacteria_1	Pseudomonadales	Pseudomonadaceae	Pseudomonas_1	0	0	0	0	0	0	0.0244559	0.0489117	0	0	0	0.0244559	0	0	0	0	0	0	0.00543463
985	Firmicutes	Firmicutes_unclassified	Firmicutes_unclassified	Firmicutes_unclassified	Firmicutes_unclassified	0	0.0244559	0	0	0	0	0	0	0	0.0244559	0	0	0	0.0244559	0.0244559	0	0	0	0.00543463
1010	Proteobacteria	Deltaproteobacteria	Desulfovibrionales	Desulfovibrionaceae	Gut_cluster_3	0	0	0	0	0	0	0.0244559	0	0	0	0.0733676	0	0	0	0	0	0	0	0.00543463
888	Bacteroidetes	Bacteroidia	Bacteroidales	Bacteroidales_unclassified	Bacteroidales_unclassified	0.0489117	0	0	0	0	0	0	0	0	0	0	0	0	0.0244559	0	0	0.0244559	0	0.00543463
894	Bacteroidetes	Bacteroidia	Bacteroidales	Porphyromonadaceae_2	Paludibacter	0	0	0	0	0	0.0244559	0	0.0244559	0	0	0	0	0	0	0	0	0.0489117	0	0.00543463
918	Firmicutes	Clostridia_1	Clostridiales	Lachnospiraceae	Candidatus_Arthromitus	0	0	0	0	0	0	0.0244559	0.0244559	0	0	0.0244559	0	0	0	0.0244559	0	0	0	0.00543463
919	Firmicutes	Clostridia_1	Clostridiales	Lachnospiraceae	Catabacter	0	0	0	0	0.0244559	0	0.0244559	0.0244559	0	0	0	0	0	0	0.0244559	0	0	0	0.00543463
938	Firmicutes	Clostridia_1	Clostridiales	Lachnospiraceae	Lachnospiraceae_unclassified	0	0	0	0.0244559	0	0.0244559	0	0.0244559	0	0	0.0244559	0	0	0	0	0	0	0	0.00543463
958	Firmicutes	Clostridia_1	Clostridiales	Ruminococcaceae	Ruminococcaceae_unclassified	0	0.0244559	0	0	0	0.0489117	0	0	0	0	0	0	0.0244559	0	0	0	0	0	0.00543463
961	Firmicutes	Clostridia_1	Clostridiales	Ruminococcaceae	Ruminococcaceae_unclassified	0	0	0	0	0.0733676	0	0.0244559	0	0	0	0	0	0	0	0	0	0	0	0.00543463
970	Firmicutes	Clostridia_1	Clostridiales	Ruminococcaceae	Termite_cockroach_cluster	0	0	0	0	0	0	0	0	0	0	0	0.0489117	0	0.0244559	0	0	0.0244559	0	0.00543463
975	Firmicutes	Clostridia_2	Clostridiales_1	Veillonellaceae	Uncultured_7	0	0	0	0	0	0	0	0	0	0	0	0	0.0244559	0.0244559	0.0489117	0	0	0	0.00543463
979	Firmicutes	Firmicutes_unclassified	Firmicutes_unclassified	Firmicutes_unclassified	Firmicutes_unclassified	0	0	0	0	0	0	0	0	0	0.0244559	0.0244559	0	0	0	0.0244559	0	0.0244559	0	0.00543463
989	Planctomycetes	Planctomycetacia	Planctomycetales	Planctomycetaceae	Singulisphaera	0.0244559	0	0	0.0244559	0	0	0	0	0	0.0244559	0	0.0244559	0	0	0	0	0	0	0.00543463
992	Planctomycetes	Planctomycetacia	Planctomycetales	Planctomycetaceae	Termite_cockroach_cluster_2	0.0244559	0.0244559	0	0	0	0.0244559	0	0	0	0	0	0	0	0	0.0244559	0	0	0	0.00543463
1012	Proteobacteria	Deltaproteobacteria	Desulfovibrionales	Desulfovibrionaceae	Gut_cluster_3	0	0	0	0.0244559	0	0.0244559	0	0.0244559	0	0	0.0244559	0	0	0	0	0	0	0	0.00543463
890	Bacteroidetes	Bacteroidia	Bacteroidales	Bacteroidales_unclassified	Bacteroidales_unclassified	0	0	0	0	0	0	0	0	0	0	0	0	0	0.0489117	0	0	0.0489117	0	0.00543463
1022	Verrucomicrobia	Spartobacteria	Chthoniobacter	Chthoniobacter_unclassified	Chthoniobacter_unclassified	0.0244559	0	0	0	0	0	0.0244559	0	0	0	0	0.0489117	0	0	0	0	0	0	0.00543463
492	Fusobacteria	Fusobacteria	Fusobacteriales	Leptotrichiaceae	Sneathia	0.0244559	0	0	0.0244559	0	0	0	0	0	0.0244559	0	0	0	0.0244559	0	0	0	0	0.00543463
886	Bacteroidetes	Bacteroidetes_unclassified	Bacteroidetes_unclassified	Bacteroidetes_unclassified	Bacteroidetes_unclassified	0	0	0	0	0	0	0.0244559	0	0	0	0	0.0733676	0	0	0	0	0	0	0.00543463
917	Firmicutes	Clostridia_1	Clostridiales	Family_XIII_Incertae_Sedis	Gut_cluster_4	0	0	0	0	0	0	0.0244559	0	0	0	0.0489117	0	0	0.0244559	0	0	0	0	0.00543463
942	Firmicutes	Clostridia_1	Clostridiales	Ruminococcaceae	Gut_cluster_4	0	0	0	0	0	0	0.0489117	0	0	0	0.0489117	0	0	0	0	0	0	0	0.00543463
899	Bacteroidetes	Bacteroidia	Bacteroidales	Porphyromonadaceae_3	Porphyromonadaceae_3_unclassified	0.0489117	0	0	0	0	0	0	0	0	0	0	0	0	0.0489117	0	0	0	0	0.00543463
948	Firmicutes	Clostridia_1	Clostridiales	Ruminococcaceae	Insect_cluster	0	0	0	0	0	0.0244559	0	0.0244559	0	0	0.0244559	0	0	0.0244559	0	0	0	0	0.00543463
877	Actinobacteria	Actinobacteria	Actinobacteria_unclassified	Actinobacteria_unclassified	Actinobacteria_unclassified	0	0	0	0	0	0.0244559	0	0	0	0.0244559	0	0	0.0244559	0	0.0244559	0	0	0	0.00543463
936	Firmicutes	Clostridia_1	Clostridiales	Lachnospiraceae	Lachnospiraceae_unclassified	0	0	0	0	0	0.0244559	0	0	0	0	0	0	0.0244559	0.0244559	0.0244559	0	0	0	0.00543463
980	Firmicutes	Firmicutes_unclassified	Firmicutes_unclassified	Firmicutes_unclassified	Firmicutes_unclassified	0	0	0	0	0	0	0.0244559	0	0	0	0	0.0489117	0	0.0244559	0	0	0	0	0.00543463
973	Firmicutes	Clostridia_2	Clostridiales	Syntrophomonadaceae	Syntrophomonadaceae_unclassified	0	0	0	0	0	0.0244559	0.0244559	0	0	0	0.0244559	0.0244559	0	0	0	0	0	0	0.00543463
879	Actinobacteria	Actinobacteria	Coriobacteriales	Coriobacteriaceae	Uncultured_10	0	0	0	0	0	0.0244559	0	0	0	0	0	0.0244559	0	0.0244559	0.0244559	0	0	0	0.00543463
874	Acidobacteria	Acidobacteria	Acidobacteriales	Acidobacteriaceae	Uncultured_31	0	0	0	0	0	0	0	0	0	0.0489117	0	0	0	0.0489117	0	0	0	0	0.00543463
965	Firmicutes	Clostridia_1	Clostridiales	Ruminococcaceae	Termite_cockroach_cluster	0	0	0	0	0	0.0244559	0.0244559	0	0	0.0244559	0.0244559	0	0	0	0	0	0	0	0.00543463
1004	Proteobacteria	Alphaproteobacteria	Rickettsiales	Mitochondria	Mitochondria	0	0	0	0	0	0.0244559	0.0244559	0	0	0.0244559	0	0.0244559	0	0	0	0	0	0	0.00543463
892	Bacteroidetes	Bacteroidia	Bacteroidales	Bacteroidales_unclassified	Bacteroidales_unclassified	0	0	0	0.0244559	0	0.0733676	0	0	0	0	0	0	0	0	0	0	0	0	0.00543463
1264	Verrucomicrobia	Opitutae	Opitutae_unclassified	Opitutae_unclassified	Opitutae_unclassified	0	0	0.0366838	0	0	0	0	0.0244559	0.0366838	0	0	0	0	0	0	0	0	0	0.00543463
1027	Actinobacteria	Actinobacteria	Actinomycetales	Actinomycetales_unclassified	Actinomycetales_unclassified	0	0	0.0733676	0	0	0	0	0	0	0	0.0244559	0	0	0	0	0	0	0	0.00543463
1046	Bacteroidetes	Bacteroidia	Bacteroidales	Bacteroidaceae	Bacteroides	0	0	0.0366838	0	0	0	0	0	0	0	0	0	0	0	0	0.0366838	0.0244559	0	0.00543463
1049	Bacteroidetes	Bacteroidia	Bacteroidales	Bacteroidales_unclassified	Bacteroidales_unclassified	0	0	0	0	0	0	0	0	0	0	0	0	0	0	0	0.0733676	0.0244559	0	0.00543463
1101	Firmicutes	Bacilli	Lactobacillales	Lactobacillales_unclassified	Lactobacillales_unclassified	0.0244559	0	0	0	0	0	0	0	0.0366838	0	0	0	0	0	0	0.0366838	0	0	0.00543463
1105	Firmicutes	Bacilli	Lactobacillales	Streptococcaceae	Lactococcus_1	0	0	0	0.0244559	0	0	0	0	0	0	0	0	0	0	0	0.0733676	0	0	0.00543463
1155	Firmicutes	Clostridia_1	Clostridiales	Ruminococcaceae	Gut_cluster_7	0	0	0	0	0	0	0	0	0.0366838	0	0	0	0	0	0	0	0.0244559	0.0366838	0.00543463
1161	Firmicutes	Clostridia_1	Clostridiales	Ruminococcaceae	Ruminococcaceae_unclassified	0	0	0	0	0	0	0	0	0.0366838	0	0	0	0	0	0	0	0.0244559	0.0366838	0.00543463
1204	Firmicutes	Firmicutes_unclassified	Firmicutes_unclassified	Firmicutes_unclassified	Firmicutes_unclassified	0	0	0.0733676	0.0244559	0	0	0	0	0	0	0	0	0	0	0	0	0	0	0.00543463
1219	Planctomycetes	Planctomycetacia	Planctomycetales	Planctomycetaceae	Planctomycetaceae_unclassified	0	0	0.0366838	0	0.0244559	0	0	0	0.0366838	0	0	0	0	0	0	0	0	0	0.00543463
1256	Proteobacteria	Gammaproteobacteria_2	Legionellales	Coxiellaceae	Aquicella	0	0	0	0	0	0	0	0	0	0	0	0.0244559	0	0	0	0	0	0.0733676	0.00543463
1093	Elusimicrobia	Elusimicrobia	Endomicrobiales	Endomicrobiaceae	Endomicrobium	0	0	0	0	0	0	0	0	0	0	0	0	0	0.0244559	0	0.0366838	0	0.0366838	0.00543463
1109	Firmicutes	Clostridia_1	Clostridiales	Clostridiales_unclassified	Clostridiales_unclassified	0	0	0.0733676	0	0	0	0	0	0	0	0	0	0	0.0244559	0	0	0	0	0.00543463
1234	Proteobacteria	Betaproteobacteria	Betaproteobacteria_unclassified	Betaproteobacteria_unclassified	Betaproteobacteria_unclassified	0	0	0	0	0	0	0	0	0	0.0244559	0	0	0	0	0	0	0	0.0733676	0.00543463
1188	Firmicutes	Clostridia_1	Clostridiales	Ruminococcaceae	Termite_cockroach_cluster	0	0	0	0	0	0	0.0244559	0	0	0	0	0	0	0	0	0	0	0.0733676	0.00543463
1197	Firmicutes	Clostridia_2	Clostridiales_1	Peptococcaceae_1	Peptococcaceae_1_unclassified	0	0	0	0	0	0	0.0244559	0	0.0366838	0	0	0	0	0	0	0	0	0.0366838	0.00543463
1259	Synergistetes	Synergistia	Synergistales	Synergistaceae	Candidatus_Tammella	0	0	0	0	0	0	0.0244559	0	0	0	0	0	0	0	0	0	0	0.0733676	0.00543463
1034	Actinobacteria	Actinobacteria	Micrococcales_1	Micrococcaceae	Arthrobacter_17	0	0.0489117	0	0	0	0	0	0	0	0	0	0	0	0	0	0.0366838	0	0	0.00475531
1198	Firmicutes	Clostridia_2	Clostridiales_1	Peptococcaceae_1	Uncultured_2	0	0.0244559	0.0366838	0	0	0	0	0	0	0	0	0	0	0	0	0	0.0244559	0	0.00475531
1268	unknown	unknown_unclassified	unknown_unclassified	unknown_unclassified	unknown_unclassified	0	0.0244559	0	0	0	0	0	0.0244559	0	0	0	0	0	0	0	0.0366838	0	0	0.00475531
1147	Firmicutes	Clostridia_1	Clostridiales	Lachnospiraceae	Lachnospiraceae_unclassified	0	0.0244559	0	0	0	0	0	0	0	0	0.0244559	0	0	0	0	0.0366838	0	0	0.00475531
1171	Firmicutes	Clostridia_1	Clostridiales	Ruminococcaceae	Ruminococcaceae_unclassified	0	0.0244559	0	0	0	0	0	0	0	0	0.0244559	0	0	0	0	0.0366838	0	0	0.00475531
1045	Bacteroidetes	Bacteroidetes_unclassified	Bacteroidetes_unclassified	Bacteroidetes_unclassified	Bacteroidetes_unclassified	0	0	0.0366838	0	0	0	0	0	0	0	0	0	0.0244559	0	0	0	0.0244559	0	0.00475531
1077	Bacteroidetes	Bacteroidia	Bacteroidales	Porphyromonadaceae_Gut_group	Termite_cluster_I	0	0.0244559	0	0	0	0	0	0	0.0366838	0	0	0.0244559	0	0	0	0	0	0	0.00475531
1095	Firmicutes	Bacilli	Bacillales	Paenibacillaceae_2	Paenibacillus_1	0	0	0	0	0	0	0	0	0	0	0.0244559	0	0.0244559	0	0	0	0	0.0366838	0.00475531
1100	Firmicutes	Bacilli	Lactobacillales	Lactobacillales_unclassified	Lactobacillales_unclassified	0	0	0	0	0	0	0	0.0244559	0.0366838	0	0	0	0.0244559	0	0	0	0	0	0.00475531
1106	Firmicutes	Bacilli	Lactobacillales	Streptococcaceae	Lactococcus_2	0	0	0	0	0	0	0	0	0	0	0.0244559	0	0.0244559	0	0	0.0366838	0	0	0.00475531
1177	Firmicutes	Clostridia_1	Clostridiales	Ruminococcaceae	Ruminococcaceae_unclassified	0	0	0.0366838	0	0	0	0	0	0	0	0.0244559	0	0.0244559	0	0	0	0	0	0.00475531
1251	Proteobacteria	Deltaproteobacteria	Rs-K70	Insect_cluster	Insect_cluster_unclassified	0.0244559	0.0244559	0	0	0	0	0	0	0	0	0	0	0	0	0	0	0	0.0366838	0.00475531
930	Firmicutes	Clostridia_1	Clostridiales	Lachnospiraceae	Gut_cluster_13	0	0.0244559	0	0	0	0	0	0	0	0.0244559	0	0	0	0	0	0.0366838	0	0	0.00475531
1053	Bacteroidetes	Bacteroidia	Bacteroidales	Bacteroidales_unclassified	Bacteroidales_unclassified	0	0.0244559	0	0	0	0	0	0	0	0	0	0	0	0	0.0244559	0.0366838	0	0	0.00475531
1121	Firmicutes	Clostridia_1	Clostridiales	Lachnospiraceae	Gut_cluster_13	0	0	0.0366838	0.0244559	0	0	0	0	0	0	0	0	0.0244559	0	0	0	0	0	0.00475531
1164	Firmicutes	Clostridia_1	Clostridiales	Ruminococcaceae	Ruminococcaceae_unclassified	0	0	0	0.0244559	0	0	0	0	0.0366838	0	0	0	0.0244559	0	0	0	0	0	0.00475531
1184	Firmicutes	Clostridia_1	Clostridiales	Ruminococcaceae	Ruminococcaceae_unclassified	0	0.0244559	0	0	0	0	0	0	0.0366838	0	0	0	0	0.0244559	0	0	0	0	0.00475531
1190	Firmicutes	Clostridia_1	Clostridiales	Ruminococcaceae	Termite_cockroach_cluster	0	0.0244559	0	0	0	0	0	0	0	0	0	0	0	0.0244559	0	0	0	0.0366838	0.00475531
1226	Planctomycetes	Planctomycetacia	Planctomycetales	Planctomycetaceae	Termite_cockroach_cluster_2	0	0	0	0	0	0	0	0.0489117	0	0	0	0	0	0	0	0	0	0.0366838	0.00475531
1238	Proteobacteria	Deltaproteobacteria	Desulfarculales	Desulfarculaceae	Desulfarculus	0	0	0	0	0	0	0	0.0244559	0.0366838	0	0	0	0	0	0	0	0.0244559	0	0.00475531
1243	Proteobacteria	Deltaproteobacteria	Desulfovibrionales	Desulfovibrionaceae	Gut_cluster_3	0.0244559	0	0	0	0	0	0	0	0.0366838	0	0	0	0.0244559	0	0	0	0	0	0.00475531
1244	Proteobacteria	Deltaproteobacteria	Desulfovibrionales	Desulfovibrionaceae	Gut_cluster_3	0	0	0	0	0.0244559	0	0	0	0.0366838	0	0	0	0.0244559	0	0	0	0	0	0.00475531
1265	Verrucomicrobia	Opitutae	Opitutales	Opitutaceae	Opitutus	0	0	0.0366838	0	0.0244559	0	0	0	0	0	0	0	0.0244559	0	0	0	0	0	0.00475531
1036	Actinobacteria	Actinobacteria	Micrococcales_4	Intrasporangiaceae_1	Physiococcus	0	0	0.0366838	0	0	0	0	0	0	0	0.0244559	0	0	0	0	0	0.0244559	0	0.00475531
1054	Bacteroidetes	Bacteroidia	Bacteroidales	Bacteroidales_unclassified	Bacteroidales_unclassified	0	0	0.0366838	0.0244559	0	0	0	0.0244559	0	0	0	0	0	0	0	0	0	0	0.00475531
1082	Bacteroidetes	Bacteroidia	Bacteroidales	Rikenellaceae	Alisitpes_IV	0	0.0244559	0	0	0	0	0.0244559	0	0.0366838	0	0	0	0	0	0	0	0	0	0.00475531
1112	Firmicutes	Clostridia_1	Clostridiales	Clostridiales_unclassified	Clostridiales_unclassified	0	0	0.0366838	0	0	0	0	0	0	0	0.0489117	0	0	0	0	0	0	0	0.00475531
1113	Firmicutes	Clostridia_1	Clostridiales	Family_XIII_Incertae_Sedis	Family_XIII_Incertae_Sedis_unclassified	0	0	0	0	0	0	0	0	0.0366838	0	0	0	0.0244559	0	0.0244559	0	0	0	0.00475531
1149	Firmicutes	Clostridia_1	Clostridiales	Ruminococcaceae	Gut_cluster_1	0	0	0	0	0	0	0	0	0	0	0	0	0.0244559	0	0.0244559	0.0366838	0	0	0.00475531
1199	Firmicutes	Clostridia_2	Clostridiales_1	Peptococcaceae_1	Uncultured_2	0	0	0	0	0	0	0	0	0	0	0	0	0.0244559	0	0.0244559	0.0366838	0	0	0.00475531
1035	Actinobacteria	Actinobacteria	Micrococcales_3	Microbacteriaceae	Microbacteriaceae_unclassified	0	0	0	0.0244559	0.0244559	0	0	0	0	0	0	0	0	0	0	0.0366838	0	0	0.00475531
1039	Actinobacteria	Actinobacteria	Solirubrobacterales	Solirubrobacterales_unclassified	Solirubrobacterales_unclassified	0	0	0	0	0.0244559	0	0	0	0.0366838	0	0	0.0244559	0	0	0	0	0	0	0.00475531
1080	Bacteroidetes	Bacteroidia	Bacteroidales	Rikenellaceae	Alisitpes_IV	0.0244559	0	0	0	0	0	0	0.0244559	0	0	0	0	0	0	0	0	0	0.0366838	0.00475531
1108	Firmicutes	Clostridia_1	Clostridiales	Clostridiales_unclassified	Clostridiales_unclassified	0	0	0	0	0	0	0	0	0.0366838	0	0	0	0.0244559	0.0244559	0	0	0	0	0.00475531
1194	Firmicutes	Clostridia_1	Clostridiales	Ruminococcaceae	Uncultured_28	0.0244559	0	0	0	0	0	0	0	0	0	0.0244559	0	0	0	0	0	0	0.0366838	0.00475531
1241	Proteobacteria	Deltaproteobacteria	Desulfovibrionales	Desulfovibrionaceae	Gut_cluster_3	0	0	0.0366838	0	0	0	0	0	0	0.0244559	0	0	0.0244559	0	0	0	0	0	0.00475531
1246	Proteobacteria	Deltaproteobacteria	Desulfovibrionales	Desulfovibrionaceae	Gut_cluster_3	0	0	0	0	0	0	0	0.0244559	0.0366838	0	0	0.0244559	0	0	0	0	0	0	0.00475531
1066	Bacteroidetes	Bacteroidia	Bacteroidales	Porphyromonadaceae_2	Porphyromonadaceae_2_unclassified	0	0	0	0	0	0	0	0.0244559	0	0	0	0	0	0	0.0244559	0.0366838	0	0	0.00475531
1081	Bacteroidetes	Bacteroidia	Bacteroidales	Rikenellaceae	Alisitpes_IV	0.0489117	0	0	0	0	0	0	0	0	0	0	0	0	0	0	0	0	0.0366838	0.00475531
1097	Firmicutes	Bacilli	Bacilli_unclassified	Bacilli_unclassified	Bacilli_unclassified	0	0	0	0	0	0	0	0.0244559	0	0	0	0	0	0	0.0244559	0.0366838	0	0	0.00475531
1107	Firmicutes	Clostridia_1	Clostridiales	Clostridiales_unclassified	Clostridiales_unclassified	0	0	0	0	0	0	0	0.0244559	0.0366838	0	0	0	0	0	0.0244559	0	0	0	0.00475531
1156	Firmicutes	Clostridia_1	Clostridiales	Ruminococcaceae	Insect_cluster	0	0	0	0	0	0	0.0244559	0	0	0	0	0	0.0244559	0	0	0	0	0.0366838	0.00475531
1216	Planctomycetes	Planctomycetacia	Planctomycetales	Planctomycetaceae	Planctomyces_1	0	0	0.0366838	0	0	0	0.0244559	0	0	0	0	0	0.0244559	0	0	0	0	0	0.00475531
1221	Planctomycetes	Planctomycetacia	Planctomycetales	Planctomycetaceae	Planctomycetaceae_unclassified	0	0	0.0366838	0	0	0	0	0	0	0	0	0.0489117	0	0	0	0	0	0	0.00475531
1233	Proteobacteria	Betaproteobacteria	Betaproteobacteria_unclassified	Betaproteobacteria_unclassified	Betaproteobacteria_unclassified	0.0489117	0	0	0	0	0	0	0	0	0	0	0	0	0	0	0.0366838	0	0	0.00475531
1025	Actinobacteria	Actinobacteria	Actinobacteria_unclassified	Actinobacteria_unclassified	Actinobacteria_unclassified	0	0	0.0366838	0	0.0244559	0	0	0	0	0	0	0	0	0	0.0244559	0	0	0	0.00475531
1052	Bacteroidetes	Bacteroidia	Bacteroidales	Bacteroidales_unclassified	Bacteroidales_unclassified	0	0	0	0	0	0	0	0	0.0366838	0	0	0	0	0.0244559	0	0	0.0244559	0	0.00475531
1074	Bacteroidetes	Bacteroidia	Bacteroidales	Porphyromonadaceae_Cluster_V	Cockroach_cluster	0	0	0.0366838	0	0	0	0	0	0	0	0	0	0	0.0244559	0	0	0.0244559	0	0.00475531
1091	Chloroflexi	Thermomicrobia	JG30-KF-CM45	JG30-KF-CM45_unclassified	JG30-KF-CM45_unclassified	0	0	0	0	0	0	0	0	0	0	0.0244559	0	0	0.0244559	0	0	0	0.0366838	0.00475531
1151	Firmicutes	Clostridia_1	Clostridiales	Ruminococcaceae	Gut_cluster_4	0	0	0	0	0	0	0	0	0	0	0.0244559	0	0	0.0244559	0	0	0	0.0366838	0.00475531
1230	Proteobacteria	Alphaproteobacteria	Alphaproteobacteria_unclassified	Alphaproteobacteria_unclassified	Alphaproteobacteria_unclassified	0	0	0	0	0	0	0	0	0.0366838	0.0244559	0.0244559	0	0	0	0	0	0	0	0.00475531
1090	Bacteroidetes	Sphingobacteria	Sphingobacteriales_1	SB_1	SB_1_unclassified	0	0	0	0	0.0244559	0	0	0	0	0	0	0	0	0.0244559	0	0.0366838	0	0	0.00475531
1111	Firmicutes	Clostridia_1	Clostridiales	Clostridiales_unclassified	Clostridiales_unclassified	0	0	0	0	0.0244559	0	0	0	0	0.0244559	0	0	0	0	0	0	0	0.0366838	0.00475531
1127	Firmicutes	Clostridia_1	Clostridiales	Lachnospiraceae	Gut_cluster_13	0	0	0	0	0	0	0.0244559	0.0244559	0	0	0	0	0	0	0	0.0366838	0	0	0.00475531
1144	Firmicutes	Clostridia_1	Clostridiales	Lachnospiraceae	Lachnospiraceae_unclassified	0	0	0	0.0244559	0	0	0	0	0	0	0	0	0	0.0244559	0	0	0	0.0366838	0.00475531
1041	Bacteroidetes	Bacteroidetes_unclassified	Bacteroidetes_unclassified	Bacteroidetes_unclassified	Bacteroidetes_unclassified	0	0	0.0366838	0	0	0	0	0	0	0	0	0	0	0	0.0489117	0	0	0	0.00475531
1195	Firmicutes	Clostridia_2	Clostridiales	Syntrophomonadaceae	Pelospora	0.0244559	0	0	0	0	0	0	0	0	0	0	0	0	0.0244559	0	0.0366838	0	0	0.00475531
1214	Firmicutes	Firmicutes_unclassified	Firmicutes_unclassified	Firmicutes_unclassified	Firmicutes_unclassified	0.0244559	0	0	0	0	0	0	0	0	0	0	0	0	0.0244559	0	0	0	0.0366838	0.00475531
1262	Tenericutes	Mollicutes	RF9	RF9_unclassified	RF9_unclassified	0.0244559	0	0.0366838	0	0	0	0	0	0	0	0	0	0	0.0244559	0	0	0	0	0.00475531
1191	Firmicutes	Clostridia_1	Clostridiales	Ruminococcaceae	Termite_cockroach_cluster	0	0	0	0	0	0	0	0	0	0.0244559	0	0	0	0	0.0244559	0.0366838	0	0	0.00475531
1030	Actinobacteria	Actinobacteria	Coriobacteriales	Coriobacteriaceae	Uncultured_10	0	0	0.0366838	0	0	0.0244559	0	0	0	0	0	0.0244559	0	0	0	0	0	0	0.00475531
1031	Actinobacteria	Actinobacteria	Corynebacteriales	Mycobacteriaceae	Mycobacterium	0	0	0.0366838	0	0	0.0244559	0	0	0	0	0	0.0244559	0	0	0	0	0	0	0.00475531
1069	Bacteroidetes	Bacteroidia	Bacteroidales	Porphyromonadaceae_3	Porphyromonadaceae_3_unclassified	0	0	0	0	0	0	0.0244559	0	0.0366838	0	0	0	0	0	0.0244559	0	0	0	0.00475531
1096	Firmicutes	Bacilli	Bacilli_unclassified	Bacilli_unclassified	Bacilli_unclassified	0	0	0.0366838	0	0	0	0.0244559	0	0	0.0244559	0	0	0	0	0	0	0	0	0.00475531
1167	Firmicutes	Clostridia_1	Clostridiales	Ruminococcaceae	Ruminococcaceae_unclassified	0	0	0	0	0	0.0244559	0	0	0	0	0	0.0244559	0	0	0	0	0	0.0366838	0.00475531
1168	Firmicutes	Clostridia_1	Clostridiales	Ruminococcaceae	Ruminococcaceae_unclassified	0	0	0.0366838	0	0	0	0.0244559	0	0	0	0	0	0	0	0.0244559	0	0	0	0.00475531
1205	Firmicutes	Firmicutes_unclassified	Firmicutes_unclassified	Firmicutes_unclassified	Firmicutes_unclassified	0	0	0	0	0	0.0244559	0	0	0	0	0	0	0	0	0	0.0366838	0.0244559	0	0.00475531
1050	Bacteroidetes	Bacteroidia	Bacteroidales	Bacteroidales_unclassified	Bacteroidales_unclassified	0	0.0489117	0	0	0.0244559	0	0	0	0	0	0	0	0	0	0	0	0	0	0.00407598
1075	Bacteroidetes	Bacteroidia	Bacteroidales	Porphyromonadaceae_Cluster_V	Porphyromonadaceae_Cluster_V_unclassified	0	0.0489117	0	0	0	0	0	0	0	0	0	0	0	0	0	0	0.0244559	0	0.00407598
1118	Firmicutes	Clostridia_1	Clostridiales	Lachnospiraceae	Gut_cluster_13	0	0.0489117	0	0	0	0	0	0	0	0	0.0244559	0	0	0	0	0	0	0	0.00407598
1158	Firmicutes	Clostridia_1	Clostridiales	Ruminococcaceae	Ruminococcaceae_unclassified	0	0.0489117	0	0	0.0244559	0	0	0	0	0	0	0	0	0	0	0	0	0	0.00407598
1071	Bacteroidetes	Bacteroidia	Bacteroidales	Porphyromonadaceae_3	Porphyromonadaceae_3_unclassified	0	0.0489117	0	0	0	0	0	0	0	0	0	0.0244559	0	0	0	0	0	0	0.00407598
1176	Firmicutes	Clostridia_1	Clostridiales	Ruminococcaceae	Ruminococcaceae_unclassified	0	0.0489117	0	0	0	0	0	0	0	0	0	0.0244559	0	0	0	0	0	0	0.00407598
1058	Bacteroidetes	Bacteroidia	Bacteroidales	Bacteroidales_unclassified	Bacteroidales_unclassified	0	0.0244559	0	0	0.0244559	0	0	0	0	0	0	0	0.0244559	0	0	0	0	0	0.00407598
1028	Actinobacteria	Actinobacteria	Actinomycetales	Actinomycetales_unclassified	Actinomycetales_unclassified	0	0.0244559	0	0	0	0	0	0.0489117	0	0	0	0	0	0	0	0	0	0	0.00407598
1242	Proteobacteria	Deltaproteobacteria	Desulfovibrionales	Desulfovibrionaceae	Gut_cluster_3	0.0244559	0.0244559	0	0	0	0	0	0	0	0	0	0	0.0244559	0	0	0	0	0	0.00407598
1051	Bacteroidetes	Bacteroidia	Bacteroidales	Bacteroidales_unclassified	Bacteroidales_unclassified	0	0.0489117	0	0	0	0	0	0	0	0.0244559	0	0	0	0	0	0	0	0	0.00407598
1056	Bacteroidetes	Bacteroidia	Bacteroidales	Bacteroidales_unclassified	Bacteroidales_unclassified	0	0.0244559	0	0.0244559	0	0	0	0.0244559	0	0	0	0	0	0	0	0	0	0	0.00407598
1073	Bacteroidetes	Bacteroidia	Bacteroidales	Porphyromonadaceae_3	Porphyromonadaceae_3_unclassified	0	0.0244559	0	0	0	0	0	0	0	0	0.0244559	0	0	0	0	0	0.0244559	0	0.00407598
1115	Firmicutes	Clostridia_1	Clostridiales	Family_XIII_Incertae_Sedis	Family_XIII_Incertae_Sedis_unclassified	0	0.0244559	0	0.0244559	0	0	0	0	0	0	0.0244559	0	0	0	0	0	0	0	0.00407598
1153	Firmicutes	Clostridia_1	Clostridiales	Ruminococcaceae	Gut_cluster_7	0	0	0	0	0	0	0	0	0	0	0	0	0.0489117	0	0	0	0.0244559	0	0.00407598
1160	Firmicutes	Clostridia_1	Clostridiales	Ruminococcaceae	Ruminococcaceae_unclassified	0	0	0	0.0244559	0	0	0	0	0	0	0	0	0.0489117	0	0	0	0	0	0.00407598
1141	Firmicutes	Clostridia_1	Clostridiales	Lachnospiraceae	Lachnospiraceae_unclassified	0	0.0244559	0	0	0.0489117	0	0	0	0	0	0	0	0	0	0	0	0	0	0.00407598
1042	Bacteroidetes	Bacteroidetes_unclassified	Bacteroidetes_unclassified	Bacteroidetes_unclassified	Bacteroidetes_unclassified	0	0.0244559	0	0	0	0	0	0.0244559	0	0	0	0	0	0	0.0244559	0	0	0	0.00407598
1061	Bacteroidetes	Bacteroidia	Bacteroidales	Bacteroidales_unclassified	Bacteroidales_unclassified	0.0244559	0.0244559	0	0	0	0	0	0	0	0	0	0	0	0	0	0	0.0244559	0	0.00407598
1063	Bacteroidetes	Bacteroidia	Bacteroidales	Porphyromonadaceae_1	Dysgonomonas	0	0.0244559	0	0	0.0244559	0	0	0	0	0	0	0.0244559	0	0	0	0	0	0	0.00407598
1116	Firmicutes	Clostridia_1	Clostridiales	Family_XIII_Incertae_Sedis	Gut_cluster_4	0	0.0244559	0	0	0.0244559	0	0	0	0	0	0	0.0244559	0	0	0	0	0	0	0.00407598
1125	Firmicutes	Clostridia_1	Clostridiales	Lachnospiraceae	Gut_cluster_13	0.0489117	0.0244559	0	0	0	0	0	0	0	0	0	0	0	0	0	0	0	0	0.00407598
1139	Firmicutes	Clostridia_1	Clostridiales	Lachnospiraceae	Lachnospiraceae_unclassified	0	0	0	0	0	0	0	0.0244559	0	0	0	0.0244559	0.0244559	0	0	0	0	0	0.00407598
1146	Firmicutes	Clostridia_1	Clostridiales	Lachnospiraceae	Lachnospiraceae_unclassified	0	0	0	0	0	0	0	0	0	0	0.0489117	0	0.0244559	0	0	0	0	0	0.00407598
1175	Firmicutes	Clostridia_1	Clostridiales	Ruminococcaceae	Ruminococcaceae_unclassified	0	0	0	0	0.0244559	0	0	0	0	0	0.0244559	0	0.0244559	0	0	0	0	0	0.00407598
1180	Firmicutes	Clostridia_1	Clostridiales	Ruminococcaceae	Ruminococcaceae_unclassified	0.0489117	0.0244559	0	0	0	0	0	0	0	0	0	0	0	0	0	0	0	0	0.00407598
1215	Firmicutes	Firmicutes_unclassified	Firmicutes_unclassified	Firmicutes_unclassified	Firmicutes_unclassified	0.0244559	0.0244559	0	0.0244559	0	0	0	0	0	0	0	0	0	0	0	0	0	0	0.00407598
1229	Proteobacteria	Alphaproteobacteria	Alphaproteobacteria_unclassified	Alphaproteobacteria_unclassified	Alphaproteobacteria_unclassified	0.0489117	0.0244559	0	0	0	0	0	0	0	0	0	0	0	0	0	0	0	0	0.00407598
1098	Firmicutes	Bacilli	Bacilli_unclassified	Bacilli_unclassified	Bacilli_unclassified	0	0	0	0	0	0	0	0.0733676	0	0	0	0	0	0	0	0	0	0	0.00407598
1145	Firmicutes	Clostridia_1	Clostridiales	Lachnospiraceae	Lachnospiraceae_unclassified	0	0.0244559	0	0	0.0244559	0	0	0	0	0	0	0	0	0	0.0244559	0	0	0	0.00407598
1154	Firmicutes	Clostridia_1	Clostridiales	Ruminococcaceae	Gut_cluster_7	0	0	0	0	0	0	0	0.0733676	0	0	0	0	0	0	0	0	0	0	0.00407598
1217	Planctomycetes	Planctomycetacia	Planctomycetales	Planctomycetaceae	Planctomycetaceae_unclassified	0	0	0	0	0.0244559	0	0	0	0	0	0	0.0244559	0.0244559	0	0	0	0	0	0.00407598
935	Firmicutes	Clostridia_1	Clostridiales	Lachnospiraceae	Lachnospiraceae_unclassified	0	0	0	0.0489117	0	0	0	0	0	0	0	0	0	0	0	0	0.0244559	0	0.00407598
1029	Actinobacteria	Actinobacteria	AKIW543	AKIW543_unclassified	AKIW543_unclassified	0	0.0244559	0	0	0	0	0.0244559	0	0	0	0	0	0	0	0	0	0.0244559	0	0.00407598
1043	Bacteroidetes	Bacteroidetes_unclassified	Bacteroidetes_unclassified	Bacteroidetes_unclassified	Bacteroidetes_unclassified	0	0	0	0	0	0	0	0	0	0	0.0489117	0	0	0	0	0	0.0244559	0	0.00407598
1060	Bacteroidetes	Bacteroidia	Bacteroidales	Bacteroidales_unclassified	Bacteroidales_unclassified	0	0.0244559	0	0	0.0244559	0	0	0	0	0.0244559	0	0	0	0	0	0	0	0	0.00407598
1084	Bacteroidetes	Bacteroidia	Bacteroidales	Rikenellaceae	Alistipes_III	0	0	0	0.0244559	0	0	0	0	0	0	0	0	0	0	0	0	0.0489117	0	0.00407598
1086	Bacteroidetes	Bacteroidia	Bacteroidales	Rikenellaceae	Rikenellaceae_unclassified	0	0	0	0	0	0	0	0.0244559	0	0	0	0	0.0244559	0	0.0244559	0	0	0	0.00407598
1088	Bacteroidetes	Bacteroidia	Bacteroidales	Rikenellaceae	Rikenellaceae_unclassified	0	0	0	0	0.0244559	0	0	0	0	0	0.0489117	0	0	0	0	0	0	0	0.00407598
1117	Firmicutes	Clostridia_1	Clostridiales	Lachnospiraceae	Candidatus_Arthromitus	0	0.0244559	0	0.0244559	0	0	0.0244559	0	0	0	0	0	0	0	0	0	0	0	0.00407598
1159	Firmicutes	Clostridia_1	Clostridiales	Ruminococcaceae	Ruminococcaceae_unclassified	0	0	0	0.0244559	0.0244559	0	0	0	0	0	0	0	0	0	0	0	0.0244559	0	0.00407598
1170	Firmicutes	Clostridia_1	Clostridiales	Ruminococcaceae	Ruminococcaceae_unclassified	0	0.0244559	0	0	0.0244559	0	0	0	0	0.0244559	0	0	0	0	0	0	0	0	0.00407598
1187	Firmicutes	Clostridia_1	Clostridiales	Ruminococcaceae	Termite_cockroach_cluster	0	0.0244559	0	0	0	0	0.0244559	0.0244559	0	0	0	0	0	0	0	0	0	0	0.00407598
1196	Firmicutes	Clostridia_2	Clostridiales	Syntrophomonadaceae	Syntrophomonadaceae_unclassified	0	0.0244559	0	0	0	0	0.0244559	0	0	0	0	0	0	0	0	0	0.0244559	0	0.00407598
1207	Firmicutes	Firmicutes_unclassified	Firmicutes_unclassified	Firmicutes_unclassified	Firmicutes_unclassified	0	0	0	0	0	0	0	0.0244559	0	0.0244559	0	0	0.0244559	0	0	0	0	0	0.00407598
1240	Proteobacteria	Deltaproteobacteria	Desulfovibrionales	Desulfovibrionaceae	Gut_cluster_3	0.0244559	0.0244559	0	0	0	0	0	0	0	0.0244559	0	0	0	0	0	0	0	0	0.00407598
1245	Proteobacteria	Deltaproteobacteria	Desulfovibrionales	Desulfovibrionaceae	Gut_cluster_3	0	0	0	0	0	0	0	0.0489117	0	0	0	0.0244559	0	0	0	0	0	0	0.00407598
1250	Proteobacteria	Deltaproteobacteria	Myxococcales	Uncultured_3	Uncultured_3_unclassified	0	0	0	0.0244559	0	0	0	0	0	0	0	0	0.0244559	0	0.0244559	0	0	0	0.00407598
1252	Proteobacteria	Deltaproteobacteria	Rs-K70	Rs-K70_unclassified	Rs-K70_unclassified	0	0	0	0.0244559	0.0244559	0	0	0	0	0	0.0244559	0	0	0	0	0	0	0	0.00407598
1033	Actinobacteria	Actinobacteria	Frankiales	Nakamurellaceae	Humicoccus	0.0244559	0	0	0	0.0489117	0	0	0	0	0	0	0	0	0	0	0	0	0	0.00407598
1057	Bacteroidetes	Bacteroidia	Bacteroidales	Bacteroidales_unclassified	Bacteroidales_unclassified	0	0	0	0	0	0	0.0244559	0	0	0	0.0244559	0	0.0244559	0	0	0	0	0	0.00407598
1062	Bacteroidetes	Bacteroidia	Bacteroidales	Porphyromonadaceae_1	Dysgonomonas	0	0	0	0.0489117	0	0	0	0	0	0	0	0.0244559	0	0	0	0	0	0	0.00407598
1085	Bacteroidetes	Bacteroidia	Bacteroidales	Rikenellaceae	Rikenellaceae_unclassified	0.0244559	0	0	0	0	0	0	0	0	0	0.0244559	0	0	0	0	0	0.0244559	0	0.00407598
1087	Bacteroidetes	Bacteroidia	Bacteroidales	Rikenellaceae	Rikenellaceae_unclassified	0.0244559	0	0	0	0.0489117	0	0	0	0	0	0	0	0	0	0	0	0	0	0.00407598
1089	Bacteroidetes	Sphingobacteria	Sphingobacteria_unclassified	Sphingobacteria_unclassified	Sphingobacteria_unclassified	0	0	0	0.0733676	0	0	0	0	0	0	0	0	0	0	0	0	0	0	0.00407598
1122	Firmicutes	Clostridia_1	Clostridiales	Lachnospiraceae	Gut_cluster_13	0.0244559	0	0	0	0	0	0	0	0	0	0	0	0.0244559	0	0.0244559	0	0	0	0.00407598
1138	Firmicutes	Clostridia_1	Clostridiales	Lachnospiraceae	Lachnospiraceae_unclassified	0	0.0244559	0	0	0	0.0244559	0	0.0244559	0	0	0	0	0	0	0	0	0	0	0.00407598
1143	Firmicutes	Clostridia_1	Clostridiales	Lachnospiraceae	Lachnospiraceae_unclassified	0	0	0	0.0244559	0	0	0	0	0	0	0.0244559	0.0244559	0	0	0	0	0	0	0.00407598
1148	Firmicutes	Clostridia_1	Clostridiales	Lachnospiraceae	Shuttleworthia	0	0	0	0.0244559	0	0	0	0	0	0	0.0244559	0.0244559	0	0	0	0	0	0	0.00407598
1162	Firmicutes	Clostridia_1	Clostridiales	Ruminococcaceae	Ruminococcaceae_unclassified	0.0244559	0	0	0	0	0	0	0	0	0.0244559	0	0	0.0244559	0	0	0	0	0	0.00407598
1178	Firmicutes	Clostridia_1	Clostridiales	Ruminococcaceae	Ruminococcaceae_unclassified	0.0489117	0	0	0	0	0	0	0.0244559	0	0	0	0	0	0	0	0	0	0	0.00407598
1179	Firmicutes	Clostridia_1	Clostridiales	Ruminococcaceae	Ruminococcaceae_unclassified	0	0	0	0	0.0244559	0	0	0.0244559	0	0	0	0.0244559	0	0	0	0	0	0	0.00407598
1182	Firmicutes	Clostridia_1	Clostridiales	Ruminococcaceae	Ruminococcaceae_unclassified	0	0	0	0	0	0	0	0	0	0.0244559	0	0.0244559	0.0244559	0	0	0	0	0	0.00407598
1193	Firmicutes	Clostridia_1	Clostridiales	Ruminococcaceae	Uncultured_12	0.0244559	0	0	0.0244559	0	0	0	0	0	0	0	0.0244559	0	0	0	0	0	0	0.00407598
1203	Firmicutes	Firmicutes_unclassified	Firmicutes_unclassified	Firmicutes_unclassified	Firmicutes_unclassified	0.0244559	0	0	0	0	0	0	0	0	0	0.0489117	0	0	0	0	0	0	0	0.00407598
1208	Firmicutes	Firmicutes_unclassified	Firmicutes_unclassified	Firmicutes_unclassified	Firmicutes_unclassified	0	0.0244559	0	0	0	0	0	0	0	0	0	0	0	0	0.0489117	0	0	0	0.00407598
1209	Firmicutes	Firmicutes_unclassified	Firmicutes_unclassified	Firmicutes_unclassified	Firmicutes_unclassified	0.0244559	0	0	0	0.0244559	0	0	0	0	0	0	0	0	0	0	0	0.0244559	0	0.00407598
1213	Firmicutes	Firmicutes_unclassified	Firmicutes_unclassified	Firmicutes_unclassified	Firmicutes_unclassified	0	0	0	0.0244559	0	0	0.0244559	0	0	0	0	0	0.0244559	0	0	0	0	0	0.00407598
1232	Proteobacteria	Alphaproteobacteria	Rhizobiales_2	Xanthobacteraceae	Uncultured_2	0	0	0	0	0	0	0	0.0244559	0	0	0	0	0	0	0.0244559	0	0.0244559	0	0.00407598
1247	Proteobacteria	Deltaproteobacteria	Desulfovibrionales	Desulfovibrionaceae	Gut_cluster_3	0	0	0	0.0244559	0	0	0	0	0	0	0.0244559	0.0244559	0	0	0	0	0	0	0.00407598
1253	Proteobacteria	Gammaproteobacteria_1	Enterobacteriales	Enterobacteriaceae	Enterobacteriaceae_unclassified	0.0244559	0	0	0	0	0	0	0	0	0	0	0	0.0244559	0	0.0244559	0	0	0	0.00407598
1032	Actinobacteria	Actinobacteria	Corynebacteriales	Nocardiaceae	Rhodococcus_2	0.0489117	0	0	0	0.0244559	0	0	0	0	0	0	0	0	0	0	0	0	0	0.00407598
1047	Bacteroidetes	Bacteroidia	Bacteroidales	Bacteroidales_unclassified	Bacteroidales_unclassified	0	0.0244559	0	0	0	0	0	0	0	0	0	0	0	0.0489117	0	0	0	0	0.00407598
1059	Bacteroidetes	Bacteroidia	Bacteroidales	Bacteroidales_unclassified	Bacteroidales_unclassified	0.0489117	0	0	0.0244559	0	0	0	0	0	0	0	0	0	0	0	0	0	0	0.00407598
1064	Bacteroidetes	Bacteroidia	Bacteroidales	Porphyromonadaceae_2	Paludibacter	0	0	0	0.0244559	0	0	0	0	0	0	0.0244559	0	0	0	0.0244559	0	0	0	0.00407598
1123	Firmicutes	Clostridia_1	Clostridiales	Lachnospiraceae	Gut_cluster_13	0	0.0244559	0	0	0	0	0	0	0	0.0244559	0	0	0	0.0244559	0	0	0	0	0.00407598
1132	Firmicutes	Clostridia_1	Clostridiales	Lachnospiraceae	Lachnospiraceae_unclassified	0	0.0244559	0	0.0244559	0	0.0244559	0	0	0	0	0	0	0	0	0	0	0	0	0.00407598
1186	Firmicutes	Clostridia_1	Clostridiales	Ruminococcaceae	Ruminococcaceae_unclassified	0	0	0	0	0	0	0	0.0244559	0	0	0.0244559	0	0	0	0.0244559	0	0	0	0.00407598
1231	Proteobacteria	Alphaproteobacteria	Rhizobiales_1	Rhizobiaceae	Rhizobium-Agrobacterium	0	0.0244559	0	0	0	0	0	0	0	0.0244559	0	0	0	0.0244559	0	0	0	0	0.00407598
1239	Proteobacteria	Deltaproteobacteria	Desulfovibrionales	Desulfovibrionaceae	Desulfovibrionaceae_unclassified	0	0.0244559	0	0	0	0	0.0244559	0	0	0	0	0	0	0	0.0244559	0	0	0	0.00407598
1248	Proteobacteria	Deltaproteobacteria	Desulfovibrionales	Desulfovibrionaceae	Gut_cluster_3	0	0	0	0	0	0	0	0	0	0	0	0	0	0	0.0244559	0	0.0489117	0	0.00407598
1261	Tenericutes	Mollicutes	RF9	RF9_unclassified	RF9_unclassified	0	0	0	0	0	0	0	0	0	0	0	0	0	0	0.0244559	0	0.0489117	0	0.00407598
884	Actinobacteria	Actinobacteria	Solirubrobacterales	Solirubrobacteriaceae	Solirubrobacter	0	0	0	0	0	0	0	0	0	0	0	0	0	0.0244559	0	0	0.0489117	0	0.00407598
1037	Actinobacteria	Actinobacteria	Micromonosporales	Micromonosporaceae	Catelliglobosispora	0	0.0244559	0	0	0	0	0.0244559	0	0	0.0244559	0	0	0	0	0	0	0	0	0.00407598
1040	Actinobacteria	Actinobacteria	Streptosporangiales	Thermomonosporaceae_2	Actinoallomurus	0	0	0	0	0	0	0	0	0	0.0244559	0	0	0	0	0	0	0.0489117	0	0.00407598
1044	Bacteroidetes	Bacteroidetes_unclassified	Bacteroidetes_unclassified	Bacteroidetes_unclassified	Bacteroidetes_unclassified	0	0	0	0	0	0	0	0	0	0.0244559	0.0489117	0	0	0	0	0	0	0	0.00407598
1048	Bacteroidetes	Bacteroidia	Bacteroidales	Bacteroidales_unclassified	Bacteroidales_unclassified	0.0244559	0	0	0	0	0	0	0.0244559	0	0	0	0	0	0.0244559	0	0	0	0	0.00407598
1055	Bacteroidetes	Bacteroidia	Bacteroidales	Bacteroidales_unclassified	Bacteroidales_unclassified	0	0	0	0.0244559	0	0	0	0	0	0	0	0	0	0.0244559	0	0	0.0244559	0	0.00407598
1065	Bacteroidetes	Bacteroidia	Bacteroidales	Porphyromonadaceae_2	Porphyromonadaceae_2_unclassified	0	0	0	0	0.0244559	0	0	0.0244559	0	0.0244559	0	0	0	0	0	0	0	0	0.00407598
1067	Bacteroidetes	Bacteroidia	Bacteroidales	Porphyromonadaceae_2	Termite_cluster_2	0	0	0	0	0.0244559	0	0	0	0	0	0	0	0	0.0244559	0	0	0.0244559	0	0.00407598
1068	Bacteroidetes	Bacteroidia	Bacteroidales	Porphyromonadaceae_3	Parabacteroides	0	0	0	0	0.0244559	0	0	0	0	0	0	0	0	0.0244559	0	0	0.0244559	0	0.00407598
1092	Chloroflexi	Thermomicrobia	JG30-KF-CM45	JG30-KF-CM45_unclassified	JG30-KF-CM45_unclassified	0	0.0244559	0	0	0	0.0244559	0	0	0	0	0	0.0244559	0	0	0	0	0	0	0.00407598
1103	Firmicutes	Bacilli	Lactobacillales	Lactobacillales_unclassified	Lactobacillales_unclassified	0	0	0	0.0244559	0	0	0.0244559	0.0244559	0	0	0	0	0	0	0	0	0	0	0.00407598
1131	Firmicutes	Clostridia_1	Clostridiales	Lachnospiraceae	Lachnospiraceae_unclassified	0	0	0	0	0	0	0	0	0	0	0	0	0.0244559	0	0.0489117	0	0	0	0.00407598
1140	Firmicutes	Clostridia_1	Clostridiales	Lachnospiraceae	Lachnospiraceae_unclassified	0	0	0	0	0	0	0	0.0244559	0	0	0	0	0	0.0244559	0	0	0.0244559	0	0.00407598
1169	Firmicutes	Clostridia_1	Clostridiales	Ruminococcaceae	Ruminococcaceae_unclassified	0.0244559	0	0	0	0	0	0	0	0	0	0	0.0489117	0	0	0	0	0	0	0.00407598
1174	Firmicutes	Clostridia_1	Clostridiales	Ruminococcaceae	Ruminococcaceae_unclassified	0	0	0	0	0.0244559	0	0	0	0	0	0	0.0244559	0	0	0.0244559	0	0	0	0.00407598
1181	Firmicutes	Clostridia_1	Clostridiales	Ruminococcaceae	Ruminococcaceae_unclassified	0.0244559	0	0	0	0	0	0	0.0244559	0	0	0	0	0	0	0.0244559	0	0	0	0.00407598
1211	Firmicutes	Firmicutes_unclassified	Firmicutes_unclassified	Firmicutes_unclassified	Firmicutes_unclassified	0.0489117	0	0	0	0	0	0	0	0	0	0	0.0244559	0	0	0	0	0	0	0.00407598
1218	Planctomycetes	Planctomycetacia	Planctomycetales	Planctomycetaceae	Planctomycetaceae_unclassified	0	0	0	0	0	0	0	0	0	0	0	0.0733676	0	0	0	0	0	0	0.00407598
1222	Planctomycetes	Planctomycetacia	Planctomycetales	Planctomycetaceae	Singulisphaera	0	0	0	0	0	0	0	0	0	0.0244559	0	0	0.0244559	0	0.0244559	0	0	0	0.00407598
1255	Proteobacteria	Gammaproteobacteria_1	Gammaproteobacteria_1_unclassified	Gammaproteobacteria_1_unclassified	Gammaproteobacteria_1_unclassified	0	0	0	0.0244559	0	0	0	0.0244559	0	0	0	0	0	0.0244559	0	0	0	0	0.00407598
1257	Proteobacteria	Proteobacteria_unclassified	Proteobacteria_unclassified	Proteobacteria_unclassified	Proteobacteria_unclassified	0.0489117	0	0	0	0	0	0	0	0	0	0	0.0244559	0	0	0	0	0	0	0.00407598
1258	Proteobacteria	Proteobacteria_unclassified	Proteobacteria_unclassified	Proteobacteria_unclassified	Proteobacteria_unclassified	0	0	0	0	0.0244559	0	0	0	0	0	0	0	0	0	0.0244559	0	0.0244559	0	0.00407598
1267	Verrucomicrobia	Verrucomicrobiae	Verrucomicrobiales	Verrucomicrobiaceae_1	Haloferula	0	0	0	0.0489117	0	0	0	0	0	0.0244559	0	0	0	0	0	0	0	0	0.00407598
1038	Actinobacteria	Actinobacteria	Micromonosporales	Micromonosporaceae	Micromonosporaceae_unclassified	0.0244559	0	0	0	0	0	0	0	0	0	0.0244559	0	0	0.0244559	0	0	0	0	0.00407598
1119	Firmicutes	Clostridia_1	Clostridiales	Lachnospiraceae	Gut_cluster_13	0	0	0	0	0	0	0	0	0	0	0.0244559	0.0244559	0	0.0244559	0	0	0	0	0.00407598
1142	Firmicutes	Clostridia_1	Clostridiales	Lachnospiraceae	Lachnospiraceae_unclassified	0	0	0	0	0	0	0	0	0	0	0	0.0244559	0	0.0244559	0	0	0.0244559	0	0.00407598
1166	Firmicutes	Clostridia_1	Clostridiales	Ruminococcaceae	Ruminococcaceae_unclassified	0.0244559	0	0	0	0	0	0	0	0	0.0244559	0.0244559	0	0	0	0	0	0	0	0.00407598
1183	Firmicutes	Clostridia_1	Clostridiales	Ruminococcaceae	Ruminococcaceae_unclassified	0	0.0244559	0	0	0	0.0244559	0	0	0	0	0	0	0	0	0.0244559	0	0	0	0.00407598
1206	Firmicutes	Firmicutes_unclassified	Firmicutes_unclassified	Firmicutes_unclassified	Firmicutes_unclassified	0.0244559	0	0	0.0244559	0	0	0	0	0	0.0244559	0	0	0	0	0	0	0	0	0.00407598
1223	Planctomycetes	Planctomycetacia	Planctomycetales	Planctomycetaceae	Singulisphaera	0	0	0	0	0	0	0.0244559	0	0	0	0.0489117	0	0	0	0	0	0	0	0.00407598
1249	Proteobacteria	Deltaproteobacteria	Desulfovibrionales	Desulfovibrionaceae	Gut_cluster_3	0	0	0	0	0.0489117	0	0.0244559	0	0	0	0	0	0	0	0	0	0	0	0.00407598
1129	Firmicutes	Clostridia_1	Clostridiales	Lachnospiraceae	Gut_cluster_13	0.0489117	0	0	0	0	0	0	0	0	0	0	0	0	0.0244559	0	0	0	0	0.00407598
1165	Firmicutes	Clostridia_1	Clostridiales	Ruminococcaceae	Ruminococcaceae_unclassified	0	0	0	0	0.0244559	0	0	0	0	0	0	0	0	0	0.0489117	0	0	0	0.00407598
1202	Firmicutes	Clostridia_2	Clostridiales_1	Veillonellaceae	Veillonellaceae_unclassified	0.0244559	0	0	0	0	0	0	0	0	0	0	0.0244559	0	0.0244559	0	0	0	0	0.00407598
1228	Planctomycetes	vadinHA49	Insect_cluster	Insect_cluster_unclassified	Insect_cluster_unclassified	0	0	0	0	0	0.0244559	0	0.0244559	0	0	0	0	0	0	0	0	0.0244559	0	0.00407598
1263	Tenericutes	Mollicutes	RF9	RF9_unclassified	RF9_unclassified	0	0	0	0.0244559	0	0	0.0244559	0	0	0	0	0.0244559	0	0	0	0	0	0	0.00407598
1094	Firmicutes	Bacilli	Bacillales	Paenibacillaceae_2	Cohnella	0.0244559	0	0	0	0	0.0244559	0	0.0244559	0	0	0	0	0	0	0	0	0	0	0.00407598
1124	Firmicutes	Clostridia_1	Clostridiales	Lachnospiraceae	Gut_cluster_13	0.0244559	0	0	0	0	0	0	0	0	0	0	0	0	0	0.0489117	0	0	0	0.00407598
1220	Planctomycetes	Planctomycetacia	Planctomycetales	Planctomycetaceae	Planctomycetaceae_unclassified	0	0	0	0	0	0	0	0	0	0	0.0244559	0	0	0.0244559	0.0244559	0	0	0	0.00407598
1235	Proteobacteria	Betaproteobacteria	Burkholderiales	Alcaligenaceae_1	Alcaligenaceae_1_unclassified	0	0	0	0	0	0	0	0.0244559	0	0.0244559	0	0	0	0.0244559	0	0	0	0	0.00407598
1260	Synergistetes	Synergistia	Synergistales	Synergistaceae	Candidatus_Tammella	0	0	0	0	0	0	0.0244559	0	0	0	0.0244559	0	0	0	0.0244559	0	0	0	0.00407598
1072	Bacteroidetes	Bacteroidia	Bacteroidales	Porphyromonadaceae_3	Porphyromonadaceae_3_unclassified	0	0	0	0	0	0	0	0	0	0.0244559	0	0	0	0.0244559	0	0	0.0244559	0	0.00407598
1102	Firmicutes	Bacilli	Lactobacillales	Lactobacillales_unclassified	Lactobacillales_unclassified	0	0	0	0	0	0	0	0	0	0	0	0	0	0.0489117	0	0	0.0244559	0	0.00407598
1104	Firmicutes	Bacilli	Lactobacillales	Lactobacillales_unclassified	Lactobacillales_unclassified	0	0	0	0	0	0	0	0	0	0.0244559	0	0	0	0.0244559	0	0	0.0244559	0	0.00407598
1110	Firmicutes	Clostridia_1	Clostridiales	Clostridiales_unclassified	Clostridiales_unclassified	0	0	0	0	0	0	0	0	0	0	0	0	0	0.0489117	0	0	0.0244559	0	0.00407598
1114	Firmicutes	Clostridia_1	Clostridiales	Family_XIII_Incertae_Sedis	Family_XIII_Incertae_Sedis_unclassified	0	0	0	0	0	0.0244559	0.0244559	0	0	0	0	0	0.0244559	0	0	0	0	0	0.00407598
1126	Firmicutes	Clostridia_1	Clostridiales	Lachnospiraceae	Gut_cluster_13	0.0244559	0	0	0.0244559	0	0.0244559	0	0	0	0	0	0	0	0	0	0	0	0	0.00407598
1128	Firmicutes	Clostridia_1	Clostridiales	Lachnospiraceae	Gut_cluster_13	0	0	0	0	0.0244559	0	0	0	0	0	0	0	0	0.0489117	0	0	0	0	0.00407598
1133	Firmicutes	Clostridia_1	Clostridiales	Lachnospiraceae	Lachnospiraceae_unclassified	0	0	0	0	0	0	0	0	0	0.0489117	0.0244559	0	0	0	0	0	0	0	0.00407598
1157	Firmicutes	Clostridia_1	Clostridiales	Ruminococcaceae	Papillibacter	0	0	0	0	0.0244559	0	0.0244559	0	0	0	0	0	0	0	0.0244559	0	0	0	0.00407598
1173	Firmicutes	Clostridia_1	Clostridiales	Ruminococcaceae	Ruminococcaceae_unclassified	0.0244559	0	0	0	0	0	0.0244559	0	0	0	0	0	0	0	0.0244559	0	0	0	0.00407598
1210	Firmicutes	Firmicutes_unclassified	Firmicutes_unclassified	Firmicutes_unclassified	Firmicutes_unclassified	0.0244559	0	0	0	0	0	0	0	0	0	0	0	0	0.0489117	0	0	0	0	0.00407598
1254	Proteobacteria	Gammaproteobacteria_1	Enterobacteriales	Enterobacteriaceae	Enterobacteriaceae_unclassified	0	0	0	0.0244559	0	0	0.0244559	0	0	0	0	0	0	0.0244559	0	0	0	0	0.00407598
1026	Actinobacteria	Actinobacteria	Actinobacteria_unclassified	Actinobacteria_unclassified	Actinobacteria_unclassified	0	0	0	0	0	0.0244559	0	0	0	0	0	0.0489117	0	0	0	0	0	0	0.00407598
1083	Bacteroidetes	Bacteroidia	Bacteroidales	Rikenellaceae	Alisitpes_IV	0.0489117	0	0	0	0	0.0244559	0	0	0	0	0	0	0	0	0	0	0	0	0.00407598
1130	Firmicutes	Clostridia_1	Clostridiales	Lachnospiraceae	Gut_cluster_13	0	0	0	0	0	0	0.0489117	0	0	0	0	0.0244559	0	0	0	0	0	0	0.00407598
1136	Firmicutes	Clostridia_1	Clostridiales	Lachnospiraceae	Lachnospiraceae_unclassified	0	0	0	0	0	0	0	0	0	0	0	0	0	0.0489117	0.0244559	0	0	0	0.00407598
1137	Firmicutes	Clostridia_1	Clostridiales	Lachnospiraceae	Lachnospiraceae_unclassified	0	0	0	0	0	0	0	0	0	0.0489117	0	0	0	0	0.0244559	0	0	0	0.00407598
1163	Firmicutes	Clostridia_1	Clostridiales	Ruminococcaceae	Ruminococcaceae_unclassified	0	0	0	0	0	0	0	0	0	0.0733676	0	0	0	0	0	0	0	0	0.00407598
1192	Firmicutes	Clostridia_1	Clostridiales	Ruminococcaceae	Uncultured_10	0	0	0	0	0	0	0	0	0	0	0	0	0	0.0733676	0	0	0	0	0.00407598
1225	Planctomycetes	Planctomycetacia	Planctomycetales	Planctomycetaceae	Termite_cockroach_cluster_2	0.0244559	0	0	0	0	0	0.0244559	0	0	0.0244559	0	0	0	0	0	0	0	0	0.00407598
1236	Proteobacteria	Betaproteobacteria	Burkholderiales	Oxalobacteraceae	Oxalobacteraceae_unclassified	0	0	0	0	0	0	0.0489117	0	0	0	0.0244559	0	0	0	0	0	0	0	0.00407598
1237	Proteobacteria	Betaproteobacteria	SC-I-84	Insect_cluster_II	Insect_cluster_II_unclassified	0.0489117	0	0	0	0	0.0244559	0	0	0	0	0	0	0	0	0	0	0	0	0.00407598
1266	Verrucomicrobia	Spartobacteria	Chthoniobacter	Chthoniobacter_unclassified	Chthoniobacter_unclassified	0	0	0	0	0	0	0	0	0	0.0733676	0	0	0	0	0	0	0	0	0.00407598
1079	Bacteroidetes	Bacteroidia	Bacteroidales	Rikenellaceae	Alisitpes_IV	0.0244559	0	0	0	0	0.0244559	0	0	0	0	0	0	0	0.0244559	0	0	0	0	0.00407598
1172	Firmicutes	Clostridia_1	Clostridiales	Ruminococcaceae	Ruminococcaceae_unclassified	0	0	0	0	0	0	0.0244559	0	0	0	0	0	0	0.0244559	0.0244559	0	0	0	0.00407598
1189	Firmicutes	Clostridia_1	Clostridiales	Ruminococcaceae	Termite_cockroach_cluster	0	0	0	0	0	0.0244559	0.0244559	0	0	0	0.0244559	0	0	0	0	0	0	0	0.00407598
1200	Firmicutes	Clostridia_2	Clostridiales_1	Peptococcaceae_1	Uncultured_2	0	0	0	0	0	0.0244559	0.0244559	0	0	0	0	0	0	0	0	0	0.0244559	0	0.00407598
1150	Firmicutes	Clostridia_1	Clostridiales	Ruminococcaceae	Gut_cluster_1	0	0	0	0	0	0.0489117	0	0	0	0	0.0244559	0	0	0	0	0	0	0	0.00407598
800	Firmicutes	Bacilli	Bacillales	Bacillales_unclassified	Bacillales_unclassified	0	0	0	0	0	0.0244559	0	0	0	0	0	0	0	0.0489117	0	0	0	0	0.00407598
1120	Firmicutes	Clostridia_1	Clostridiales	Lachnospiraceae	Gut_cluster_13	0	0	0	0	0	0.0244559	0	0	0	0	0	0	0	0.0489117	0	0	0	0	0.00407598
1134	Firmicutes	Clostridia_1	Clostridiales	Lachnospiraceae	Lachnospiraceae_unclassified	0	0	0	0	0	0.0244559	0	0	0	0.0489117	0	0	0	0	0	0	0	0	0.00407598
1185	Firmicutes	Clostridia_1	Clostridiales	Ruminococcaceae	Ruminococcaceae_unclassified	0	0	0	0	0	0.0244559	0	0	0	0	0	0	0	0.0489117	0	0	0	0	0.00407598
1201	Firmicutes	Clostridia_2	Clostridiales_1	Veillonellaceae	Uncultured_7	0	0	0	0	0	0.0244559	0	0	0	0	0	0	0	0.0489117	0	0	0	0	0.00407598
1224	Planctomycetes	Planctomycetacia	Planctomycetales	Planctomycetaceae	Termite_cockroach_cluster_2	0	0	0	0	0	0.0244559	0	0	0	0.0244559	0	0	0	0.0244559	0	0	0	0	0.00407598
1227	Planctomycetes	Planctomycetacia	Planctomycetales	Planctomycetaceae	Termite_cockroach_cluster_2	0.0244559	0	0	0	0	0.0489117	0	0	0	0	0	0	0	0	0	0	0	0	0.00407598
1070	Bacteroidetes	Bacteroidia	Bacteroidales	Porphyromonadaceae_3	Porphyromonadaceae_3_unclassified	0	0	0	0	0	0.0489117	0	0	0	0	0	0	0	0.0244559	0	0	0	0	0.00407598
1099	Firmicutes	Bacilli	Lactobacillales	Lactobacillaceae	Lactobacillaceae_unclassified	0	0	0	0	0	0.0489117	0.0244559	0	0	0	0	0	0	0	0	0	0	0	0.00407598
1135	Firmicutes	Clostridia_1	Clostridiales	Lachnospiraceae	Lachnospiraceae_unclassified	0	0	0	0	0	0.0489117	0.0244559	0	0	0	0	0	0	0	0	0	0	0	0.00407598
1274	Actinobacteria	Actinobacteria	Actinobacteria_unclassified	Actinobacteria_unclassified	Actinobacteria_unclassified	0	0	0	0	0	0	0	0	0	0	0	0	0	0	0	0.0733676	0	0	0.00407598
1284	Actinobacteria	Actinobacteria	AKIW543	AKIW543_unclassified	AKIW543_unclassified	0	0	0	0	0	0	0	0	0	0	0	0	0	0	0	0	0	0.0733676	0.00407598
1291	Actinobacteria	Actinobacteria	Corynebacteriales	Nocardiaceae	Nocardia	0	0	0.0733676	0	0	0	0	0	0	0	0	0	0	0	0	0	0	0	0.00407598
1325	Bacteroidetes	Bacteroidia	Bacteroidales	Bacteroidales_unclassified	Bacteroidales_unclassified	0	0	0	0	0	0	0	0	0	0	0	0	0	0	0	0.0733676	0	0	0.00407598
1335	Bacteroidetes	Bacteroidia	Bacteroidales	Bacteroidales_unclassified	Bacteroidales_unclassified	0	0	0	0	0	0	0	0	0	0	0	0	0	0	0	0.0733676	0	0	0.00407598
1436	Firmicutes	Clostridia_1	Clostridiales	Clostridiales_unclassified	Clostridiales_unclassified	0	0	0	0	0	0	0	0	0	0	0	0	0	0	0	0	0	0.0733676	0.00407598
1452	Firmicutes	Clostridia_1	Clostridiales	Family_XIII_Incertae_Sedis	Family_XIII_Incertae_Sedis_unclassified	0	0	0	0	0	0	0	0	0.0366838	0	0	0	0	0	0	0	0	0.0366838	0.00407598
1467	Firmicutes	Clostridia_1	Clostridiales	Lachnospiraceae	Gut_cluster_13	0	0	0.0733676	0	0	0	0	0	0	0	0	0	0	0	0	0	0	0	0.00407598
1492	Firmicutes	Clostridia_1	Clostridiales	Lachnospiraceae	Termite_cluster	0	0	0.0733676	0	0	0	0	0	0	0	0	0	0	0	0	0	0	0	0.00407598
1540	Firmicutes	Clostridia_1	Clostridiales	Ruminococcaceae	Ruminococcaceae_unclassified	0	0	0	0	0	0	0	0	0	0	0	0	0	0	0	0	0	0.0733676	0.00407598
1571	Firmicutes	Firmicutes_unclassified	Firmicutes_unclassified	Firmicutes_unclassified	Firmicutes_unclassified	0	0	0.0733676	0	0	0	0	0	0	0	0	0	0	0	0	0	0	0	0.00407598
1595	Firmicutes	Firmicutes_unclassified	Firmicutes_unclassified	Firmicutes_unclassified	Firmicutes_unclassified	0	0	0	0	0	0	0	0	0	0	0	0	0	0	0	0.0733676	0	0	0.00407598
1621	Planctomycetes	Planctomycetacia	Planctomycetales	Planctomycetaceae	Termite_cockroach_cluster_2	0	0	0	0	0	0	0	0	0.0366838	0	0	0	0	0	0	0.0366838	0	0	0.00407598
1626	Planctomycetes	Planctomycetacia	Planctomycetales	Planctomycetaceae	Uncultured_32	0	0	0	0	0	0	0	0	0	0	0	0	0	0	0	0	0	0.0733676	0.00407598
1628	Planctomycetes	Planctomycetacia	Planctomycetales	Planctomycetaceae	Zavarzinella	0	0	0.0733676	0	0	0	0	0	0	0	0	0	0	0	0	0	0	0	0.00407598
1683	Proteobacteria	Deltaproteobacteria	Rs-K70	Insect_cluster	Insect_cluster_unclassified	0	0	0	0	0	0	0	0	0	0	0	0	0	0	0	0	0	0.0733676	0.00407598
1412	Firmicutes	Bacilli	Lactobacillales	Lactobacillales_unclassified	Lactobacillales_unclassified	0	0.0244559	0.0366838	0	0	0	0	0	0	0	0	0	0	0	0	0	0	0	0.00339665
1447	Firmicutes	Clostridia_1	Clostridiales	Clostridiales_unclassified	Clostridiales_unclassified	0	0.0244559	0	0	0	0	0	0	0	0	0	0	0	0	0	0.0366838	0	0	0.00339665
1637	Proteobacteria	Alphaproteobacteria	Rhizobiales_3	Hyphomicrobiaceae	Pedomicrobium	0	0.0244559	0	0	0	0	0	0	0	0	0	0	0	0	0	0.0366838	0	0	0.00339665
1651	Proteobacteria	Betaproteobacteria	SC-I-84	Insect_cluster_II	Insect_cluster_II_unclassified	0	0.0244559	0	0	0	0	0	0	0	0	0	0	0	0	0	0.0366838	0	0	0.00339665
1324	Bacteroidetes	Bacteroidia	Bacteroidales	Bacteroidales_unclassified	Bacteroidales_unclassified	0	0	0	0	0	0	0	0	0	0	0	0	0.0244559	0	0	0	0	0.0366838	0.00339665
1359	Bacteroidetes	Bacteroidia	Bacteroidales	Porphyromonadaceae_3	Porphyromonadaceae_3_unclassified	0	0	0.0366838	0	0	0	0	0	0	0	0	0	0.0244559	0	0	0	0	0	0.00339665
1408	Firmicutes	Bacilli	Lactobacillales	Lactobacillales_unclassified	Lactobacillales_unclassified	0	0	0	0	0	0	0	0	0	0	0	0	0.0244559	0	0	0.0366838	0	0	0.00339665
1419	Firmicutes	Bacilli	Lactobacillales	Streptococcaceae	Lactococcus_2	0	0	0	0	0	0	0	0	0	0	0	0	0.0244559	0	0	0.0366838	0	0	0.00339665
1450	Firmicutes	Clostridia_1	Clostridiales	Eubacteriaceae_1	Eubacterium_1	0	0	0	0	0	0	0	0	0	0	0	0	0.0244559	0	0	0	0	0.0366838	0.00339665
1479	Firmicutes	Clostridia_1	Clostridiales	Lachnospiraceae	Lachnospiraceae_unclassified	0	0	0	0	0	0	0	0	0	0	0	0	0.0244559	0	0	0.0366838	0	0	0.00339665
1560	Firmicutes	Clostridia_1	Clostridiales	Ruminococcaceae	Termite_cockroach_cluster	0	0	0.0366838	0	0	0	0	0	0	0	0	0	0.0244559	0	0	0	0	0	0.00339665
1658	Proteobacteria	Deltaproteobacteria	Desulfobacterales	Desulfobacteraceae	Desulfobacteraceae_unclassified	0	0	0	0	0	0	0	0	0	0	0	0	0.0244559	0	0	0.0366838	0	0	0.00339665
1323	Bacteroidetes	Bacteroidia	Bacteroidales	Bacteroidales_unclassified	Bacteroidales_unclassified	0	0	0	0	0	0	0	0.0244559	0	0	0	0	0	0	0	0.0366838	0	0	0.00339665
1629	Planctomycetes	vadinHA49	Insect_cluster	Insect_cluster_unclassified	Insect_cluster_unclassified	0	0	0.0366838	0	0	0	0	0.0244559	0	0	0	0	0	0	0	0	0	0	0.00339665
1649	Proteobacteria	Betaproteobacteria	Burkholderiales	Comamonadaceae	Comamonadaceae_unclassified	0	0	0	0	0	0	0	0.0244559	0	0	0	0	0	0	0	0	0	0.0366838	0.00339665
1672	Proteobacteria	Deltaproteobacteria	Desulfovibrionales	Desulfovibrionaceae	Gut_cluster_3	0	0	0	0	0	0	0	0.0244559	0	0	0	0	0	0	0	0	0	0.0366838	0.00339665
1677	Proteobacteria	Deltaproteobacteria	Desulfovibrionales	Desulfovibrionaceae	Gut_cluster_3	0	0	0	0	0	0	0	0.0244559	0	0	0	0	0	0	0	0.0366838	0	0	0.00339665
1278	Actinobacteria	Actinobacteria	Actinobacteria_unclassified	Actinobacteria_unclassified	Actinobacteria_unclassified	0	0	0	0	0	0	0	0	0	0	0	0	0	0	0	0	0.0244559	0.0366838	0.00339665
1289	Actinobacteria	Actinobacteria	Corynebacteriales	Mycobacteriaceae	Mycobacterium	0	0	0	0	0	0	0	0	0	0	0.0244559	0	0	0	0	0.0366838	0	0	0.00339665
1322	Bacteroidetes	Bacteroidia	Bacteroidales	Bacteroidales_unclassified	Bacteroidales_unclassified	0	0	0	0	0	0	0	0	0.0366838	0	0	0	0	0	0	0	0.0244559	0	0.00339665
1334	Bacteroidetes	Bacteroidia	Bacteroidales	Bacteroidales_unclassified	Bacteroidales_unclassified	0	0	0	0	0	0	0	0	0	0	0.0244559	0	0	0	0	0	0	0.0366838	0.00339665
1375	Bacteroidetes	Bacteroidia	Bacteroidales	Rikenellaceae	Alisitpes_IV	0	0	0	0	0	0	0	0	0	0	0.0244559	0	0	0	0	0	0	0.0366838	0.00339665
1409	Firmicutes	Bacilli	Lactobacillales	Lactobacillales_unclassified	Lactobacillales_unclassified	0	0	0	0	0	0	0	0	0	0	0.0244559	0	0	0	0	0.0366838	0	0	0.00339665
1484	Firmicutes	Clostridia_1	Clostridiales	Lachnospiraceae	Lachnospiraceae_unclassified	0	0	0	0	0	0	0	0	0	0	0	0	0	0	0	0.0366838	0.0244559	0	0.00339665
1485	Firmicutes	Clostridia_1	Clostridiales	Lachnospiraceae	Lachnospiraceae_unclassified	0	0	0.0366838	0	0	0	0	0	0	0	0	0	0	0	0	0	0.0244559	0	0.00339665
1607	Planctomycetes	Planctomycetacia	Planctomycetales	Planctomycetaceae	Planctomycetaceae_unclassified	0	0	0.0366838	0	0	0	0	0	0	0	0	0	0	0	0	0	0.0244559	0	0.00339665
1617	Planctomycetes	Planctomycetacia	Planctomycetales	Planctomycetaceae	Planctomycetaceae_unclassified	0	0	0	0	0	0	0	0	0.0366838	0	0	0	0	0	0	0	0.0244559	0	0.00339665
1657	Proteobacteria	Deltaproteobacteria	Desulfarculales	Desulfarculaceae	Desulfarculus	0	0	0	0	0	0	0	0	0	0	0	0	0	0	0	0.0366838	0.0244559	0	0.00339665
1664	Proteobacteria	Deltaproteobacteria	Desulfovibrionales	Desulfovibrionaceae	Gut_cluster_3	0	0	0.0366838	0	0	0	0	0	0	0	0	0	0	0	0	0	0.0244559	0	0.00339665
1303	Bacteroidetes	Bacteroidetes_unclassified	Bacteroidetes_unclassified	Bacteroidetes_unclassified	Bacteroidetes_unclassified	0	0	0	0.0244559	0	0	0	0	0	0	0	0	0	0	0	0	0	0.0366838	0.00339665
1326	Bacteroidetes	Bacteroidia	Bacteroidales	Bacteroidales_unclassified	Bacteroidales_unclassified	0	0	0	0.0244559	0	0	0	0	0	0	0	0	0	0	0	0.0366838	0	0	0.00339665
1361	Bacteroidetes	Bacteroidia	Bacteroidales	Porphyromonadaceae_3	Tannerella	0	0	0.0366838	0	0.0244559	0	0	0	0	0	0	0	0	0	0	0	0	0	0.00339665
1363	Bacteroidetes	Bacteroidia	Bacteroidales	Porphyromonadaceae_3	Tannerella	0	0	0	0.0244559	0	0	0	0	0	0	0	0	0	0	0	0	0	0.0366838	0.00339665
1372	Bacteroidetes	Bacteroidia	Bacteroidales	Rikenellaceae	Alisitpes_IV	0	0	0	0.0244559	0	0	0	0	0	0	0	0	0	0	0	0	0	0.0366838	0.00339665
1413	Firmicutes	Bacilli	Lactobacillales	Lactobacillales_unclassified	Lactobacillales_unclassified	0	0	0.0366838	0	0.0244559	0	0	0	0	0	0	0	0	0	0	0	0	0	0.00339665
1474	Firmicutes	Clostridia_1	Clostridiales	Lachnospiraceae	Lachnospiraceae_unclassified	0	0	0	0.0244559	0	0	0	0	0	0	0	0	0	0	0	0.0366838	0	0	0.00339665
1548	Firmicutes	Clostridia_1	Clostridiales	Ruminococcaceae	Ruminococcaceae_unclassified	0	0	0	0	0.0244559	0	0	0	0	0	0	0	0	0	0	0	0	0.0366838	0.00339665
1557	Firmicutes	Clostridia_1	Clostridiales	Ruminococcaceae	Termite_cockroach_cluster	0	0	0	0.0244559	0	0	0	0	0	0	0	0	0	0	0	0	0	0.0366838	0.00339665
1594	Firmicutes	Firmicutes_unclassified	Firmicutes_unclassified	Firmicutes_unclassified	Firmicutes_unclassified	0	0	0	0.0244559	0	0	0	0	0	0	0	0	0	0	0	0.0366838	0	0	0.00339665
1652	Proteobacteria	Betaproteobacteria	SC-I-84	Insect_cluster_II	Insect_cluster_II_unclassified	0	0	0.0366838	0	0.0244559	0	0	0	0	0	0	0	0	0	0	0	0	0	0.00339665
1690	Proteobacteria	Proteobacteria_unclassified	Proteobacteria_unclassified	Proteobacteria_unclassified	Proteobacteria_unclassified	0	0	0.0366838	0	0.0244559	0	0	0	0	0	0	0	0	0	0	0	0	0	0.00339665
1694	Proteobacteria	Proteobacteria_unclassified	Proteobacteria_unclassified	Proteobacteria_unclassified	Proteobacteria_unclassified	0	0	0	0.0244559	0	0	0	0	0	0	0	0	0	0	0	0.0366838	0	0	0.00339665
1288	Actinobacteria	Actinobacteria	Corynebacteriales	Corynebacteriales_unclassified	Corynebacteriales_unclassified	0.0244559	0	0.0366838	0	0	0	0	0	0	0	0	0	0	0	0	0	0	0	0.00339665
1315	Bacteroidetes	Bacteroidia	Bacteroidales	Bacteroidales_unclassified	Bacteroidales_unclassified	0	0	0	0	0	0	0	0	0	0	0	0.0244559	0	0	0	0.0366838	0	0	0.00339665
1358	Bacteroidetes	Bacteroidia	Bacteroidales	Porphyromonadaceae_3	Porphyromonadaceae_3_unclassified	0.0244559	0	0	0	0	0	0	0	0.0366838	0	0	0	0	0	0	0	0	0	0.00339665
1393	Cyanobacteria	Cyanobacteria	Cyanobacteriales	SHA-109	SHA-109_unclassified	0.0244559	0	0	0	0	0	0	0	0	0	0	0	0	0	0	0.0366838	0	0	0.00339665
1444	Firmicutes	Clostridia_1	Clostridiales	Clostridiales_unclassified	Clostridiales_unclassified	0.0244559	0	0.0366838	0	0	0	0	0	0	0	0	0	0	0	0	0	0	0	0.00339665
1524	Firmicutes	Clostridia_1	Clostridiales	Ruminococcaceae	Ruminococcaceae_unclassified	0.0244559	0	0	0	0	0	0	0	0	0	0	0	0	0	0	0.0366838	0	0	0.00339665
1535	Firmicutes	Clostridia_1	Clostridiales	Ruminococcaceae	Ruminococcaceae_unclassified	0	0	0.0366838	0	0	0	0	0	0	0	0	0.0244559	0	0	0	0	0	0	0.00339665
1545	Firmicutes	Clostridia_1	Clostridiales	Ruminococcaceae	Ruminococcaceae_unclassified	0	0	0	0	0	0	0	0	0	0	0	0.0244559	0	0	0	0.0366838	0	0	0.00339665
1547	Firmicutes	Clostridia_1	Clostridiales	Ruminococcaceae	Ruminococcaceae_unclassified	0	0	0	0	0	0	0	0	0	0	0	0.0244559	0	0	0	0	0	0.0366838	0.00339665
1575	Firmicutes	Firmicutes_unclassified	Firmicutes_unclassified	Firmicutes_unclassified	Firmicutes_unclassified	0	0	0	0	0	0	0	0	0	0	0	0.0244559	0	0	0	0.0366838	0	0	0.00339665
1602	Planctomycetes	Planctomycetacia	Planctomycetales	Planctomycetaceae	Planctomyces_1	0	0	0	0	0	0	0	0	0	0	0	0.0244559	0	0	0	0	0	0.0366838	0.00339665
1680	Proteobacteria	Deltaproteobacteria	Desulfovibrionales	Desulfovibrionales_unclassified	Desulfovibrionales_unclassified	0	0	0.0366838	0	0	0	0	0	0	0	0	0.0244559	0	0	0	0	0	0	0.00339665
1327	Bacteroidetes	Bacteroidia	Bacteroidales	Bacteroidales_unclassified	Bacteroidales_unclassified	0	0	0.0366838	0	0	0	0	0	0	0	0	0	0	0	0.0244559	0	0	0	0.00339665
1394	Deferribacteres	Deferribacteres	Deferribacterales	Deferribacteraceae	Mucispirillum	0	0	0.0366838	0	0	0	0	0	0	0	0	0	0	0	0.0244559	0	0	0	0.00339665
1425	Firmicutes	Clostridia_1	Clostridiales	Clostridiales_unclassified	Clostridiales_unclassified	0	0	0	0	0	0	0	0	0	0	0	0	0	0	0.0244559	0	0	0.0366838	0.00339665
1442	Firmicutes	Clostridia_1	Clostridiales	Clostridiales_unclassified	Clostridiales_unclassified	0	0	0.0366838	0	0	0	0	0	0	0	0	0	0	0	0.0244559	0	0	0	0.00339665
1451	Firmicutes	Clostridia_1	Clostridiales	Family_XIII_Incertae_Sedis	Family_XIII_Incertae_Sedis_unclassified	0	0	0	0	0	0	0	0	0	0	0	0	0	0	0.0244559	0	0	0.0366838	0.00339665
1465	Firmicutes	Clostridia_1	Clostridiales	Lachnospiraceae	Gut_cluster_13	0	0	0	0	0	0	0	0	0	0	0	0	0	0	0.0244559	0.0366838	0	0	0.00339665
1490	Firmicutes	Clostridia_1	Clostridiales	Lachnospiraceae	Lachnospiraceae_unclassified	0	0	0	0	0	0	0	0	0.0366838	0	0	0	0	0	0.0244559	0	0	0	0.00339665
1525	Firmicutes	Clostridia_1	Clostridiales	Ruminococcaceae	Ruminococcaceae_unclassified	0	0	0	0	0	0	0	0	0.0366838	0	0	0	0	0	0.0244559	0	0	0	0.00339665
1536	Firmicutes	Clostridia_1	Clostridiales	Ruminococcaceae	Ruminococcaceae_unclassified	0	0	0	0	0	0	0	0	0	0	0	0	0	0	0.0244559	0.0366838	0	0	0.00339665
1553	Firmicutes	Clostridia_1	Clostridiales	Ruminococcaceae	Termite_cockroach_cluster	0	0	0.0366838	0	0	0	0	0	0	0	0	0	0	0	0.0244559	0	0	0	0.00339665
1650	Proteobacteria	Betaproteobacteria	Burkholderiales	Oxalobacteraceae	Oxalobacteraceae_unclassified	0	0	0	0	0	0	0	0	0	0	0	0	0	0	0.0244559	0	0	0.0366838	0.00339665
1290	Actinobacteria	Actinobacteria	Corynebacteriales	Nocardiaceae	Nocardia	0	0	0.0366838	0	0	0	0	0	0	0.0244559	0	0	0	0	0	0	0	0	0.00339665
1341	Bacteroidetes	Bacteroidia	Bacteroidales	Bacteroidales_unclassified	Bacteroidales_unclassified	0	0	0	0	0	0	0	0	0	0.0244559	0	0	0	0	0	0.0366838	0	0	0.00339665
1398	Firmicutes	Bacilli	Bacilli_unclassified	Bacilli_unclassified	Bacilli_unclassified	0	0	0.0366838	0	0	0	0	0	0	0	0	0	0	0.0244559	0	0	0	0	0.00339665
1418	Firmicutes	Bacilli	Lactobacillales	Streptococcaceae	Lactococcus_2	0	0	0	0	0	0	0	0	0	0	0	0	0	0.0244559	0	0.0366838	0	0	0.00339665
1472	Firmicutes	Clostridia_1	Clostridiales	Lachnospiraceae	Lachnospiraceae_unclassified	0	0	0	0	0	0	0	0	0.0366838	0	0	0	0	0.0244559	0	0	0	0	0.00339665
1483	Firmicutes	Clostridia_1	Clostridiales	Lachnospiraceae	Lachnospiraceae_unclassified	0	0	0	0	0	0	0	0	0.0366838	0	0	0	0	0.0244559	0	0	0	0	0.00339665
1489	Firmicutes	Clostridia_1	Clostridiales	Lachnospiraceae	Lachnospiraceae_unclassified	0	0	0	0	0	0	0	0	0.0366838	0	0	0	0	0.0244559	0	0	0	0	0.00339665
1516	Firmicutes	Clostridia_1	Clostridiales	Ruminococcaceae	Ruminococcaceae_unclassified	0	0	0	0	0	0	0	0	0	0	0	0	0	0.0244559	0	0	0	0.0366838	0.00339665
1591	Firmicutes	Firmicutes_unclassified	Firmicutes_unclassified	Firmicutes_unclassified	Firmicutes_unclassified	0	0	0	0	0	0	0	0	0	0	0	0	0	0.0244559	0	0	0	0.0366838	0.00339665
1600	Planctomycetes	Planctomycetacia	Planctomycetales	Planctomycetaceae	Isosphaera	0	0	0.0366838	0	0	0	0	0	0	0.0244559	0	0	0	0	0	0	0	0	0.00339665
1642	Proteobacteria	Alphaproteobacteria	Sphingomonadales	Sphingomonadaceae	Sphingomonas_2	0	0	0.0366838	0	0	0	0	0	0	0	0	0	0	0.0244559	0	0	0	0	0.00339665
1665	Proteobacteria	Deltaproteobacteria	Desulfovibrionales	Desulfovibrionaceae	Gut_cluster_3	0	0	0	0	0	0	0	0	0	0.0244559	0	0	0	0	0	0.0366838	0	0	0.00339665
1695	Proteobacteria	Proteobacteria_unclassified	Proteobacteria_unclassified	Proteobacteria_unclassified	Proteobacteria_unclassified	0	0	0.0366838	0	0	0	0	0	0	0.0244559	0	0	0	0	0	0	0	0	0.00339665
1377	Bacteroidetes	Bacteroidia	Bacteroidales	Rikenellaceae	Alisitpes_IV	0	0	0	0	0	0	0.0244559	0	0.0366838	0	0	0	0	0	0	0	0	0	0.00339665
1385	Bacteroidetes	Sphingobacteria	Sphingobacteriales_1	SB_1	SB_1_unclassified	0	0	0	0	0	0	0.0244559	0	0	0	0	0	0	0	0	0.0366838	0	0	0.00339665
1417	Firmicutes	Bacilli	Lactobacillales	Leuconostocaceae	Weissella_1	0	0	0	0	0	0	0.0244559	0	0	0	0	0	0	0	0	0.0366838	0	0	0.00339665
1496	Firmicutes	Clostridia_1	Clostridiales	Ruminococcaceae	Gut_cluster_4	0	0	0.0366838	0	0	0	0.0244559	0	0	0	0	0	0	0	0	0	0	0	0.00339665
1503	Firmicutes	Clostridia_1	Clostridiales	Ruminococcaceae	Gut_cluster_7	0	0	0	0	0	0	0.0244559	0	0	0	0	0	0	0	0	0	0	0.0366838	0.00339665
1636	Proteobacteria	Alphaproteobacteria	Rhizobiales_3	Hyphomicrobiaceae	Hyphomicrobiaceae_unclassified	0	0	0	0	0	0	0.0244559	0	0	0	0	0	0	0	0	0	0	0.0366838	0.00339665
1639	Proteobacteria	Alphaproteobacteria	Rhodospirillales_1	Acetobacteraceae	Acetobacteraceae_unclassified	0	0	0.0366838	0	0	0	0.0244559	0	0	0	0	0	0	0	0	0	0	0	0.00339665
1654	Proteobacteria	Deltaproteobacteria	Bdellovibrionales	Bacteriovoraceae	Bacteriovoraceae_unclassified	0	0	0	0	0	0	0.0244559	0	0	0	0	0	0	0	0	0.0366838	0	0	0.00339665
1287	Actinobacteria	Actinobacteria	Corynebacteriales	Corynebacteriales_unclassified	Corynebacteriales_unclassified	0	0	0	0	0	0.0244559	0	0	0	0	0	0	0	0	0	0	0	0.0366838	0.00339665
1293	Actinobacteria	Actinobacteria	Micrococcales_3	Microbacteriaceae	Agromyces_2	0	0	0.0366838	0	0	0.0244559	0	0	0	0	0	0	0	0	0	0	0	0	0.00339665
1298	Actinobacteria	Actinobacteria	Micromonosporales	Micromonosporaceae	Luedemannella	0	0	0	0	0	0.0244559	0	0	0	0	0	0	0	0	0	0	0	0.0366838	0.00339665
1304	Bacteroidetes	Bacteroidetes_unclassified	Bacteroidetes_unclassified	Bacteroidetes_unclassified	Bacteroidetes_unclassified	0	0	0.0366838	0	0	0.0244559	0	0	0	0	0	0	0	0	0	0	0	0	0.00339665
1668	Proteobacteria	Deltaproteobacteria	Desulfovibrionales	Desulfovibrionaceae	Gut_cluster_3	0	0	0.0366838	0	0	0.0244559	0	0	0	0	0	0	0	0	0	0	0	0	0.00339665
1698	Synergistetes	Synergistia	Synergistales	Synergistaceae	Candidatus_Tammella	0	0	0	0	0	0.0244559	0	0	0	0	0	0	0	0	0	0.0366838	0	0	0.00339665
1343	Bacteroidetes	Bacteroidia	Bacteroidales	Marinilabiaceae	Uncultured_1	0	0.0489117	0	0	0	0	0	0	0	0	0	0	0	0	0	0	0	0	0.00271732
1457	Firmicutes	Clostridia_1	Clostridiales	Lachnospiraceae	Catabacter	0	0.0489117	0	0	0	0	0	0	0	0	0	0	0	0	0	0	0	0	0.00271732
1460	Firmicutes	Clostridia_1	Clostridiales	Lachnospiraceae	Gut_cluster_13	0	0.0489117	0	0	0	0	0	0	0	0	0	0	0	0	0	0	0	0	0.00271732
1464	Firmicutes	Clostridia_1	Clostridiales	Lachnospiraceae	Gut_cluster_13	0	0.0489117	0	0	0	0	0	0	0	0	0	0	0	0	0	0	0	0	0.00271732
1533	Firmicutes	Clostridia_1	Clostridiales	Ruminococcaceae	Ruminococcaceae_unclassified	0	0.0489117	0	0	0	0	0	0	0	0	0	0	0	0	0	0	0	0	0.00271732
1551	Firmicutes	Clostridia_1	Clostridiales	Ruminococcaceae	Termite_cockroach_cluster	0	0.0489117	0	0	0	0	0	0	0	0	0	0	0	0	0	0	0	0	0.00271732
1566	Firmicutes	Clostridia_2	Clostridiales_1	Peptococcaceae_1	Uncultured_3	0	0.0489117	0	0	0	0	0	0	0	0	0	0	0	0	0	0	0	0	0.00271732
1601	Planctomycetes	Planctomycetacia	Planctomycetales	Planctomycetaceae	Pirellula	0	0.0489117	0	0	0	0	0	0	0	0	0	0	0	0	0	0	0	0	0.00271732
1623	Planctomycetes	Planctomycetacia	Planctomycetales	Planctomycetaceae	Termite_cockroach_cluster_2	0	0.0489117	0	0	0	0	0	0	0	0	0	0	0	0	0	0	0	0	0.00271732
1634	Proteobacteria	Alphaproteobacteria	Rhizobiales_2	Beijerinckiaceae	Chelatococcus_2	0	0.0489117	0	0	0	0	0	0	0	0	0	0	0	0	0	0	0	0	0.00271732
1653	Proteobacteria	Betaproteobacteria	SC-I-84	Insect_cluster_II	Insect_cluster_II_unclassified	0	0.0489117	0	0	0	0	0	0	0	0	0	0	0	0	0	0	0	0	0.00271732
1693	Proteobacteria	Proteobacteria_unclassified	Proteobacteria_unclassified	Proteobacteria_unclassified	Proteobacteria_unclassified	0	0.0489117	0	0	0	0	0	0	0	0	0	0	0	0	0	0	0	0	0.00271732
1696	Synergistetes	Synergistia	Synergistales	Synergistaceae	Candidatus_Tammella	0	0.0489117	0	0	0	0	0	0	0	0	0	0	0	0	0	0	0	0	0.00271732
1414	Firmicutes	Bacilli	Lactobacillales	Leuconostocaceae	Leuconostocaceae_unclassified	0	0.0244559	0	0	0	0	0	0	0	0	0	0	0.0244559	0	0	0	0	0	0.00271732
1573	Firmicutes	Firmicutes_unclassified	Firmicutes_unclassified	Firmicutes_unclassified	Firmicutes_unclassified	0	0.0244559	0	0	0	0	0	0	0	0	0	0	0.0244559	0	0	0	0	0	0.00271732
1411	Firmicutes	Bacilli	Lactobacillales	Lactobacillales_unclassified	Lactobacillales_unclassified	0	0	0	0	0	0	0	0	0	0	0	0	0.0489117	0	0	0	0	0	0.00271732
1469	Firmicutes	Clostridia_1	Clostridiales	Lachnospiraceae	Gut_cluster_13	0	0	0	0	0	0	0	0	0	0	0	0	0.0489117	0	0	0	0	0	0.00271732
1511	Firmicutes	Clostridia_1	Clostridiales	Ruminococcaceae	Ruminococcaceae_unclassified	0	0.0244559	0	0	0	0	0	0.0244559	0	0	0	0	0	0	0	0	0	0	0.00271732
1513	Firmicutes	Clostridia_1	Clostridiales	Ruminococcaceae	Ruminococcaceae_unclassified	0	0	0	0	0	0	0	0	0	0	0	0	0.0489117	0	0	0	0	0	0.00271732
1631	Proteobacteria	Alphaproteobacteria	Alphaproteobacteria_unclassified	Alphaproteobacteria_unclassified	Alphaproteobacteria_unclassified	0	0	0	0	0	0	0	0	0	0	0	0	0.0489117	0	0	0	0	0	0.00271732
1640	Proteobacteria	Alphaproteobacteria	Rhodospirillales_1	Rhodospirillaceae	Thalassospira	0	0	0	0	0	0	0	0	0	0	0	0	0.0489117	0	0	0	0	0	0.00271732
1675	Proteobacteria	Deltaproteobacteria	Desulfovibrionales	Desulfovibrionaceae	Gut_cluster_3	0	0.0244559	0	0	0	0	0	0.0244559	0	0	0	0	0	0	0	0	0	0	0.00271732
1269	Acidobacteria	Acidobacteria	Acidobacteriales	Acidobacteriaceae	Candidatus_Chloroacidobacterium	0	0.0244559	0	0	0	0	0	0	0	0	0	0	0	0	0	0	0.0244559	0	0.00271732
1270	Acidobacteria	Acidobacteria	Acidobacteriales	Acidobacteriaceae	Uncultured_31	0	0.0244559	0	0	0	0	0	0	0	0	0.0244559	0	0	0	0	0	0	0	0.00271732
1273	Actinobacteria	Actinobacteria	Actinobacteria_unclassified	Actinobacteria_unclassified	Actinobacteria_unclassified	0	0.0244559	0	0	0	0	0	0	0	0	0.0244559	0	0	0	0	0	0	0	0.00271732
1275	Actinobacteria	Actinobacteria	Actinobacteria_unclassified	Actinobacteria_unclassified	Actinobacteria_unclassified	0	0.0244559	0	0.0244559	0	0	0	0	0	0	0	0	0	0	0	0	0	0	0.00271732
1318	Bacteroidetes	Bacteroidia	Bacteroidales	Bacteroidales_unclassified	Bacteroidales_unclassified	0	0.0244559	0	0	0	0	0	0	0	0	0.0244559	0	0	0	0	0	0	0	0.00271732
1365	Bacteroidetes	Bacteroidia	Bacteroidales	Porphyromonadaceae_3	Tannerella	0	0.0244559	0	0	0.0244559	0	0	0	0	0	0	0	0	0	0	0	0	0	0.00271732
1378	Bacteroidetes	Bacteroidia	Bacteroidales	Rikenellaceae	Alisitpes_IV	0	0.0244559	0	0	0.0244559	0	0	0	0	0	0	0	0	0	0	0	0	0	0.00271732
1400	Firmicutes	Bacilli	Bacilli_unclassified	Bacilli_unclassified	Bacilli_unclassified	0	0.0244559	0	0	0	0	0	0	0	0	0.0244559	0	0	0	0	0	0	0	0.00271732
1430	Firmicutes	Clostridia_1	Clostridiales	Clostridiales_unclassified	Clostridiales_unclassified	0	0.0244559	0	0	0.0244559	0	0	0	0	0	0	0	0	0	0	0	0	0	0.00271732
1550	Firmicutes	Clostridia_1	Clostridiales	Ruminococcaceae	Termite_cockroach_cluster	0	0.0244559	0	0	0	0	0	0	0	0	0	0	0	0	0	0	0.0244559	0	0.00271732
1577	Firmicutes	Firmicutes_unclassified	Firmicutes_unclassified	Firmicutes_unclassified	Firmicutes_unclassified	0	0.0244559	0	0	0	0	0	0	0	0	0.0244559	0	0	0	0	0	0	0	0.00271732
1588	Firmicutes	Firmicutes_unclassified	Firmicutes_unclassified	Firmicutes_unclassified	Firmicutes_unclassified	0	0.0244559	0	0	0	0	0	0	0	0	0.0244559	0	0	0	0	0	0	0	0.00271732
1646	Proteobacteria	Betaproteobacteria	Betaproteobacteria_unclassified	Betaproteobacteria_unclassified	Betaproteobacteria_unclassified	0	0.0244559	0	0	0	0	0	0	0	0	0.0244559	0	0	0	0	0	0	0	0.00271732
1656	Proteobacteria	Deltaproteobacteria	Desulfarculales	Desulfarculaceae	Desulfarculus	0	0.0244559	0	0.0244559	0	0	0	0	0	0	0	0	0	0	0	0	0	0	0.00271732
1685	Proteobacteria	Gammaproteobacteria_1	Enterobacteriales	Enterobacteriaceae	Enterobacteriaceae_unclassified	0	0.0244559	0	0	0	0	0	0	0	0	0.0244559	0	0	0	0	0	0	0	0.00271732
1701	Synergistetes	Synergistia	Synergistales	Synergistaceae	Synergistaceae_unclassified	0	0.0244559	0	0	0	0	0	0	0	0	0	0	0	0	0	0	0.0244559	0	0.00271732
1703	unknown	unknown_unclassified	unknown_unclassified	unknown_unclassified	unknown_unclassified	0	0.0244559	0	0	0	0	0	0	0	0	0.0244559	0	0	0	0	0	0	0	0.00271732
1285	Actinobacteria	Actinobacteria	Coriobacteriales	Coriobacteriaceae	Uncultured_10	0.0244559	0.0244559	0	0	0	0	0	0	0	0	0	0	0	0	0	0	0	0	0.00271732
1312	Bacteroidetes	Bacteroidia	Bacteroidales	Bacteroidaceae	Bacteroides	0.0244559	0.0244559	0	0	0	0	0	0	0	0	0	0	0	0	0	0	0	0	0.00271732
1320	Bacteroidetes	Bacteroidia	Bacteroidales	Bacteroidales_unclassified	Bacteroidales_unclassified	0	0.0244559	0	0	0	0	0	0	0	0	0	0.0244559	0	0	0	0	0	0	0.00271732
1336	Bacteroidetes	Bacteroidia	Bacteroidales	Bacteroidales_unclassified	Bacteroidales_unclassified	0	0	0	0	0	0	0	0.0244559	0	0	0	0	0.0244559	0	0	0	0	0	0.00271732
1338	Bacteroidetes	Bacteroidia	Bacteroidales	Bacteroidales_unclassified	Bacteroidales_unclassified	0.0244559	0.0244559	0	0	0	0	0	0	0	0	0	0	0	0	0	0	0	0	0.00271732
1427	Firmicutes	Clostridia_1	Clostridiales	Clostridiales_unclassified	Clostridiales_unclassified	0	0	0	0	0	0	0	0.0244559	0	0	0	0	0.0244559	0	0	0	0	0	0.00271732
1498	Firmicutes	Clostridia_1	Clostridiales	Ruminococcaceae	Gut_cluster_4	0.0244559	0.0244559	0	0	0	0	0	0	0	0	0	0	0	0	0	0	0	0	0.00271732
1523	Firmicutes	Clostridia_1	Clostridiales	Ruminococcaceae	Ruminococcaceae_unclassified	0	0.0244559	0	0	0	0	0	0	0	0	0	0.0244559	0	0	0	0	0	0	0.00271732
1568	Firmicutes	Clostridia_2	Clostridiales_1	Veillonellaceae	Uncultured_7	0.0244559	0.0244559	0	0	0	0	0	0	0	0	0	0	0	0	0	0	0	0	0.00271732
1576	Firmicutes	Firmicutes_unclassified	Firmicutes_unclassified	Firmicutes_unclassified	Firmicutes_unclassified	0	0	0	0	0	0	0	0.0244559	0	0	0	0	0.0244559	0	0	0	0	0	0.00271732
1598	Planctomycetes	Planctomycetacia	Planctomycetales	Planctomycetaceae	Gemmata	0	0	0	0	0	0	0	0.0244559	0	0	0	0	0.0244559	0	0	0	0	0	0.00271732
1609	Planctomycetes	Planctomycetacia	Planctomycetales	Planctomycetaceae	Planctomycetaceae_unclassified	0	0.0244559	0	0	0	0	0	0	0	0	0	0.0244559	0	0	0	0	0	0	0.00271732
1618	Planctomycetes	Planctomycetacia	Planctomycetales	Planctomycetaceae	Singulisphaera	0	0.0244559	0	0	0	0	0	0	0	0	0	0.0244559	0	0	0	0	0	0	0.00271732
1295	Actinobacteria	Actinobacteria	Micrococcales_3	Microbacteriaceae	Microbacteriaceae_unclassified	0	0	0	0	0	0	0	0	0	0	0.0244559	0	0.0244559	0	0	0	0	0	0.00271732
1360	Bacteroidetes	Bacteroidia	Bacteroidales	Porphyromonadaceae_3	Tannerella	0	0	0	0	0	0	0	0	0	0	0	0	0.0244559	0	0	0	0.0244559	0	0.00271732
1402	Firmicutes	Bacilli	Lactobacillales	Cockroach_cluster	Cockroach_cluster_unclassified	0	0	0	0	0	0	0	0	0	0	0	0	0.0244559	0	0	0	0.0244559	0	0.00271732
1422	Firmicutes	Clostridia_1	Clostridiales	Clostridiales_unclassified	Clostridiales_unclassified	0	0	0	0	0	0	0	0	0	0	0.0244559	0	0.0244559	0	0	0	0	0	0.00271732
1543	Firmicutes	Clostridia_1	Clostridiales	Ruminococcaceae	Ruminococcaceae_unclassified	0	0	0	0	0	0	0	0	0	0	0.0244559	0	0.0244559	0	0	0	0	0	0.00271732
1633	Proteobacteria	Alphaproteobacteria	Rhizobiales_1	Brucellaceae	Brucellaceae_unclassified	0	0	0	0	0	0	0	0	0	0	0	0	0.0244559	0	0	0	0.0244559	0	0.00271732
1638	Proteobacteria	Alphaproteobacteria	Rhodobacterales	Rhodobacteraceae_1	Rhodobacteraceae_1_unclassified	0	0	0	0	0	0	0	0	0	0	0.0244559	0	0.0244559	0	0	0	0	0	0.00271732
1679	Proteobacteria	Deltaproteobacteria	Desulfovibrionales	Desulfovibrionaceae	Gut_cluster_3	0	0	0	0	0	0	0	0	0	0	0.0244559	0	0.0244559	0	0	0	0	0	0.00271732
1314	Bacteroidetes	Bacteroidia	Bacteroidales	Bacteroidales_unclassified	Bacteroidales_unclassified	0	0	0	0.0244559	0	0	0	0	0	0	0	0	0.0244559	0	0	0	0	0	0.00271732
1328	Bacteroidetes	Bacteroidia	Bacteroidales	Bacteroidales_unclassified	Bacteroidales_unclassified	0	0	0	0.0244559	0	0	0	0	0	0	0	0	0.0244559	0	0	0	0	0	0.00271732
1330	Bacteroidetes	Bacteroidia	Bacteroidales	Bacteroidales_unclassified	Bacteroidales_unclassified	0	0	0	0	0.0244559	0	0	0	0	0	0	0	0.0244559	0	0	0	0	0	0.00271732
1416	Firmicutes	Bacilli	Lactobacillales	Leuconostocaceae	Weissella_1	0	0	0	0.0244559	0	0	0	0	0	0	0	0	0.0244559	0	0	0	0	0	0.00271732
1432	Firmicutes	Clostridia_1	Clostridiales	Clostridiales_unclassified	Clostridiales_unclassified	0	0	0	0	0.0244559	0	0	0	0	0	0	0	0.0244559	0	0	0	0	0	0.00271732
1491	Firmicutes	Clostridia_1	Clostridiales	Lachnospiraceae	Lachnospiraceae_unclassified	0	0	0	0	0.0244559	0	0	0	0	0	0	0	0.0244559	0	0	0	0	0	0.00271732
1669	Proteobacteria	Deltaproteobacteria	Desulfovibrionales	Desulfovibrionaceae	Gut_cluster_3	0	0	0	0.0244559	0	0	0	0	0	0	0	0	0.0244559	0	0	0	0	0	0.00271732
1395	Deferribacteres	Deferribacteres	Deferribacterales	Deferribacteraceae	Mucispirillum	0	0.0244559	0	0	0	0	0	0	0	0	0	0	0	0	0.0244559	0	0	0	0.00271732
1532	Firmicutes	Clostridia_1	Clostridiales	Ruminococcaceae	Ruminococcaceae_unclassified	0.0244559	0	0	0	0	0	0	0	0	0	0	0	0.0244559	0	0	0	0	0	0.00271732
1542	Firmicutes	Clostridia_1	Clostridiales	Ruminococcaceae	Ruminococcaceae_unclassified	0	0	0	0	0	0	0	0	0	0	0	0.0244559	0.0244559	0	0	0	0	0	0.00271732
1586	Firmicutes	Firmicutes_unclassified	Firmicutes_unclassified	Firmicutes_unclassified	Firmicutes_unclassified	0	0	0	0	0	0	0	0	0	0	0	0.0244559	0.0244559	0	0	0	0	0	0.00271732
1587	Firmicutes	Firmicutes_unclassified	Firmicutes_unclassified	Firmicutes_unclassified	Firmicutes_unclassified	0	0.0244559	0	0	0	0	0	0	0	0	0	0	0	0	0.0244559	0	0	0	0.00271732
1305	Bacteroidetes	Bacteroidetes_unclassified	Bacteroidetes_unclassified	Bacteroidetes_unclassified	Bacteroidetes_unclassified	0	0.0244559	0	0	0	0	0	0	0	0.0244559	0	0	0	0	0	0	0	0	0.00271732
1311	Bacteroidetes	Bacteroidia	Bacteroidales	Bacteroidaceae	Bacteroides	0	0	0	0	0	0	0	0.0489117	0	0	0	0	0	0	0	0	0	0	0.00271732
1364	Bacteroidetes	Bacteroidia	Bacteroidales	Porphyromonadaceae_3	Tannerella	0	0	0	0	0	0	0	0.0489117	0	0	0	0	0	0	0	0	0	0	0.00271732
1374	Bacteroidetes	Bacteroidia	Bacteroidales	Rikenellaceae	Alisitpes_IV	0	0	0	0	0	0	0	0.0489117	0	0	0	0	0	0	0	0	0	0	0.00271732
1445	Firmicutes	Clostridia_1	Clostridiales	Clostridiales_unclassified	Clostridiales_unclassified	0	0	0	0	0	0	0	0.0489117	0	0	0	0	0	0	0	0	0	0	0.00271732
1522	Firmicutes	Clostridia_1	Clostridiales	Ruminococcaceae	Ruminococcaceae_unclassified	0	0.0244559	0	0	0	0	0	0	0	0	0	0	0	0.0244559	0	0	0	0	0.00271732
1527	Firmicutes	Clostridia_1	Clostridiales	Ruminococcaceae	Ruminococcaceae_unclassified	0	0.0244559	0	0	0	0	0	0	0	0.0244559	0	0	0	0	0	0	0	0	0.00271732
1552	Firmicutes	Clostridia_1	Clostridiales	Ruminococcaceae	Termite_cockroach_cluster	0	0	0	0	0	0	0	0.0489117	0	0	0	0	0	0	0	0	0	0	0.00271732
1555	Firmicutes	Clostridia_1	Clostridiales	Ruminococcaceae	Termite_cockroach_cluster	0	0.0244559	0	0	0	0	0	0	0	0.0244559	0	0	0	0	0	0	0	0	0.00271732
1603	Planctomycetes	Planctomycetacia	Planctomycetales	Planctomycetaceae	Planctomyces_1	0	0.0244559	0	0	0	0	0	0	0	0	0	0	0	0.0244559	0	0	0	0	0.00271732
1688	Proteobacteria	Gammaproteobacteria_1	Pseudomonadales	Moraxellaceae	Acinetobacter	0	0	0	0	0	0	0	0.0489117	0	0	0	0	0	0	0	0	0	0	0.00271732
1616	Planctomycetes	Planctomycetacia	Planctomycetales	Planctomycetaceae	Planctomycetaceae_unclassified	0	0	0	0	0	0	0	0.0244559	0	0	0.0244559	0	0	0	0	0	0	0	0.00271732
1625	Planctomycetes	Planctomycetacia	Planctomycetales	Planctomycetaceae	Termite_cockroach_cluster_2	0	0	0	0	0	0	0	0.0244559	0	0	0.0244559	0	0	0	0	0	0	0	0.00271732
1627	Planctomycetes	Planctomycetacia	Planctomycetales	Planctomycetaceae	Uncultured_32	0	0	0	0	0	0	0	0.0244559	0	0	0.0244559	0	0	0	0	0	0	0	0.00271732
1647	Proteobacteria	Betaproteobacteria	Betaproteobacteria_unclassified	Betaproteobacteria_unclassified	Betaproteobacteria_unclassified	0	0	0	0	0	0	0	0.0244559	0	0	0	0	0	0	0	0	0.0244559	0	0.00271732
1661	Proteobacteria	Deltaproteobacteria	Desulfobacterales	Desulfobulbaceae	Desulfobulbus	0	0	0	0	0	0	0	0.0244559	0	0	0	0	0	0	0	0	0.0244559	0	0.00271732
1272	Actinobacteria	Actinobacteria	Acidimicrobiales	Acidimicrobiales_unclassified	Acidimicrobiales_unclassified	0	0	0	0	0	0	0	0	0	0	0.0244559	0	0	0	0	0	0.0244559	0	0.00271732
1283	Actinobacteria	Actinobacteria	Actinomycetales_1	Streptomycetaceae	Streptomycetaceae_unclassified	0	0	0	0	0	0	0	0	0	0	0	0	0	0	0	0	0.0489117	0	0.00271732
1292	Actinobacteria	Actinobacteria	Corynebacteriales	Nocardiaceae	Rhodococcus_1	0	0	0	0.0244559	0	0	0	0.0244559	0	0	0	0	0	0	0	0	0	0	0.00271732
1296	Actinobacteria	Actinobacteria	Micrococcales_4	Intrasporangiaceae_1	Intrasporangiaceae_1_unclassified	0	0	0	0	0	0	0	0	0	0	0	0	0	0	0	0	0.0489117	0	0.00271732
1316	Bacteroidetes	Bacteroidia	Bacteroidales	Bacteroidales_unclassified	Bacteroidales_unclassified	0	0	0	0	0	0	0	0	0	0	0.0244559	0	0	0	0	0	0.0244559	0	0.00271732
1339	Bacteroidetes	Bacteroidia	Bacteroidales	Bacteroidales_unclassified	Bacteroidales_unclassified	0	0	0	0	0.0244559	0	0	0	0	0	0	0	0	0	0	0	0.0244559	0	0.00271732
1351	Bacteroidetes	Bacteroidia	Bacteroidales	Porphyromonadaceae_2	Termite_cluster_2	0	0	0	0	0.0244559	0	0	0	0	0	0	0	0	0	0	0	0.0244559	0	0.00271732
1353	Bacteroidetes	Bacteroidia	Bacteroidales	Porphyromonadaceae_3	Porphyromonadaceae_3_unclassified	0	0	0	0	0.0244559	0	0	0.0244559	0	0	0	0	0	0	0	0	0	0	0.00271732
1368	Bacteroidetes	Bacteroidia	Bacteroidales	Porphyromonadaceae_Cluster_V	Porphyromonadaceae_Cluster_V_unclassified	0	0	0	0	0	0	0	0	0	0	0.0489117	0	0	0	0	0	0	0	0.00271732
1389	Candidate_phylum_BD1_5	Candidate_phylum_BD1_5_unclassified	Candidate_phylum_BD1_5_unclassified	Candidate_phylum_BD1_5_unclassified	Candidate_phylum_BD1_5_unclassified	0	0	0	0	0	0	0	0	0	0	0.0244559	0	0	0	0	0	0.0244559	0	0.00271732
1391	Candidate_phylum_TM7	Termite_cluster_1	Termite_cluster_1_unclassified	Termite_cluster_1_unclassified	Termite_cluster_1_unclassified	0	0	0	0.0244559	0	0	0	0.0244559	0	0	0	0	0	0	0	0	0	0	0.00271732
1399	Firmicutes	Bacilli	Bacilli_unclassified	Bacilli_unclassified	Bacilli_unclassified	0	0	0	0	0	0	0	0	0	0	0.0489117	0	0	0	0	0	0	0	0.00271732
1420	Firmicutes	Bacilli	Lactobacillales	Streptococcaceae	Lactovum	0	0	0	0	0	0	0	0	0	0	0.0244559	0	0	0	0	0	0.0244559	0	0.00271732
1424	Firmicutes	Clostridia_1	Clostridiales	Clostridiales_unclassified	Clostridiales_unclassified	0	0	0	0	0	0	0	0	0	0	0.0489117	0	0	0	0	0	0	0	0.00271732
1446	Firmicutes	Clostridia_1	Clostridiales	Clostridiales_unclassified	Clostridiales_unclassified	0	0	0	0	0	0	0	0	0	0	0.0244559	0	0	0	0	0	0.0244559	0	0.00271732
1456	Firmicutes	Clostridia_1	Clostridiales	Lachnospiraceae	Candidatus_Arthromitus	0	0.0244559	0	0	0	0	0.0244559	0	0	0	0	0	0	0	0	0	0	0	0.00271732
1506	Firmicutes	Clostridia_1	Clostridiales	Ruminococcaceae	Insect_cluster	0	0	0	0	0.0244559	0	0	0.0244559	0	0	0	0	0	0	0	0	0	0	0.00271732
1510	Firmicutes	Clostridia_1	Clostridiales	Ruminococcaceae	Ruminococcaceae_unclassified	0	0	0	0.0244559	0	0	0	0.0244559	0	0	0	0	0	0	0	0	0	0	0.00271732
1521	Firmicutes	Clostridia_1	Clostridiales	Ruminococcaceae	Ruminococcaceae_unclassified	0	0	0	0	0.0244559	0	0	0	0	0	0.0244559	0	0	0	0	0	0	0	0.00271732
1529	Firmicutes	Clostridia_1	Clostridiales	Ruminococcaceae	Ruminococcaceae_unclassified	0	0	0	0	0.0244559	0	0	0	0	0	0.0244559	0	0	0	0	0	0	0	0.00271732
1539	Firmicutes	Clostridia_1	Clostridiales	Ruminococcaceae	Ruminococcaceae_unclassified	0	0	0	0	0	0	0	0	0	0	0	0	0.0244559	0	0.0244559	0	0	0	0.00271732
1546	Firmicutes	Clostridia_1	Clostridiales	Ruminococcaceae	Ruminococcaceae_unclassified	0	0	0	0	0	0	0	0	0	0	0.0244559	0	0	0	0	0	0.0244559	0	0.00271732
1549	Firmicutes	Clostridia_1	Clostridiales	Ruminococcaceae	Termite_cockroach_cluster	0	0	0	0	0.0244559	0	0	0	0	0	0.0244559	0	0	0	0	0	0	0	0.00271732
1558	Firmicutes	Clostridia_1	Clostridiales	Ruminococcaceae	Termite_cockroach_cluster	0	0	0	0	0	0	0	0	0	0	0	0	0.0244559	0	0.0244559	0	0	0	0.00271732
1567	Firmicutes	Clostridia_2	Clostridiales_1	Veillonellaceae	Uncultured_7	0	0	0	0	0	0	0	0	0	0	0	0	0	0	0	0	0.0489117	0	0.00271732
1570	Firmicutes	Clostridia_2	Clostridiales_1	Veillonellaceae	Uncultured_8	0	0	0	0.0244559	0	0	0	0	0	0	0.0244559	0	0	0	0	0	0	0	0.00271732
1582	Firmicutes	Firmicutes_unclassified	Firmicutes_unclassified	Firmicutes_unclassified	Firmicutes_unclassified	0	0	0	0	0	0	0	0	0	0	0	0	0.0244559	0	0.0244559	0	0	0	0.00271732
1584	Firmicutes	Firmicutes_unclassified	Firmicutes_unclassified	Firmicutes_unclassified	Firmicutes_unclassified	0	0	0	0	0	0	0	0	0	0	0	0	0.0244559	0	0.0244559	0	0	0	0.00271732
1592	Firmicutes	Firmicutes_unclassified	Firmicutes_unclassified	Firmicutes_unclassified	Firmicutes_unclassified	0	0	0	0	0	0	0	0	0	0	0.0489117	0	0	0	0	0	0	0	0.00271732
1593	Firmicutes	Firmicutes_unclassified	Firmicutes_unclassified	Firmicutes_unclassified	Firmicutes_unclassified	0	0	0	0	0	0	0	0	0	0	0.0489117	0	0	0	0	0	0	0	0.00271732
1604	Planctomycetes	Planctomycetacia	Planctomycetales	Planctomycetaceae	Planctomyces_1	0	0	0	0	0	0	0	0	0	0	0	0	0	0	0	0	0.0489117	0	0.00271732
1630	Planctomycetes	vadinHA49	Insect_cluster	Insect_cluster_unclassified	Insect_cluster_unclassified	0	0	0	0.0244559	0	0	0	0.0244559	0	0	0	0	0	0	0	0	0	0	0.00271732
1660	Proteobacteria	Deltaproteobacteria	Desulfobacterales	Desulfobacteraceae	Desulfobacteraceae_unclassified	0	0	0	0	0	0	0	0	0	0	0	0	0	0	0	0	0.0489117	0	0.00271732
1673	Proteobacteria	Deltaproteobacteria	Desulfovibrionales	Desulfovibrionaceae	Gut_cluster_3	0	0	0	0	0.0244559	0	0	0.0244559	0	0	0	0	0	0	0	0	0	0	0.00271732
1676	Proteobacteria	Deltaproteobacteria	Desulfovibrionales	Desulfovibrionaceae	Gut_cluster_3	0	0.0244559	0	0	0	0	0.0244559	0	0	0	0	0	0	0	0	0	0	0	0.00271732
1682	Proteobacteria	Deltaproteobacteria	Myxococcales	Polyangiaceae	Sorangium_2	0	0	0	0	0	0	0	0	0	0	0.0489117	0	0	0	0	0	0	0	0.00271732
1699	Synergistetes	Synergistia	Synergistales	Synergistaceae	Oral_cluster	0	0	0	0	0	0	0	0	0	0	0.0489117	0	0	0	0	0	0	0	0.00271732
878	Actinobacteria	Actinobacteria	Actinomycetales	Actinomycetaceae_2	Actinobaculum	0.0244559	0	0	0	0	0	0	0	0	0	0.0244559	0	0	0	0	0	0	0	0.00271732
1276	Actinobacteria	Actinobacteria	Actinobacteria_unclassified	Actinobacteria_unclassified	Actinobacteria_unclassified	0.0244559	0	0	0	0	0	0	0	0	0	0.0244559	0	0	0	0	0	0	0	0.00271732
1277	Actinobacteria	Actinobacteria	Actinobacteria_unclassified	Actinobacteria_unclassified	Actinobacteria_unclassified	0	0	0	0	0	0	0	0	0	0.0244559	0	0	0.0244559	0	0	0	0	0	0.00271732
1280	Actinobacteria	Actinobacteria	Actinomycetales	Actinomycetaceae_2	Actinomyces_2	0	0	0	0	0	0	0	0.0244559	0	0	0	0.0244559	0	0	0	0	0	0	0.00271732
1282	Actinobacteria	Actinobacteria	Actinomycetales	Actinomycetales_unclassified	Actinomycetales_unclassified	0	0	0	0	0	0	0	0	0	0.0244559	0	0	0.0244559	0	0	0	0	0	0.00271732
1297	Actinobacteria	Actinobacteria	Micromonosporales	Micromonosporaceae	Asanoa	0.0244559	0	0	0.0244559	0	0	0	0	0	0	0	0	0	0	0	0	0	0	0.00271732
1302	Actinobacteria	Actinobacteria	Solirubrobacterales	Solirubrobacterales_unclassified	Solirubrobacterales_unclassified	0.0244559	0	0	0	0.0244559	0	0	0	0	0	0	0	0	0	0	0	0	0	0.00271732
1310	Bacteroidetes	Bacteroidetes_unclassified	Bacteroidetes_unclassified	Bacteroidetes_unclassified	Bacteroidetes_unclassified	0	0	0	0	0	0	0	0	0	0	0.0244559	0.0244559	0	0	0	0	0	0	0.00271732
1319	Bacteroidetes	Bacteroidia	Bacteroidales	Bacteroidales_unclassified	Bacteroidales_unclassified	0	0	0	0	0	0	0	0	0	0	0	0.0244559	0	0	0	0	0.0244559	0	0.00271732
1349	Bacteroidetes	Bacteroidia	Bacteroidales	Porphyromonadaceae_2	Porphyromonadaceae_2_unclassified	0	0	0	0	0.0244559	0	0	0	0	0	0	0.0244559	0	0	0	0	0	0	0.00271732
1357	Bacteroidetes	Bacteroidia	Bacteroidales	Porphyromonadaceae_3	Porphyromonadaceae_3_unclassified	0	0	0	0	0	0	0	0.0244559	0	0	0	0.0244559	0	0	0	0	0	0	0.00271732
1367	Bacteroidetes	Bacteroidia	Bacteroidales	Porphyromonadaceae_Cluster_V	Porphyromonadaceae_Cluster_V_unclassified	0.0244559	0	0	0	0.0244559	0	0	0	0	0	0	0	0	0	0	0	0	0	0.00271732
1376	Bacteroidetes	Bacteroidia	Bacteroidales	Rikenellaceae	Alisitpes_IV	0	0	0	0	0.0244559	0	0	0	0	0	0	0.0244559	0	0	0	0	0	0	0.00271732
1379	Bacteroidetes	Bacteroidia	Bacteroidales	Rikenellaceae	Alisitpes_IV	0.0244559	0	0	0	0	0	0	0	0	0	0	0	0	0	0	0	0.0244559	0	0.00271732
1380	Bacteroidetes	Bacteroidia	Bacteroidales	Rikenellaceae	Alistipes_III	0.0244559	0	0	0.0244559	0	0	0	0	0	0	0	0	0	0	0	0	0	0	0.00271732
1381	Bacteroidetes	Bacteroidia	Bacteroidales	Rikenellaceae	Rikenellaceae_unclassified	0.0244559	0	0	0	0.0244559	0	0	0	0	0	0	0	0	0	0	0	0	0	0.00271732
1390	Candidate_phylum_TM7	Candidate_phylum_TM7_unclassified	Candidate_phylum_TM7_unclassified	Candidate_phylum_TM7_unclassified	Candidate_phylum_TM7_unclassified	0	0	0	0.0489117	0	0	0	0	0	0	0	0	0	0	0	0	0	0	0.00271732
1397	Firmicutes	Bacilli	Bacillales	Bacillaceae	Bacillus_4	0	0	0	0	0	0	0	0.0244559	0	0	0	0.0244559	0	0	0	0	0	0	0.00271732
1403	Firmicutes	Bacilli	Lactobacillales	Lactobacillales_unclassified	Lactobacillales_unclassified	0.0244559	0	0	0	0.0244559	0	0	0	0	0	0	0	0	0	0	0	0	0	0.00271732
1415	Firmicutes	Bacilli	Lactobacillales	Leuconostocaceae	Weissella_1	0	0	0	0.0489117	0	0	0	0	0	0	0	0	0	0	0	0	0	0	0.00271732
1423	Firmicutes	Clostridia_1	Clostridiales	Clostridiales_unclassified	Clostridiales_unclassified	0	0	0	0	0	0	0	0	0	0	0	0	0.0244559	0.0244559	0	0	0	0	0.00271732
1461	Firmicutes	Clostridia_1	Clostridiales	Lachnospiraceae	Gut_cluster_13	0.0244559	0	0	0	0	0	0	0.0244559	0	0	0	0	0	0	0	0	0	0	0.00271732
1466	Firmicutes	Clostridia_1	Clostridiales	Lachnospiraceae	Gut_cluster_13	0.0244559	0	0	0	0	0	0	0	0	0	0.0244559	0	0	0	0	0	0	0	0.00271732
1482	Firmicutes	Clostridia_1	Clostridiales	Lachnospiraceae	Lachnospiraceae_unclassified	0.0244559	0	0	0	0	0	0	0	0	0	0.0244559	0	0	0	0	0	0	0	0.00271732
1486	Firmicutes	Clostridia_1	Clostridiales	Lachnospiraceae	Lachnospiraceae_unclassified	0.0244559	0	0	0	0	0	0	0.0244559	0	0	0	0	0	0	0	0	0	0	0.00271732
1499	Firmicutes	Clostridia_1	Clostridiales	Ruminococcaceae	Gut_cluster_4	0	0	0	0	0.0489117	0	0	0	0	0	0	0	0	0	0	0	0	0	0.00271732
1504	Firmicutes	Clostridia_1	Clostridiales	Ruminococcaceae	Gut_cluster_7	0	0	0	0	0	0	0	0	0	0	0.0244559	0.0244559	0	0	0	0	0	0	0.00271732
1507	Firmicutes	Clostridia_1	Clostridiales	Ruminococcaceae	Insect_cluster	0.0244559	0	0	0	0.0244559	0	0	0	0	0	0	0	0	0	0	0	0	0	0.00271732
1509	Firmicutes	Clostridia_1	Clostridiales	Ruminococcaceae	Insect_cluster	0.0244559	0	0	0	0	0	0	0	0	0	0.0244559	0	0	0	0	0	0	0	0.00271732
1554	Firmicutes	Clostridia_1	Clostridiales	Ruminococcaceae	Termite_cockroach_cluster	0.0244559	0	0	0	0	0	0	0	0	0	0	0	0	0	0	0	0.0244559	0	0.00271732
1569	Firmicutes	Clostridia_2	Clostridiales_1	Veillonellaceae	Uncultured_8	0.0244559	0	0	0	0	0	0	0	0	0	0.0244559	0	0	0	0	0	0	0	0.00271732
1583	Firmicutes	Firmicutes_unclassified	Firmicutes_unclassified	Firmicutes_unclassified	Firmicutes_unclassified	0	0	0	0.0489117	0	0	0	0	0	0	0	0	0	0	0	0	0	0	0.00271732
1597	Planctomycetes	Planctomycetacia	Planctomycetales	Planctomycetaceae	Blastopirellula	0	0	0	0	0	0	0	0	0	0	0	0	0.0244559	0.0244559	0	0	0	0	0.00271732
1599	Planctomycetes	Planctomycetacia	Planctomycetales	Planctomycetaceae	Gemmata	0	0	0	0.0489117	0	0	0	0	0	0	0	0	0	0	0	0	0	0	0.00271732
1612	Planctomycetes	Planctomycetacia	Planctomycetales	Planctomycetaceae	Planctomycetaceae_unclassified	0	0	0	0	0	0	0	0.0244559	0	0	0	0.0244559	0	0	0	0	0	0	0.00271732
1613	Planctomycetes	Planctomycetacia	Planctomycetales	Planctomycetaceae	Planctomycetaceae_unclassified	0.0244559	0	0	0	0	0	0	0	0	0	0.0244559	0	0	0	0	0	0	0	0.00271732
1614	Planctomycetes	Planctomycetacia	Planctomycetales	Planctomycetaceae	Planctomycetaceae_unclassified	0	0	0	0.0244559	0.0244559	0	0	0	0	0	0	0	0	0	0	0	0	0	0.00271732
1635	Proteobacteria	Alphaproteobacteria	Rhizobiales_2	Rhizobiales_2_unclassified	Rhizobiales_2_unclassified	0.0244559	0	0	0	0	0	0	0	0	0	0	0	0	0	0	0	0.0244559	0	0.00271732
1655	Proteobacteria	Deltaproteobacteria	Desulfarculales	Desulfarculaceae	Desulfarculus	0.0244559	0	0	0	0.0244559	0	0	0	0	0	0	0	0	0	0	0	0	0	0.00271732
1662	Proteobacteria	Deltaproteobacteria	Desulfovibrionales	Desulfovibrionaceae	Desulfovibrionaceae_unclassified	0.0244559	0	0	0	0	0	0	0.0244559	0	0	0	0	0	0	0	0	0	0	0.00271732
1663	Proteobacteria	Deltaproteobacteria	Desulfovibrionales	Desulfovibrionaceae	Gut_cluster_3	0	0	0	0	0.0489117	0	0	0	0	0	0	0	0	0	0	0	0	0	0.00271732
1670	Proteobacteria	Deltaproteobacteria	Desulfovibrionales	Desulfovibrionaceae	Gut_cluster_3	0.0244559	0	0	0	0	0	0	0.0244559	0	0	0	0	0	0	0	0	0	0	0.00271732
1674	Proteobacteria	Deltaproteobacteria	Desulfovibrionales	Desulfovibrionaceae	Gut_cluster_3	0	0	0	0	0.0489117	0	0	0	0	0	0	0	0	0	0	0	0	0	0.00271732
1684	Proteobacteria	Deltaproteobacteria	Rs-K70	Rs-K70_unclassified	Rs-K70_unclassified	0	0	0	0	0	0	0	0	0	0	0.0244559	0.0244559	0	0	0	0	0	0	0.00271732
1686	Proteobacteria	Gammaproteobacteria_1	Enterobacteriales	Enterobacteriaceae	Enterobacteriaceae_unclassified	0	0	0	0	0	0	0	0	0	0	0.0244559	0.0244559	0	0	0	0	0	0	0.00271732
1704	unknown	unknown_unclassified	unknown_unclassified	unknown_unclassified	unknown_unclassified	0.0244559	0	0	0	0.0244559	0	0	0	0	0	0	0	0	0	0	0	0	0	0.00271732
1306	Bacteroidetes	Bacteroidetes_unclassified	Bacteroidetes_unclassified	Bacteroidetes_unclassified	Bacteroidetes_unclassified	0	0	0	0	0	0	0	0	0	0	0	0.0489117	0	0	0	0	0	0	0.00271732
1308	Bacteroidetes	Bacteroidetes_unclassified	Bacteroidetes_unclassified	Bacteroidetes_unclassified	Bacteroidetes_unclassified	0	0	0	0	0	0	0.0244559	0	0	0	0	0	0.0244559	0	0	0	0	0	0.00271732
1309	Bacteroidetes	Bacteroidetes_unclassified	Bacteroidetes_unclassified	Bacteroidetes_unclassified	Bacteroidetes_unclassified	0	0	0	0	0	0	0	0	0	0	0	0.0489117	0	0	0	0	0	0	0.00271732
1337	Bacteroidetes	Bacteroidia	Bacteroidales	Bacteroidales_unclassified	Bacteroidales_unclassified	0	0.0244559	0	0	0	0.0244559	0	0	0	0	0	0	0	0	0	0	0	0	0.00271732
1382	Bacteroidetes	Bacteroidia	Bacteroidales	Rikenellaceae	Rikenellaceae_unclassified	0.0244559	0	0	0	0	0	0	0	0	0	0	0.0244559	0	0	0	0	0	0	0.00271732
1471	Firmicutes	Clostridia_1	Clostridiales	Lachnospiraceae	Gut_cluster_14	0.0244559	0	0	0	0	0	0	0	0	0	0	0.0244559	0	0	0	0	0	0	0.00271732
1500	Firmicutes	Clostridia_1	Clostridiales	Ruminococcaceae	Gut_cluster_5	0.0489117	0	0	0	0	0	0	0	0	0	0	0	0	0	0	0	0	0	0.00271732
1502	Firmicutes	Clostridia_1	Clostridiales	Ruminococcaceae	Gut_cluster_7	0	0	0	0	0	0	0.0244559	0	0	0	0	0	0.0244559	0	0	0	0	0	0.00271732
1508	Firmicutes	Clostridia_1	Clostridiales	Ruminococcaceae	Insect_cluster	0.0244559	0	0	0	0	0	0	0	0	0	0	0.0244559	0	0	0	0	0	0	0.00271732
1515	Firmicutes	Clostridia_1	Clostridiales	Ruminococcaceae	Ruminococcaceae_unclassified	0	0	0	0	0	0	0.0244559	0	0	0	0	0	0.0244559	0	0	0	0	0	0.00271732
1518	Firmicutes	Clostridia_1	Clostridiales	Ruminococcaceae	Ruminococcaceae_unclassified	0	0	0	0	0	0	0	0.0244559	0	0	0	0	0	0	0.0244559	0	0	0	0.00271732
1531	Firmicutes	Clostridia_1	Clostridiales	Ruminococcaceae	Ruminococcaceae_unclassified	0.0489117	0	0	0	0	0	0	0	0	0	0	0	0	0	0	0	0	0	0.00271732
1562	Firmicutes	Clostridia_1	Clostridiales	Ruminococcaceae	Termite_cockroach_cluster	0	0	0	0	0	0	0.0244559	0	0	0	0	0	0.0244559	0	0	0	0	0	0.00271732
1563	Firmicutes	Clostridia_1	Clostridiales	Ruminococcaceae	Uncultured_12	0	0	0	0	0	0	0.0244559	0	0	0	0	0	0.0244559	0	0	0	0	0	0.00271732
1605	Planctomycetes	Planctomycetacia	Planctomycetales	Planctomycetaceae	Planctomycetaceae_unclassified	0.0244559	0	0	0	0	0	0	0	0	0	0	0.0244559	0	0	0	0	0	0	0.00271732
1608	Planctomycetes	Planctomycetacia	Planctomycetales	Planctomycetaceae	Planctomycetaceae_unclassified	0	0	0	0	0	0	0	0	0	0	0	0.0489117	0	0	0	0	0	0	0.00271732
1317	Bacteroidetes	Bacteroidia	Bacteroidales	Bacteroidales_unclassified	Bacteroidales_unclassified	0	0	0	0	0	0	0	0	0	0	0	0	0	0	0.0244559	0	0.0244559	0	0.00271732
1331	Bacteroidetes	Bacteroidia	Bacteroidales	Bacteroidales_unclassified	Bacteroidales_unclassified	0	0	0	0	0	0	0	0	0	0	0	0	0	0	0.0244559	0	0.0244559	0	0.00271732
1342	Bacteroidetes	Bacteroidia	Bacteroidales	Bacteroidales_unclassified	Bacteroidales_unclassified	0	0	0	0.0244559	0	0	0	0	0	0	0	0	0	0	0.0244559	0	0	0	0.00271732
1346	Bacteroidetes	Bacteroidia	Bacteroidales	Porphyromonadaceae	Porphyromonas	0	0	0	0	0	0	0	0.0244559	0	0	0	0	0	0.0244559	0	0	0	0	0.00271732
1348	Bacteroidetes	Bacteroidia	Bacteroidales	Porphyromonadaceae_2	Paludibacter	0	0	0	0	0	0	0	0.0244559	0	0	0	0	0	0.0244559	0	0	0	0	0.00271732
1369	Bacteroidetes	Bacteroidia	Bacteroidales	Porphyromonadaceae_Cluster_V	Porphyromonadaceae_Cluster_V_unclassified	0	0	0	0.0244559	0	0	0	0	0	0	0	0	0	0	0.0244559	0	0	0	0.00271732
1396	Elusimicrobia	Elusimicrobia	Elusimicrobiales	Lineage_III	Lineage_III_unclassified	0	0	0	0	0	0	0	0.0244559	0	0.0244559	0	0	0	0	0	0	0	0	0.00271732
1428	Firmicutes	Clostridia_1	Clostridiales	Clostridiales_unclassified	Clostridiales_unclassified	0	0	0	0.0244559	0	0	0	0	0	0	0	0	0	0	0.0244559	0	0	0	0.00271732
1455	Firmicutes	Clostridia_1	Clostridiales	Family_XIII_Incertae_Sedis	Termite_cockroach_cluster_1	0	0	0	0	0	0	0	0	0	0	0.0244559	0	0	0	0.0244559	0	0	0	0.00271732
1462	Firmicutes	Clostridia_1	Clostridiales	Lachnospiraceae	Gut_cluster_13	0	0	0	0	0.0244559	0	0	0	0	0	0	0	0	0	0.0244559	0	0	0	0.00271732
1476	Firmicutes	Clostridia_1	Clostridiales	Lachnospiraceae	Lachnospiraceae_unclassified	0	0	0	0	0	0	0	0.0244559	0	0.0244559	0	0	0	0	0	0	0	0	0.00271732
1478	Firmicutes	Clostridia_1	Clostridiales	Lachnospiraceae	Lachnospiraceae_unclassified	0	0	0	0	0	0	0	0	0	0	0.0244559	0	0	0	0.0244559	0	0	0	0.00271732
1487	Firmicutes	Clostridia_1	Clostridiales	Lachnospiraceae	Lachnospiraceae_unclassified	0	0	0	0	0.0244559	0	0	0	0	0	0	0	0	0	0.0244559	0	0	0	0.00271732
1520	Firmicutes	Clostridia_1	Clostridiales	Ruminococcaceae	Ruminococcaceae_unclassified	0	0	0	0	0	0	0	0	0	0	0	0	0	0	0.0244559	0	0.0244559	0	0.00271732
1530	Firmicutes	Clostridia_1	Clostridiales	Ruminococcaceae	Ruminococcaceae_unclassified	0	0	0	0	0	0	0	0	0	0	0.0244559	0	0	0	0.0244559	0	0	0	0.00271732
1556	Firmicutes	Clostridia_1	Clostridiales	Ruminococcaceae	Termite_cockroach_cluster	0	0	0	0	0	0	0	0.0244559	0	0	0	0	0	0.0244559	0	0	0	0	0.00271732
1666	Proteobacteria	Deltaproteobacteria	Desulfovibrionales	Desulfovibrionaceae	Gut_cluster_3	0	0	0	0	0.0244559	0	0	0	0	0	0	0	0	0	0.0244559	0	0	0	0.00271732
1333	Bacteroidetes	Bacteroidia	Bacteroidales	Bacteroidales_unclassified	Bacteroidales_unclassified	0	0	0	0	0	0	0	0	0	0	0	0	0	0.0244559	0	0	0.0244559	0	0.00271732
1388	Bacteroidetes	Sphingobacteria	Sphingobacteriales_1	Sphingobacteriales_1_unclassified	Sphingobacteriales_1_unclassified	0	0	0	0	0	0	0	0	0	0	0	0	0	0.0244559	0	0	0.0244559	0	0.00271732
1392	Chloroflexi	Thermomicrobia	JG30-KF-CM45	JG30-KF-CM45_unclassified	JG30-KF-CM45_unclassified	0	0	0	0	0	0	0	0	0	0.0244559	0.0244559	0	0	0	0	0	0	0	0.00271732
1407	Firmicutes	Bacilli	Lactobacillales	Lactobacillales_unclassified	Lactobacillales_unclassified	0	0	0	0	0	0	0	0	0	0	0.0244559	0	0	0.0244559	0	0	0	0	0.00271732
1434	Firmicutes	Clostridia_1	Clostridiales	Clostridiales_unclassified	Clostridiales_unclassified	0	0	0	0	0	0	0	0	0	0	0.0244559	0	0	0.0244559	0	0	0	0	0.00271732
1440	Firmicutes	Clostridia_1	Clostridiales	Clostridiales_unclassified	Clostridiales_unclassified	0	0	0	0	0	0	0	0	0	0	0.0244559	0	0	0.0244559	0	0	0	0	0.00271732
1441	Firmicutes	Clostridia_1	Clostridiales	Clostridiales_unclassified	Clostridiales_unclassified	0	0	0	0	0	0	0	0	0	0.0244559	0.0244559	0	0	0	0	0	0	0	0.00271732
1453	Firmicutes	Clostridia_1	Clostridiales	Family_XIII_Incertae_Sedis	Family_XIII_Incertae_Sedis_unclassified	0	0	0	0	0	0	0	0	0	0.0244559	0.0244559	0	0	0	0	0	0	0	0.00271732
1468	Firmicutes	Clostridia_1	Clostridiales	Lachnospiraceae	Gut_cluster_13	0	0	0	0	0	0	0	0	0	0	0	0	0	0.0244559	0	0	0.0244559	0	0.00271732
1473	Firmicutes	Clostridia_1	Clostridiales	Lachnospiraceae	Lachnospiraceae_unclassified	0	0	0	0	0	0	0	0	0	0.0244559	0	0	0	0	0	0	0.0244559	0	0.00271732
1481	Firmicutes	Clostridia_1	Clostridiales	Lachnospiraceae	Lachnospiraceae_unclassified	0	0	0	0	0	0	0	0	0	0	0.0244559	0	0	0.0244559	0	0	0	0	0.00271732
1493	Firmicutes	Clostridia_1	Clostridiales	Peptostreptococcaceae	Uncultured_3	0	0	0	0	0	0	0	0	0	0.0244559	0	0	0	0	0	0	0.0244559	0	0.00271732
1534	Firmicutes	Clostridia_1	Clostridiales	Ruminococcaceae	Ruminococcaceae_unclassified	0	0	0	0	0	0	0	0	0	0	0	0	0	0.0244559	0	0	0.0244559	0	0.00271732
1589	Firmicutes	Firmicutes_unclassified	Firmicutes_unclassified	Firmicutes_unclassified	Firmicutes_unclassified	0	0	0	0	0	0	0	0	0	0.0244559	0.0244559	0	0	0	0	0	0	0	0.00271732
1615	Planctomycetes	Planctomycetacia	Planctomycetales	Planctomycetaceae	Planctomycetaceae_unclassified	0	0	0	0	0	0	0	0	0	0.0244559	0.0244559	0	0	0	0	0	0	0	0.00271732
1659	Proteobacteria	Deltaproteobacteria	Desulfobacterales	Desulfobacteraceae	Desulfobacteraceae_unclassified	0	0	0	0	0	0	0	0	0	0.0244559	0	0	0	0	0	0	0.0244559	0	0.00271732
868	Verrucomicrobia	Acidimethylosilex	Acidimethylosilex_unclassified	Acidimethylosilex_unclassified	Acidimethylosilex_unclassified	0	0	0	0	0	0	0.0244559	0	0	0	0.0244559	0	0	0	0	0	0	0	0.00271732
1281	Actinobacteria	Actinobacteria	Actinomycetales	Actinomycetaceae_2	Actinomycetaceae_2_unclassified	0	0	0	0	0	0	0.0244559	0.0244559	0	0	0	0	0	0	0	0	0	0	0.00271732
1329	Bacteroidetes	Bacteroidia	Bacteroidales	Bacteroidales_unclassified	Bacteroidales_unclassified	0	0	0	0	0.0244559	0	0	0	0	0.0244559	0	0	0	0	0	0	0	0	0.00271732
1340	Bacteroidetes	Bacteroidia	Bacteroidales	Bacteroidales_unclassified	Bacteroidales_unclassified	0	0	0	0.0244559	0	0	0	0	0	0	0	0	0	0.0244559	0	0	0	0	0.00271732
1352	Bacteroidetes	Bacteroidia	Bacteroidales	Porphyromonadaceae_3	Porphyromonadaceae_3_unclassified	0	0	0	0	0	0	0	0	0	0	0	0.0244559	0	0	0.0244559	0	0	0	0.00271732
1355	Bacteroidetes	Bacteroidia	Bacteroidales	Porphyromonadaceae_3	Porphyromonadaceae_3_unclassified	0	0	0	0	0	0	0.0244559	0.0244559	0	0	0	0	0	0	0	0	0	0	0.00271732
1401	Firmicutes	Bacilli	Bacilli_unclassified	Bacilli_unclassified	Bacilli_unclassified	0	0	0	0	0	0	0.0244559	0.0244559	0	0	0	0	0	0	0	0	0	0	0.00271732
1404	Firmicutes	Bacilli	Lactobacillales	Lactobacillales_unclassified	Lactobacillales_unclassified	0	0	0	0	0	0	0	0	0	0	0	0.0244559	0	0	0.0244559	0	0	0	0.00271732
1410	Firmicutes	Bacilli	Lactobacillales	Lactobacillales_unclassified	Lactobacillales_unclassified	0	0	0	0.0244559	0	0	0	0	0	0	0	0	0	0.0244559	0	0	0	0	0.00271732
1429	Firmicutes	Clostridia_1	Clostridiales	Clostridiales_unclassified	Clostridiales_unclassified	0	0	0	0	0	0	0.0244559	0.0244559	0	0	0	0	0	0	0	0	0	0	0.00271732
1435	Firmicutes	Clostridia_1	Clostridiales	Clostridiales_unclassified	Clostridiales_unclassified	0	0	0	0	0	0	0	0	0	0	0	0.0244559	0	0	0.0244559	0	0	0	0.00271732
1437	Firmicutes	Clostridia_1	Clostridiales	Clostridiales_unclassified	Clostridiales_unclassified	0	0	0	0	0	0	0.0244559	0	0	0	0	0	0	0	0	0	0.0244559	0	0.00271732
1443	Firmicutes	Clostridia_1	Clostridiales	Clostridiales_unclassified	Clostridiales_unclassified	0	0	0	0	0.0244559	0	0	0	0	0.0244559	0	0	0	0	0	0	0	0	0.00271732
1459	Firmicutes	Clostridia_1	Clostridiales	Lachnospiraceae	Gut_cluster_13	0	0	0	0	0.0244559	0	0	0	0	0.0244559	0	0	0	0	0	0	0	0	0.00271732
1480	Firmicutes	Clostridia_1	Clostridiales	Lachnospiraceae	Lachnospiraceae_unclassified	0	0	0	0	0	0	0	0	0	0	0	0.0244559	0	0	0.0244559	0	0	0	0.00271732
1494	Firmicutes	Clostridia_1	Clostridiales	Ruminococcaceae	Gut_cluster_1	0	0	0	0.0244559	0	0	0	0	0	0.0244559	0	0	0	0	0	0	0	0	0.00271732
1497	Firmicutes	Clostridia_1	Clostridiales	Ruminococcaceae	Gut_cluster_4	0	0	0	0	0	0.0244559	0	0	0	0	0	0	0.0244559	0	0	0	0	0	0.00271732
1501	Firmicutes	Clostridia_1	Clostridiales	Ruminococcaceae	Gut_cluster_7	0	0	0	0.0244559	0	0	0	0	0	0	0	0	0	0.0244559	0	0	0	0	0.00271732
1528	Firmicutes	Clostridia_1	Clostridiales	Ruminococcaceae	Ruminococcaceae_unclassified	0	0	0	0.0244559	0	0	0	0	0	0	0	0	0	0.0244559	0	0	0	0	0.00271732
1537	Firmicutes	Clostridia_1	Clostridiales	Ruminococcaceae	Ruminococcaceae_unclassified	0	0	0	0.0244559	0	0	0	0	0	0.0244559	0	0	0	0	0	0	0	0	0.00271732
1538	Firmicutes	Clostridia_1	Clostridiales	Ruminococcaceae	Ruminococcaceae_unclassified	0	0	0	0.0244559	0	0	0	0	0	0.0244559	0	0	0	0	0	0	0	0	0.00271732
1579	Firmicutes	Firmicutes_unclassified	Firmicutes_unclassified	Firmicutes_unclassified	Firmicutes_unclassified	0	0	0	0	0	0	0.0244559	0	0	0	0	0	0	0	0	0	0.0244559	0	0.00271732
1581	Firmicutes	Firmicutes_unclassified	Firmicutes_unclassified	Firmicutes_unclassified	Firmicutes_unclassified	0	0	0	0	0	0.0244559	0	0	0	0	0	0	0.0244559	0	0	0	0	0	0.00271732
1590	Firmicutes	Firmicutes_unclassified	Firmicutes_unclassified	Firmicutes_unclassified	Firmicutes_unclassified	0	0	0	0	0.0244559	0	0	0	0	0	0	0	0	0.0244559	0	0	0	0	0.00271732
1606	Planctomycetes	Planctomycetacia	Planctomycetales	Planctomycetaceae	Planctomycetaceae_unclassified	0	0	0	0	0	0	0.0244559	0	0	0	0	0	0	0	0	0	0.0244559	0	0.00271732
1610	Planctomycetes	Planctomycetacia	Planctomycetales	Planctomycetaceae	Planctomycetaceae_unclassified	0	0	0	0	0.0244559	0	0	0	0	0	0	0	0	0.0244559	0	0	0	0	0.00271732
1620	Planctomycetes	Planctomycetacia	Planctomycetales	Planctomycetaceae	Termite_cockroach_cluster_1	0	0	0	0.0244559	0	0	0	0	0	0.0244559	0	0	0	0	0	0	0	0	0.00271732
1624	Planctomycetes	Planctomycetacia	Planctomycetales	Planctomycetaceae	Termite_cockroach_cluster_2	0	0	0	0	0	0	0	0	0	0	0	0.0244559	0	0	0.0244559	0	0	0	0.00271732
1697	Synergistetes	Synergistia	Synergistales	Synergistaceae	Candidatus_Tammella	0	0	0	0	0	0	0.0244559	0	0	0	0.0244559	0	0	0	0	0	0	0	0.00271732
1279	Actinobacteria	Actinobacteria	Actinobacteria_unclassified	Actinobacteria_unclassified	Actinobacteria_unclassified	0.0244559	0	0	0	0	0	0	0	0	0.0244559	0	0	0	0	0	0	0	0	0.00271732
1354	Bacteroidetes	Bacteroidia	Bacteroidales	Porphyromonadaceae_3	Porphyromonadaceae_3_unclassified	0	0	0	0	0	0	0	0	0	0	0	0.0244559	0	0.0244559	0	0	0	0	0.00271732
1373	Bacteroidetes	Bacteroidia	Bacteroidales	Rikenellaceae	Alisitpes_IV	0.0244559	0	0	0	0	0	0	0	0	0.0244559	0	0	0	0	0	0	0	0	0.00271732
1433	Firmicutes	Clostridia_1	Clostridiales	Clostridiales_unclassified	Clostridiales_unclassified	0	0	0	0	0	0	0	0	0	0	0	0.0244559	0	0.0244559	0	0	0	0	0.00271732
1463	Firmicutes	Clostridia_1	Clostridiales	Lachnospiraceae	Gut_cluster_13	0	0	0	0	0.0244559	0	0.0244559	0	0	0	0	0	0	0	0	0	0	0	0.00271732
1475	Firmicutes	Clostridia_1	Clostridiales	Lachnospiraceae	Lachnospiraceae_unclassified	0	0	0	0	0.0244559	0	0.0244559	0	0	0	0	0	0	0	0	0	0	0	0.00271732
1519	Firmicutes	Clostridia_1	Clostridiales	Ruminococcaceae	Ruminococcaceae_unclassified	0	0	0	0	0	0	0	0	0	0.0244559	0	0.0244559	0	0	0	0	0	0	0.00271732
1585	Firmicutes	Firmicutes_unclassified	Firmicutes_unclassified	Firmicutes_unclassified	Firmicutes_unclassified	0.0244559	0	0	0	0	0	0	0	0	0	0	0	0	0.0244559	0	0	0	0	0.00271732
1667	Proteobacteria	Deltaproteobacteria	Desulfovibrionales	Desulfovibrionaceae	Gut_cluster_3	0	0	0	0	0	0	0	0	0	0	0	0.0244559	0	0.0244559	0	0	0	0	0.00271732
1687	Proteobacteria	Gammaproteobacteria_1	Gammaproteobacteria_1_unclassified	Gammaproteobacteria_1_unclassified	Gammaproteobacteria_1_unclassified	0	0	0	0.0244559	0	0	0.0244559	0	0	0	0	0	0	0	0	0	0	0	0.00271732
1692	Proteobacteria	Proteobacteria_unclassified	Proteobacteria_unclassified	Proteobacteria_unclassified	Proteobacteria_unclassified	0	0	0	0.0244559	0	0	0.0244559	0	0	0	0	0	0	0	0	0	0	0	0.00271732
1700	Synergistetes	Synergistia	Synergistales	Synergistaceae	Synergistaceae_unclassified	0.0244559	0	0	0	0	0	0	0	0	0	0	0	0	0.0244559	0	0	0	0	0.00271732
1307	Bacteroidetes	Bacteroidetes_unclassified	Bacteroidetes_unclassified	Bacteroidetes_unclassified	Bacteroidetes_unclassified	0	0	0	0	0	0	0	0	0	0	0	0	0	0	0.0489117	0	0	0	0.00271732
1321	Bacteroidetes	Bacteroidia	Bacteroidales	Bacteroidales_unclassified	Bacteroidales_unclassified	0	0	0	0	0	0	0.0244559	0	0	0	0	0.0244559	0	0	0	0	0	0	0.00271732
1347	Bacteroidetes	Bacteroidia	Bacteroidales	Porphyromonadaceae_1	Dysgonomonas	0	0	0	0	0	0	0	0	0	0	0	0	0	0	0.0489117	0	0	0	0.00271732
1386	Bacteroidetes	Sphingobacteria	Sphingobacteriales_1	SB_1	SB_1_unclassified	0.0244559	0	0	0	0	0	0.0244559	0	0	0	0	0	0	0	0	0	0	0	0.00271732
1439	Firmicutes	Clostridia_1	Clostridiales	Clostridiales_unclassified	Clostridiales_unclassified	0.0244559	0	0	0	0	0	0.0244559	0	0	0	0	0	0	0	0	0	0	0	0.00271732
1458	Firmicutes	Clostridia_1	Clostridiales	Lachnospiraceae	Catabacter	0	0	0	0	0	0	0	0	0	0	0	0	0	0	0.0489117	0	0	0	0.00271732
1526	Firmicutes	Clostridia_1	Clostridiales	Ruminococcaceae	Ruminococcaceae_unclassified	0	0	0	0	0	0	0.0244559	0	0	0	0	0.0244559	0	0	0	0	0	0	0.00271732
1541	Firmicutes	Clostridia_1	Clostridiales	Ruminococcaceae	Ruminococcaceae_unclassified	0.0244559	0	0	0	0	0	0.0244559	0	0	0	0	0	0	0	0	0	0	0	0.00271732
1572	Firmicutes	Firmicutes_unclassified	Firmicutes_unclassified	Firmicutes_unclassified	Firmicutes_unclassified	0.0244559	0	0	0	0	0	0.0244559	0	0	0	0	0	0	0	0	0	0	0	0.00271732
1578	Firmicutes	Firmicutes_unclassified	Firmicutes_unclassified	Firmicutes_unclassified	Firmicutes_unclassified	0	0	0	0	0	0	0	0	0	0	0	0	0	0	0.0489117	0	0	0	0.00271732
1580	Firmicutes	Firmicutes_unclassified	Firmicutes_unclassified	Firmicutes_unclassified	Firmicutes_unclassified	0	0	0	0	0	0	0.0244559	0	0	0	0	0.0244559	0	0	0	0	0	0	0.00271732
1644	Proteobacteria	Alphaproteobacteria	Sphingomonadales	Sphingomonadaceae	Sphingopyxis_1	0.0244559	0	0	0	0	0	0.0244559	0	0	0	0	0	0	0	0	0	0	0	0.00271732
1648	Proteobacteria	Betaproteobacteria	Burkholderiales	Burkholderiaceae_1	Burkholderiaceae_1_unclassified	0	0	0	0	0	0	0	0	0	0	0	0	0	0	0.0489117	0	0	0	0.00271732
1671	Proteobacteria	Deltaproteobacteria	Desulfovibrionales	Desulfovibrionaceae	Gut_cluster_3	0.0244559	0	0	0	0	0	0.0244559	0	0	0	0	0	0	0	0	0	0	0	0.00271732
1678	Proteobacteria	Deltaproteobacteria	Desulfovibrionales	Desulfovibrionaceae	Gut_cluster_3	0	0	0	0	0	0	0.0244559	0	0	0	0	0.0244559	0	0	0	0	0	0	0.00271732
1689	Proteobacteria	Gammaproteobacteria_2	Legionellales	Legionellaceae	Legionellaceae_unclassified	0	0	0	0	0	0	0	0	0	0	0	0	0	0	0.0489117	0	0	0	0.00271732
1271	Acidobacteria	Acidobacteria	Acidobacteriales	Acidobacteriaceae	Uncultured_31	0	0	0	0	0	0.0244559	0	0.0244559	0	0	0	0	0	0	0	0	0	0	0.00271732
1286	Actinobacteria	Actinobacteria	Corynebacteriales	Corynebacteriales_unclassified	Corynebacteriales_unclassified	0	0	0	0	0	0	0	0	0	0.0244559	0	0	0	0	0.0244559	0	0	0	0.00271732
1294	Actinobacteria	Actinobacteria	Micrococcales_3	Microbacteriaceae	Microbacteriaceae_unclassified	0	0	0	0	0	0	0	0	0	0.0244559	0	0	0	0	0.0244559	0	0	0	0.00271732
1301	Actinobacteria	Actinobacteria	Solirubrobacterales	Solirubrobacterales_unclassified	Solirubrobacterales_unclassified	0	0	0	0	0	0.0244559	0	0	0	0	0.0244559	0	0	0	0	0	0	0	0.00271732
1366	Bacteroidetes	Bacteroidia	Bacteroidales	Porphyromonadaceae_Cluster_V	Porphyromonadaceae_Cluster_V_unclassified	0	0	0	0	0	0.0244559	0	0	0	0	0	0	0	0	0	0	0.0244559	0	0.00271732
1383	Bacteroidetes	Bacteroidia	Bacteroidales	Rikenellaceae	Rikenellaceae_unclassified	0	0	0	0	0	0.0244559	0	0.0244559	0	0	0	0	0	0	0	0	0	0	0.00271732
1384	Bacteroidetes	Bacteroidia	Bacteroidales	Rikenellaceae	Rikenellaceae_unclassified	0	0	0	0	0	0.0244559	0	0.0244559	0	0	0	0	0	0	0	0	0	0	0.00271732
1449	Firmicutes	Clostridia_1	Clostridiales	Eubacteriaceae_1	Anaerofustis	0	0	0	0	0	0	0	0	0	0.0244559	0	0	0	0	0.0244559	0	0	0	0.00271732
1488	Firmicutes	Clostridia_1	Clostridiales	Lachnospiraceae	Lachnospiraceae_unclassified	0	0	0	0	0	0.0244559	0	0	0	0	0	0	0	0	0	0	0.0244559	0	0.00271732
1495	Firmicutes	Clostridia_1	Clostridiales	Ruminococcaceae	Gut_cluster_1	0	0	0	0	0	0.0244559	0	0	0	0	0.0244559	0	0	0	0	0	0	0	0.00271732
1505	Firmicutes	Clostridia_1	Clostridiales	Ruminococcaceae	Hydrogenoanaerobacterium	0	0	0	0	0	0.0244559	0	0	0	0	0.0244559	0	0	0	0	0	0	0	0.00271732
1564	Firmicutes	Clostridia_1	Clostridiales	Ruminococcaceae	Uncultured_28	0	0	0	0	0	0	0	0	0	0.0244559	0	0	0	0	0.0244559	0	0	0	0.00271732
1681	Proteobacteria	Deltaproteobacteria	Myxococcales	Myxococcales_unclassified	Myxococcales_unclassified	0	0	0	0	0	0.0244559	0	0.0244559	0	0	0	0	0	0	0	0	0	0	0.00271732
1702	Verrucomicrobia	Spartobacteria	FukuN18_freshwater_group	FukuN18_freshwater_group_unclassified	FukuN18_freshwater_group_unclassified	0	0	0	0	0	0.0244559	0	0.0244559	0	0	0	0	0	0	0	0	0	0	0.00271732
1332	Bacteroidetes	Bacteroidia	Bacteroidales	Bacteroidales_unclassified	Bacteroidales_unclassified	0	0	0	0.0244559	0	0.0244559	0	0	0	0	0	0	0	0	0	0	0	0	0.00271732
1405	Firmicutes	Bacilli	Lactobacillales	Lactobacillales_unclassified	Lactobacillales_unclassified	0	0	0	0	0.0244559	0.0244559	0	0	0	0	0	0	0	0	0	0	0	0	0.00271732
1619	Planctomycetes	Planctomycetacia	Planctomycetales	Planctomycetaceae	Singulisphaera	0	0	0	0	0.0244559	0.0244559	0	0	0	0	0	0	0	0	0	0	0	0	0.00271732
1622	Planctomycetes	Planctomycetacia	Planctomycetales	Planctomycetaceae	Termite_cockroach_cluster_2	0	0	0	0	0.0244559	0.0244559	0	0	0	0	0	0	0	0	0	0	0	0	0.00271732
1643	Proteobacteria	Alphaproteobacteria	Sphingomonadales	Sphingomonadaceae	Sphingomonas_3	0	0	0	0	0.0244559	0.0244559	0	0	0	0	0	0	0	0	0	0	0	0	0.00271732
1645	Proteobacteria	Alphaproteobacteria	Sphingomonadales	Sphingomonadales_unclassified	Sphingomonadales_unclassified	0	0	0	0	0.0244559	0.0244559	0	0	0	0	0	0	0	0	0	0	0	0	0.00271732
1300	Actinobacteria	Actinobacteria	Propionibacteriales	Nocardioidaceae	Nocardioides	0	0	0	0	0	0	0	0	0	0.0244559	0	0	0	0.0244559	0	0	0	0	0.00271732
1350	Bacteroidetes	Bacteroidia	Bacteroidales	Porphyromonadaceae_2	Termite_cluster_2	0	0	0	0	0	0	0	0	0	0	0	0	0	0.0489117	0	0	0	0	0.00271732
1356	Bacteroidetes	Bacteroidia	Bacteroidales	Porphyromonadaceae_3	Porphyromonadaceae_3_unclassified	0	0	0	0	0	0	0	0	0	0.0489117	0	0	0	0	0	0	0	0	0.00271732
1406	Firmicutes	Bacilli	Lactobacillales	Lactobacillales_unclassified	Lactobacillales_unclassified	0	0	0	0	0	0	0	0	0	0	0	0	0	0.0489117	0	0	0	0	0.00271732
1470	Firmicutes	Clostridia_1	Clostridiales	Lachnospiraceae	Gut_cluster_13	0	0	0	0	0	0	0	0	0	0	0	0	0	0.0489117	0	0	0	0	0.00271732
1477	Firmicutes	Clostridia_1	Clostridiales	Lachnospiraceae	Lachnospiraceae_unclassified	0	0	0	0	0	0	0	0	0	0.0489117	0	0	0	0	0	0	0	0	0.00271732
1512	Firmicutes	Clostridia_1	Clostridiales	Ruminococcaceae	Ruminococcaceae_unclassified	0	0	0	0	0	0	0.0244559	0	0	0	0	0	0	0	0.0244559	0	0	0	0.00271732
1514	Firmicutes	Clostridia_1	Clostridiales	Ruminococcaceae	Ruminococcaceae_unclassified	0	0	0	0	0	0	0	0	0	0.0489117	0	0	0	0	0	0	0	0	0.00271732
1517	Firmicutes	Clostridia_1	Clostridiales	Ruminococcaceae	Ruminococcaceae_unclassified	0	0	0	0	0	0	0	0	0	0.0489117	0	0	0	0	0	0	0	0	0.00271732
1544	Firmicutes	Clostridia_1	Clostridiales	Ruminococcaceae	Ruminococcaceae_unclassified	0	0	0	0	0	0	0	0	0	0.0489117	0	0	0	0	0	0	0	0	0.00271732
1565	Firmicutes	Clostridia_1	Clostridiales	Ruminococcaceae	Uncultured_29	0	0	0	0	0	0	0	0	0	0	0	0	0	0.0489117	0	0	0	0	0.00271732
1574	Firmicutes	Firmicutes_unclassified	Firmicutes_unclassified	Firmicutes_unclassified	Firmicutes_unclassified	0.0244559	0	0	0	0	0.0244559	0	0	0	0	0	0	0	0	0	0	0	0	0.00271732
1596	Planctomycetes	Phycisphaerae	WD2101_soil_group	WD2101_soil_group_unclassified	WD2101_soil_group_unclassified	0	0	0	0	0	0	0	0	0	0	0	0	0	0.0489117	0	0	0	0	0.00271732
1611	Planctomycetes	Planctomycetacia	Planctomycetales	Planctomycetaceae	Planctomycetaceae_unclassified	0	0	0	0	0	0	0	0	0	0.0489117	0	0	0	0	0	0	0	0	0.00271732
1362	Bacteroidetes	Bacteroidia	Bacteroidales	Porphyromonadaceae_3	Tannerella	0	0	0	0	0	0	0.0244559	0	0	0	0	0	0	0.0244559	0	0	0	0	0.00271732
1370	Bacteroidetes	Bacteroidia	Bacteroidales	Porphyromonadaceae_Gut_group	Termite_cluster_I	0	0	0	0	0	0	0.0489117	0	0	0	0	0	0	0	0	0	0	0	0.00271732
1448	Firmicutes	Clostridia_1	Clostridiales	Clostridiales_unclassified	Clostridiales_unclassified	0	0	0	0	0	0	0.0489117	0	0	0	0	0	0	0	0	0	0	0	0.00271732
1691	Proteobacteria	Proteobacteria_unclassified	Proteobacteria_unclassified	Proteobacteria_unclassified	Proteobacteria_unclassified	0	0	0	0	0	0	0.0489117	0	0	0	0	0	0	0	0	0	0	0	0.00271732
1313	Bacteroidetes	Bacteroidia	Bacteroidales	Bacteroidaceae	Bacteroides	0	0	0	0	0	0.0244559	0	0	0	0	0	0	0	0	0.0244559	0	0	0	0.00271732
1421	Firmicutes	Clostridia_1	Clostridiales	Clostridiales_unclassified	Clostridiales_unclassified	0	0	0	0	0	0.0244559	0	0	0	0	0	0	0	0	0.0244559	0	0	0	0.00271732
1561	Firmicutes	Clostridia_1	Clostridiales	Ruminococcaceae	Termite_cockroach_cluster	0	0	0	0	0	0.0244559	0	0	0	0.0244559	0	0	0	0	0	0	0	0	0.00271732
1632	Proteobacteria	Alphaproteobacteria	Caulobacterales	Caulobacteraceae	Uncultured_3	0	0	0	0	0	0.0244559	0	0	0	0.0244559	0	0	0	0	0	0	0	0	0.00271732
1299	Actinobacteria	Actinobacteria	Propionibacteriales	Nocardioidaceae	Nocardioidaceae_unclassified	0	0	0	0	0	0.0244559	0.0244559	0	0	0	0	0	0	0	0	0	0	0	0.00271732
1426	Firmicutes	Clostridia_1	Clostridiales	Clostridiales_unclassified	Clostridiales_unclassified	0	0	0	0	0	0.0244559	0.0244559	0	0	0	0	0	0	0	0	0	0	0	0.00271732
1438	Firmicutes	Clostridia_1	Clostridiales	Clostridiales_unclassified	Clostridiales_unclassified	0	0	0	0	0	0.0244559	0.0244559	0	0	0	0	0	0	0	0	0	0	0	0.00271732
1641	Proteobacteria	Alphaproteobacteria	Sphingomonadales	Sphingomonadaceae	Sphingomonadaceae_unclassified	0	0	0	0	0	0.0244559	0.0244559	0	0	0	0	0	0	0	0	0	0	0	0.00271732
1454	Firmicutes	Clostridia_1	Clostridiales	Family_XIII_Incertae_Sedis	Termite_cockroach_cluster_1	0	0	0	0	0	0.0489117	0	0	0	0	0	0	0	0	0	0	0	0	0.00271732
1559	Firmicutes	Clostridia_1	Clostridiales	Ruminococcaceae	Termite_cockroach_cluster	0	0	0	0	0	0.0489117	0	0	0	0	0	0	0	0	0	0	0	0	0.00271732
1078	Bacteroidetes	Bacteroidia	Bacteroidales	Prevotellaceae	Prevotella_1	0	0	0	0	0	0	0	0	0	0	0	0	0	0	0	0.0366838	0	0	0.00203799
1719	Actinobacteria	Actinobacteria	Acidimicrobiales	Acidimicrobiales_unclassified	Acidimicrobiales_unclassified	0	0	0	0	0	0	0	0	0	0	0	0	0	0	0	0.0366838	0	0	0.00203799
1722	Actinobacteria	Actinobacteria	Acidimicrobiales	Iamiaceae	Iamia	0	0	0	0	0	0	0	0	0	0	0	0	0	0	0	0	0	0.0366838	0.00203799
1727	Actinobacteria	Actinobacteria	Actinobacteria_unclassified	Actinobacteria_unclassified	Actinobacteria_unclassified	0	0	0.0366838	0	0	0	0	0	0	0	0	0	0	0	0	0	0	0	0.00203799
1736	Actinobacteria	Actinobacteria	Actinomycetales	Actinomycetaceae	Mobiluncus	0	0	0	0	0	0	0	0	0	0	0	0	0	0	0	0.0366838	0	0	0.00203799
1742	Actinobacteria	Actinobacteria	Actinomycetales	Actinomycetales_unclassified	Actinomycetales_unclassified	0	0	0	0	0	0	0	0	0	0	0	0	0	0	0	0.0366838	0	0	0.00203799
1743	Actinobacteria	Actinobacteria	Actinomycetales	Actinomycetales_unclassified	Actinomycetales_unclassified	0	0	0.0366838	0	0	0	0	0	0	0	0	0	0	0	0	0	0	0	0.00203799
1750	Actinobacteria	Actinobacteria	Coriobacteriales	Coriobacteriaceae	Uncultured_10	0	0	0	0	0	0	0	0	0.0366838	0	0	0	0	0	0	0	0	0	0.00203799
1762	Actinobacteria	Actinobacteria	Corynebacteriales	Corynebacteriales_unclassified	Corynebacteriales_unclassified	0	0	0	0	0	0	0	0	0	0	0	0	0	0	0	0	0	0.0366838	0.00203799
1763	Actinobacteria	Actinobacteria	Corynebacteriales	Corynebacteriales_unclassified	Corynebacteriales_unclassified	0	0	0	0	0	0	0	0	0	0	0	0	0	0	0	0	0	0.0366838	0.00203799
1775	Actinobacteria	Actinobacteria	Micrococcales_3	Microbacteriaceae	Microbacteriaceae_unclassified	0	0	0	0	0	0	0	0	0	0	0	0	0	0	0	0	0	0.0366838	0.00203799
1776	Actinobacteria	Actinobacteria	Micrococcales_3	Micrococcales_3_unclassified	Micrococcales_3_unclassified	0	0	0	0	0	0	0	0	0	0	0	0	0	0	0	0	0	0.0366838	0.00203799
1778	Actinobacteria	Actinobacteria	Micromonosporales	Micromonosporaceae	Micromonosporaceae_unclassified	0	0	0	0	0	0	0	0	0	0	0	0	0	0	0	0	0	0.0366838	0.00203799
1786	Actinobacteria	Actinobacteria	Propionibacteriales	Propionibacteriaceae	Jiangella	0	0	0	0	0	0	0	0	0.0366838	0	0	0	0	0	0	0	0	0	0.00203799
1790	Actinobacteria	Actinobacteria	Solirubrobacterales	Cluster_480-2	Cluster_480-2_unclassified	0	0	0.0366838	0	0	0	0	0	0	0	0	0	0	0	0	0	0	0	0.00203799
1800	Bacteroidetes	Bacteroidetes_unclassified	Bacteroidetes_unclassified	Bacteroidetes_unclassified	Bacteroidetes_unclassified	0	0	0.0366838	0	0	0	0	0	0	0	0	0	0	0	0	0	0	0	0.00203799
1802	Bacteroidetes	Bacteroidetes_unclassified	Bacteroidetes_unclassified	Bacteroidetes_unclassified	Bacteroidetes_unclassified	0	0	0	0	0	0	0	0	0.0366838	0	0	0	0	0	0	0	0	0	0.00203799
1807	Bacteroidetes	Bacteroidetes_unclassified	Bacteroidetes_unclassified	Bacteroidetes_unclassified	Bacteroidetes_unclassified	0	0	0.0366838	0	0	0	0	0	0	0	0	0	0	0	0	0	0	0	0.00203799
1808	Bacteroidetes	Bacteroidetes_unclassified	Bacteroidetes_unclassified	Bacteroidetes_unclassified	Bacteroidetes_unclassified	0	0	0	0	0	0	0	0	0.0366838	0	0	0	0	0	0	0	0	0	0.00203799
1823	Bacteroidetes	Bacteroidetes_unclassified	Bacteroidetes_unclassified	Bacteroidetes_unclassified	Bacteroidetes_unclassified	0	0	0	0	0	0	0	0	0.0366838	0	0	0	0	0	0	0	0	0	0.00203799
1825	Bacteroidetes	Bacteroidetes_unclassified	Bacteroidetes_unclassified	Bacteroidetes_unclassified	Bacteroidetes_unclassified	0	0	0	0	0	0	0	0	0.0366838	0	0	0	0	0	0	0	0	0	0.00203799
1827	Bacteroidetes	Bacteroidetes_unclassified	Bacteroidetes_unclassified	Bacteroidetes_unclassified	Bacteroidetes_unclassified	0	0	0.0366838	0	0	0	0	0	0	0	0	0	0	0	0	0	0	0	0.00203799
1842	Bacteroidetes	Bacteroidia	Bacteroidales	Bacteroidaceae	Bacteroides	0	0	0	0	0	0	0	0	0	0	0	0	0	0	0	0.0366838	0	0	0.00203799
1848	Bacteroidetes	Bacteroidia	Bacteroidales	Bacteroidales_unclassified	Bacteroidales_unclassified	0	0	0	0	0	0	0	0	0.0366838	0	0	0	0	0	0	0	0	0	0.00203799
1849	Bacteroidetes	Bacteroidia	Bacteroidales	Bacteroidales_unclassified	Bacteroidales_unclassified	0	0	0	0	0	0	0	0	0.0366838	0	0	0	0	0	0	0	0	0	0.00203799
1850	Bacteroidetes	Bacteroidia	Bacteroidales	Bacteroidales_unclassified	Bacteroidales_unclassified	0	0	0	0	0	0	0	0	0.0366838	0	0	0	0	0	0	0	0	0	0.00203799
1854	Bacteroidetes	Bacteroidia	Bacteroidales	Bacteroidales_unclassified	Bacteroidales_unclassified	0	0	0.0366838	0	0	0	0	0	0	0	0	0	0	0	0	0	0	0	0.00203799
1855	Bacteroidetes	Bacteroidia	Bacteroidales	Bacteroidales_unclassified	Bacteroidales_unclassified	0	0	0	0	0	0	0	0	0.0366838	0	0	0	0	0	0	0	0	0	0.00203799
1863	Bacteroidetes	Bacteroidia	Bacteroidales	Bacteroidales_unclassified	Bacteroidales_unclassified	0	0	0	0	0	0	0	0	0	0	0	0	0	0	0	0.0366838	0	0	0.00203799
1864	Bacteroidetes	Bacteroidia	Bacteroidales	Bacteroidales_unclassified	Bacteroidales_unclassified	0	0	0	0	0	0	0	0	0.0366838	0	0	0	0	0	0	0	0	0	0.00203799
1867	Bacteroidetes	Bacteroidia	Bacteroidales	Bacteroidales_unclassified	Bacteroidales_unclassified	0	0	0.0366838	0	0	0	0	0	0	0	0	0	0	0	0	0	0	0	0.00203799
1879	Bacteroidetes	Bacteroidia	Bacteroidales	Bacteroidales_unclassified	Bacteroidales_unclassified	0	0	0	0	0	0	0	0	0.0366838	0	0	0	0	0	0	0	0	0	0.00203799
1881	Bacteroidetes	Bacteroidia	Bacteroidales	Bacteroidales_unclassified	Bacteroidales_unclassified	0	0	0	0	0	0	0	0	0	0	0	0	0	0	0	0.0366838	0	0	0.00203799
1884	Bacteroidetes	Bacteroidia	Bacteroidales	Bacteroidales_unclassified	Bacteroidales_unclassified	0	0	0	0	0	0	0	0	0	0	0	0	0	0	0	0	0	0.0366838	0.00203799
1885	Bacteroidetes	Bacteroidia	Bacteroidales	Bacteroidales_unclassified	Bacteroidales_unclassified	0	0	0.0366838	0	0	0	0	0	0	0	0	0	0	0	0	0	0	0	0.00203799
1888	Bacteroidetes	Bacteroidia	Bacteroidales	Bacteroidales_unclassified	Bacteroidales_unclassified	0	0	0	0	0	0	0	0	0	0	0	0	0	0	0	0	0	0.0366838	0.00203799
1896	Bacteroidetes	Bacteroidia	Bacteroidales	Bacteroidales_unclassified	Bacteroidales_unclassified	0	0	0	0	0	0	0	0	0	0	0	0	0	0	0	0	0	0.0366838	0.00203799
1912	Bacteroidetes	Bacteroidia	Bacteroidales	Bacteroidales_unclassified	Bacteroidales_unclassified	0	0	0	0	0	0	0	0	0.0366838	0	0	0	0	0	0	0	0	0	0.00203799
1916	Bacteroidetes	Bacteroidia	Bacteroidales	Bacteroidales_unclassified	Bacteroidales_unclassified	0	0	0.0366838	0	0	0	0	0	0	0	0	0	0	0	0	0	0	0	0.00203799
1925	Bacteroidetes	Bacteroidia	Bacteroidales	Bacteroidales_unclassified	Bacteroidales_unclassified	0	0	0.0366838	0	0	0	0	0	0	0	0	0	0	0	0	0	0	0	0.00203799
1932	Bacteroidetes	Bacteroidia	Bacteroidales	Porphyromonadaceae_1	Dysgonomonas	0	0	0	0	0	0	0	0	0	0	0	0	0	0	0	0	0	0.0366838	0.00203799
1938	Bacteroidetes	Bacteroidia	Bacteroidales	Porphyromonadaceae_2	Porphyromonadaceae_2_unclassified	0	0	0	0	0	0	0	0	0	0	0	0	0	0	0	0	0	0.0366838	0.00203799
1954	Bacteroidetes	Bacteroidia	Bacteroidales	Porphyromonadaceae_3	Porphyromonadaceae_3_unclassified	0	0	0	0	0	0	0	0	0.0366838	0	0	0	0	0	0	0	0	0	0.00203799
1964	Bacteroidetes	Bacteroidia	Bacteroidales	Porphyromonadaceae_3	Porphyromonadaceae_3_unclassified	0	0	0.0366838	0	0	0	0	0	0	0	0	0	0	0	0	0	0	0	0.00203799
1976	Bacteroidetes	Bacteroidia	Bacteroidales	Porphyromonadaceae_Cluster_V	Porphyromonadaceae_Cluster_V_unclassified	0	0	0	0	0	0	0	0	0.0366838	0	0	0	0	0	0	0	0	0	0.00203799
1993	Bacteroidetes	Bacteroidia	Bacteroidales	Rikenellaceae	Alisitpes_IV	0	0	0.0366838	0	0	0	0	0	0	0	0	0	0	0	0	0	0	0	0.00203799
1996	Bacteroidetes	Bacteroidia	Bacteroidales	Rikenellaceae	Alisitpes_IV	0	0	0.0366838	0	0	0	0	0	0	0	0	0	0	0	0	0	0	0	0.00203799
2005	Bacteroidetes	Bacteroidia	Bacteroidales	Rikenellaceae	Alisitpes_IV	0	0	0.0366838	0	0	0	0	0	0	0	0	0	0	0	0	0	0	0	0.00203799
2011	Bacteroidetes	Bacteroidia	Bacteroidales	Rikenellaceae	Alistipes_III	0	0	0	0	0	0	0	0	0.0366838	0	0	0	0	0	0	0	0	0	0.00203799
2012	Bacteroidetes	Bacteroidia	Bacteroidales	Rikenellaceae	Alistipes_III	0	0	0.0366838	0	0	0	0	0	0	0	0	0	0	0	0	0	0	0	0.00203799
2015	Bacteroidetes	Bacteroidia	Bacteroidales	Rikenellaceae	Rikenellaceae_unclassified	0	0	0	0	0	0	0	0	0	0	0	0	0	0	0	0	0	0.0366838	0.00203799
2025	Bacteroidetes	Sphingobacteria	Sphingobacteriales_1	Sphingobacteriaceae	Sphingobacterium_1	0	0	0	0	0	0	0	0	0	0	0	0	0	0	0	0	0	0.0366838	0.00203799
2043	Chloroflexi	Thermomicrobia	JG30-KF-CM45	JG30-KF-CM45_unclassified	JG30-KF-CM45_unclassified	0	0	0.0366838	0	0	0	0	0	0	0	0	0	0	0	0	0	0	0	0.00203799
2045	Deferribacteres	Deferribacteres	Deferribacterales	Deferribacteraceae	Mucispirillum	0	0	0.0366838	0	0	0	0	0	0	0	0	0	0	0	0	0	0	0	0.00203799
2047	Firmicutes	Bacilli	Bacillales	Bacillaceae	Bacillus_7	0	0	0	0	0	0	0	0	0	0	0	0	0	0	0	0.0366838	0	0	0.00203799
2050	Firmicutes	Bacilli	Bacillales	Family_XI_Incertae_Sedis	Gemella	0	0	0.0366838	0	0	0	0	0	0	0	0	0	0	0	0	0	0	0	0.00203799
2053	Firmicutes	Bacilli	Bacillales	Paenibacillaceae_2	Paenibacillaceae_2_unclassified	0	0	0	0	0	0	0	0	0	0	0	0	0	0	0	0	0	0.0366838	0.00203799
2066	Firmicutes	Bacilli	Bacilli_unclassified	Bacilli_unclassified	Bacilli_unclassified	0	0	0	0	0	0	0	0	0	0	0	0	0	0	0	0.0366838	0	0	0.00203799
2079	Firmicutes	Bacilli	Lactobacillales	Lactobacillales_unclassified	Lactobacillales_unclassified	0	0	0	0	0	0	0	0	0	0	0	0	0	0	0	0.0366838	0	0	0.00203799
2081	Firmicutes	Bacilli	Lactobacillales	Lactobacillales_unclassified	Lactobacillales_unclassified	0	0	0.0366838	0	0	0	0	0	0	0	0	0	0	0	0	0	0	0	0.00203799
2085	Firmicutes	Bacilli	Lactobacillales	Lactobacillales_unclassified	Lactobacillales_unclassified	0	0	0	0	0	0	0	0	0	0	0	0	0	0	0	0.0366838	0	0	0.00203799
2087	Firmicutes	Bacilli	Lactobacillales	Lactobacillales_unclassified	Lactobacillales_unclassified	0	0	0.0366838	0	0	0	0	0	0	0	0	0	0	0	0	0	0	0	0.00203799
2093	Firmicutes	Bacilli	Lactobacillales	Lactobacillales_unclassified	Lactobacillales_unclassified	0	0	0.0366838	0	0	0	0	0	0	0	0	0	0	0	0	0	0	0	0.00203799
2094	Firmicutes	Bacilli	Lactobacillales	Lactobacillales_unclassified	Lactobacillales_unclassified	0	0	0	0	0	0	0	0	0	0	0	0	0	0	0	0.0366838	0	0	0.00203799
2108	Firmicutes	Bacilli	Lactobacillales	Lactobacillales_unclassified	Lactobacillales_unclassified	0	0	0.0366838	0	0	0	0	0	0	0	0	0	0	0	0	0	0	0	0.00203799
2111	Firmicutes	Bacilli	Lactobacillales	Lactobacillales_unclassified	Lactobacillales_unclassified	0	0	0	0	0	0	0	0	0	0	0	0	0	0	0	0	0	0.0366838	0.00203799
2113	Firmicutes	Bacilli	Lactobacillales	Lactobacillales_unclassified	Lactobacillales_unclassified	0	0	0.0366838	0	0	0	0	0	0	0	0	0	0	0	0	0	0	0	0.00203799
2114	Firmicutes	Bacilli	Lactobacillales	Lactobacillales_unclassified	Lactobacillales_unclassified	0	0	0	0	0	0	0	0	0	0	0	0	0	0	0	0.0366838	0	0	0.00203799
2115	Firmicutes	Bacilli	Lactobacillales	Lactobacillales_unclassified	Lactobacillales_unclassified	0	0	0	0	0	0	0	0	0.0366838	0	0	0	0	0	0	0	0	0	0.00203799
2124	Firmicutes	Bacilli	Lactobacillales	Leuconostocaceae	Weissella_1	0	0	0	0	0	0	0	0	0	0	0	0	0	0	0	0.0366838	0	0	0.00203799
2127	Firmicutes	Bacilli	Lactobacillales	Leuconostocaceae	Weissella_1	0	0	0	0	0	0	0	0	0	0	0	0	0	0	0	0.0366838	0	0	0.00203799
2128	Firmicutes	Bacilli	Lactobacillales	Streptococcaceae	Lactococcus_2	0	0	0	0	0	0	0	0	0	0	0	0	0	0	0	0.0366838	0	0	0.00203799
2129	Firmicutes	Bacilli	Lactobacillales	Streptococcaceae	Lactococcus_2	0	0	0	0	0	0	0	0	0.0366838	0	0	0	0	0	0	0	0	0	0.00203799
2130	Firmicutes	Bacilli	Lactobacillales	Streptococcaceae	Streptococcaceae_unclassified	0	0	0	0	0	0	0	0	0	0	0	0	0	0	0	0.0366838	0	0	0.00203799
2142	Firmicutes	Clostridia_1	Clostridiales	Clostridiales_unclassified	Clostridiales_unclassified	0	0	0.0366838	0	0	0	0	0	0	0	0	0	0	0	0	0	0	0	0.00203799
2150	Firmicutes	Clostridia_1	Clostridiales	Clostridiales_unclassified	Clostridiales_unclassified	0	0	0.0366838	0	0	0	0	0	0	0	0	0	0	0	0	0	0	0	0.00203799
2154	Firmicutes	Clostridia_1	Clostridiales	Clostridiales_unclassified	Clostridiales_unclassified	0	0	0.0366838	0	0	0	0	0	0	0	0	0	0	0	0	0	0	0	0.00203799
2158	Firmicutes	Clostridia_1	Clostridiales	Clostridiales_unclassified	Clostridiales_unclassified	0	0	0.0366838	0	0	0	0	0	0	0	0	0	0	0	0	0	0	0	0.00203799
2166	Firmicutes	Clostridia_1	Clostridiales	Clostridiales_unclassified	Clostridiales_unclassified	0	0	0	0	0	0	0	0	0	0	0	0	0	0	0	0.0366838	0	0	0.00203799
2169	Firmicutes	Clostridia_1	Clostridiales	Clostridiales_unclassified	Clostridiales_unclassified	0	0	0	0	0	0	0	0	0	0	0	0	0	0	0	0	0	0.0366838	0.00203799
2170	Firmicutes	Clostridia_1	Clostridiales	Clostridiales_unclassified	Clostridiales_unclassified	0	0	0.0366838	0	0	0	0	0	0	0	0	0	0	0	0	0	0	0	0.00203799
2174	Firmicutes	Clostridia_1	Clostridiales	Clostridiales_unclassified	Clostridiales_unclassified	0	0	0	0	0	0	0	0	0	0	0	0	0	0	0	0.0366838	0	0	0.00203799
2177	Firmicutes	Clostridia_1	Clostridiales	Clostridiales_unclassified	Clostridiales_unclassified	0	0	0	0	0	0	0	0	0.0366838	0	0	0	0	0	0	0	0	0	0.00203799
2191	Firmicutes	Clostridia_1	Clostridiales	Clostridiales_unclassified	Clostridiales_unclassified	0	0	0	0	0	0	0	0	0.0366838	0	0	0	0	0	0	0	0	0	0.00203799
2193	Firmicutes	Clostridia_1	Clostridiales	Clostridiales_unclassified	Clostridiales_unclassified	0	0	0.0366838	0	0	0	0	0	0	0	0	0	0	0	0	0	0	0	0.00203799
2195	Firmicutes	Clostridia_1	Clostridiales	Clostridiales_unclassified	Clostridiales_unclassified	0	0	0.0366838	0	0	0	0	0	0	0	0	0	0	0	0	0	0	0	0.00203799
2196	Firmicutes	Clostridia_1	Clostridiales	Clostridiales_unclassified	Clostridiales_unclassified	0	0	0	0	0	0	0	0	0	0	0	0	0	0	0	0.0366838	0	0	0.00203799
2198	Firmicutes	Clostridia_1	Clostridiales	Clostridiales_unclassified	Clostridiales_unclassified	0	0	0.0366838	0	0	0	0	0	0	0	0	0	0	0	0	0	0	0	0.00203799
2203	Firmicutes	Clostridia_1	Clostridiales	Clostridiales_unclassified	Clostridiales_unclassified	0	0	0	0	0	0	0	0	0	0	0	0	0	0	0	0.0366838	0	0	0.00203799
2217	Firmicutes	Clostridia_1	Clostridiales	Clostridiales_unclassified	Clostridiales_unclassified	0	0	0	0	0	0	0	0	0	0	0	0	0	0	0	0	0	0.0366838	0.00203799
2221	Firmicutes	Clostridia_1	Clostridiales	Clostridiales_unclassified	Clostridiales_unclassified	0	0	0	0	0	0	0	0	0	0	0	0	0	0	0	0.0366838	0	0	0.00203799
2233	Firmicutes	Clostridia_1	Clostridiales	Family_XIII_Incertae_Sedis	Family_XIII_Incertae_Sedis_unclassified	0	0	0.0366838	0	0	0	0	0	0	0	0	0	0	0	0	0	0	0	0.00203799
2234	Firmicutes	Clostridia_1	Clostridiales	Family_XIII_Incertae_Sedis	Family_XIII_Incertae_Sedis_unclassified	0	0	0.0366838	0	0	0	0	0	0	0	0	0	0	0	0	0	0	0	0.00203799
2249	Firmicutes	Clostridia_1	Clostridiales	Lachnospiraceae	Gut_cluster_13	0	0	0	0	0	0	0	0	0	0	0	0	0	0	0	0.0366838	0	0	0.00203799
2253	Firmicutes	Clostridia_1	Clostridiales	Lachnospiraceae	Gut_cluster_13	0	0	0.0366838	0	0	0	0	0	0	0	0	0	0	0	0	0	0	0	0.00203799
2254	Firmicutes	Clostridia_1	Clostridiales	Lachnospiraceae	Gut_cluster_13	0	0	0	0	0	0	0	0	0	0	0	0	0	0	0	0.0366838	0	0	0.00203799
2256	Firmicutes	Clostridia_1	Clostridiales	Lachnospiraceae	Gut_cluster_13	0	0	0	0	0	0	0	0	0	0	0	0	0	0	0	0.0366838	0	0	0.00203799
2258	Firmicutes	Clostridia_1	Clostridiales	Lachnospiraceae	Gut_cluster_13	0	0	0	0	0	0	0	0	0	0	0	0	0	0	0	0.0366838	0	0	0.00203799
2261	Firmicutes	Clostridia_1	Clostridiales	Lachnospiraceae	Gut_cluster_13	0	0	0	0	0	0	0	0	0	0	0	0	0	0	0	0.0366838	0	0	0.00203799
2273	Firmicutes	Clostridia_1	Clostridiales	Lachnospiraceae	Gut_cluster_13	0	0	0	0	0	0	0	0	0	0	0	0	0	0	0	0.0366838	0	0	0.00203799
2274	Firmicutes	Clostridia_1	Clostridiales	Lachnospiraceae	Gut_cluster_13	0	0	0.0366838	0	0	0	0	0	0	0	0	0	0	0	0	0	0	0	0.00203799
2295	Firmicutes	Clostridia_1	Clostridiales	Lachnospiraceae	Gut_cluster_13	0	0	0	0	0	0	0	0	0	0	0	0	0	0	0	0.0366838	0	0	0.00203799
2304	Firmicutes	Clostridia_1	Clostridiales	Lachnospiraceae	Gut_cluster_13	0	0	0.0366838	0	0	0	0	0	0	0	0	0	0	0	0	0	0	0	0.00203799
2319	Firmicutes	Clostridia_1	Clostridiales	Lachnospiraceae	Gut_cluster_13	0	0	0.0366838	0	0	0	0	0	0	0	0	0	0	0	0	0	0	0	0.00203799
2321	Firmicutes	Clostridia_1	Clostridiales	Lachnospiraceae	Gut_cluster_13	0	0	0	0	0	0	0	0	0	0	0	0	0	0	0	0	0	0.0366838	0.00203799
2324	Firmicutes	Clostridia_1	Clostridiales	Lachnospiraceae	Gut_cluster_13	0	0	0	0	0	0	0	0	0	0	0	0	0	0	0	0.0366838	0	0	0.00203799
2327	Firmicutes	Clostridia_1	Clostridiales	Lachnospiraceae	Gut_cluster_13	0	0	0	0	0	0	0	0	0	0	0	0	0	0	0	0	0	0.0366838	0.00203799
2330	Firmicutes	Clostridia_1	Clostridiales	Lachnospiraceae	Gut_cluster_13	0	0	0	0	0	0	0	0	0	0	0	0	0	0	0	0.0366838	0	0	0.00203799
2332	Firmicutes	Clostridia_1	Clostridiales	Lachnospiraceae	Gut_cluster_13	0	0	0.0366838	0	0	0	0	0	0	0	0	0	0	0	0	0	0	0	0.00203799
2338	Firmicutes	Clostridia_1	Clostridiales	Lachnospiraceae	Gut_cluster_13	0	0	0	0	0	0	0	0	0	0	0	0	0	0	0	0	0	0.0366838	0.00203799
2340	Firmicutes	Clostridia_1	Clostridiales	Lachnospiraceae	Gut_cluster_15	0	0	0	0	0	0	0	0	0	0	0	0	0	0	0	0	0	0.0366838	0.00203799
2344	Firmicutes	Clostridia_1	Clostridiales	Lachnospiraceae	Lachnospiraceae_unclassified	0	0	0	0	0	0	0	0	0	0	0	0	0	0	0	0.0366838	0	0	0.00203799
2351	Firmicutes	Clostridia_1	Clostridiales	Lachnospiraceae	Lachnospiraceae_unclassified	0	0	0.0366838	0	0	0	0	0	0	0	0	0	0	0	0	0	0	0	0.00203799
2356	Firmicutes	Clostridia_1	Clostridiales	Lachnospiraceae	Lachnospiraceae_unclassified	0	0	0	0	0	0	0	0	0.0366838	0	0	0	0	0	0	0	0	0	0.00203799
2362	Firmicutes	Clostridia_1	Clostridiales	Lachnospiraceae	Lachnospiraceae_unclassified	0	0	0.0366838	0	0	0	0	0	0	0	0	0	0	0	0	0	0	0	0.00203799
2372	Firmicutes	Clostridia_1	Clostridiales	Lachnospiraceae	Lachnospiraceae_unclassified	0	0	0	0	0	0	0	0	0	0	0	0	0	0	0	0	0	0.0366838	0.00203799
2378	Firmicutes	Clostridia_1	Clostridiales	Lachnospiraceae	Lachnospiraceae_unclassified	0	0	0	0	0	0	0	0	0	0	0	0	0	0	0	0	0	0.0366838	0.00203799
2384	Firmicutes	Clostridia_1	Clostridiales	Lachnospiraceae	Lachnospiraceae_unclassified	0	0	0	0	0	0	0	0	0.0366838	0	0	0	0	0	0	0	0	0	0.00203799
2391	Firmicutes	Clostridia_1	Clostridiales	Lachnospiraceae	Lachnospiraceae_unclassified	0	0	0	0	0	0	0	0	0	0	0	0	0	0	0	0.0366838	0	0	0.00203799
2403	Firmicutes	Clostridia_1	Clostridiales	Lachnospiraceae	Lachnospiraceae_unclassified	0	0	0	0	0	0	0	0	0.0366838	0	0	0	0	0	0	0	0	0	0.00203799
2407	Firmicutes	Clostridia_1	Clostridiales	Lachnospiraceae	Lachnospiraceae_unclassified	0	0	0	0	0	0	0	0	0.0366838	0	0	0	0	0	0	0	0	0	0.00203799
2408	Firmicutes	Clostridia_1	Clostridiales	Lachnospiraceae	Lachnospiraceae_unclassified	0	0	0	0	0	0	0	0	0	0	0	0	0	0	0	0	0	0.0366838	0.00203799
2411	Firmicutes	Clostridia_1	Clostridiales	Lachnospiraceae	Lachnospiraceae_unclassified	0	0	0	0	0	0	0	0	0	0	0	0	0	0	0	0.0366838	0	0	0.00203799
2418	Firmicutes	Clostridia_1	Clostridiales	Lachnospiraceae	Robinsoniella_Insects	0	0	0	0	0	0	0	0	0	0	0	0	0	0	0	0.0366838	0	0	0.00203799
2419	Firmicutes	Clostridia_1	Clostridiales	Lachnospiraceae	Termite_cluster	0	0	0	0	0	0	0	0	0.0366838	0	0	0	0	0	0	0	0	0	0.00203799
2427	Firmicutes	Clostridia_1	Clostridiales	Ruminococcaceae	Gut_cluster_1	0	0	0	0	0	0	0	0	0	0	0	0	0	0	0	0	0	0.0366838	0.00203799
2439	Firmicutes	Clostridia_1	Clostridiales	Ruminococcaceae	Gut_cluster_7	0	0	0	0	0	0	0	0	0	0	0	0	0	0	0	0	0	0.0366838	0.00203799
2442	Firmicutes	Clostridia_1	Clostridiales	Ruminococcaceae	Insect_cluster	0	0	0	0	0	0	0	0	0	0	0	0	0	0	0	0	0	0.0366838	0.00203799
2447	Firmicutes	Clostridia_1	Clostridiales	Ruminococcaceae	Insect_cluster	0	0	0.0366838	0	0	0	0	0	0	0	0	0	0	0	0	0	0	0	0.00203799
2448	Firmicutes	Clostridia_1	Clostridiales	Ruminococcaceae	Insect_cluster	0	0	0.0366838	0	0	0	0	0	0	0	0	0	0	0	0	0	0	0	0.00203799
2462	Firmicutes	Clostridia_1	Clostridiales	Ruminococcaceae	Ruminococcaceae_unclassified	0	0	0.0366838	0	0	0	0	0	0	0	0	0	0	0	0	0	0	0	0.00203799
2466	Firmicutes	Clostridia_1	Clostridiales	Ruminococcaceae	Ruminococcaceae_unclassified	0	0	0	0	0	0	0	0	0	0	0	0	0	0	0	0.0366838	0	0	0.00203799
2469	Firmicutes	Clostridia_1	Clostridiales	Ruminococcaceae	Ruminococcaceae_unclassified	0	0	0.0366838	0	0	0	0	0	0	0	0	0	0	0	0	0	0	0	0.00203799
2470	Firmicutes	Clostridia_1	Clostridiales	Ruminococcaceae	Ruminococcaceae_unclassified	0	0	0	0	0	0	0	0	0	0	0	0	0	0	0	0	0	0.0366838	0.00203799
2476	Firmicutes	Clostridia_1	Clostridiales	Ruminococcaceae	Ruminococcaceae_unclassified	0	0	0	0	0	0	0	0	0	0	0	0	0	0	0	0.0366838	0	0	0.00203799
2481	Firmicutes	Clostridia_1	Clostridiales	Ruminococcaceae	Ruminococcaceae_unclassified	0	0	0	0	0	0	0	0	0	0	0	0	0	0	0	0	0	0.0366838	0.00203799
2483	Firmicutes	Clostridia_1	Clostridiales	Ruminococcaceae	Ruminococcaceae_unclassified	0	0	0	0	0	0	0	0	0.0366838	0	0	0	0	0	0	0	0	0	0.00203799
2489	Firmicutes	Clostridia_1	Clostridiales	Ruminococcaceae	Ruminococcaceae_unclassified	0	0	0.0366838	0	0	0	0	0	0	0	0	0	0	0	0	0	0	0	0.00203799
2500	Firmicutes	Clostridia_1	Clostridiales	Ruminococcaceae	Ruminococcaceae_unclassified	0	0	0.0366838	0	0	0	0	0	0	0	0	0	0	0	0	0	0	0	0.00203799
2501	Firmicutes	Clostridia_1	Clostridiales	Ruminococcaceae	Ruminococcaceae_unclassified	0	0	0.0366838	0	0	0	0	0	0	0	0	0	0	0	0	0	0	0	0.00203799
2502	Firmicutes	Clostridia_1	Clostridiales	Ruminococcaceae	Ruminococcaceae_unclassified	0	0	0.0366838	0	0	0	0	0	0	0	0	0	0	0	0	0	0	0	0.00203799
2505	Firmicutes	Clostridia_1	Clostridiales	Ruminococcaceae	Ruminococcaceae_unclassified	0	0	0	0	0	0	0	0	0.0366838	0	0	0	0	0	0	0	0	0	0.00203799
2512	Firmicutes	Clostridia_1	Clostridiales	Ruminococcaceae	Ruminococcaceae_unclassified	0	0	0.0366838	0	0	0	0	0	0	0	0	0	0	0	0	0	0	0	0.00203799
2524	Firmicutes	Clostridia_1	Clostridiales	Ruminococcaceae	Ruminococcaceae_unclassified	0	0	0	0	0	0	0	0	0	0	0	0	0	0	0	0.0366838	0	0	0.00203799
2527	Firmicutes	Clostridia_1	Clostridiales	Ruminococcaceae	Ruminococcaceae_unclassified	0	0	0	0	0	0	0	0	0.0366838	0	0	0	0	0	0	0	0	0	0.00203799
2528	Firmicutes	Clostridia_1	Clostridiales	Ruminococcaceae	Ruminococcaceae_unclassified	0	0	0.0366838	0	0	0	0	0	0	0	0	0	0	0	0	0	0	0	0.00203799
2533	Firmicutes	Clostridia_1	Clostridiales	Ruminococcaceae	Ruminococcaceae_unclassified	0	0	0	0	0	0	0	0	0.0366838	0	0	0	0	0	0	0	0	0	0.00203799
2541	Firmicutes	Clostridia_1	Clostridiales	Ruminococcaceae	Ruminococcaceae_unclassified	0	0	0	0	0	0	0	0	0	0	0	0	0	0	0	0.0366838	0	0	0.00203799
2547	Firmicutes	Clostridia_1	Clostridiales	Ruminococcaceae	Ruminococcaceae_unclassified	0	0	0	0	0	0	0	0	0.0366838	0	0	0	0	0	0	0	0	0	0.00203799
2552	Firmicutes	Clostridia_1	Clostridiales	Ruminococcaceae	Ruminococcaceae_unclassified	0	0	0	0	0	0	0	0	0.0366838	0	0	0	0	0	0	0	0	0	0.00203799
2570	Firmicutes	Clostridia_1	Clostridiales	Ruminococcaceae	Ruminococcaceae_unclassified	0	0	0	0	0	0	0	0	0.0366838	0	0	0	0	0	0	0	0	0	0.00203799
2575	Firmicutes	Clostridia_1	Clostridiales	Ruminococcaceae	Ruminococcaceae_unclassified	0	0	0.0366838	0	0	0	0	0	0	0	0	0	0	0	0	0	0	0	0.00203799
2584	Firmicutes	Clostridia_1	Clostridiales	Ruminococcaceae	Termite_cockroach_cluster	0	0	0	0	0	0	0	0	0.0366838	0	0	0	0	0	0	0	0	0	0.00203799
2585	Firmicutes	Clostridia_1	Clostridiales	Ruminococcaceae	Termite_cockroach_cluster	0	0	0	0	0	0	0	0	0	0	0	0	0	0	0	0.0366838	0	0	0.00203799
2587	Firmicutes	Clostridia_1	Clostridiales	Ruminococcaceae	Termite_cockroach_cluster	0	0	0	0	0	0	0	0	0	0	0	0	0	0	0	0	0	0.0366838	0.00203799
2599	Firmicutes	Clostridia_1	Clostridiales	Ruminococcaceae	Termite_cockroach_cluster	0	0	0	0	0	0	0	0	0	0	0	0	0	0	0	0.0366838	0	0	0.00203799
2601	Firmicutes	Clostridia_1	Clostridiales	Ruminococcaceae	Termite_cockroach_cluster	0	0	0.0366838	0	0	0	0	0	0	0	0	0	0	0	0	0	0	0	0.00203799
2606	Firmicutes	Clostridia_1	Clostridiales	Ruminococcaceae	Termite_cockroach_cluster	0	0	0	0	0	0	0	0	0.0366838	0	0	0	0	0	0	0	0	0	0.00203799
2609	Firmicutes	Clostridia_1	Clostridiales	Ruminococcaceae	Termite_cockroach_cluster	0	0	0	0	0	0	0	0	0.0366838	0	0	0	0	0	0	0	0	0	0.00203799
2610	Firmicutes	Clostridia_1	Clostridiales	Ruminococcaceae	Uncultured_10	0	0	0	0	0	0	0	0	0	0	0	0	0	0	0	0	0	0.0366838	0.00203799
2615	Firmicutes	Clostridia_1	Clostridiales	Ruminococcaceae	Uncultured_28	0	0	0	0	0	0	0	0	0	0	0	0	0	0	0	0	0	0.0366838	0.00203799
2616	Firmicutes	Clostridia_2	Clostridiales	Syntrophomonadaceae	Pelospora	0	0	0.0366838	0	0	0	0	0	0	0	0	0	0	0	0	0	0	0	0.00203799
2619	Firmicutes	Clostridia_2	Clostridiales	Syntrophomonadaceae	Syntrophomonadaceae_unclassified	0	0	0.0366838	0	0	0	0	0	0	0	0	0	0	0	0	0	0	0	0.00203799
2626	Firmicutes	Clostridia_2	Clostridiales_1	Peptococcaceae_1	Uncultured_2	0	0	0	0	0	0	0	0	0.0366838	0	0	0	0	0	0	0	0	0	0.00203799
2630	Firmicutes	Clostridia_2	Clostridiales_1	Veillonellaceae	Acetonema_a	0	0	0	0	0	0	0	0	0	0	0	0	0	0	0	0	0	0.0366838	0.00203799
2632	Firmicutes	Clostridia_2	Clostridiales_1	Veillonellaceae	Uncultured_7	0	0	0	0	0	0	0	0	0	0	0	0	0	0	0	0	0	0.0366838	0.00203799
2636	Firmicutes	Clostridia_2	Clostridiales_1	Veillonellaceae	Veillonellaceae_unclassified	0	0	0.0366838	0	0	0	0	0	0	0	0	0	0	0	0	0	0	0	0.00203799
2644	Firmicutes	Clostridia_2	Clostridiales_1	Veillonellaceae	Veillonellaceae_unclassified	0	0	0.0366838	0	0	0	0	0	0	0	0	0	0	0	0	0	0	0	0.00203799
2648	Firmicutes	Firmicutes_unclassified	Firmicutes_unclassified	Firmicutes_unclassified	Firmicutes_unclassified	0	0	0.0366838	0	0	0	0	0	0	0	0	0	0	0	0	0	0	0	0.00203799
2657	Firmicutes	Firmicutes_unclassified	Firmicutes_unclassified	Firmicutes_unclassified	Firmicutes_unclassified	0	0	0	0	0	0	0	0	0	0	0	0	0	0	0	0	0	0.0366838	0.00203799
2662	Firmicutes	Firmicutes_unclassified	Firmicutes_unclassified	Firmicutes_unclassified	Firmicutes_unclassified	0	0	0.0366838	0	0	0	0	0	0	0	0	0	0	0	0	0	0	0	0.00203799
2663	Firmicutes	Firmicutes_unclassified	Firmicutes_unclassified	Firmicutes_unclassified	Firmicutes_unclassified	0	0	0	0	0	0	0	0	0.0366838	0	0	0	0	0	0	0	0	0	0.00203799
2672	Firmicutes	Firmicutes_unclassified	Firmicutes_unclassified	Firmicutes_unclassified	Firmicutes_unclassified	0	0	0	0	0	0	0	0	0.0366838	0	0	0	0	0	0	0	0	0	0.00203799
2677	Firmicutes	Firmicutes_unclassified	Firmicutes_unclassified	Firmicutes_unclassified	Firmicutes_unclassified	0	0	0	0	0	0	0	0	0.0366838	0	0	0	0	0	0	0	0	0	0.00203799
2681	Firmicutes	Firmicutes_unclassified	Firmicutes_unclassified	Firmicutes_unclassified	Firmicutes_unclassified	0	0	0.0366838	0	0	0	0	0	0	0	0	0	0	0	0	0	0	0	0.00203799
2695	Firmicutes	Firmicutes_unclassified	Firmicutes_unclassified	Firmicutes_unclassified	Firmicutes_unclassified	0	0	0	0	0	0	0	0	0	0	0	0	0	0	0	0.0366838	0	0	0.00203799
2696	Firmicutes	Firmicutes_unclassified	Firmicutes_unclassified	Firmicutes_unclassified	Firmicutes_unclassified	0	0	0	0	0	0	0	0	0	0	0	0	0	0	0	0.0366838	0	0	0.00203799
2698	Firmicutes	Firmicutes_unclassified	Firmicutes_unclassified	Firmicutes_unclassified	Firmicutes_unclassified	0	0	0	0	0	0	0	0	0	0	0	0	0	0	0	0	0	0.0366838	0.00203799
2703	Firmicutes	Firmicutes_unclassified	Firmicutes_unclassified	Firmicutes_unclassified	Firmicutes_unclassified	0	0	0	0	0	0	0	0	0	0	0	0	0	0	0	0	0	0.0366838	0.00203799
2711	Firmicutes	Firmicutes_unclassified	Firmicutes_unclassified	Firmicutes_unclassified	Firmicutes_unclassified	0	0	0	0	0	0	0	0	0	0	0	0	0	0	0	0	0	0.0366838	0.00203799
2714	Firmicutes	Firmicutes_unclassified	Firmicutes_unclassified	Firmicutes_unclassified	Firmicutes_unclassified	0	0	0	0	0	0	0	0	0.0366838	0	0	0	0	0	0	0	0	0	0.00203799
2715	Firmicutes	Firmicutes_unclassified	Firmicutes_unclassified	Firmicutes_unclassified	Firmicutes_unclassified	0	0	0	0	0	0	0	0	0	0	0	0	0	0	0	0	0	0.0366838	0.00203799
2718	Firmicutes	Firmicutes_unclassified	Firmicutes_unclassified	Firmicutes_unclassified	Firmicutes_unclassified	0	0	0.0366838	0	0	0	0	0	0	0	0	0	0	0	0	0	0	0	0.00203799
2722	Firmicutes	Firmicutes_unclassified	Firmicutes_unclassified	Firmicutes_unclassified	Firmicutes_unclassified	0	0	0	0	0	0	0	0	0	0	0	0	0	0	0	0.0366838	0	0	0.00203799
2727	Firmicutes	Firmicutes_unclassified	Firmicutes_unclassified	Firmicutes_unclassified	Firmicutes_unclassified	0	0	0	0	0	0	0	0	0	0	0	0	0	0	0	0.0366838	0	0	0.00203799
2744	Firmicutes	Firmicutes_unclassified	Firmicutes_unclassified	Firmicutes_unclassified	Firmicutes_unclassified	0	0	0	0	0	0	0	0	0	0	0	0	0	0	0	0	0	0.0366838	0.00203799
2751	Firmicutes	Firmicutes_unclassified	Firmicutes_unclassified	Firmicutes_unclassified	Firmicutes_unclassified	0	0	0	0	0	0	0	0	0	0	0	0	0	0	0	0	0	0.0366838	0.00203799
2752	Firmicutes	Firmicutes_unclassified	Firmicutes_unclassified	Firmicutes_unclassified	Firmicutes_unclassified	0	0	0	0	0	0	0	0	0.0366838	0	0	0	0	0	0	0	0	0	0.00203799
2754	Firmicutes	Firmicutes_unclassified	Firmicutes_unclassified	Firmicutes_unclassified	Firmicutes_unclassified	0	0	0	0	0	0	0	0	0	0	0	0	0	0	0	0.0366838	0	0	0.00203799
2756	Firmicutes	Firmicutes_unclassified	Firmicutes_unclassified	Firmicutes_unclassified	Firmicutes_unclassified	0	0	0	0	0	0	0	0	0	0	0	0	0	0	0	0	0	0.0366838	0.00203799
2762	Firmicutes	Firmicutes_unclassified	Firmicutes_unclassified	Firmicutes_unclassified	Firmicutes_unclassified	0	0	0	0	0	0	0	0	0.0366838	0	0	0	0	0	0	0	0	0	0.00203799
2763	Firmicutes	Firmicutes_unclassified	Firmicutes_unclassified	Firmicutes_unclassified	Firmicutes_unclassified	0	0	0	0	0	0	0	0	0	0	0	0	0	0	0	0	0	0.0366838	0.00203799
2775	Planctomycetes	Phycisphaerae	WD2101_soil_group	WD2101_soil_group_unclassified	WD2101_soil_group_unclassified	0	0	0	0	0	0	0	0	0	0	0	0	0	0	0	0	0	0.0366838	0.00203799
2777	Planctomycetes	Phycisphaerae	WD2101_soil_group	WD2101_soil_group_unclassified	WD2101_soil_group_unclassified	0	0	0.0366838	0	0	0	0	0	0	0	0	0	0	0	0	0	0	0	0.00203799
2779	Planctomycetes	Planctomycetacia	Planctomycetales	Planctomycetaceae	Gemmata	0	0	0	0	0	0	0	0	0.0366838	0	0	0	0	0	0	0	0	0	0.00203799
2788	Planctomycetes	Planctomycetacia	Planctomycetales	Planctomycetaceae	Isosphaera	0	0	0	0	0	0	0	0	0	0	0	0	0	0	0	0	0	0.0366838	0.00203799
2790	Planctomycetes	Planctomycetacia	Planctomycetales	Planctomycetaceae	Pir4_lineage	0	0	0.0366838	0	0	0	0	0	0	0	0	0	0	0	0	0	0	0	0.00203799
2794	Planctomycetes	Planctomycetacia	Planctomycetales	Planctomycetaceae	Pirellula	0	0	0.0366838	0	0	0	0	0	0	0	0	0	0	0	0	0	0	0	0.00203799
2796	Planctomycetes	Planctomycetacia	Planctomycetales	Planctomycetaceae	Pirellula	0	0	0	0	0	0	0	0	0	0	0	0	0	0	0	0.0366838	0	0	0.00203799
2798	Planctomycetes	Planctomycetacia	Planctomycetales	Planctomycetaceae	Planctomyces_1	0	0	0	0	0	0	0	0	0	0	0	0	0	0	0	0	0	0.0366838	0.00203799
2804	Planctomycetes	Planctomycetacia	Planctomycetales	Planctomycetaceae	Planctomycetaceae_unclassified	0	0	0	0	0	0	0	0	0.0366838	0	0	0	0	0	0	0	0	0	0.00203799
2807	Planctomycetes	Planctomycetacia	Planctomycetales	Planctomycetaceae	Planctomycetaceae_unclassified	0	0	0	0	0	0	0	0	0.0366838	0	0	0	0	0	0	0	0	0	0.00203799
2808	Planctomycetes	Planctomycetacia	Planctomycetales	Planctomycetaceae	Planctomycetaceae_unclassified	0	0	0	0	0	0	0	0	0	0	0	0	0	0	0	0.0366838	0	0	0.00203799
2810	Planctomycetes	Planctomycetacia	Planctomycetales	Planctomycetaceae	Planctomycetaceae_unclassified	0	0	0	0	0	0	0	0	0.0366838	0	0	0	0	0	0	0	0	0	0.00203799
2816	Planctomycetes	Planctomycetacia	Planctomycetales	Planctomycetaceae	Planctomycetaceae_unclassified	0	0	0	0	0	0	0	0	0	0	0	0	0	0	0	0	0	0.0366838	0.00203799
2817	Planctomycetes	Planctomycetacia	Planctomycetales	Planctomycetaceae	Planctomycetaceae_unclassified	0	0	0	0	0	0	0	0	0	0	0	0	0	0	0	0	0	0.0366838	0.00203799
2820	Planctomycetes	Planctomycetacia	Planctomycetales	Planctomycetaceae	Planctomycetaceae_unclassified	0	0	0	0	0	0	0	0	0	0	0	0	0	0	0	0	0	0.0366838	0.00203799
2825	Planctomycetes	Planctomycetacia	Planctomycetales	Planctomycetaceae	Planctomycetaceae_unclassified	0	0	0	0	0	0	0	0	0	0	0	0	0	0	0	0.0366838	0	0	0.00203799
2828	Planctomycetes	Planctomycetacia	Planctomycetales	Planctomycetaceae	Planctomycetaceae_unclassified	0	0	0	0	0	0	0	0	0	0	0	0	0	0	0	0	0	0.0366838	0.00203799
2829	Planctomycetes	Planctomycetacia	Planctomycetales	Planctomycetaceae	Singulisphaera	0	0	0.0366838	0	0	0	0	0	0	0	0	0	0	0	0	0	0	0	0.00203799
2842	Planctomycetes	Planctomycetacia	Planctomycetales	Planctomycetaceae	Uncultured_32	0	0	0	0	0	0	0	0	0.0366838	0	0	0	0	0	0	0	0	0	0.00203799
2852	Planctomycetes	vadinHA49	Insect_cluster	Insect_cluster_unclassified	Insect_cluster_unclassified	0	0	0.0366838	0	0	0	0	0	0	0	0	0	0	0	0	0	0	0	0.00203799
2854	Planctomycetes	vadinHA49	Insect_cluster	Insect_cluster_unclassified	Insect_cluster_unclassified	0	0	0.0366838	0	0	0	0	0	0	0	0	0	0	0	0	0	0	0	0.00203799
2858	Planctomycetes	vadinHA49	vadinHA49_unclassified	vadinHA49_unclassified	vadinHA49_unclassified	0	0	0.0366838	0	0	0	0	0	0	0	0	0	0	0	0	0	0	0	0.00203799
2859	Proteobacteria	Alphaproteobacteria	Alphaproteobacteria_unclassified	Alphaproteobacteria_unclassified	Alphaproteobacteria_unclassified	0	0	0	0	0	0	0	0	0	0	0	0	0	0	0	0.0366838	0	0	0.00203799
2860	Proteobacteria	Alphaproteobacteria	Alphaproteobacteria_unclassified	Alphaproteobacteria_unclassified	Alphaproteobacteria_unclassified	0	0	0	0	0	0	0	0	0	0	0	0	0	0	0	0	0	0.0366838	0.00203799
2875	Proteobacteria	Alphaproteobacteria	Caulobacterales	Caulobacteraceae	Caulobacter	0	0	0.0366838	0	0	0	0	0	0	0	0	0	0	0	0	0	0	0	0.00203799
2877	Proteobacteria	Alphaproteobacteria	Rhizobiales	Rhodobiaceae	Rhodobium_2	0	0	0.0366838	0	0	0	0	0	0	0	0	0	0	0	0	0	0	0	0.00203799
2879	Proteobacteria	Alphaproteobacteria	Rhizobiales_1	Brucellaceae	Brucellaceae_unclassified	0	0	0	0	0	0	0	0	0.0366838	0	0	0	0	0	0	0	0	0	0.00203799
2884	Proteobacteria	Alphaproteobacteria	Rhizobiales_1	Phyllobacteriaceae	Pseudoaminobacter	0	0	0	0	0	0	0	0	0	0	0	0	0	0	0	0	0	0.0366838	0.00203799
2885	Proteobacteria	Alphaproteobacteria	Rhizobiales_1	Rhizobiales_1_unclassified	Rhizobiales_1_unclassified	0	0	0	0	0	0	0	0	0	0	0	0	0	0	0	0	0	0.0366838	0.00203799
2887	Proteobacteria	Alphaproteobacteria	Rhizobiales_2	Beijerinckiaceae	Chelatococcus_2	0	0	0	0	0	0	0	0	0	0	0	0	0	0	0	0	0	0.0366838	0.00203799
2895	Proteobacteria	Alphaproteobacteria	Rhizobiales_3	Hyphomicrobiaceae	Pedomicrobium	0	0	0.0366838	0	0	0	0	0	0	0	0	0	0	0	0	0	0	0	0.00203799
2898	Proteobacteria	Alphaproteobacteria	Rhodobacterales	Rhodobacteraceae_1	Rhodobacteraceae_1_unclassified	0	0	0	0	0	0	0	0	0	0	0	0	0	0	0	0	0	0.0366838	0.00203799
2910	Proteobacteria	Alphaproteobacteria	Sphingomonadales	Sphingomonadaceae	Sphingomonadaceae_unclassified	0	0	0	0	0	0	0	0	0	0	0	0	0	0	0	0	0	0.0366838	0.00203799
2915	Proteobacteria	Betaproteobacteria	Betaproteobacteria_unclassified	Betaproteobacteria_unclassified	Betaproteobacteria_unclassified	0	0	0	0	0	0	0	0	0	0	0	0	0	0	0	0.0366838	0	0	0.00203799
2918	Proteobacteria	Betaproteobacteria	Betaproteobacteria_unclassified	Betaproteobacteria_unclassified	Betaproteobacteria_unclassified	0	0	0	0	0	0	0	0	0	0	0	0	0	0	0	0.0366838	0	0	0.00203799
2928	Proteobacteria	Betaproteobacteria	SC-I-84	Insect_cluster_II	Insect_cluster_II_unclassified	0	0	0.0366838	0	0	0	0	0	0	0	0	0	0	0	0	0	0	0	0.00203799
2929	Proteobacteria	Betaproteobacteria	SC-I-84	Insect_cluster_II	Insect_cluster_II_unclassified	0	0	0.0366838	0	0	0	0	0	0	0	0	0	0	0	0	0	0	0	0.00203799
2930	Proteobacteria	Betaproteobacteria	SC-I-84	Insect_cluster_II	Insect_cluster_II_unclassified	0	0	0	0	0	0	0	0	0	0	0	0	0	0	0	0.0366838	0	0	0.00203799
2935	Proteobacteria	Deltaproteobacteria	Deltaproteobacteria_unclassified	Deltaproteobacteria_unclassified	Deltaproteobacteria_unclassified	0	0	0.0366838	0	0	0	0	0	0	0	0	0	0	0	0	0	0	0	0.00203799
2948	Proteobacteria	Deltaproteobacteria	Desulfobacterales	Desulfobacteraceae	Desulfatiferula	0	0	0.0366838	0	0	0	0	0	0	0	0	0	0	0	0	0	0	0	0.00203799
2953	Proteobacteria	Deltaproteobacteria	Desulfobacterales	Desulfobacteraceae	Desulfobacteraceae_unclassified	0	0	0	0	0	0	0	0	0.0366838	0	0	0	0	0	0	0	0	0	0.00203799
2961	Proteobacteria	Deltaproteobacteria	Desulfovibrionales	Desulfovibrionaceae	Desulfovibrionaceae_unclassified	0	0	0.0366838	0	0	0	0	0	0	0	0	0	0	0	0	0	0	0	0.00203799
2964	Proteobacteria	Deltaproteobacteria	Desulfovibrionales	Desulfovibrionaceae	Gut_cluster_3	0	0	0	0	0	0	0	0	0.0366838	0	0	0	0	0	0	0	0	0	0.00203799
2969	Proteobacteria	Deltaproteobacteria	Desulfovibrionales	Desulfovibrionaceae	Gut_cluster_3	0	0	0.0366838	0	0	0	0	0	0	0	0	0	0	0	0	0	0	0	0.00203799
2971	Proteobacteria	Deltaproteobacteria	Desulfovibrionales	Desulfovibrionaceae	Gut_cluster_3	0	0	0	0	0	0	0	0	0	0	0	0	0	0	0	0	0	0.0366838	0.00203799
2989	Proteobacteria	Deltaproteobacteria	Desulfovibrionales	Desulfovibrionaceae	Gut_cluster_3	0	0	0	0	0	0	0	0	0	0	0	0	0	0	0	0.0366838	0	0	0.00203799
2996	Proteobacteria	Deltaproteobacteria	Desulfovibrionales	Desulfovibrionaceae	Gut_cluster_3	0	0	0.0366838	0	0	0	0	0	0	0	0	0	0	0	0	0	0	0	0.00203799
2998	Proteobacteria	Deltaproteobacteria	Desulfovibrionales	Desulfovibrionaceae	Gut_cluster_3	0	0	0	0	0	0	0	0	0	0	0	0	0	0	0	0.0366838	0	0	0.00203799
2999	Proteobacteria	Deltaproteobacteria	Desulfovibrionales	Desulfovibrionaceae	Gut_cluster_3	0	0	0	0	0	0	0	0	0	0	0	0	0	0	0	0.0366838	0	0	0.00203799
3012	Proteobacteria	Deltaproteobacteria	Desulfovibrionales	Desulfovibrionaceae	Gut_cluster_3	0	0	0	0	0	0	0	0	0.0366838	0	0	0	0	0	0	0	0	0	0.00203799
3016	Proteobacteria	Deltaproteobacteria	Desulfovibrionales	Desulfovibrionaceae	Gut_cluster_3	0	0	0.0366838	0	0	0	0	0	0	0	0	0	0	0	0	0	0	0	0.00203799
3018	Proteobacteria	Deltaproteobacteria	Desulfovibrionales	Desulfovibrionaceae	Termite_cluster_III	0	0	0.0366838	0	0	0	0	0	0	0	0	0	0	0	0	0	0	0	0.00203799
3029	Proteobacteria	Deltaproteobacteria	Myxococcales	Myxococcales_unclassified	Myxococcales_unclassified	0	0	0.0366838	0	0	0	0	0	0	0	0	0	0	0	0	0	0	0	0.00203799
3042	Proteobacteria	Gammaproteobacteria	Xanthomonadales	Xanthomonadaceae	Pseudoxanthomonas	0	0	0	0	0	0	0	0	0.0366838	0	0	0	0	0	0	0	0	0	0.00203799
3045	Proteobacteria	Gammaproteobacteria_1	Enterobacteriales	Enterobacteriaceae	Enterobacter_2	0	0	0	0	0	0	0	0	0	0	0	0	0	0	0	0.0366838	0	0	0.00203799
3048	Proteobacteria	Gammaproteobacteria_1	Oceanospirillales	Oceanospirillaceae	Pseudospirillum	0	0	0	0	0	0	0	0	0	0	0	0	0	0	0	0	0	0.0366838	0.00203799
3052	Proteobacteria	Gammaproteobacteria_2	Legionellales	Coxiellaceae	Aquicella	0	0	0	0	0	0	0	0	0	0	0	0	0	0	0	0	0	0.0366838	0.00203799
3056	Proteobacteria	Gammaproteobacteria_2	Legionellales	Coxiellaceae	Coxiella	0	0	0	0	0	0	0	0	0.0366838	0	0	0	0	0	0	0	0	0	0.00203799
3059	Proteobacteria	Gammaproteobacteria_2	Legionellales	Legionellaceae	Legionellaceae_unclassified	0	0	0	0	0	0	0	0	0	0	0	0	0	0	0	0	0	0.0366838	0.00203799
3060	Proteobacteria	Gammaproteobacteria_2	Legionellales	Legionellaceae	Legionellaceae_unclassified	0	0	0	0	0	0	0	0	0	0	0	0	0	0	0	0.0366838	0	0	0.00203799
3070	Proteobacteria	Proteobacteria_unclassified	Proteobacteria_unclassified	Proteobacteria_unclassified	Proteobacteria_unclassified	0	0	0	0	0	0	0	0	0.0366838	0	0	0	0	0	0	0	0	0	0.00203799
3073	Proteobacteria	Proteobacteria_unclassified	Proteobacteria_unclassified	Proteobacteria_unclassified	Proteobacteria_unclassified	0	0	0	0	0	0	0	0	0	0	0	0	0	0	0	0.0366838	0	0	0.00203799
3088	Synergistetes	Synergistia	Synergistales	Synergistaceae	Synergistaceae_unclassified	0	0	0	0	0	0	0	0	0	0	0	0	0	0	0	0	0	0.0366838	0.00203799
3101	Verrucomicrobia	Spartobacteria	Chthoniobacter	Chthoniobacter_unclassified	Chthoniobacter_unclassified	0	0	0.0366838	0	0	0	0	0	0	0	0	0	0	0	0	0	0	0	0.00203799
3102	Verrucomicrobia	Spartobacteria	Chthoniobacter	Chthoniobacter_unclassified	Chthoniobacter_unclassified	0	0	0	0	0	0	0	0	0.0366838	0	0	0	0	0	0	0	0	0	0.00203799
3110	Verrucomicrobia	Verrucomicrobiae	Verrucomicrobiales	Verrucomicrobiaceae_2	Uncultured_1	0	0	0	0	0	0	0	0	0	0	0	0	0	0	0	0	0	0.0366838	0.00203799
3121	unknown	unknown_unclassified	unknown_unclassified	unknown_unclassified	unknown_unclassified	0	0	0	0	0	0	0	0	0	0	0	0	0	0	0	0	0	0.0366838	0.00203799
3131	unknown	unknown_unclassified	unknown_unclassified	unknown_unclassified	unknown_unclassified	0	0	0.0366838	0	0	0	0	0	0	0	0	0	0	0	0	0	0	0	0.00203799
3145	unknown	unknown_unclassified	unknown_unclassified	unknown_unclassified	unknown_unclassified	0	0	0	0	0	0	0	0	0.0366838	0	0	0	0	0	0	0	0	0	0.00203799
1710	Acidobacteria	Acidobacteria	Acidobacteriales	Acidobacteriaceae	Uncultured_31	0	0.0244559	0	0	0	0	0	0	0	0	0	0	0	0	0	0	0	0	0.00135866
1711	Acidobacteria	Acidobacteria	Acidobacteriales	Acidobacteriaceae	Uncultured_31	0	0.0244559	0	0	0	0	0	0	0	0	0	0	0	0	0	0	0	0	0.00135866
1718	Actinobacteria	Actinobacteria	Acidimicrobiales	Acidimicrobiaceae_1	Uncultured_4	0	0.0244559	0	0	0	0	0	0	0	0	0	0	0	0	0	0	0	0	0.00135866
1723	Actinobacteria	Actinobacteria	Acidimicrobiales	Uncultured_2	Uncultured_2_unclassified	0	0.0244559	0	0	0	0	0	0	0	0	0	0	0	0	0	0	0	0	0.00135866
1748	Actinobacteria	Actinobacteria	AKIW543	AKIW543_unclassified	AKIW543_unclassified	0	0.0244559	0	0	0	0	0	0	0	0	0	0	0	0	0	0	0	0	0.00135866
1757	Actinobacteria	Actinobacteria	Coriobacteriales	Coriobacteriaceae	Uncultured_9	0	0.0244559	0	0	0	0	0	0	0	0	0	0	0	0	0	0	0	0	0.00135866
1764	Actinobacteria	Actinobacteria	Corynebacteriales	Mycobacteriaceae	Mycobacterium	0	0.0244559	0	0	0	0	0	0	0	0	0	0	0	0	0	0	0	0	0.00135866
1768	Actinobacteria	Actinobacteria	Frankiales	Cryptosporangiaceae	Cryptosporangium	0	0.0244559	0	0	0	0	0	0	0	0	0	0	0	0	0	0	0	0	0.00135866
1773	Actinobacteria	Actinobacteria	Micrococcales_3	Microbacteriaceae	Microbacteriaceae_unclassified	0	0.0244559	0	0	0	0	0	0	0	0	0	0	0	0	0	0	0	0	0.00135866
1774	Actinobacteria	Actinobacteria	Micrococcales_3	Microbacteriaceae	Microbacteriaceae_unclassified	0	0.0244559	0	0	0	0	0	0	0	0	0	0	0	0	0	0	0	0	0.00135866
1801	Bacteroidetes	Bacteroidetes_unclassified	Bacteroidetes_unclassified	Bacteroidetes_unclassified	Bacteroidetes_unclassified	0	0.0244559	0	0	0	0	0	0	0	0	0	0	0	0	0	0	0	0	0.00135866
1821	Bacteroidetes	Bacteroidetes_unclassified	Bacteroidetes_unclassified	Bacteroidetes_unclassified	Bacteroidetes_unclassified	0	0.0244559	0	0	0	0	0	0	0	0	0	0	0	0	0	0	0	0	0.00135866
1836	Bacteroidetes	Bacteroidetes_unclassified	Bacteroidetes_unclassified	Bacteroidetes_unclassified	Bacteroidetes_unclassified	0	0.0244559	0	0	0	0	0	0	0	0	0	0	0	0	0	0	0	0	0.00135866
1839	Bacteroidetes	Bacteroidia	Bacteroidales	Bacteroidaceae	Bacteroides	0	0.0244559	0	0	0	0	0	0	0	0	0	0	0	0	0	0	0	0	0.00135866
1856	Bacteroidetes	Bacteroidia	Bacteroidales	Bacteroidales_unclassified	Bacteroidales_unclassified	0	0.0244559	0	0	0	0	0	0	0	0	0	0	0	0	0	0	0	0	0.00135866
1860	Bacteroidetes	Bacteroidia	Bacteroidales	Bacteroidales_unclassified	Bacteroidales_unclassified	0	0.0244559	0	0	0	0	0	0	0	0	0	0	0	0	0	0	0	0	0.00135866
1870	Bacteroidetes	Bacteroidia	Bacteroidales	Bacteroidales_unclassified	Bacteroidales_unclassified	0	0.0244559	0	0	0	0	0	0	0	0	0	0	0	0	0	0	0	0	0.00135866
1886	Bacteroidetes	Bacteroidia	Bacteroidales	Bacteroidales_unclassified	Bacteroidales_unclassified	0	0.0244559	0	0	0	0	0	0	0	0	0	0	0	0	0	0	0	0	0.00135866
1889	Bacteroidetes	Bacteroidia	Bacteroidales	Bacteroidales_unclassified	Bacteroidales_unclassified	0	0.0244559	0	0	0	0	0	0	0	0	0	0	0	0	0	0	0	0	0.00135866
1900	Bacteroidetes	Bacteroidia	Bacteroidales	Bacteroidales_unclassified	Bacteroidales_unclassified	0	0.0244559	0	0	0	0	0	0	0	0	0	0	0	0	0	0	0	0	0.00135866
1931	Bacteroidetes	Bacteroidia	Bacteroidales	Porphyromonadaceae_1	Dysgonomonas	0	0.0244559	0	0	0	0	0	0	0	0	0	0	0	0	0	0	0	0	0.00135866
1934	Bacteroidetes	Bacteroidia	Bacteroidales	Porphyromonadaceae_1	Dysgonomonas	0	0.0244559	0	0	0	0	0	0	0	0	0	0	0	0	0	0	0	0	0.00135866
1950	Bacteroidetes	Bacteroidia	Bacteroidales	Porphyromonadaceae_3	Cluster_IV	0	0.0244559	0	0	0	0	0	0	0	0	0	0	0	0	0	0	0	0	0.00135866
1951	Bacteroidetes	Bacteroidia	Bacteroidales	Porphyromonadaceae_3	Porphyromonadaceae_3_unclassified	0	0.0244559	0	0	0	0	0	0	0	0	0	0	0	0	0	0	0	0	0.00135866
1965	Bacteroidetes	Bacteroidia	Bacteroidales	Porphyromonadaceae_3	Porphyromonadaceae_3_unclassified	0	0.0244559	0	0	0	0	0	0	0	0	0	0	0	0	0	0	0	0	0.00135866
2006	Bacteroidetes	Bacteroidia	Bacteroidales	Rikenellaceae	Alisitpes_IV	0	0.0244559	0	0	0	0	0	0	0	0	0	0	0	0	0	0	0	0	0.00135866
2020	Bacteroidetes	Bacteroidia	Bacteroidales	Rikenellaceae	Rikenellaceae_unclassified	0	0.0244559	0	0	0	0	0	0	0	0	0	0	0	0	0	0	0	0	0.00135866
2029	Candidate_phylum_TM6	Candidate_phylum_TM6_unclassified	Candidate_phylum_TM6_unclassified	Candidate_phylum_TM6_unclassified	Candidate_phylum_TM6_unclassified	0	0.0244559	0	0	0	0	0	0	0	0	0	0	0	0	0	0	0	0	0.00135866
2044	Chloroflexi	TK10	TK10_unclassified	TK10_unclassified	TK10_unclassified	0	0.0244559	0	0	0	0	0	0	0	0	0	0	0	0	0	0	0	0	0.00135866
2074	Firmicutes	Bacilli	Lactobacillales	Lactobacillaceae	Lactobacillaceae_unclassified	0	0.0244559	0	0	0	0	0	0	0	0	0	0	0	0	0	0	0	0	0.00135866
2089	Firmicutes	Bacilli	Lactobacillales	Lactobacillales_unclassified	Lactobacillales_unclassified	0	0.0244559	0	0	0	0	0	0	0	0	0	0	0	0	0	0	0	0	0.00135866
2092	Firmicutes	Bacilli	Lactobacillales	Lactobacillales_unclassified	Lactobacillales_unclassified	0	0.0244559	0	0	0	0	0	0	0	0	0	0	0	0	0	0	0	0	0.00135866
2122	Firmicutes	Bacilli	Lactobacillales	Leuconostocaceae	Weissella_1	0	0.0244559	0	0	0	0	0	0	0	0	0	0	0	0	0	0	0	0	0.00135866
2144	Firmicutes	Clostridia_1	Clostridiales	Clostridiales_unclassified	Clostridiales_unclassified	0	0.0244559	0	0	0	0	0	0	0	0	0	0	0	0	0	0	0	0	0.00135866
2223	Firmicutes	Clostridia_1	Clostridiales	Clostridiales_unclassified	Clostridiales_unclassified	0	0.0244559	0	0	0	0	0	0	0	0	0	0	0	0	0	0	0	0	0.00135866
2226	Firmicutes	Clostridia_1	Clostridiales	Clostridiales_unclassified	Clostridiales_unclassified	0	0.0244559	0	0	0	0	0	0	0	0	0	0	0	0	0	0	0	0	0.00135866
2266	Firmicutes	Clostridia_1	Clostridiales	Lachnospiraceae	Gut_cluster_13	0	0.0244559	0	0	0	0	0	0	0	0	0	0	0	0	0	0	0	0	0.00135866
2267	Firmicutes	Clostridia_1	Clostridiales	Lachnospiraceae	Gut_cluster_13	0	0.0244559	0	0	0	0	0	0	0	0	0	0	0	0	0	0	0	0	0.00135866
2269	Firmicutes	Clostridia_1	Clostridiales	Lachnospiraceae	Gut_cluster_13	0	0.0244559	0	0	0	0	0	0	0	0	0	0	0	0	0	0	0	0	0.00135866
[truncated: 1,148 more rows]
